# Supplementary material for: Trojan Horse Siderophore Conjugates Induce Pseudomonas aeruginosa Suicide and Qualify the TonB Protein as a Novel Antibiotic Target
Source: PubMed Central journal article supplement — J Med Chem. 2022 Dec 22;66(1):553–76. doi: 10.1021/acs.jmedchem.2c01489 (PMC9841981; doi:10.1021/acs.jmedchem.2c01489), 2022-12-22
Supplement: jm2c01489_si_001.pdf [file jm2c01489_si_001.pdf]

## SUPPORTING INFORMATION

### **Trojan Horse siderophore conjugates induce *P. aeruginosa* suicide and qualify the TonB protein as a novel antibiotic target**

Carsten Peukert<sup>‡%</sup>, Véronique Gasser<sup>#~%</sup>, Till Orth<sup>‡%</sup>, Sarah Fritsch<sup>#~</sup>, Vincent Normant<sup>#~</sup>, Olivier Cunrath<sup>#~</sup>, Isabelle J. Schalk<sup>#~\*</sup>, Mark Brönstrup<sup>‡§\$\*</sup>

‡ Department of Chemical Biology, Helmholtz Centre for Infection Research, Inhoffenstraße 7, 38124 Braunschweig

§ German Center for Infection Research (DZIF), Site Hannover-Braunschweig, 38124 Braunschweig, Germany

\$ Center for Biomolecular Drug Research (BMWZ), Schneiderberg 38, 30167 Hannover

# CNRS, University of Strasbourg, UMR7242, UMR7242, ESBS, Bld Sébastien Brant, F-67412 Illkirch, Strasbourg, France

~ University of Strasbourg, UMR7242, ESBS, Bld Sébastien Brant, F-67412 Illkirch, Strasbourg, France

% These authors contributed equally

Corresponding authors are marked with an \*, e-mail addresses: [Mark.Broenstrup@helmholtz-hzi.de](mailto:Mark.Broenstrup@helmholtz-hzi.de) and [isabelle.schalk@unistra.fr](mailto:isabelle.schalk@unistra.fr)

## Table of contents

|                                                                  |            |
|------------------------------------------------------------------|------------|
| <b>General chemical information</b> .....                        | <b>S4</b>  |
| Chemistry figures, schemes and tables .....                      | S5         |
| Scheme S1: .....                                                 | S5         |
| Scheme S2: .....                                                 | S6         |
| Scheme S3: .....                                                 | S7         |
| Scheme S4: .....                                                 | S8         |
| Scheme S5: .....                                                 | S9         |
| Scheme S6: .....                                                 | S10        |
| Table S1: .....                                                  | S11        |
| Scheme S7: .....                                                 | S12        |
| Table S2 .....                                                   | S13        |
| Scheme S8: .....                                                 | S14        |
| Conjugate synthesis .....                                        | S15        |
| Table S3: .....                                                  | S15        |
| Scheme S9: .....                                                 | S16        |
| Table S4: .....                                                  | S17        |
| Scheme S10: .....                                                | S18        |
| Table S5: .....                                                  | S18        |
| Structures of synthesized intermediates and final compounds..... | S19        |
| <b>Supplementary biological information</b> .....                | <b>S38</b> |
| Literature information on <i>P. aeruginosa</i> 's TBDTs .....    | S38        |
| Figure S1: .....                                                 | S38        |
| Table S6: .....                                                  | S39        |

|                                                                                               |             |
|-----------------------------------------------------------------------------------------------|-------------|
| Figure S2: .....                                                                              | S39         |
| <b>Biology methods .....</b>                                                                  | <b>S40</b>  |
| Fe-Chrome Azurol S (CAS) assay .....                                                          | S40         |
| Figure S3: .....                                                                              | S41         |
| Table S7: .....                                                                               | S42         |
| Antimicrobial susceptibility assays .....                                                     | S43         |
| RT-qPCR analysis in PAO1 wildtype and mutant strains.....                                     | S43         |
| Growth kinetic in function of time in the absence and presence of vectors and conjugates..... | S43         |
| Table S8: .....                                                                               | S44         |
| Table S9. ....                                                                                | S45         |
| Figure S4: .....                                                                              | S46         |
| <b>Appendix .....</b>                                                                         | <b>S47</b>  |
| NMR and MS spectra .....                                                                      | S47         |
| 2D-NMR data and MS/MS spectra.....                                                            | S134        |
| LC traces .....                                                                               | S141        |
| <b>Supplementary References .....</b>                                                         | <b>S177</b> |

## General chemical information

Unless otherwise mentioned, reagents were purchased and used without further purification. All employed solvents for workups and purifications were HPLC purity grade. Solid-phase peptide synthesis (SPPS) was performed on an automated Syro Multiple Peptide Synthesizer (MultiSynTech, Witten, Germany) with a Rapp TentaGel® S RAM resin (Rapp Polymere, Tübingen, Germany). Centrifugations were performed on a Universal 32 R centrifuge (Hettich).

With the exception of biphasic reactions or reactions in water, all reactions were carried out in anhydrous solvents. Moisture-sensitive reactions were carried out oven-dried glassware under argon atmosphere. Reaction progress was monitored by TLC (silica gel 60 F<sub>254</sub>, on aluminum/glass, Merck®).

Automatic preparative column chromatography was performed on a Grace Reveleris® X2 instrument (Büchi®) with disposable columns (Reveleris® Flash Cartridges Silica 40 µm, Büchi).

Purifications by RP-HPLC were performed on a Pure C-850 (Büchi) or Dionex Ultimate (Thermo Fisher Scientific) on a Phenomenex Gemini C18 RP-column 00G-4436-NO, 10 µm, 110 A, 250×10.00 mm (5 mL/min) or Phenomenex Gemini C18 RP-column 00G-4435-PO-AX, 5 µm, 110 A, 250×21.20 mm (10 mL/min). Substances were subsequently freeze-dried on an Alpha 2-4 LSCbasic (Christ) instrument.

High resolution mass spectrometry (HRMS) was performed using a Dionex Ultimate 3000 HPLC system equipped with a DAD detector and a Bruker maxis HD QTOF mass detector with electrospray ionization (ESI). Samples were injected directly *via* an Ultimate 3000RS autosampler (Thermo Fisher Scientific). The mass-to-charge ratios (*m/z*) are indicated.

All isolated compounds were characterized by <sup>1</sup>H-, <sup>13</sup>C-NMR spectra, and/or ESI-HRMS.

Yields are calculated based on substance purity ≥95% as confirmed by NMR and MS.

NMR spectra were acquired on Advance III 500 with the probe head PABBO BB/19F-1H/D Z-GRD (500 MHz for <sup>1</sup>H, 125 MHz for <sup>13</sup>C), and Advance III HD 700 with cryo platform and the probe head CPTCI 1H-13C/15N/D Z-GRD (700 MHz for <sup>1</sup>H, 176 MHz for <sup>13</sup>C) from Bruker. The measured substances were dissolved in the respective deuterated solvent and the chemical shifts  $\delta$  are given in ppm. Multiplicities of the individual signals are as follows: s (singlet), d (doublet), t (triplet), q (quartet), quint (quintet) and combinations thereof, dd (doublet of doublet), tt (triplet of triplet), dt (doublet of triplet), td (triplet of doublet), etc. Others include: bs (broad singlet) and m (multiplet). All spectra were interpreted as first order spectra. The coupling constants *J* are given in hertz (Hz) and refer to <sup>1</sup>H-<sup>1</sup>H couplings.

## Chemistry figures, schemes and tables

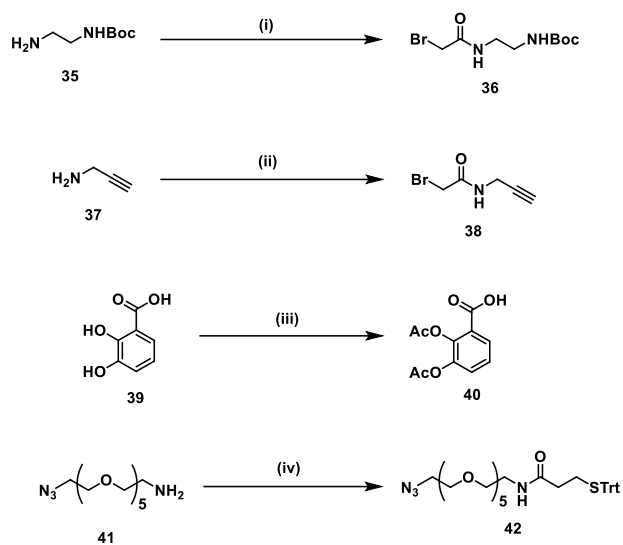

**Scheme S1:** Synthesis of siderophore building blocks **36**, **38**, **40** and **42**. (i)  $\text{BrCH}_2\text{COBr}$ ,  $\text{K}_2\text{CO}_3$ ,  $\text{H}_2\text{O}/\text{CH}_2\text{Cl}_2$ , 0-23 °C, 2 h, 95% (ii)  $\text{BrCH}_2\text{COBr}$ ,  $\text{K}_2\text{CO}_3$ ,  $\text{H}_2\text{O}/\text{CH}_2\text{Cl}_2$ , 0-23 °C, 2 h, 81%, (iii)  $\text{Ac}_2\text{O}$ , TEA, DMAP, THF, 23-60 °C, 2h 96%, (iv)  $(\text{C}_6\text{H}_5)_3\text{CS(CH}_2\text{)}_2\text{COOH}$ , HATU, TEA,  $\text{CH}_2\text{Cl}_2/\text{DMF}$ , 23 °C, 21 h, 76%.

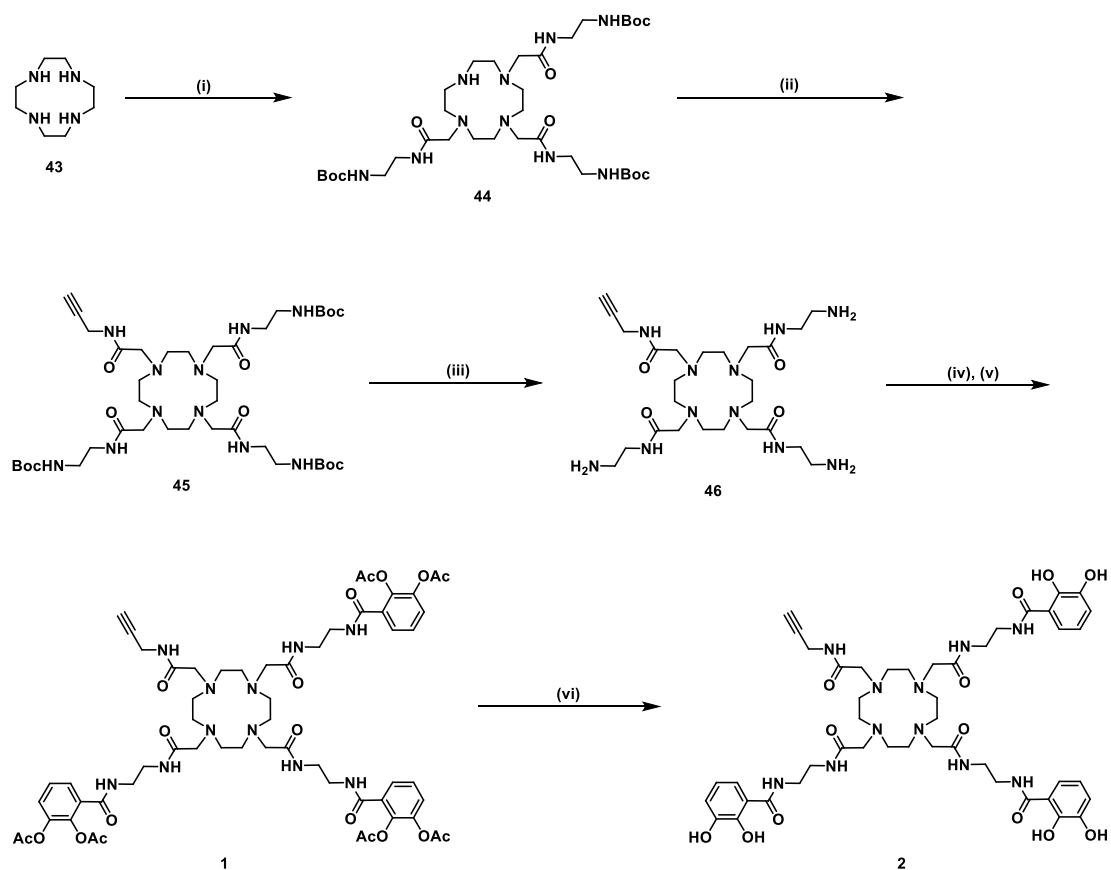

**Scheme S2:** Synthesis of DOTAM siderophores **1** and **2**. (i) **36**, NaOAc, ACN, 23 °C, 21 h, (ii) **38**, K<sub>2</sub>CO<sub>3</sub>, ACN, 23 °C, 21 h, (iii) 25% TFA, DCM, 0-23 °C, 4 h, 82% over 3 steps, (iv) **40**, (COCl)<sub>2</sub>, DCM/DMF, 0-23 °C, 3 h, (v) NaHCO<sub>3</sub>, H<sub>2</sub>O/1,4-dioxane, 0-23 °C, 6 h, (vi) 20% DIPEA, MeOH, 0-23 °C, 4 h, 80% over two steps.

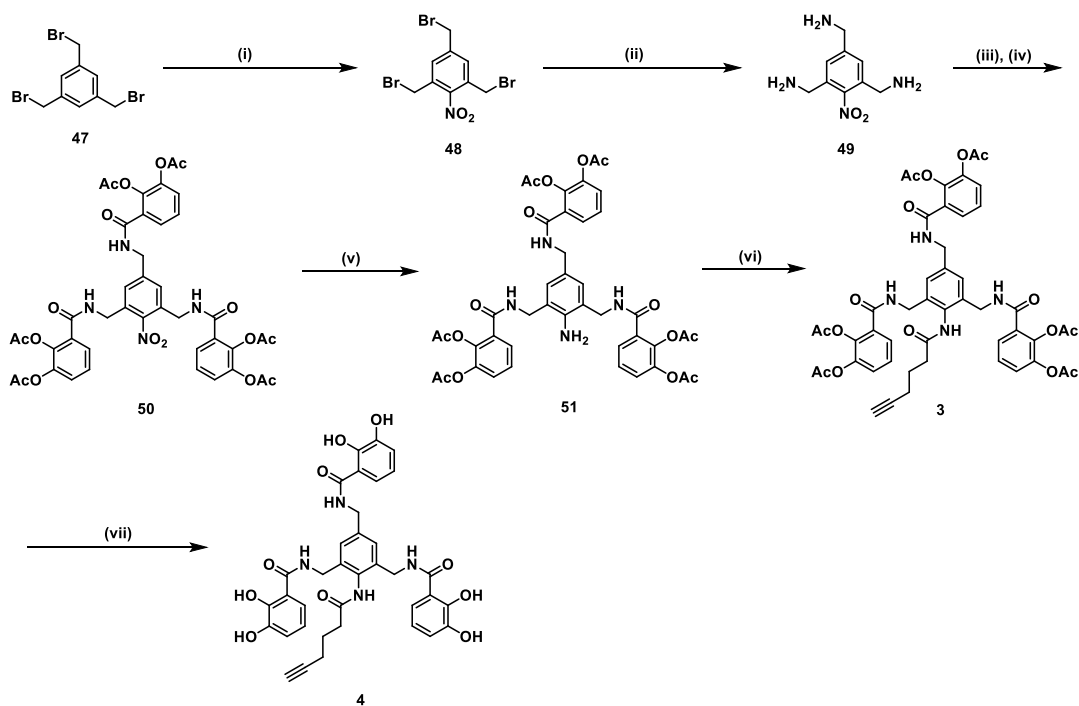

**Scheme S3:** Synthesis of MECAM siderophores **3** and **4**. (i)  $\text{HNO}_3$  (50%),  $\text{H}_2\text{SO}_4$ , 0-23 °C, 48 h, 98%, (ii)  $\text{NH}_4\text{OH}$  (30%), THF/EtOH, 23 °C, 21 h, (iii) **40**,  $(\text{COCl})_2$ , DCM/DMF, 0-23 °C, 3 h, (iv)  $\text{NaHCO}_3$ ,  $\text{H}_2\text{O}/1,4\text{-dioxane}$ , 0-23 °C, 6 h, over two steps 68%, (v) Zn dust, AcOH, THF/EtOH, 0-23 °C, 1 h, (vi) 5-hexynoic acid, *i*BuCF, NMM, THF, 0-23 °C, 6 h, over two steps 56%, (vii) 20% DIPEA, MeOH, 0-23 °C, 4 h, 90%.

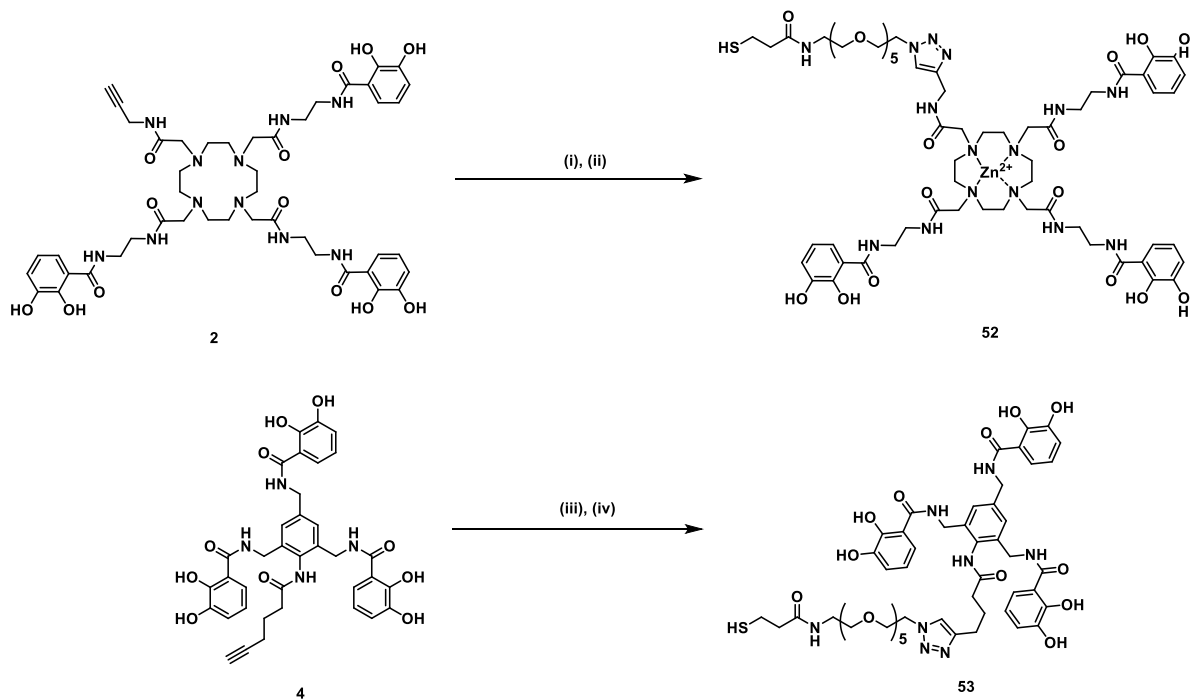

**Scheme S4:** Synthesis of thio-DOTAM (**52**) and MECAM (**53**) derivatives. (i)  $\text{Zn}(\text{CH}_3\text{COO})_2$ , DMSO/ $\text{H}_2\text{O}$ , 23 °C, 5 min, then **44**, DMSO, 23 °C, 5 min, then  $\text{CuSO}_4$ , sodium ascorbate, THPTA, PBS pH 7.4, 23 °C, 1 h, 76%, (ii) 25% TFA, TIPS, DCM, 0-23 °C, 2 h, 94%. (iii) **44**, DMSO/ $\text{H}_2\text{O}$ , 23 °C, 5 min, then  $\text{CuSO}_4$ , sodium ascorbate, THPTA, PBS pH 7.4, 23 °C, 1 h, 82%, (iv) 25% TFA, TIPS, DCM, 0-23 °C, 2 h, 90%.



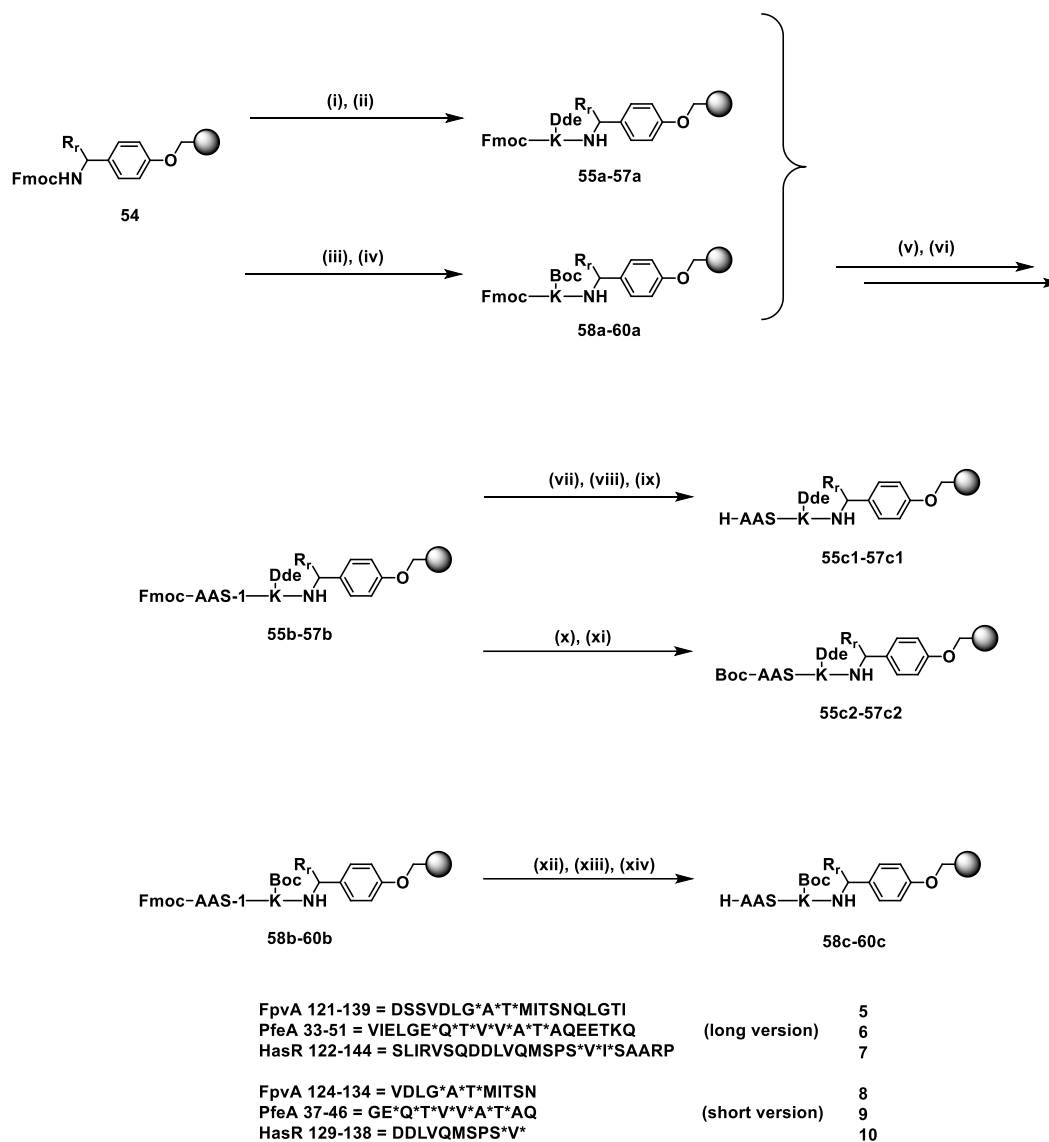

**Scheme S5:** Synthesis of (unmodified) peptide precursors *via* SPPS. \* = mark complicated couplings determined by *Peptide Companion* (1.25 CoshiSoft/PeptiSearch, 2000) and were performed with double coupling and capping. For the long peptide sequences, an Fmoc- or Boc-protected amino acid at the  $\alpha$ -amino group was introduced as the terminal amino acid. (i) piperidine, DMF, 23 °C, 10 min, (ii) Fmoc-Lys(Dde)-OH, HATU, DIPEA, DMF, 23 °C, 1 h, (iii) piperidine, DMF, 23 °C, 10 min, (iv) Fmoc-Lys(Boc)-OH, HATU, DIPEA, DMF, 23 °C, 1 h, (v) piperidine, DMF, 23 °C, 10 min, (vi) protected Fmoc-aa, HCTU, DIPEA, DMF, 23 °C, 1 h, (vii) piperidine, DMF, 23 °C, 10 min, (viii) protected Fmoc-aa, HCTU, DIPEA, DMF, 23 °C, 1 h, (ix) piperidine, DMF, 23 °C, 10 min, (x) piperidine, DMF, 23 °C, 10 min, (xi) protected Boc-aa, HATU, DIPEA, DMF, 23 °C, 1 h, (xii) piperidine, DMF, 23 °C, 10 min, (xiii) protected Fmoc-aa, HCTU, DIPEA, DMF, 23 °C, 1 h, (xiv) piperidine, DMF, 23 °C, 10 min.



**Table S1:** Synthesis characteristics of the unmodified peptides **5-10**. aa = amino acid, (l) = long peptide, (s) = short peptide.

| <b>#</b>  | <b>Peptides</b> | <b>aa</b> | <b>Cycles</b> | <b>Time <math>t</math> [h]</b> | <b>Steps</b> | <b>Yield [%]</b> | <b>Yield/step [%]</b> |
|-----------|-----------------|-----------|---------------|--------------------------------|--------------|------------------|-----------------------|
| <b>5</b>  | <i>FpvA</i> (l) | 20        | 23            | 34                             | 22           | 16               | 92                    |
| <b>6</b>  | <i>PfeA</i> (l) | 20        | 27            | 39                             | 22           | 27               | 94                    |
| <b>7</b>  | <i>HasR</i> (l) | 24        | 27            | 38                             | 26           | 12               | 92                    |
| <b>8</b>  | <i>FpvA</i> (s) | 12        | 15            | 21                             | 13           | 33               | 92                    |
| <b>9</b>  | <i>PfeA</i> (s) | 11        | 18            | 25                             | 12           | 52               | 95                    |
| <b>10</b> | <i>HasR</i> (s) | 11        | 13            | 19                             | 12           | 36               | 92                    |

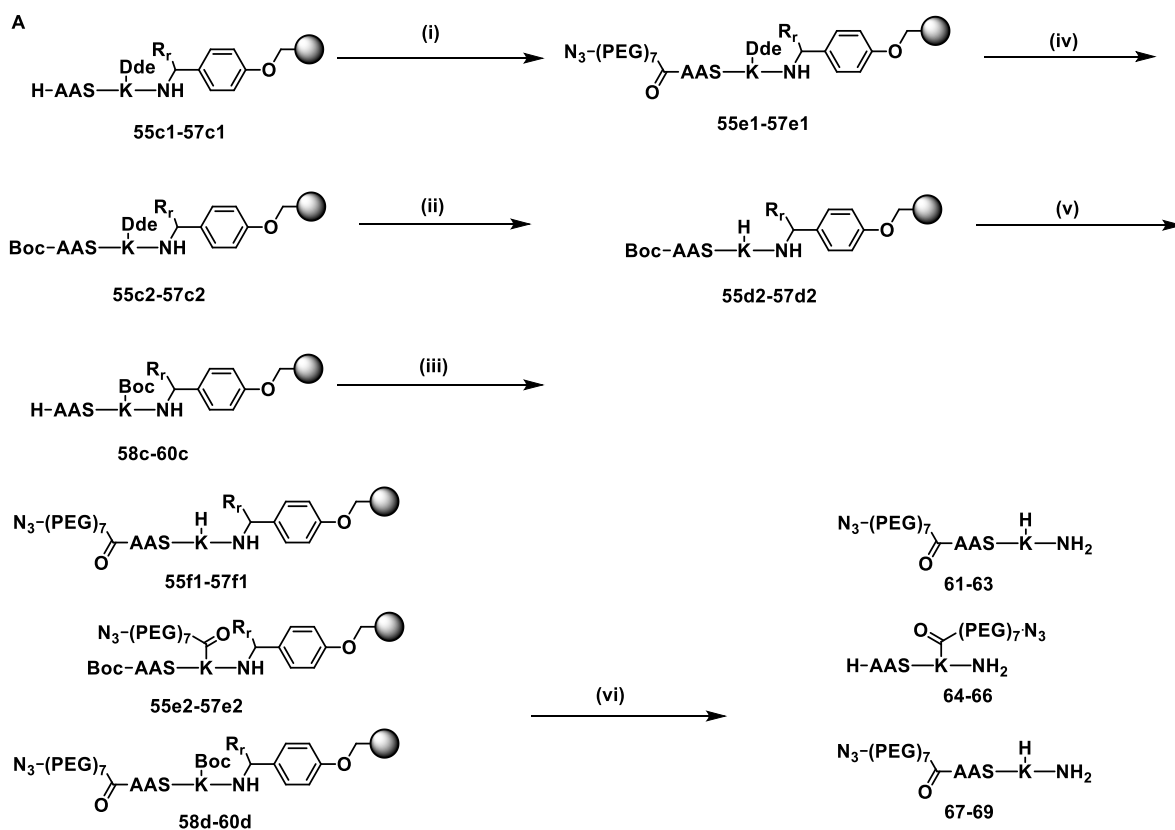

|                                          |                 |        |
|------------------------------------------|-----------------|--------|
| FpvA 121-139 = DSSVDLG*A*T*MITSNQLGTI    |                 | 61, 67 |
| PfeA 33-51 = VIELGE*Q*T*V*V*A*T*AQEETKQ  | (long version)  | 62, 68 |
| HasR 122-144 = SLIRVSQDDLQMSPS*V*I*SAARP |                 | 63, 69 |
|                                          |                 |        |
| FpvA 124-134 = VDLG*A*T*MITSN            |                 | 64     |
| PfeA 37-46 = GE*Q*T*V*V*A*T*AQ           | (short version) | 65     |
| HasR 129-138 = DDLVQMSPS*V*              |                 | 66     |

C/N-term. N<sub>3</sub> - modified peptide

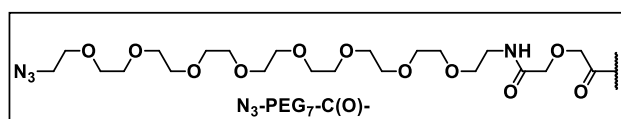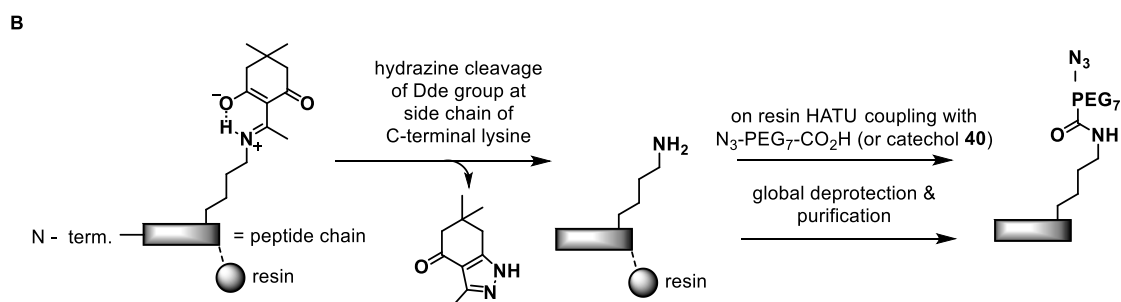

**Scheme S7:** Syntheses of *N*- & *C*-terminal PEG-modified peptides **61-69**. (i) N<sub>3</sub>-PEG<sub>7</sub>-CO<sub>2</sub>H, HOBT, HATU, NMM, DMF, 23 °C, 21 h, (ii) 1.0 M hydrazine in THF, DMF, 23 °C, 3 h, (iii) N<sub>3</sub>-PEG<sub>7</sub>-CO<sub>2</sub>H, HOBT, HATU, NMM, DMF, 23 °C, 21 h, (iv) 1.0 M hydrazine in THF, DMF, 23 °C, 3 h, (v) N<sub>3</sub>-PEG<sub>7</sub>-CO<sub>2</sub>H, HOBT, HATU, NMM, DMF, 23 °C, 21 h, (vi) 95% TFA; 3% TIPS, 2% H<sub>2</sub>O, 23 °C, 3 h, over 13 to 27 steps with 10-33%. (B) Schematic strategy for *C*-terminal modification of peptides, also employed for PTDP-peptides **70** and for monocatechol conjugates **33** and **34**.

**Table S2.** Synthesis characteristics of the PEG-modified peptides **61-69**. aa = amino acid, (l) = long peptide, (s) = short peptide.

| #         | Peptides                  | aa | Cycles | time $t$ [h] | Steps | Yield [%] | Yield/step [%] |
|-----------|---------------------------|----|--------|--------------|-------|-----------|----------------|
| <b>61</b> | <i>FpvA</i> (l)<br>N-term | 20 | 23     | 55           | 23    | 11        | 91             |
| <b>62</b> | <i>PfeA</i> (l)<br>N-term | 20 | 27     | 60           | 23    | 21        | 93             |
| <b>63</b> | <i>HasR</i> (l)<br>N-term | 24 | 27     | 59           | 27    | 10        | 92             |
| <b>64</b> | <i>FpvA</i> (l)<br>C-term | 20 | 23     | 55           | 23    | 12        | 91             |
| <b>65</b> | <i>PfeA</i> (l)<br>C-term | 20 | 27     | 60           | 23    | 23        | 94             |
| <b>66</b> | <i>HasR</i> (l)<br>C-term | 24 | 27     | 59           | 27    | 12        | 92             |
| <b>67</b> | <i>FpvA</i> (s)<br>N-term | 12 | 15     | 42           | 14    | 24        | 90             |
| <b>68</b> | <i>PfeA</i> (s)<br>N-term | 11 | 18     | 46           | 13    | 33        | 92             |
| <b>69</b> | <i>HasR</i> (s)<br>N-term | 11 | 13     | 40           | 13    | 15        | 86             |

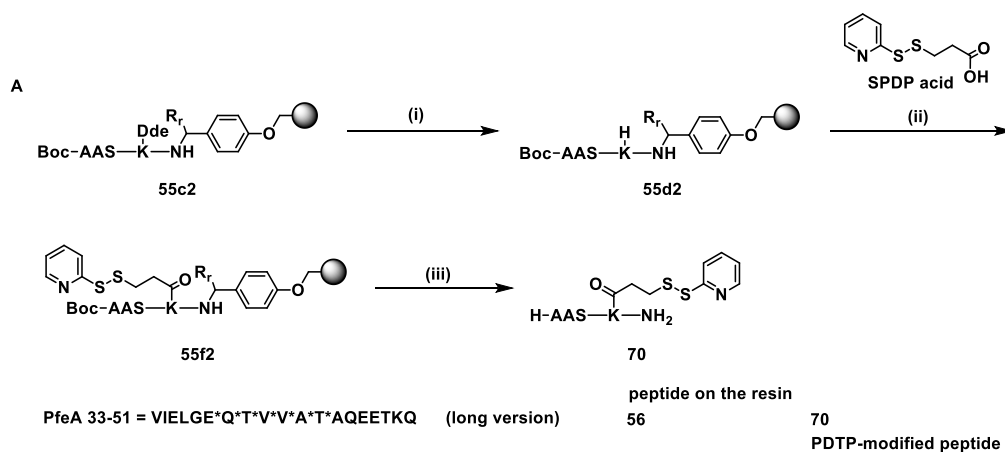

B

**Scheme S8:** (A) Synthesis of C-terminal PDTP-modified *Pfea* 33-51 peptide **70**. (i) 1.0 M hydrazine, in THF, DMF, 23 °C, 3 h, (ii) 3-(pyridin-2-yl-disulfaneyl)propanoic acid (SPDP acid), HOBt, HATU, NMM, DMF, 23 °C, 21 h, (iii) 95% TFA, 3% TIPS, 2% H<sub>2</sub>O, 23 °C, 3 h, over 23 steps 11%.

## Conjugate synthesis

**Table S3:** Overview over the yields of the peptide DOTAM siderophore conjugates **11-21** for the final CuAAC. l = long, s = short peptide.

| #  | Peptide         | Siderophore | Conjugation      | Yield [%] |
|----|-----------------|-------------|------------------|-----------|
| 11 | <i>FpvA</i> (l) | DOTAM-OH    | N-term PEG       | 91        |
| 12 | <i>PfeA</i> (l) | DOTAM-OH    | N-term PEG       | 99        |
| 13 | <i>HasR</i> (l) | DOTAM-OH    | N-term PEG       | 87        |
| 14 | <i>FpvA</i> (s) | DOTAM-OH    | N-term PEG       | 91        |
| 15 | <i>PfeA</i> (s) | DOTAM-OH    | N-term PEG       | 96        |
| 16 | <i>HasR</i> (s) | DOTAM-OH    | N-term PEG       | 81        |
| 17 | <i>FpvA</i> (l) | DOTAM-OH    | C-term PEG       | 94        |
| 18 | <i>PfeA</i> (l) | DOTAM-OH    | C-term PEG       | 99        |
| 19 | <i>HasR</i> (l) | DOTAM-OH    | C-term PEG       | 79        |
| 20 | <i>PfeA</i> (l) | DOTAM-OAc   | C-term PEG       | 82        |
| 21 | <i>PfeA</i> (l) | DOTAM-OH    | C-term disulfide | 76        |

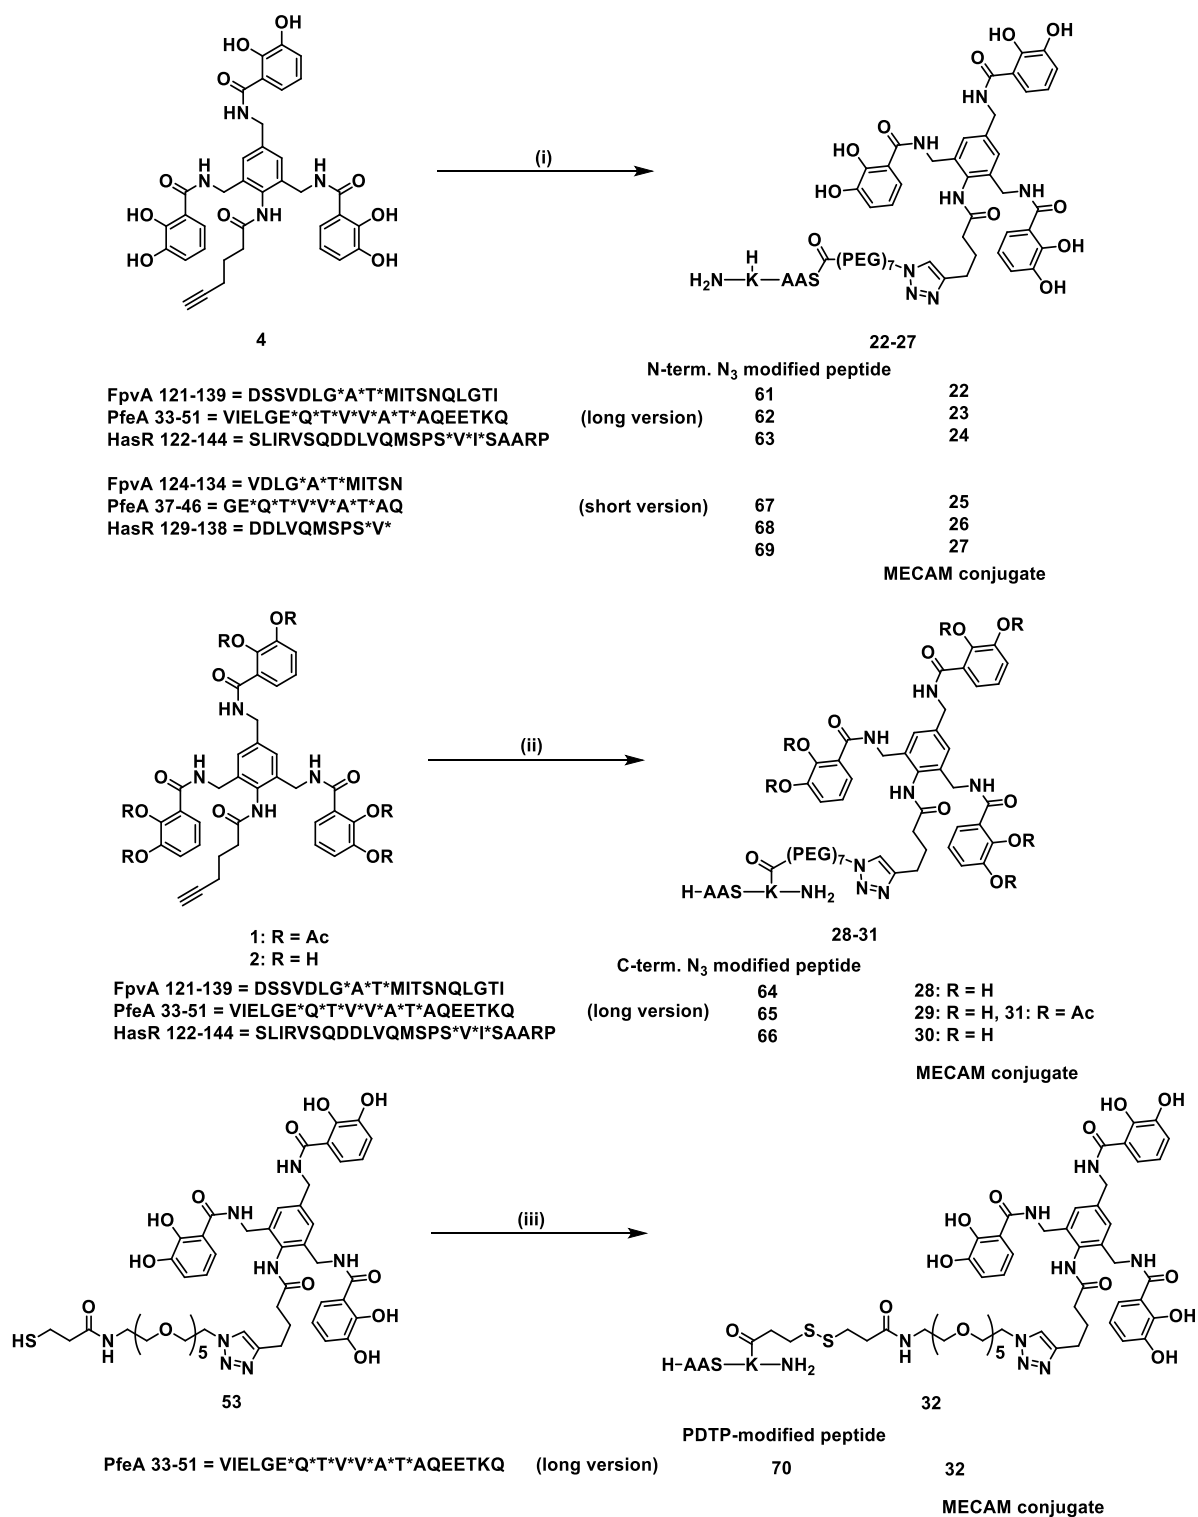

**Scheme S9:** Conjugation of the TonB box containing peptides to the MECAM siderophores. (i) **61/62/63/67/68/69**, DMSO, H<sub>2</sub>O, 23 °C, 5 min, CuSO<sub>4</sub>, sodium ascorbate, THPTA, PBS pH 7.4, 23 °C, 1 h, 86-97%, (ii) **64/65/66**, DMSO, H<sub>2</sub>O, 23 °C, 5 min, CuSO<sub>4</sub>, sodium ascorbate, THPTA, PBS pH 7.4, 23 °C, 1 h, 85-95%, (iii) **70**, HEPES buffer pH 7.4, DMF, DMSO, 23 °C, 48 h, 78%.\* indicates a complicated coupling.



**Table S4:** Overview over the yields of peptide MECAM siderophore conjugates **22-32** for the final CuAAC. l = long, s = short peptide.

| #  | Peptide         | Siderophore | Conjugation      | Yield [%] |
|----|-----------------|-------------|------------------|-----------|
| 22 | <i>FpvA</i> (l) | MECAM-OH    | N-term PEG       | 95        |
| 23 | <i>PfeA</i> (l) | MECAM-OH    | N-term PEG       | 97        |
| 24 | <i>HasR</i> (l) | MECAM-OH    | N-term PEG       | 86        |
| 25 | <i>FpvA</i> (s) | MECAM-OH    | N-term PEG       | 88        |
| 26 | <i>PfeA</i> (s) | MECAM-OH    | N-term PEG       | 96        |
| 27 | <i>HasR</i> (s) | MECAM-OH    | N-term PEG       | 86        |
| 28 | <i>FpvA</i> (l) | MECAM-OH    | C-term PEG       | 95        |
| 29 | <i>PfeA</i> (l) | MECAM-OH    | C-term PEG       | 96        |
| 30 | <i>HasR</i> (l) | MECAM-OH    | C-term PEG       | 85        |
| 31 | <i>PfeA</i> (l) | MECAM-OAc   | C-term PEG       | 80        |
| 32 | <i>PfeA</i> (l) | MECAM-OH    | C-term disulfide | 78        |

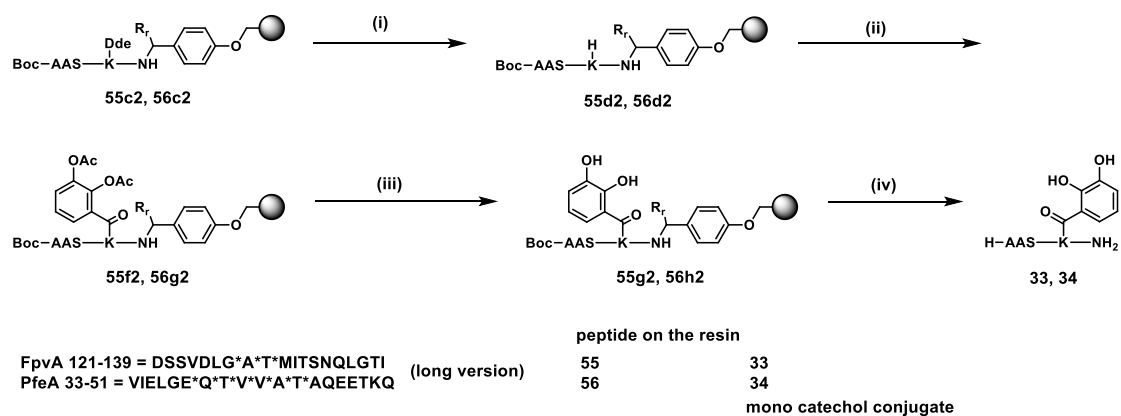

**Scheme S10:** Syntheses of C-terminal mono catechol-modified peptides **33** and **34**. (i) 1.0 M hydrazine in THF, DMF, 23 °C, 3 h, (ii) **40**, HOBt, HATU, NMM, DMF, 0-23 °C, 21 h, (iii) 20% DIPEA, MeOH, 0-23 °C, 4 h, (iv) 95% TFA, 3% TIPS, 2% H<sub>2</sub>O, 23 °C, 3 h, over 24 steps 9-15%.

**Table S5:** Comparison of yields of the mono catechol-modified peptides **33** and **34**. aa = amino acids, (l) = long peptide.

| #         | Peptides        | aa | Cycles | Time <i>t</i> [h] | Steps | Yield [%] | Yield/step [%] |
|-----------|-----------------|----|--------|-------------------|-------|-----------|----------------|
| <b>33</b> | <i>FpvA</i> (l) | 20 | 23     | 59                | 24    | 9         | 90             |
|           | C-term          |    |        |                   |       |           |                |
| <b>34</b> | <i>PfeA</i> (l) | 20 | 27     | 64                | 24    | 15        | 92             |
|           | C-term          |    |        |                   |       |           |                |



**Compound 45<sup>2,3</sup>**

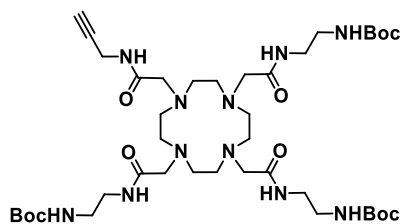

Chemical Formula:  $C_{40}H_{73}N_{11}O_{10}$   
Exact Mass: 867,5542  
Molecular Weight: 868,0910

**Compound 46<sup>2,3</sup>**

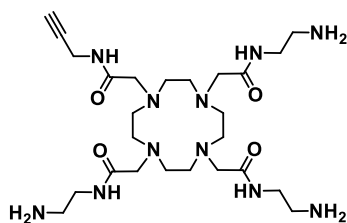

Chemical Formula:  $C_{25}H_{49}N_{11}O_4$   
Exact Mass: 567,3969  
Molecular Weight: 567,7400

**Compound 1<sup>2,3</sup>**

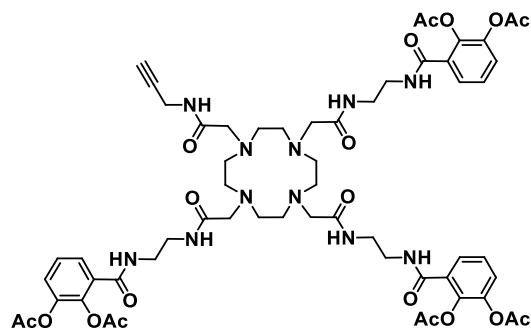

Chemical Formula:  $C_{58}H_{73}N_{11}O_{19}$   
Exact Mass: 1227,5084  
Molecular Weight: 1228,2800

**Compound 2<sup>2, 3</sup>**

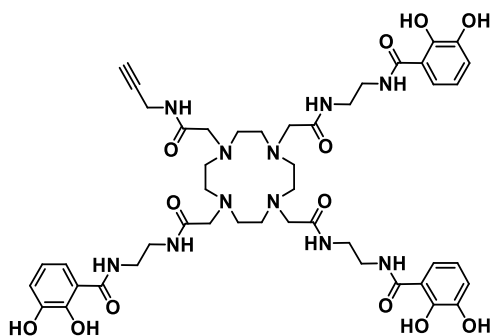

Chemical Formula:  $C_{46}H_{61}N_{11}O_{13}$   
Exact Mass: 975,4450  
Molecular Weight: 976,0580

**Compound 48<sup>6</sup>**

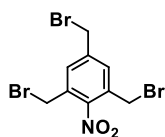

Chemical Formula:  $C_9H_8Br_3NO_2$   
Exact Mass: 398,8105  
Molecular Weight: 401,8800

**Compound 49<sup>6</sup>**

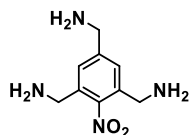

Chemical Formula:  $C_9H_{14}N_4O_2$   
Exact Mass: 210,1117  
Molecular Weight: 210,2370

**Compound 50<sup>6</sup>**

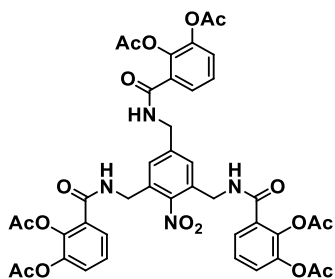

Chemical Formula:  $C_{42}H_{38}N_4O_{17}$   
Exact Mass: 870,2232  
Molecular Weight: 870,7770

### Compound 51<sup>6</sup>

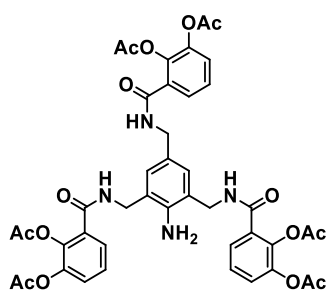

Chemical Formula: C<sub>42</sub>H<sub>40</sub>N<sub>4</sub>O<sub>15</sub>  
Exact Mass: 840,2490  
Molecular Weight: 840,7950

### Compound 3<sup>6</sup>

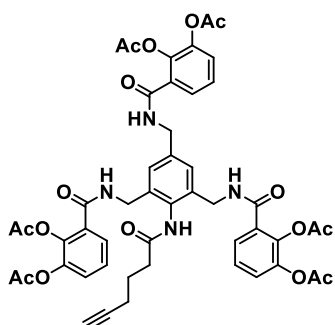

Chemical Formula: C<sub>48</sub>H<sub>46</sub>N<sub>4</sub>O<sub>16</sub>  
Exact Mass: 934,2909  
Molecular Weight: 934,9080

### Compound 4<sup>6</sup>

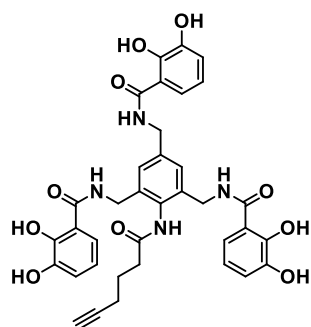

Chemical Formula: C<sub>36</sub>H<sub>34</sub>N<sub>4</sub>O<sub>10</sub>  
Exact Mass: 682,2275  
Molecular Weight: 682,6860

### Compound 52a

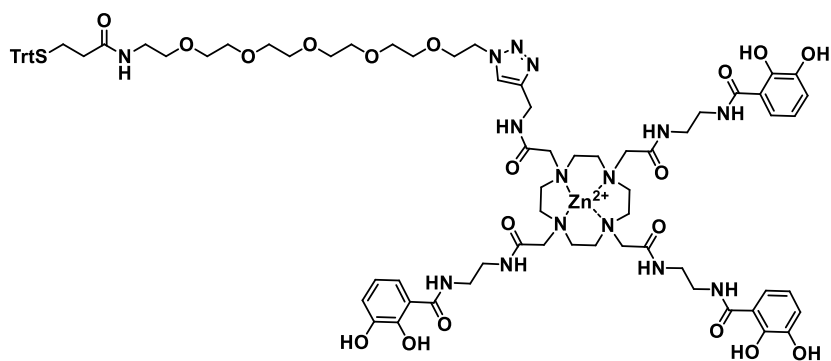

Chemical Formula:  $C_{80}H_{105}N_{15}O_{19}SZn^{2+}$

Exact Mass: 1675,6712

Molecular Weight: 1678,2449

### Compound 52

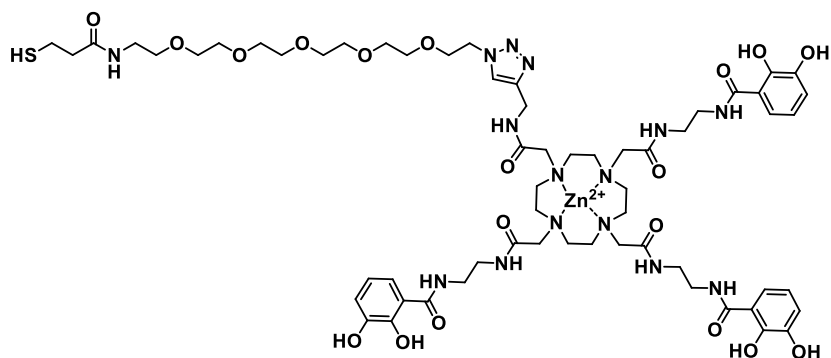

Chemical Formula:  $C_{61}H_{91}N_{15}O_{19}SZn^{2+}$

Exact Mass: 1433,5617

Molecular Weight: 1435,9239

### Compound 53a

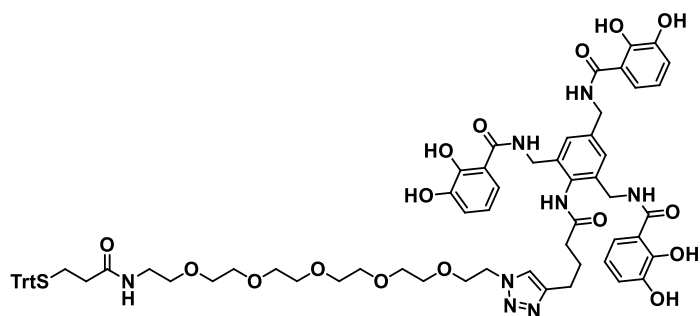

Chemical Formula:  $C_{70}H_{78}N_8O_{16}S$

Exact Mass: 1318,5256

Molecular Weight: 1319,4940

## Compound 53

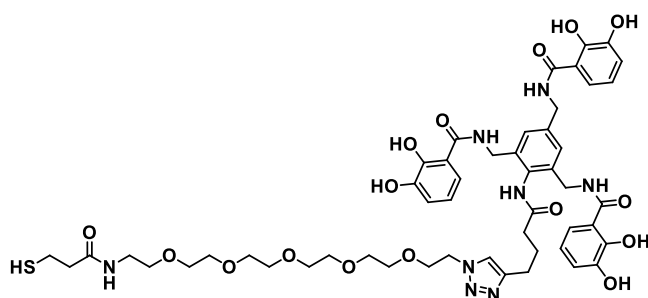

Chemical Formula:  $C_{51}H_{64}N_8O_{16}S$   
Exact Mass: 1076,4161  
Molecular Weight: 1077,1730

## FpvA 121-139 peptide 5

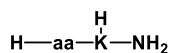

aa: DSSVDLG\*A\*T\*MITSNQLGTI

Chemical Formula:  $C_{85}H_{148}N_{24}O_{32}S$   
Exact Mass: 2049,04122  
Molecular Weight: 2050,31500

## PfeA 33-51 peptide 6

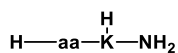

aa: VIELGE\*Q\*T\*V\*V\*A\*T\*AQEETKQ

Chemical Formula:  $C_{94}H_{162}N_{26}O_{34}$   
Exact Mass: 2199,17468  
Molecular Weight: 2200,47800

## HasR 122-144 peptide 7

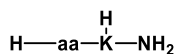

aa: SLIRVSQDDLVMSPS\*V\*I\*SAARP

Chemical Formula:  $C_{111}H_{194}N_{34}O_{35}S$   
Exact Mass: 2595,41665  
Molecular Weight: 2597,03600

## FpvA 124-134 peptide 8

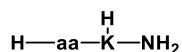

aa: VDLG\*A\*T\*MITSN

Chemical Formula:  $C_{52}H_{93}N_{15}O_{18}S$   
Exact Mass: 1247,65437  
Molecular Weight: 1248,46300





### Compound 64

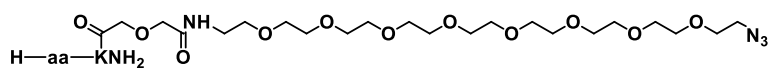

aa: DSSVDLG\*A\*T\*MITSNQLGTI  
Chemical Formula: C<sub>107</sub>H<sub>188</sub>N<sub>28</sub>O<sub>43</sub>S  
Exact Mass: 2585,31058  
Molecular Weight: 2586,89400

### Compound 65

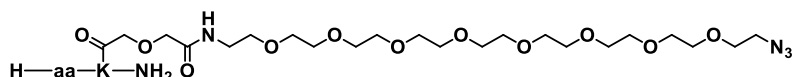

aa: VIELGE\*Q\*T\*V\*V\*A\*T\*AQEETKQ  
Chemical Formula: C<sub>116</sub>H<sub>202</sub>N<sub>30</sub>O<sub>45</sub>  
Exact Mass: 2735,44403  
Molecular Weight: 2737,05700

### Compound 66

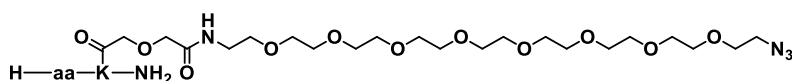

aa: SLIRVSQDDLQMSPS\*V\*I\*SAARP  
Chemical Formula: C<sub>133</sub>H<sub>234</sub>N<sub>38</sub>O<sub>46</sub>S  
Exact Mass: 3131,68601  
Molecular Weight: 3133,61500

### Compound 67

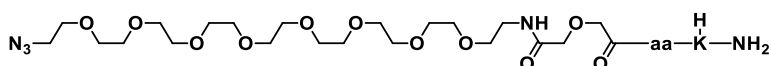

aa: VDLG\*A\*T\*MITSN  
Chemical Formula: C<sub>74</sub>H<sub>133</sub>N<sub>19</sub>O<sub>29</sub>S  
Exact Mass: 1783,92373  
Molecular Weight: 1785,04200

### Compound 68

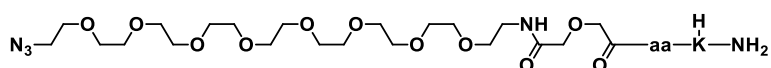

aa: GE\*Q\*T\*V\*V\*A\*T\*AQ  
Chemical Formula: C<sub>69</sub>H<sub>123</sub>N<sub>19</sub>O<sub>28</sub>  
Exact Mass: 1665,87849  
Molecular Weight: 1666,84800

## Compound 69

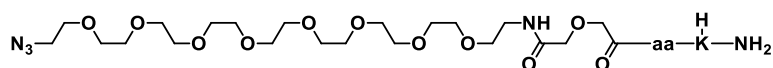

aa: DDLVQMSPS\*V\*

Chemical Formula:  $C_{73}H_{128}N_{18}O_{29}S$

Exact Mass: 1752,88153

Molecular Weight: 1753,98400

## Compound 70

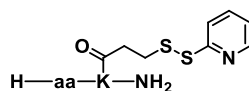

aa: VIELGE\*Q\*T\*V\*V\*A\*T\*AQEETKQ

Chemical Formula:  $C_{102}H_{169}N_{27}O_{35}S_2$

Exact Mass: 2396,17158

Molecular Weight: 2397,74800

## Compound C33

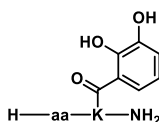

aa: DSSVDLG\*A\*T\*MITSNQLGTI

Chemical Formula:  $C_{92}H_{152}N_{24}O_{35}S$

Exact Mass: 2185,05726

Molecular Weight: 2186,42100

## Compound C34

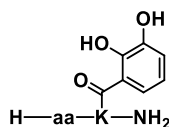

aa: VIELGE\*Q\*T\*V\*V\*A\*T\*AQEETKQ

Chemical Formula:  $C_{101}H_{166}N_{26}O_{37}$

Exact Mass: 2335,19072

Molecular Weight: 2336,58400

## Compound N33L

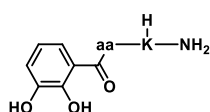

aa: DSSVDLG\*A\*T\*MITSNQLGTI

Chemical Formula:  $C_{92}H_{152}N_{24}O_{35}S$

Exact Mass: 2185,05726

Molecular Weight: 2186,42100

### Compound N34<sub>L</sub>

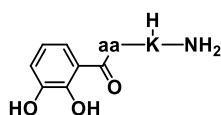

aa: VIELGE\*Q\*T\*V\*V\*A\*T\*AQEETKQ

Chemical Formula: C<sub>101</sub>H<sub>166</sub>N<sub>26</sub>O<sub>37</sub>

Exact Mass: 2335,19072

Molecular Weight: 2336,58400

### Compound N33<sub>D</sub>

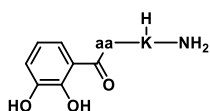

aa: DSSVDLG\*A\*T\*MITSNQLGTI  
D-amino acids

Chemical Formula: C<sub>92</sub>H<sub>152</sub>N<sub>24</sub>O<sub>35</sub>S

Exact Mass: 2185,05726

Molecular Weight: 2186,42100

### Compound N34<sub>D</sub>

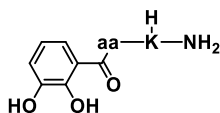

aa: VIELGE\*Q\*T\*V\*V\*A\*T\*AQEETKQ  
D-amino acids

Chemical Formula: C<sub>101</sub>H<sub>166</sub>N<sub>26</sub>O<sub>37</sub>

Exact Mass: 2335,19072

Molecular Weight: 2336,58400

### Compound 11 (FpVA 121-139 N-term (PEG)<sub>7</sub>-Zn<sup>2+</sup>-DOTAM)

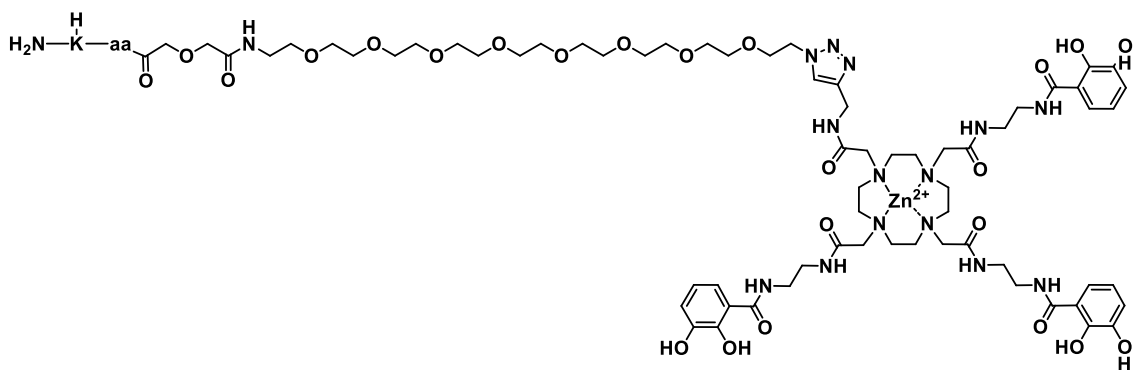

aa: DSSVDLG\*A\*T\*MITSNQLGTI

Chemical Formula: C<sub>153</sub>H<sub>249</sub>N<sub>39</sub>O<sub>56</sub>SZn<sup>2+</sup>

Exact Mass: 3624,68366

Molecular Weight: 3628,33090

**Compound 12 (*PfeA* 33-51 N-term (PEG)<sub>7</sub>-Zn<sup>2+</sup>-DOTAM)**

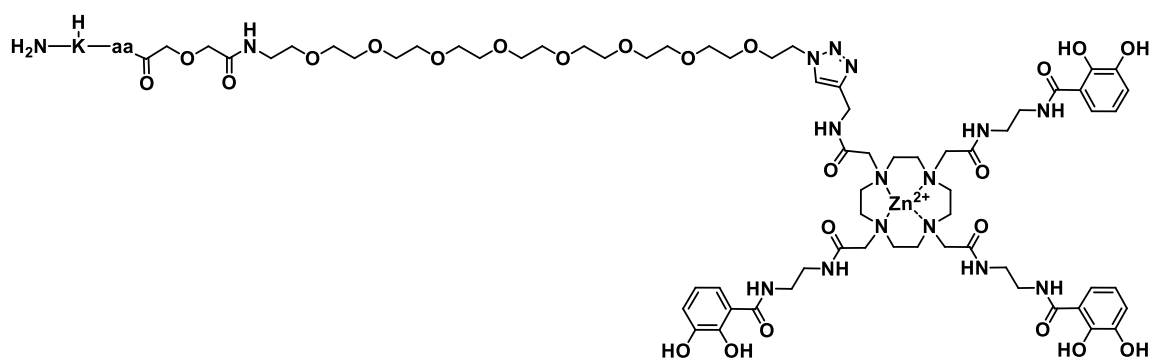

aa: VIELGE\*Q\*T\*V\*V\*A\*T\*AQEETKQ  
Chemical Formula: C<sub>162</sub>H<sub>263</sub>N<sub>41</sub>O<sub>58</sub>Zn<sup>2+</sup>  
Exact Mass: 3774,81712  
Molecular Weight: 3778,49390

**Compound 13 (*HasR* 122-144 N-term (PEG)<sub>7</sub>-Zn<sup>2+</sup>-DOTAM)**

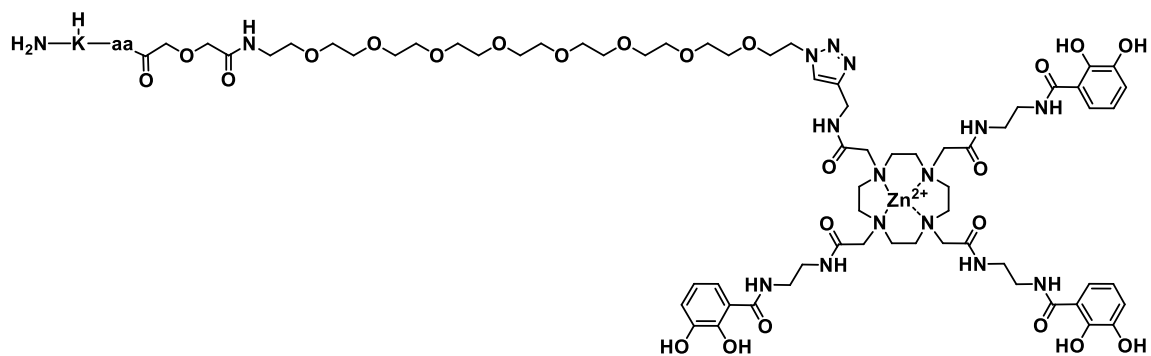

aa: SLIRVSQDDLVMSPS\*V\*I\*SAARP

Chemical Formula: C<sub>179</sub>H<sub>295</sub>N<sub>49</sub>O<sub>59</sub>SZn<sup>2+</sup>  
Exact Mass: 4171,05909  
Molecular Weight: 4175,05190

**Compound 14 (FpvA 124-134 N-term (PEG)<sub>7</sub>-Zn<sup>2+</sup>-DOTAM)**

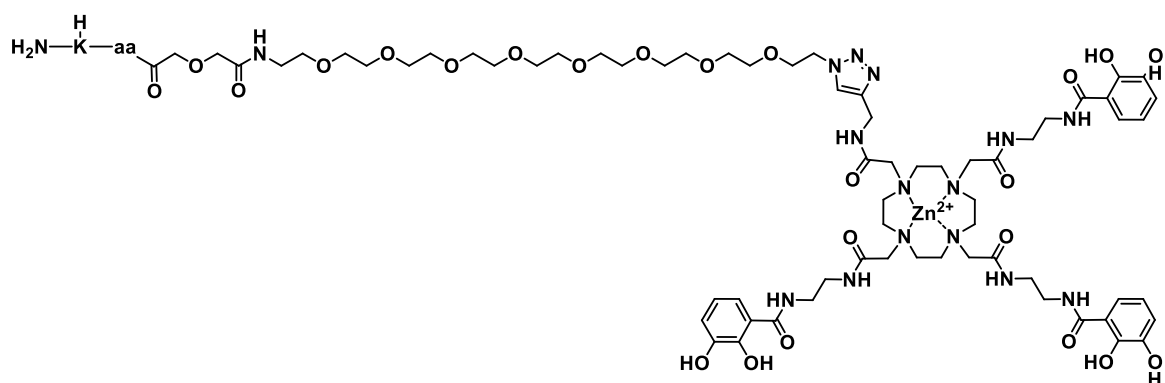

aa: VDLG<sup>+</sup>A<sup>+</sup>T<sup>+</sup>MITSN

Chemical Formula: C<sub>120</sub>H<sub>194</sub>N<sub>30</sub>O<sub>42</sub>SZn<sup>2+</sup>

Exact Mass: 2823,29681

Molecular Weight: 2826,47890

**Compound 15 (PfeA 37-46 N-term (PEG)<sub>7</sub>-Zn<sup>2+</sup>-DOTAM)**

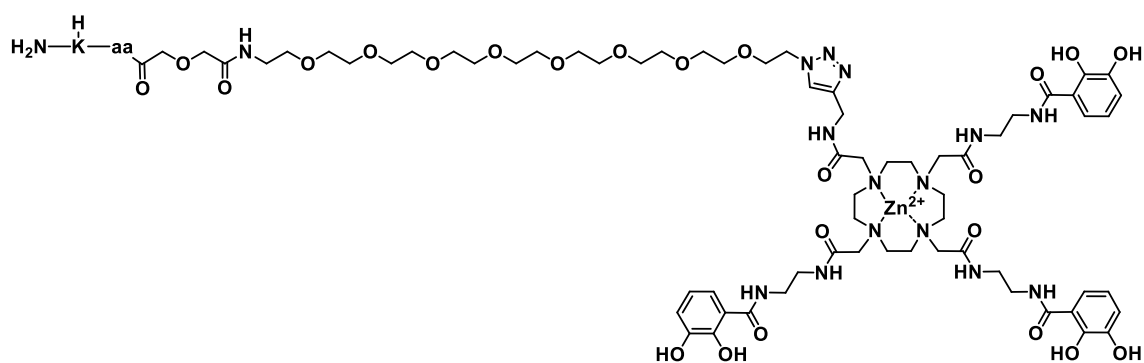

86

aa: GE<sup>+</sup>Q<sup>+</sup>T<sup>+</sup>V<sup>+</sup>V<sup>+</sup>A<sup>+</sup>T<sup>+</sup>AQ

Chemical Formula: C<sub>115</sub>H<sub>184</sub>N<sub>30</sub>O<sub>41</sub>Zn<sup>2+</sup>

Exact Mass: 2705,25158

Molecular Weight: 2708,28490

**Compound 16 (*HasR* 129-138 N-term (PEG)<sub>7</sub>-Zn<sup>2+</sup>-DOTAM)**

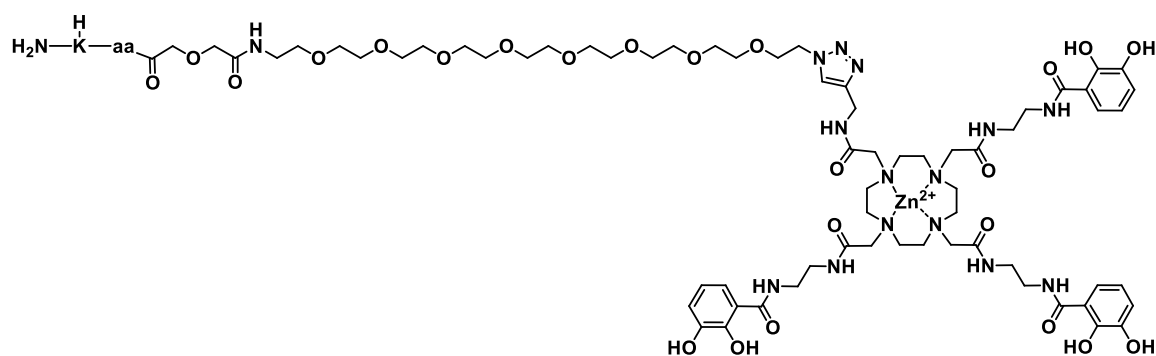

aa: DDLVQMSPS\*V\*

Chemical Formula: C<sub>119</sub>H<sub>189</sub>N<sub>29</sub>O<sub>42</sub>SZn<sup>2+</sup>

Exact Mass: 2792,25461

Molecular Weight: 2795,42090

**Compound 17 (*FpvA* 121-139 C-term (PEG)<sub>7</sub>-Zn<sup>2+</sup>-DOTAM)**

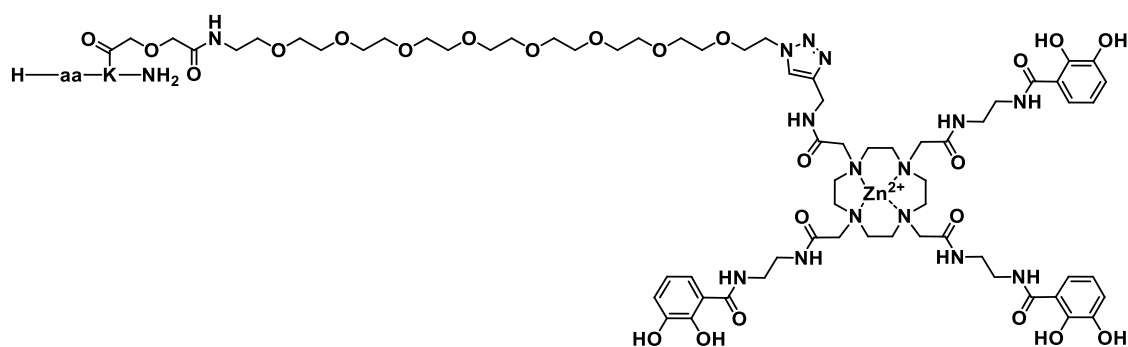

aa: DSSVDLG\*A\*T\*MITSNQLGTI

Chemical Formula: C<sub>153</sub>H<sub>249</sub>N<sub>39</sub>O<sub>56</sub>SZn<sup>2+</sup>

Exact Mass: 3624,68366

Molecular Weight: 3628,33090

**Compound 18 (*PfeA* 33-51 C-term (PEG)<sub>7</sub>-Zn<sup>2+</sup>-DOTAM)**

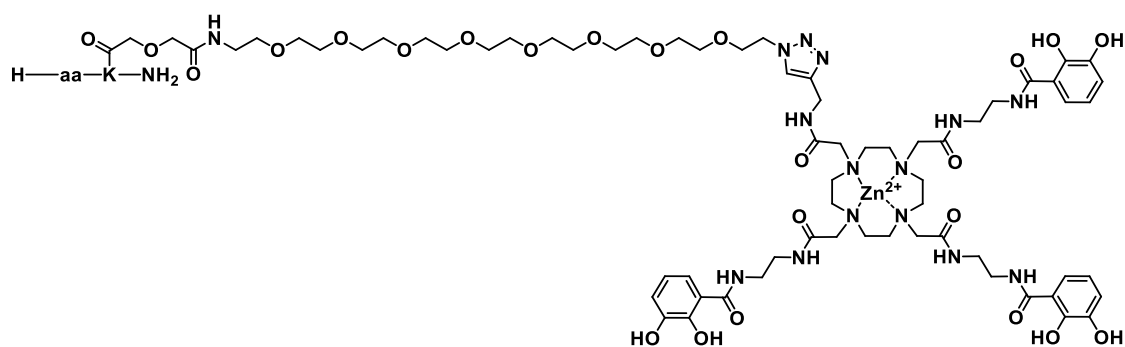

aa: VIELGE\*Q\*T\*V\*V\*A\*T\*AQEETKQ

Chemical Formula: C<sub>162</sub>H<sub>263</sub>N<sub>41</sub>O<sub>58</sub>Zn<sup>2+</sup>

Exact Mass: 3774,81712

Molecular Weight: 3778,49390

**Compound 19 (*HasR* 122-144 C-term (PEG)<sub>7</sub>-Zn<sup>2+</sup>-DOTAM)**

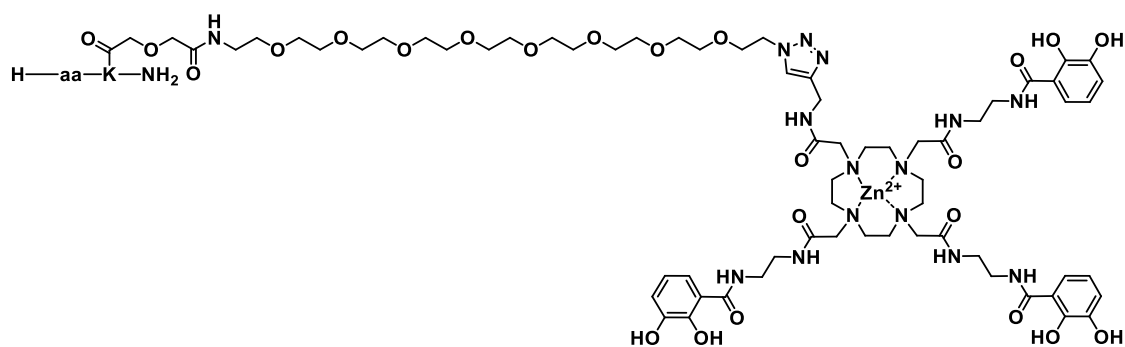

aa: SLIRVSQDDLVMSPS\*V\*I\*SAARP

Chemical Formula: C<sub>179</sub>H<sub>295</sub>N<sub>49</sub>O<sub>59</sub>SZn<sup>2+</sup>

Exact Mass: 4171,05909

Molecular Weight: 4175,05190



**Compound 20 (PfeA 33-51 C-term (PEG)<sub>7</sub>-Zn<sup>2+</sup>-DOTAM-OAc)**

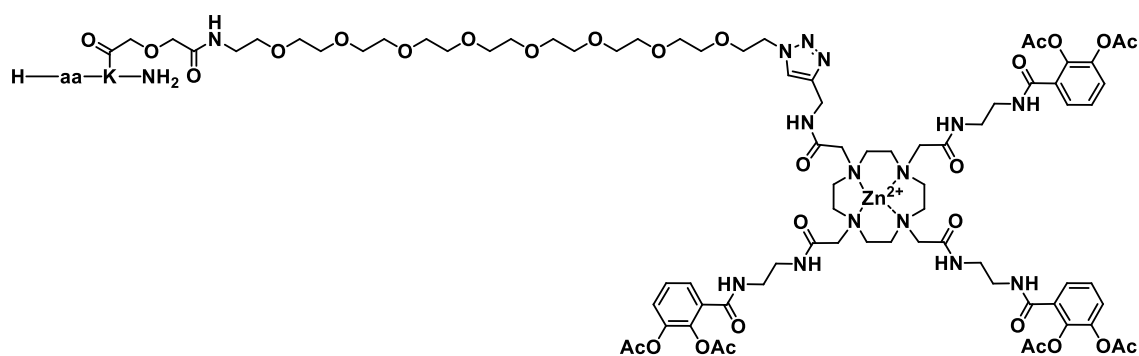

aa: VIELGE\*Q\*T\*V\*V\*A\*T\*AQEETKQ

Chemical Formula: C<sub>174</sub>H<sub>275</sub>N<sub>41</sub>O<sub>64</sub>Zn<sup>2+</sup>

Exact Mass: 4026,88050

Molecular Weight: 4030,71590

**Compound 21 (PfeA 33-51 C-term disulfide-(PEG)<sub>5</sub>-Zn<sup>2+</sup>-DOTAM)**

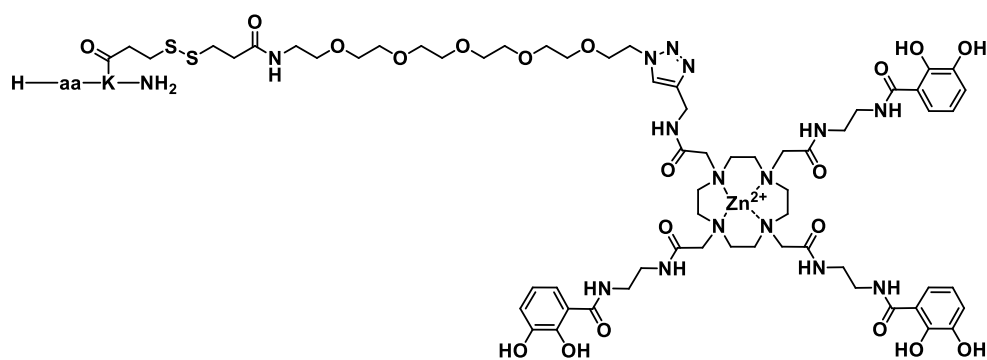

aa: VIELGE\*Q\*T\*V\*V\*A\*T\*AQEETKQ

Chemical Formula: C<sub>158</sub>H<sub>255</sub>N<sub>41</sub>O<sub>54</sub>S<sub>2</sub>Zn<sup>2+</sup>

Exact Mass: 3718,71900

Molecular Weight: 3722,50990

**Compound 22 (FpvA 121-139 N-term-(PEG)<sub>7</sub>-MECAM)**

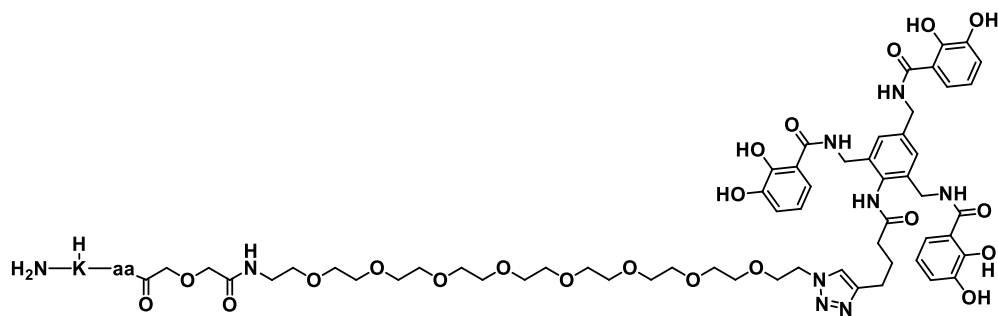

aa: DSSVDLG\*A\*T\*MITSNQLGTI

Chemical Formula: C<sub>143</sub>H<sub>222</sub>N<sub>32</sub>O<sub>53</sub>S

Exact Mass: 3267,53807

Molecular Weight: 3269,58000

**Compound 23 (*PfeA* 33-51 N-term (PEG)<sub>7</sub>-MECAM)**

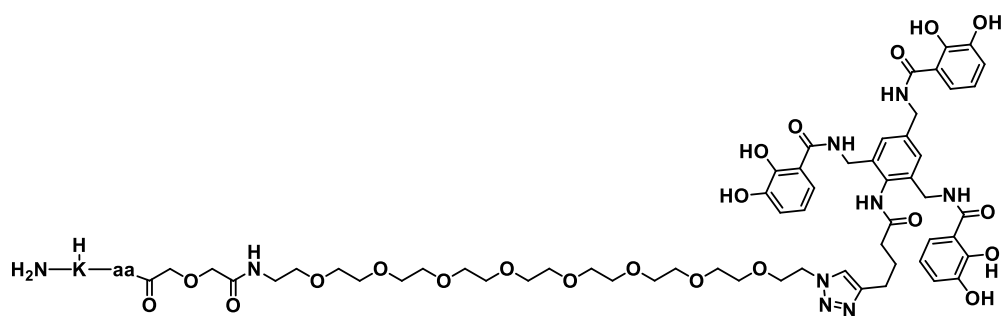

aa: VIELGE\*Q\*T\*V\*V\*A\*T\*AQEETKQ

Chemical Formula: C<sub>152</sub>H<sub>236</sub>N<sub>34</sub>O<sub>55</sub>

Exact Mass: 3417,67153

Molecular Weight: 3419,74300

**Compound 24 (*HasR* 122-144 N-term (PEG)<sub>7</sub>-MECAM)**

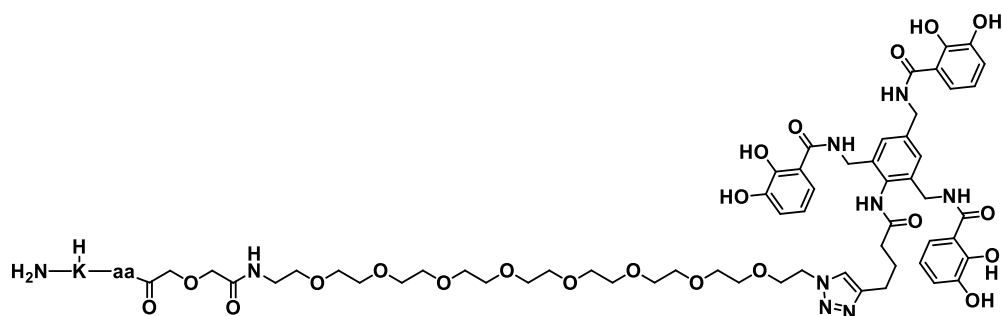

aa: SLIRVSQDDLVMSPS\*V\*I\*SAARP

Chemical Formula: C<sub>169</sub>H<sub>268</sub>N<sub>42</sub>O<sub>56</sub>S

Exact Mass: 3813,91351

Molecular Weight: 3816,30100

**Compound 25 (*FpvA* 124-134 N-term (PEG)<sub>7</sub>-MECAM)**

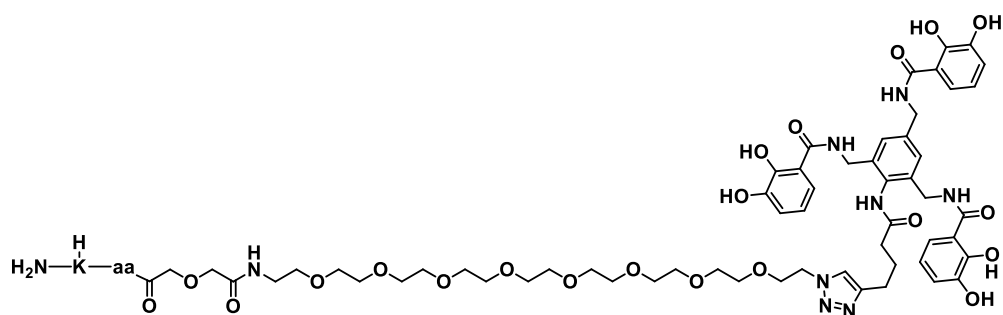

aa: VDLG\*A\*T\*MITSN

Chemical Formula: C<sub>110</sub>H<sub>167</sub>N<sub>23</sub>O<sub>39</sub>S

Exact Mass: 2466,15122

Molecular Weight: 2467,72800

**Compound 26 (PfeA 37-46 N-term (PEG)<sub>7</sub>-MECAM)**

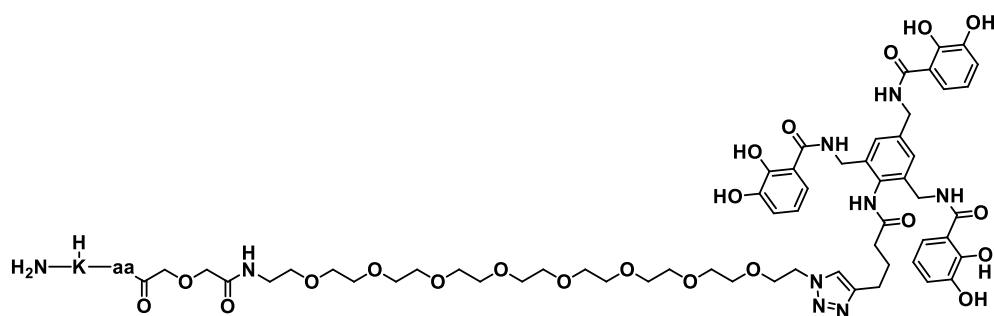

aa: GE\*Q\*T\*V\*V\*A\*T\*AQ

Chemical Formula: C<sub>105</sub>H<sub>157</sub>N<sub>23</sub>O<sub>38</sub>

Exact Mass: 2348,10599

Molecular Weight: 2349,53400

**Compound 27 (HasR 129-138 N-term (PEG)<sub>7</sub>-MECAM)**

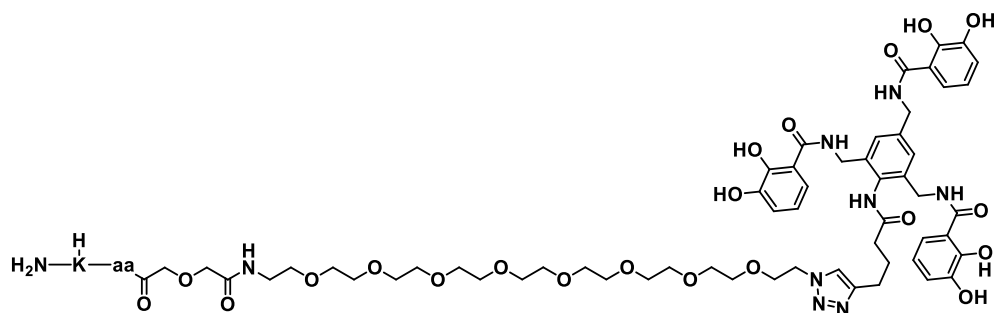

aa: DDLVQMSPS\*V\*

Chemical Formula: C<sub>109</sub>H<sub>162</sub>N<sub>22</sub>O<sub>39</sub>S

Exact Mass: 2435,10902

Molecular Weight: 2436,67000

**Compound 28 (FpvA 121-139 C-term (PEG)<sub>7</sub>-MECAM)**

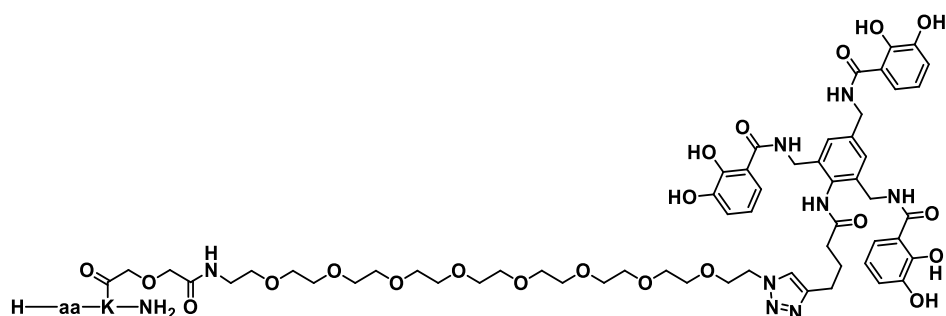

aa: DSSVDLG\*A\*T\*MITSNQLGTI

Chemical Formula: C<sub>143</sub>H<sub>222</sub>N<sub>32</sub>O<sub>53</sub>S

Exact Mass: 3267,53807

Molecular Weight: 3269,58000

**Compound 29 (*PfeA* 33-51 C-term (PEG)<sub>7</sub>-MECAM)**

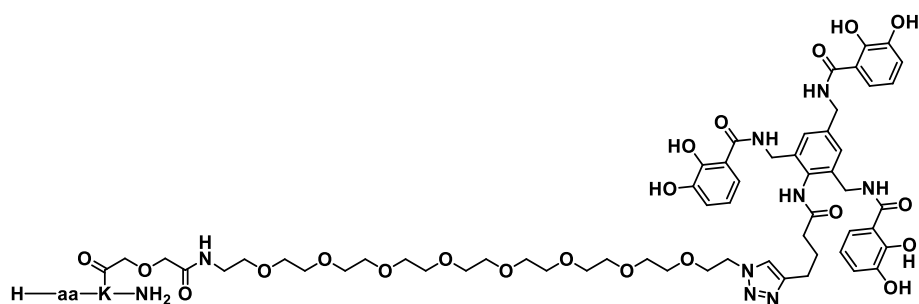

aa: VIELGE\*Q\*T\*V\*V\*A\*T\*AQEETKQ

Chemical Formula: C<sub>152</sub>H<sub>236</sub>N<sub>34</sub>O<sub>55</sub>

Exact Mass: 3417,67153

Molecular Weight: 3419,74300

**Compound 30 (*HasR* 122-144 C-term (PEG)<sub>7</sub>-MECAM)**

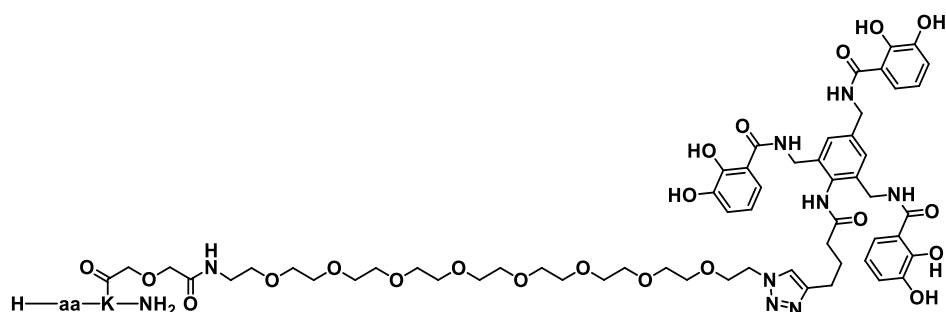

aa: SLIRVSQDDLVMSPS\*V\*I\*SAARP

Chemical Formula: C<sub>169</sub>H<sub>268</sub>N<sub>42</sub>O<sub>56</sub>S

Exact Mass: 3813,91351

Molecular Weight: 3816,30100

**Compound 31 (PfeA 33-51 C-term (PEG)<sub>7</sub>-MECAM-OAc)**

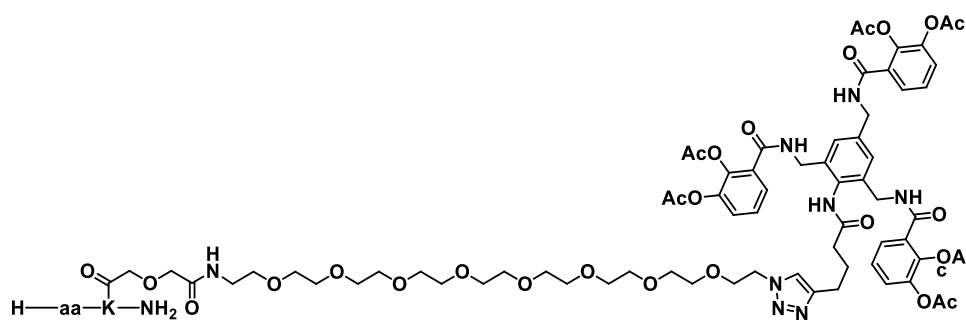

aa: VIELGE\*Q\*T\*V\*V\*A\*T\*AQEETKQ

Chemical Formula: C<sub>164</sub>H<sub>248</sub>N<sub>34</sub>O<sub>61</sub>

Exact Mass: 3669,73492

Molecular Weight: 3671,96500

**Compound 32 (PfeA 33-51 C-term disulfide-(PEG)<sub>5</sub>-MECAM)**

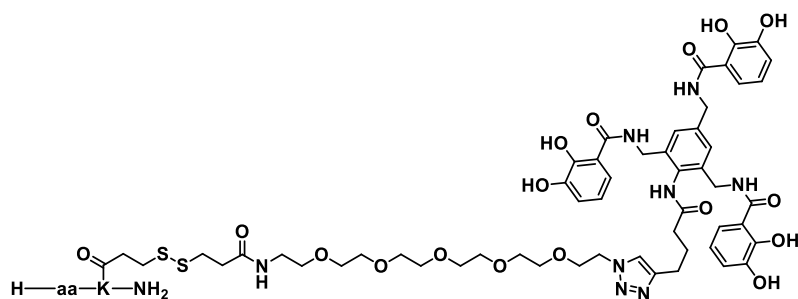

aa: VIELGE\*Q\*T\*V\*V\*A\*T\*AQEETKQ

Chemical Formula: C<sub>148</sub>H<sub>228</sub>N<sub>34</sub>O<sub>51</sub>S<sub>2</sub>

Exact Mass: 3361,57341

Molecular Weight: 3363,75900

## Supplementary biological information

### Literature information on *P. aeruginosa*'s TBDTs

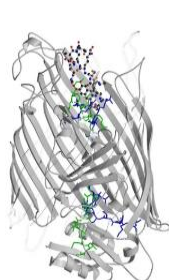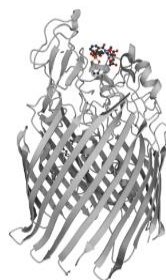

no crystal structure

**FpvA**

**PfeA**

**HasR**

|                                  | <b>FpvA</b>                                                | <b>PfeA</b>                                              | <b>HasR</b>                                                    |
|----------------------------------|------------------------------------------------------------|----------------------------------------------------------|----------------------------------------------------------------|
| <b>Name</b>                      | Ferripyoverdine receptor                                   | Ferric enterobactin receptor                             | Heme assimilation system receptor                              |
| <b>UniProt #</b>                 | P48632<br>(FPVA_PSEAE)                                     | Q05098<br>(PFEA_PSEAE)                                   | Q9HYJ7<br>(Q9HYJ7_PSEAE)                                       |
| <b>Genome DB tag</b>             | PA2398 (fpvA)                                              | PA2688 (pfeA)                                            | PA3408 (hasR)                                                  |
| <b>Gene</b>                      | <i>fpvA</i>                                                | <i>pfeA</i>                                              | <i>hasR</i>                                                    |
| <b>MW [kDa]</b>                  | 91.2                                                       | 81.0                                                     | 97.9                                                           |
| <b>Location</b>                  | OM                                                         | OM                                                       | OM                                                             |
| <b>Organism</b>                  | PAO1 DSM 22644                                             | PAO1 DSM 22644                                           | PAO1 DSM 22644                                                 |
| <b>Induction</b>                 | pyoverdine, under iron starvation conditions               | enterobactin, iron                                       | -                                                              |
| <b>TonB box &amp; framing aa</b> | <sup>121</sup> DSSV <b>DLGATMITSN</b> QLGTI <sup>139</sup> | <sup>33</sup> VIELGE <b>QTVVATAQ</b> EETKQ <sup>51</sup> | <sup>122</sup> SLIRVSQD <b>DLVQMSPSV</b> ISAARP <sup>144</sup> |

**Figure S1:** (Top) Crystal structures of *FpvA*-PYO-Fe (PDB 2W6T) and *PfeA*-ENT-Fe (PDB 5M9B) of *P. aeruginosa*, no crystal structure determined for *HasR*.<sup>7 8</sup> (Bottom) Summary on the three selected OMRs *FpvA*, *PfeA* and *HasR* regarding their name, UniProt accession numbers, Genome DB tag, gene, MW = molecular weight [kDa], location = outer membrane (OM), organism, induction of TBDT expression, the TonB box and framing amino acid (aa) sequences.



## **Biology methods**

### **Fe-Chrome Azurol S (CAS) assay**

The Fe-chrome azurol S (FeCAS) assay was conducted following a known procedure.<sup>15, 2</sup> All glassware needed for the assay was cleaned with concentrated hydrochloric acid and milliQ water. Water and aqueous solutions of iron(III) chloride (1 mM in 10 mM HCl, 150  $\mu$ L) and Chrome Azurol S (50  $\mu$ L, CAS) were added to an aqueous solution of hexadecyltrimethylammonium bromide (600  $\mu$ L HDTMA 10 mM). A buffer solution consisting of piperazine (431 mg, 5 mmol) and concentrated hydrochloric acid (625  $\mu$ L) in water (5 mL) was added. The resulting solution was diluted with dH<sub>2</sub>O to a total volume of 10 mL. The stock solution used for the assay was generated by further addition of 5-sulfosalicylic acid dihydrate (10.2 mg, 40  $\mu$ mol). Solutions of the test compounds (15  $\mu$ M, 120  $\mu$ L each), as well as water (40  $\mu$ L) were added to 40  $\mu$ L of stock solution. The assay was conducted in technical triplicates in transparent, untreated 96-well plates. Absorbance from 300 to 800 nm was determined after 17 h using a plate reader, the curves were plotted and evaluated using Microsoft Excel 2016 and GraphPad Prism 9.



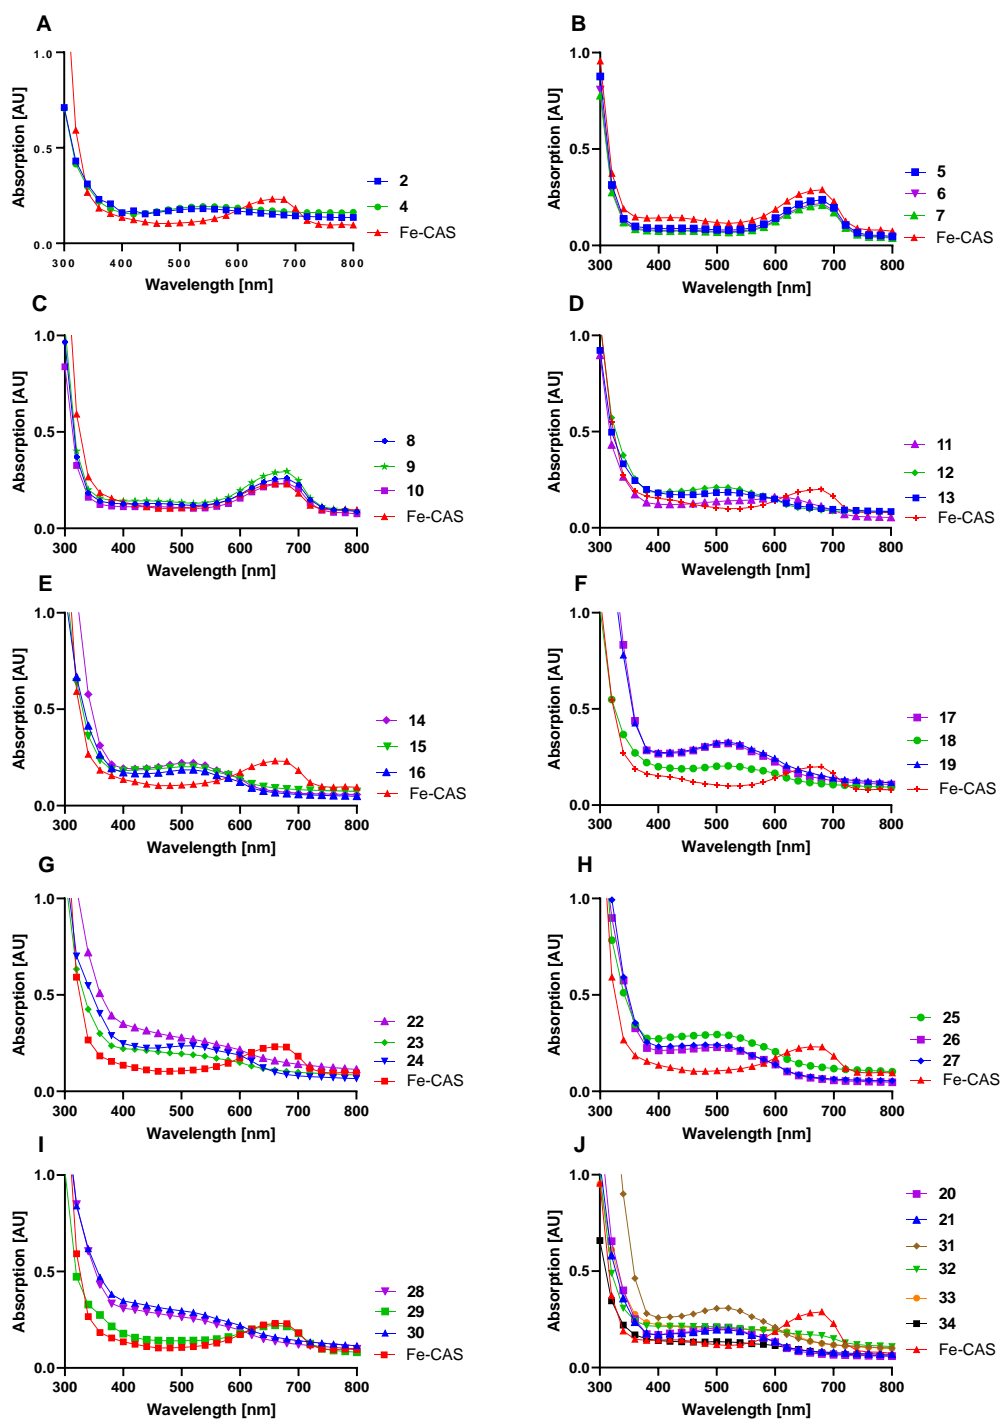

**Figure S3:** Absorbance spectra from 300-800 nm of Fe-CAS, the free unmodified TonB box peptides **5-10** and siderophore conjugates **11-34** upon incubation with the Fe-CAS complex for 17 hours. **(A)** DOTAM **2** and MECAM **4** **(B)** long, free peptides **5-7**, **(C)** short, free peptides **8-10**, **(D)** long, *N*-term. DOTAM conjugates **11-13**, **(E)** short, *N*-term. DOTAM conjugates **14-16**, **(F)** long *C*-term. DOTAM conjugates **17-18**, **(G)** long, *N*-term. MECAM conjugates **22-24**, **(H)** short, *N*-term. MECAM conjugates **25-27**, **(I)** long, *C*-term. MECAM conjugates **28-30**, **(J)** special conjugates **20, 21, 31-34**. All plots with a FeCAS reference curve, ( $n = 3$ ).

**Table S7:** Iron-binding capability measured by the Fe-CAS assay and antimicrobial activity in mutant *P. aeruginosa* strains.

| #  | Name            | Fe-CAS result |
|----|-----------------|---------------|
| 2  | DOTAM           | P             |
| 4  | MECAM           | P             |
| 5  | FpvA (l)        | N             |
| 6  | PfeA (l)        | N             |
| 7  | HasR (l)        | N             |
| 8  | FpvA (s)        | N             |
| 9  | PfeA (s)        | N             |
| 10 | HasR (s)        | N             |
| 11 | FpvA (l)-N-D    | P             |
| 12 | PfeA (l)-N-D    | P             |
| 13 | HasR (l)-N- D   | P             |
| 14 | FpvA (s)-N-D    | P             |
| 15 | PfeA (s)-N-D    | P             |
| 16 | HasR (s)-N- D   | P             |
| 17 | FpvA (l)-C-D    | P             |
| 18 | PfeA (l)-C-D    | P             |
| 19 | HasR (l)-C-D    | P             |
| 20 | PfeA (l)-C-D-Ac | P             |
| 21 | PfeA (l)-DS-C-D | P             |
| 22 | FpvA (l)-N-M    | P             |
| 23 | PfeA (l)-N-M    | P             |
| 24 | HasR (l)-N-M    | P             |
| 25 | FpvA (s)-N-M    | P             |
| 26 | PfeA (s)-N-M    | P             |
| 27 | HasR (s)-N- M   | P             |
| 28 | FpvA (l)-C-M    | P             |
| 29 | PfeA (l)-C-M    | P             |
| 30 | HasR (l)-C-M    | P             |
| 31 | PfeA (l)-C-M-Ac | P             |
| 32 | PfeA (l)-DS-C-M | P             |
| 33 | FpvA-C-catechol | P             |
| 34 | PfeA-C-catechol | P             |

P = positive FeCAS result, absorbance shift (blue to red), N = negative. (l) = long, (s) = short, D = DOTAM and M = MECAM, Ac = acetyl, DS = disulfide.

## **Antimicrobial susceptibility assays**

The *P. aeruginosa* strains used in this study are listed in Table S1. Evaluation of the different compounds activities was carried out in the iron-deficient CAA medium (casamino acid medium, composition: 5 g l<sup>-1</sup> low-iron CAA (Difco), 1.46 g l<sup>-1</sup> K<sub>2</sub>HPO<sub>4</sub> 3H<sub>2</sub>O, 0.25 g l<sup>-1</sup> MgSO<sub>4</sub> 7H<sub>2</sub>O) using the two-fold serial dilution method with an inoculum of 10<sup>5</sup> bacteria per mL. *P. aeruginosa*  $\Delta pvdF\Delta pchA$  strains were first grown overnight at 37 °C in LB broth, then washed and resuspended in CAA medium. The strains were grown for two successive overnight cultures at 30 °C in iron-deficient CAA medium, with a dilution of the cells of 1/10. Data were reported as MIC, which reflects the lowest concentration of antibiotic or test compound that inhibits the visible cell growth after a 24 h or 48 h incubation at 30 °C.

## **RT-qPCR analysis in PAO1 wildtype and mutant strains**

qRT-PCR was used to follow specific gene transcription as previously described. Bacteria (PAO1 or  $\Delta pvdF\Delta pchA$ ) were grown in CAA medium and in 50 mL Falcons, for 8 h, at 30 °C, in the presence or absence of 10  $\mu$ M of the tested compounds and with vigorous shaking. Aliquot of 2.5 x 10<sup>8</sup> cells from these cultures were added to two volumes of RNAprotect Bacteria Reagent (Qiagen) and exactly the same protocol was used as previously described (Perraud *et al.*, 2020). Primers efficiency were determined using serially diluted genomic DNA and the double  $\Delta C_T$  method was used to analyze qPCR data. The primers used are summarized in Table S8.

## **Growth kinetic in function of time in the absence and presence of vectors and conjugates**

Bacteria were first grown overnight in LB, washed and then grown in CAA at 30 °C. This culture was washed and resuspended in CAA medium at an OD<sub>600 nm</sub> of 0.02 and 200  $\mu$ L was distributed in 96 well U-shaped plates (Greiner). Fresh, sterile-filtered aqueous solutions of the tested compounds were added to the different strains tested, at a final concentration of 10  $\mu$ M. OD<sub>600 nm</sub> was monitored in an Infinite M200 (TECAN, Austria) plate reader for 48 h, with regular agitation and incubation temperature set to 30 °C. More information on the bacterial strains, especially the knockouts, can be found in our previous, recent publication Fritsch *et al.*

**Table S8:** Primers used for the RT-qPCR assays.

| Primer ID | Target      | Sequence                 |
|-----------|-------------|--------------------------|
| uvrD F    | <i>uvrD</i> | CTACGGTAGCGAGACCTACAACAA |
| uvrD R    | <i>uvrD</i> | GCGGCTGACGGTATTGGA       |
| pfeA F    | <i>pfeA</i> | GCCGAGACCAGCGTGAAC       |
| pfeA R    | <i>pfeA</i> | GGCCGGATTTCGATCTTGTT     |
| pirA F    | <i>pirA</i> | GCCTGAACGCTTCCCAAA       |
| pirA R    | <i>pirA</i> | TGAAGGCCCGTGCGATA        |
| fpvA F    | <i>fpvA</i> | AGCCGCCTACCAGGATAAGC     |
| fpvA R    | <i>fpvA</i> | TGCCGTAATAGACGCTGGTTT    |
| fptA F    | <i>fptA</i> | GCGCCTGGGCTACAAGATC      |
| fptA R    | <i>fptA</i> | CCGTAGCGGTTGTTCCAGTT     |

**Table S9.** MIC values in *P. aeruginosa*  $\Delta$ pvdF $\Delta$ pchA strain for siderophores **2** and **4**, peptides **5-10** and peptide-siderophore conjugates **11-34**  $\mu$ M and  $\mu$ g/ml.

| Compound         | MIC 24 h<br>[ $\mu$ M] | MIC 24 h<br>[ $\mu$ g/ml] | MIC 48 h<br>[ $\mu$ M] | MIC 48 h<br>[ $\mu$ g/ml] |
|------------------|------------------------|---------------------------|------------------------|---------------------------|
| 1                | -                      | -                         | -                      | -                         |
| 2                | 64                     | 62.47                     | 64                     | 62.47                     |
| 3                | -                      | -                         | -                      | -                         |
| 4                | >64                    | >43.69                    | >64                    | >43.69                    |
| 5                | >64                    | >131.2                    | >64                    | >131,2                    |
| 6                | >64                    | >140.8                    | >64                    | >140.8                    |
| 7                | >64                    | >166.2                    | >64                    | >166.2                    |
| 8                | >64                    | >79,90                    | >64                    | >79.90                    |
| 9                | >64                    | >72.34                    | >64                    | >72.34                    |
| 10               | >64                    | >77.91                    | >64                    | >77.91                    |
| 11               | 0.5                    | 1.814                     | 1                      | 3.628                     |
| 12               | 0.5                    | 1.889                     | 1                      | 3.778                     |
| 13               | 4                      | 16.70                     | 32                     | 133.6                     |
| 14               | 32                     | 90.45                     | >64                    | >180.9                    |
| 15               | 32                     | 86.67                     | 32                     | 86.67                     |
| 16               | >64                    | >178.9                    | >64                    | >178.9                    |
| 17               | 0.1                    | 0.363                     | >64                    | >232.2                    |
| 18               | >64                    | >241.8                    | >64                    | >241.8                    |
| 19               | >64                    | >267.2                    | >64                    | >267.2                    |
| 20               | >64                    | >258.0                    | >64                    | >258.0                    |
| 21               | 8                      | 29.78                     | >64                    | >238.2                    |
| 22               | >64                    | >209.3                    | >64                    | >209.3                    |
| 23               | >64                    | >218.9                    | >64                    | >218.9                    |
| 24               | >64                    | >244.2                    | >64                    | >244.2                    |
| 25               | >64                    | >157.9                    | >64                    | >157.9                    |
| 26               | >64                    | >150.4                    | >64                    | >150.4                    |
| 27               | >64                    | >156.0                    | >64                    | >156.0                    |
| 28               | >64                    | >209.3                    | >64                    | >209.3                    |
| 29               | >64                    | >218.9                    | >64                    | >218.9                    |
| 30               | >64                    | >244.2                    | >64                    | >244.2                    |
| 31               | >64                    | >235.0                    | >64                    | >235.0                    |
| 32               | >64                    | >215.3                    | >64                    | >215.3                    |
| C33              | >64                    | >139.9                    | >64                    | >139.9                    |
| C34              | >64                    | >149.5                    | >64                    | >149.5                    |
| N33 <sub>L</sub> | >64                    | >139.9                    | >64                    | >139.9                    |
| N34 <sub>L</sub> | >64                    | >149.5                    | >64                    | >149.5                    |
| N33 <sub>D</sub> | >64                    | >139.9                    | >64                    | >139.9                    |
| N34 <sub>D</sub> | >64                    | >149.5                    | >64                    | >149.5                    |
| Gentamicin       | 1                      | 0.478                     | 4                      | 1.91                      |

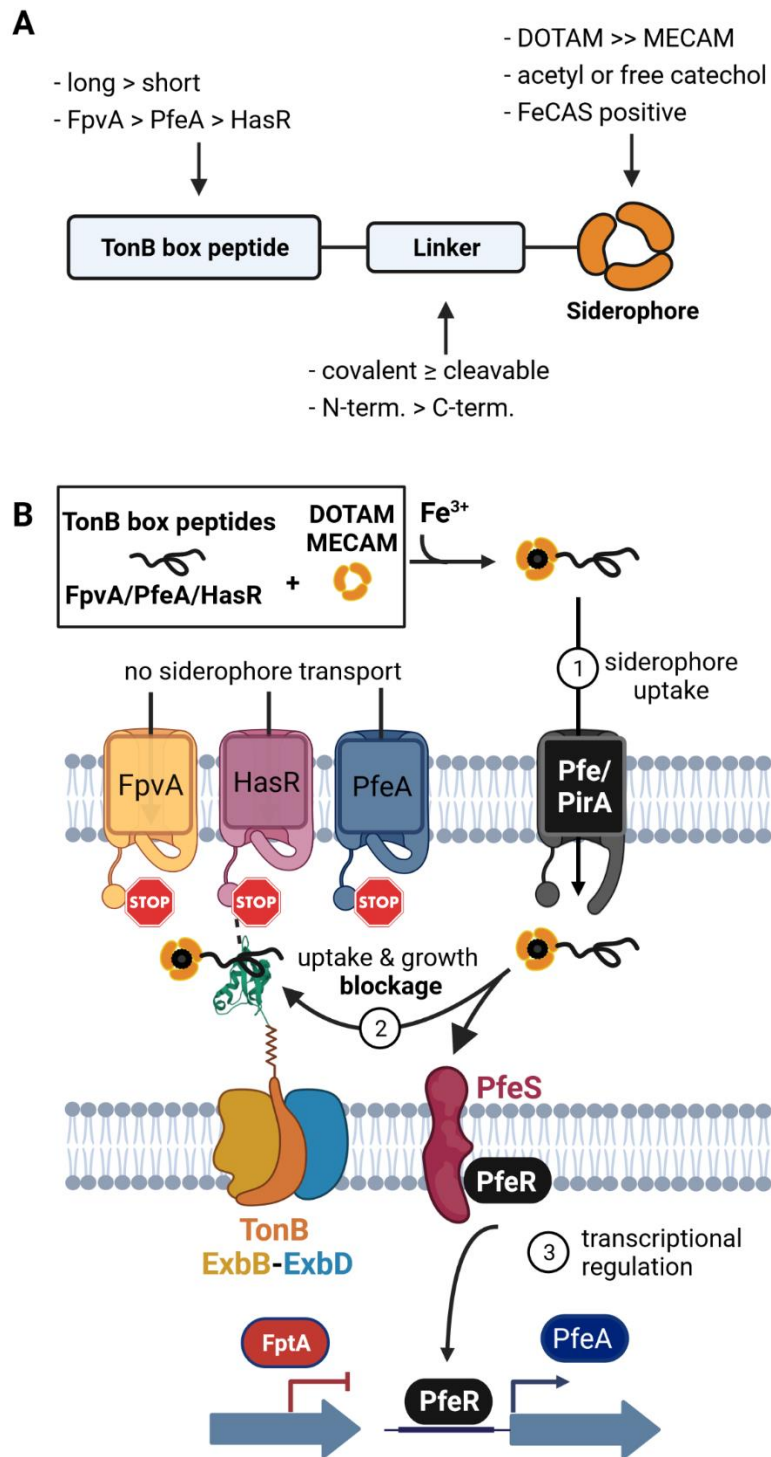

**Figure S4:** Rough structure-activity-relationships (A) and mechanistic summary (B) on TonB box peptide-siderophore conjugates.

# Appendix

## NMR and MS spectra

### Compound 1

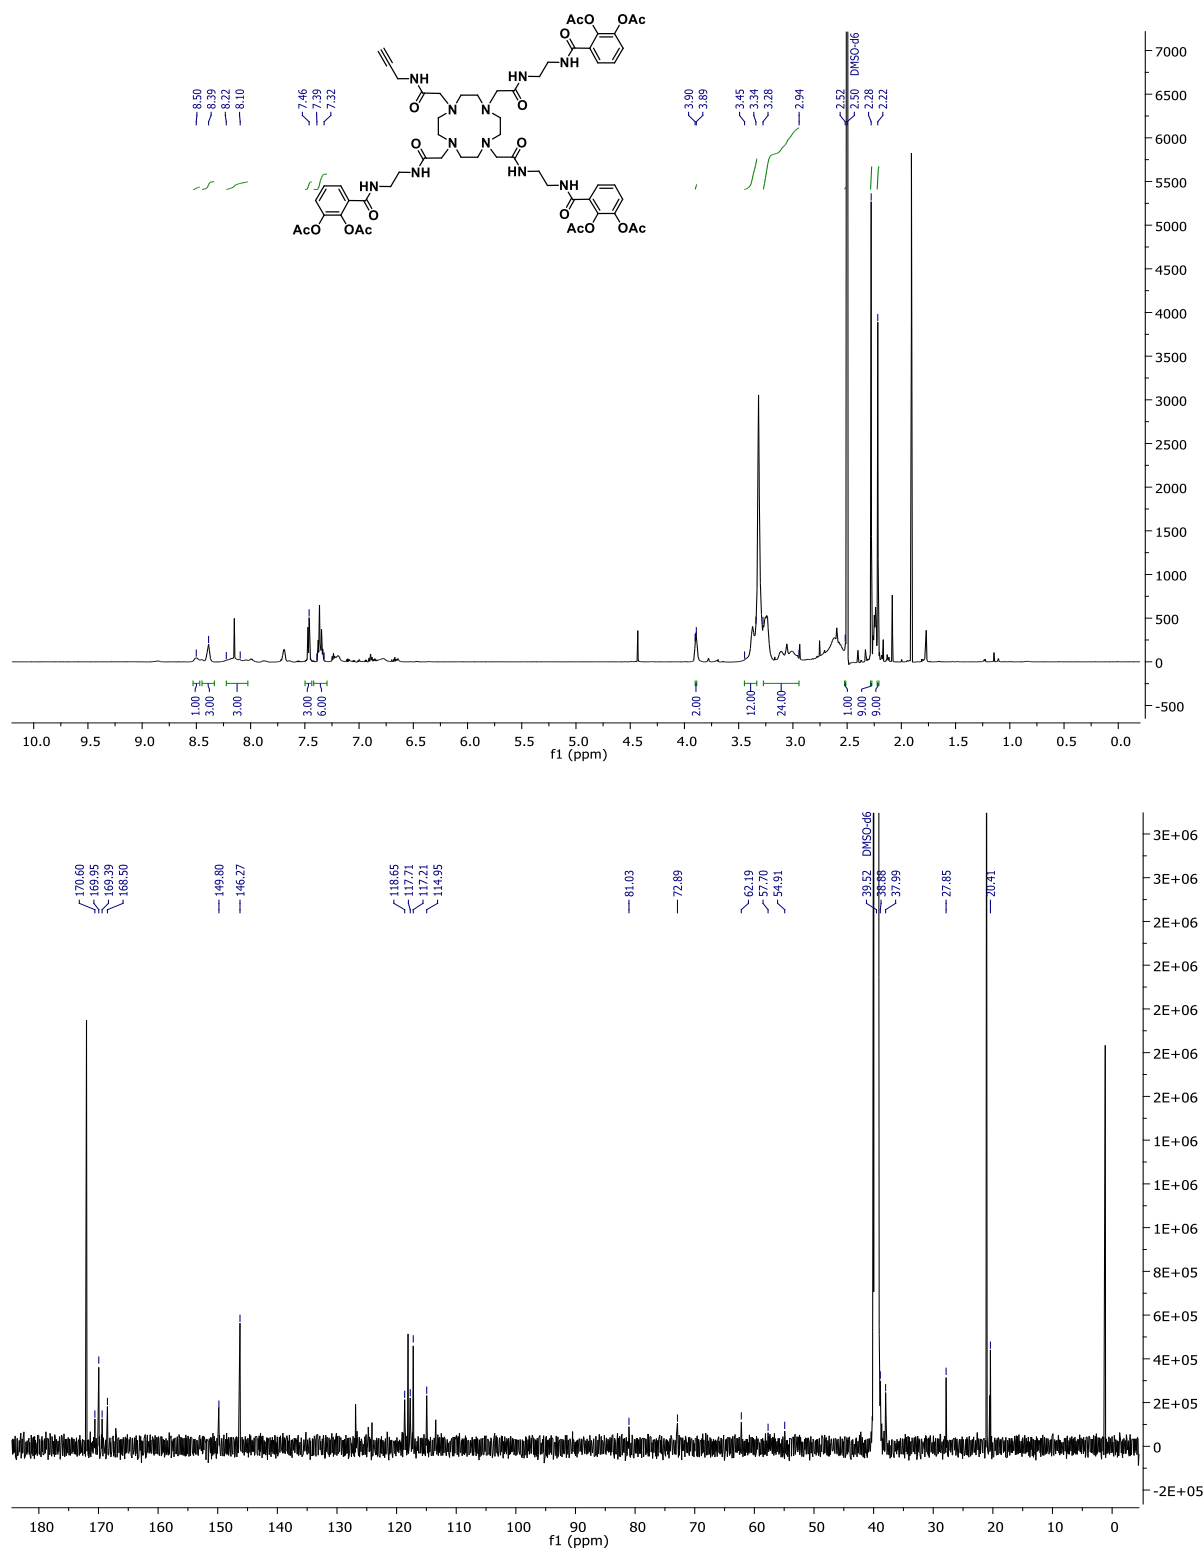

# Compound 2

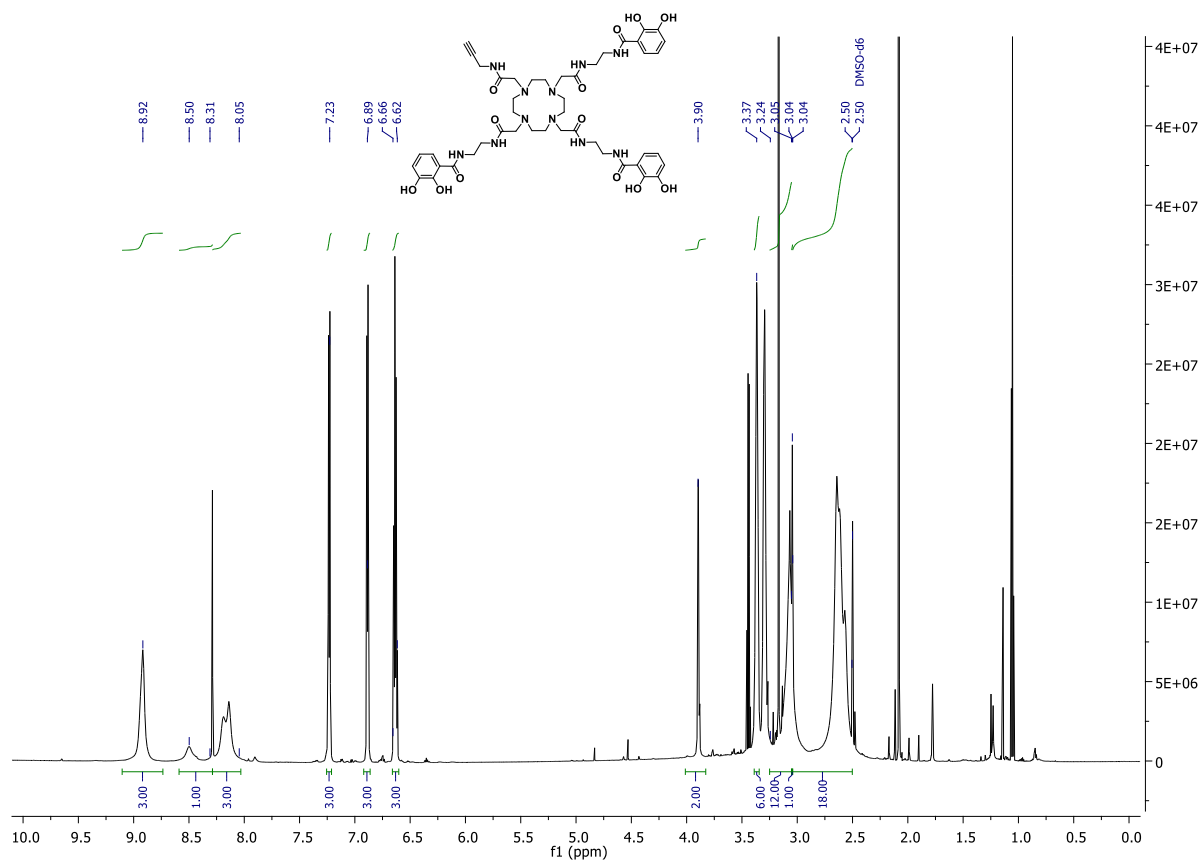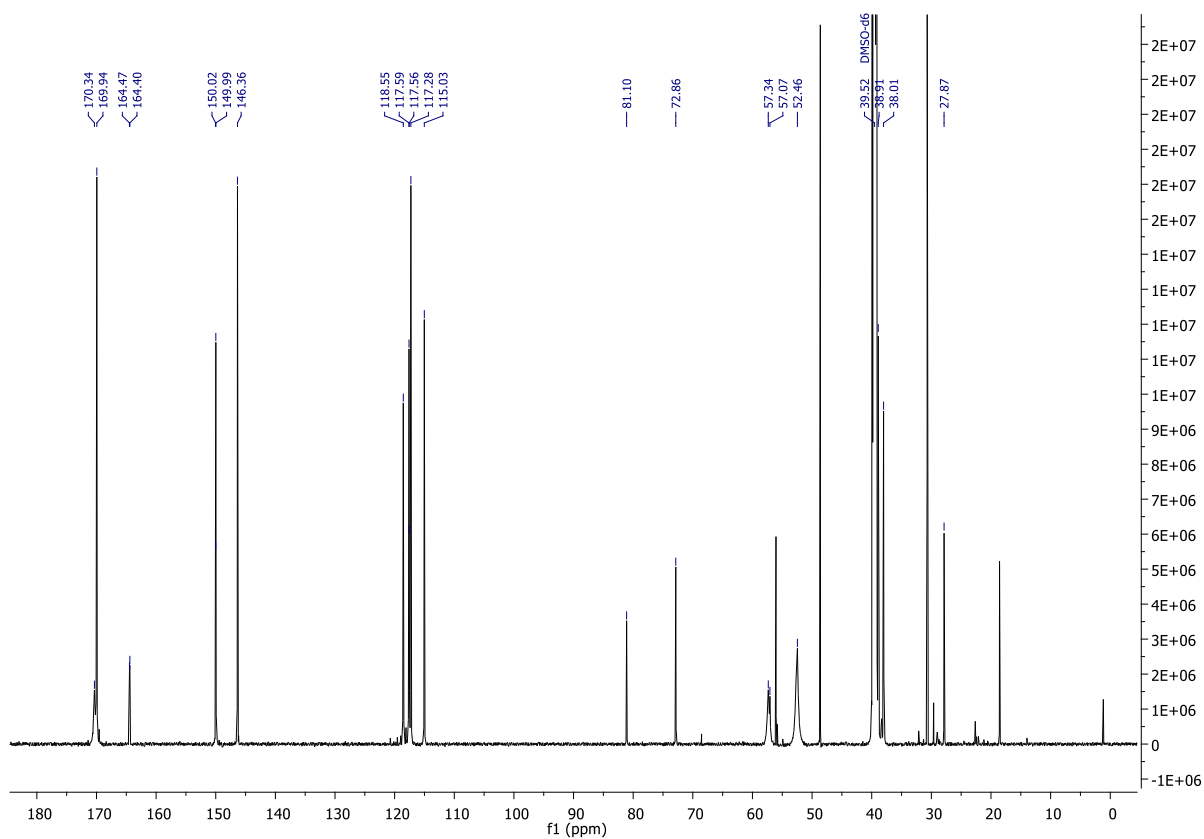



# Compound 3

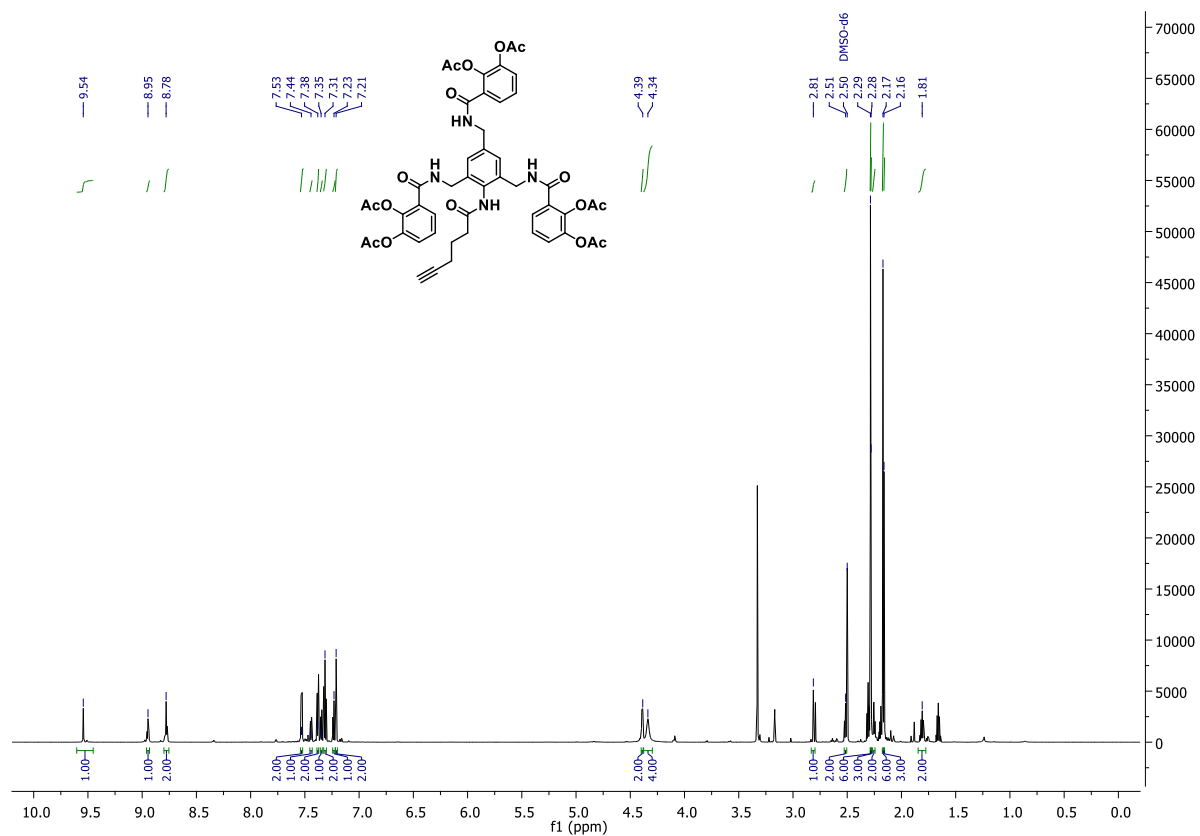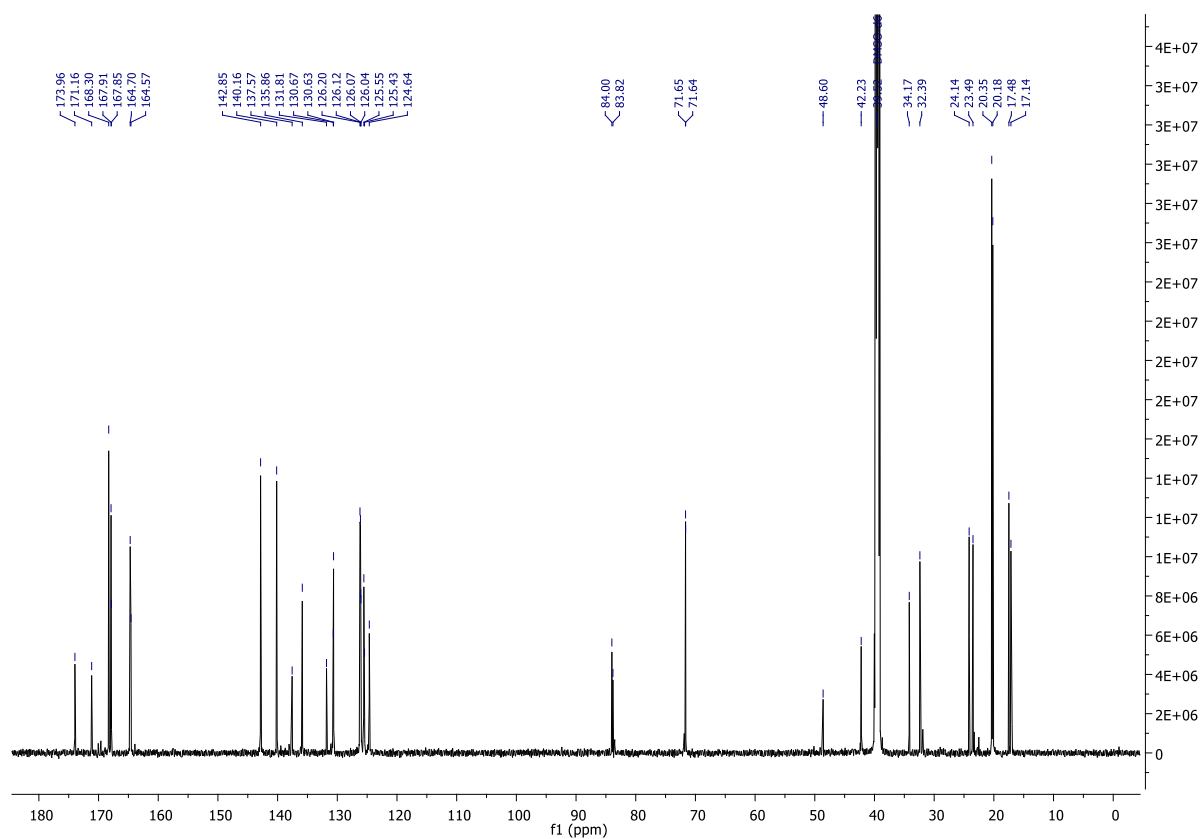

# Compound 4

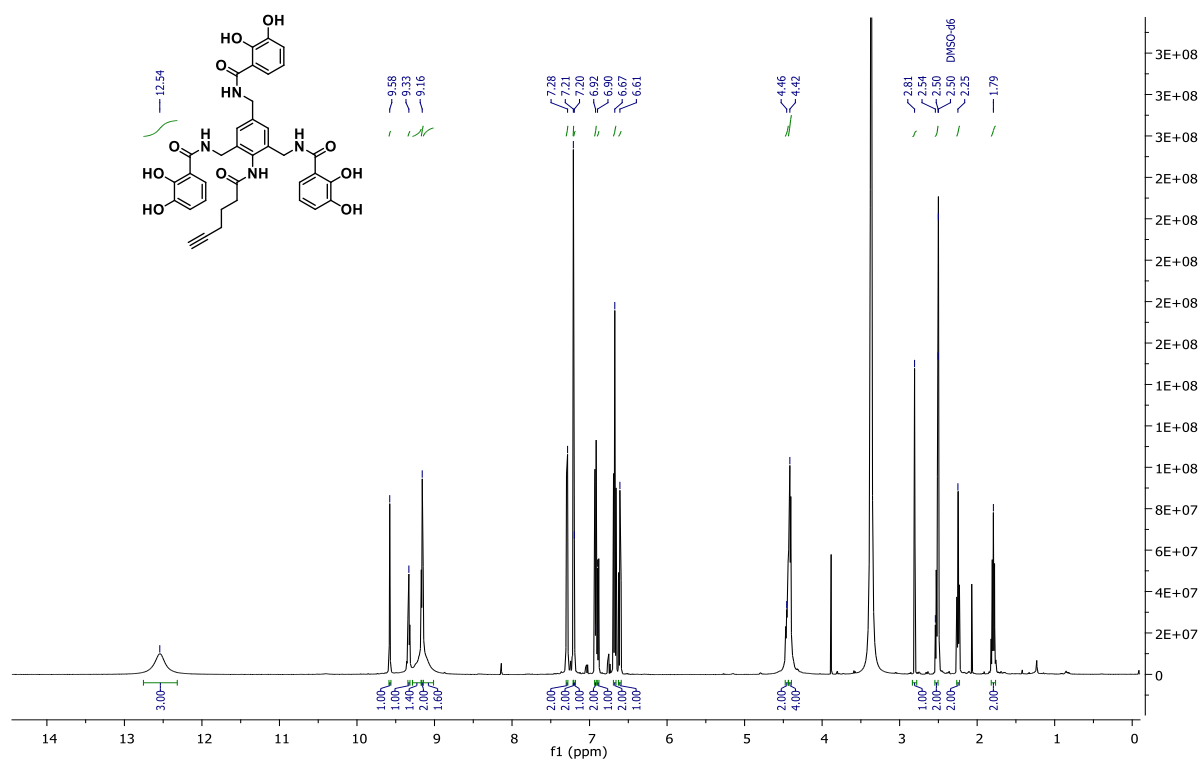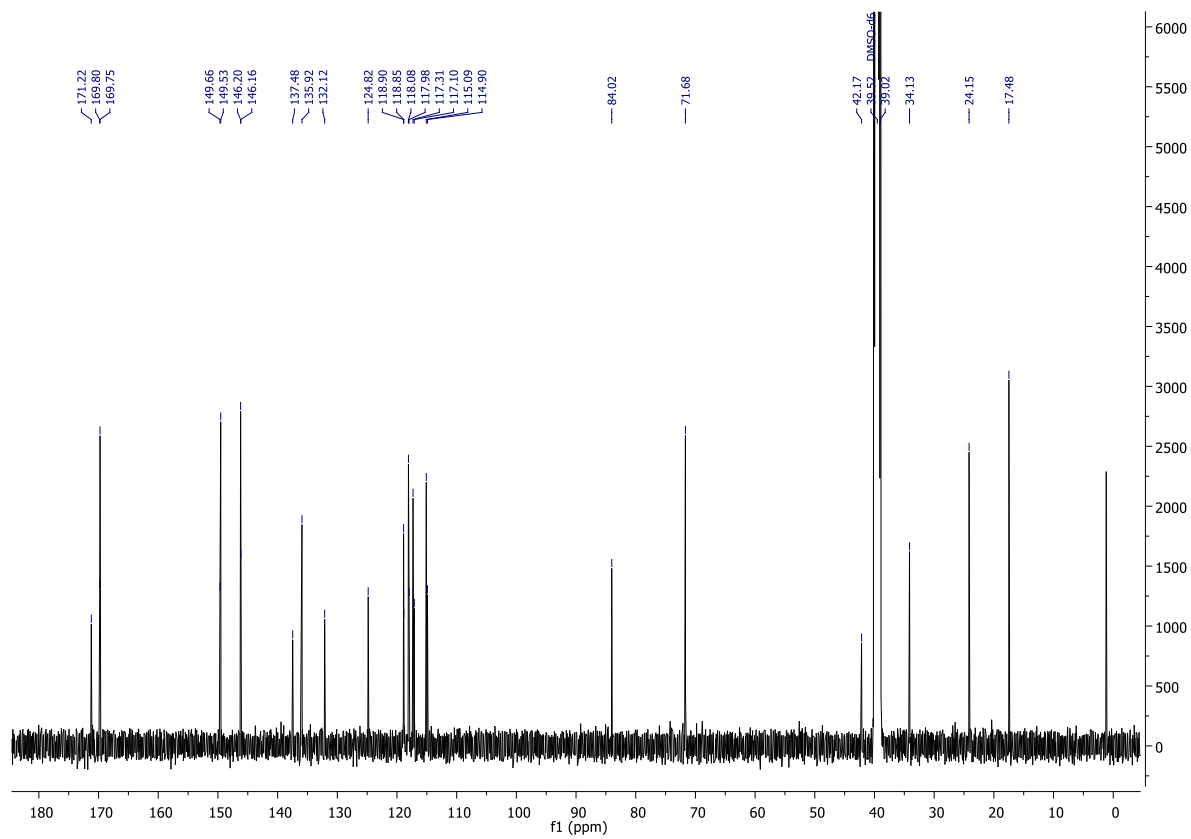

# Compound 5 (*FpvA* 121-139 peptide)

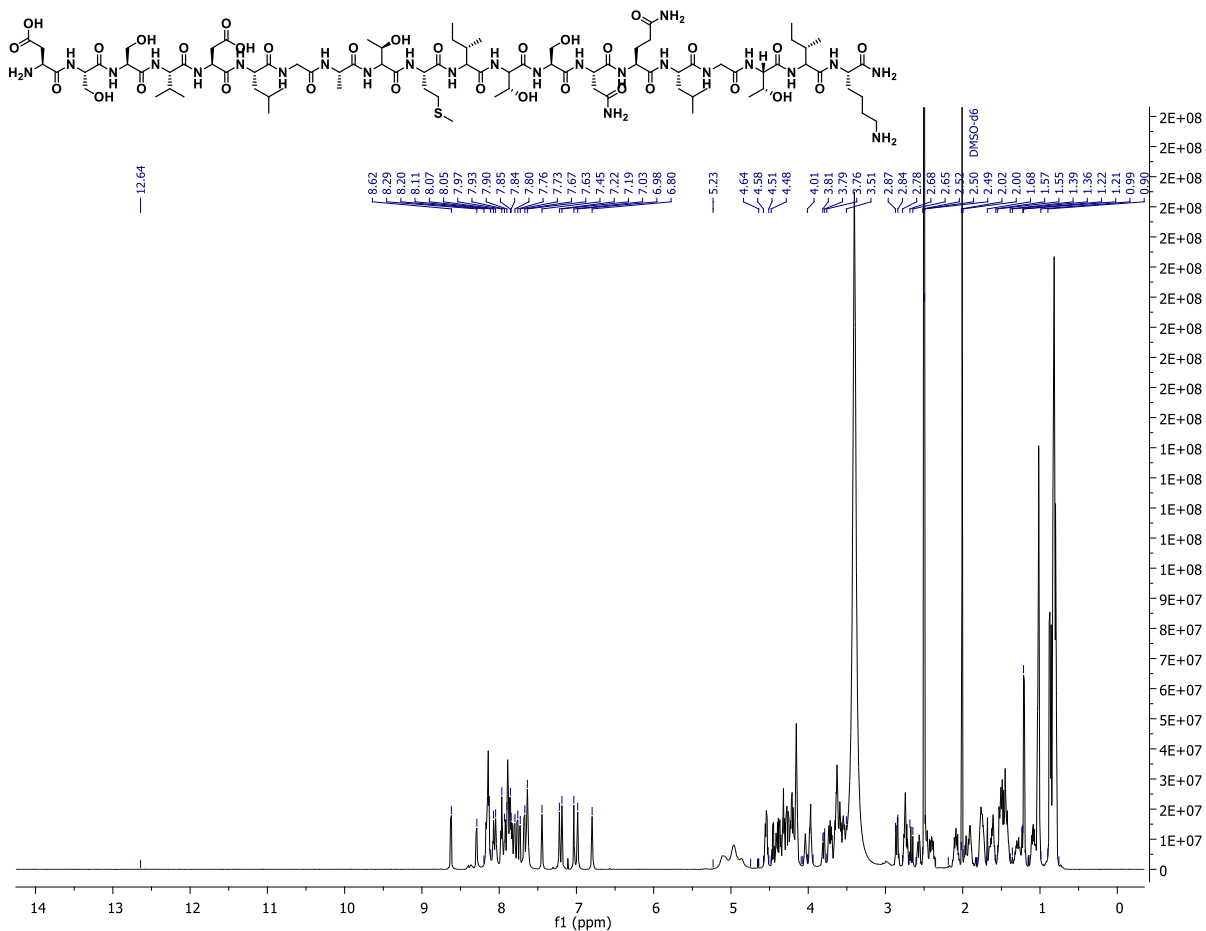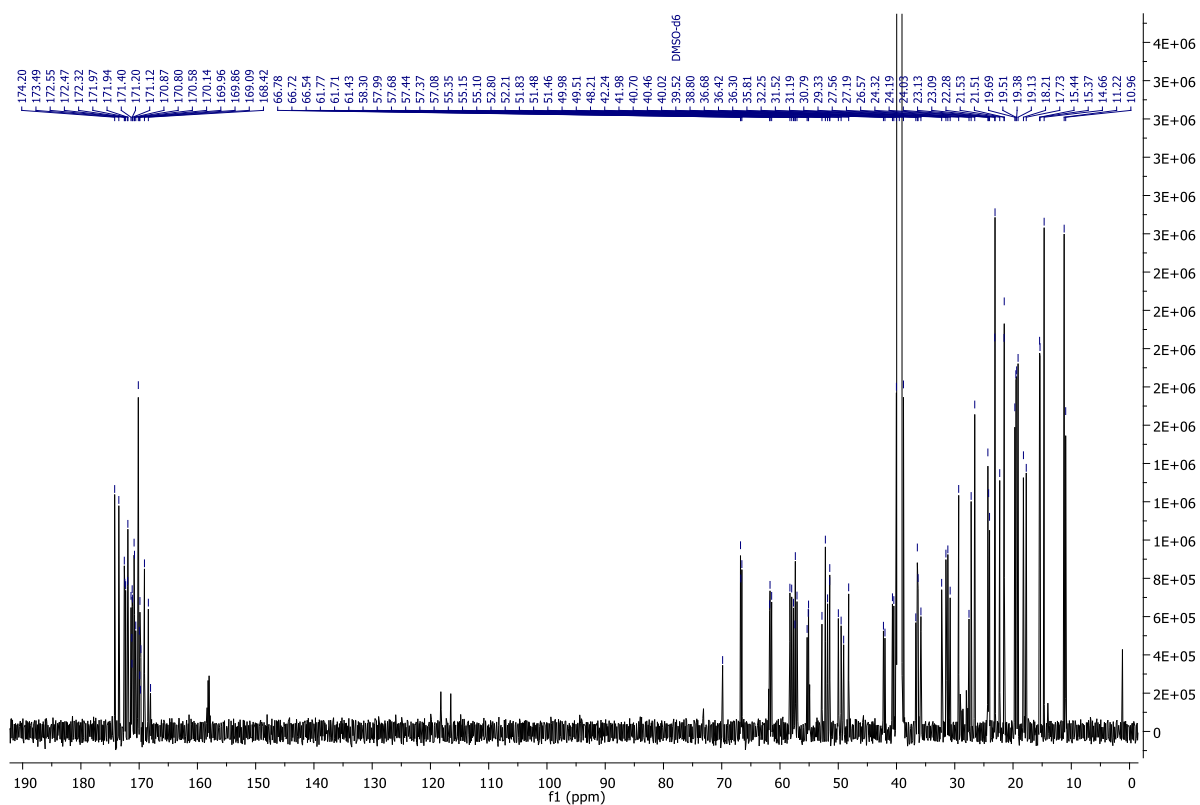

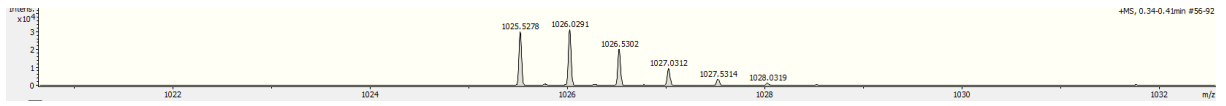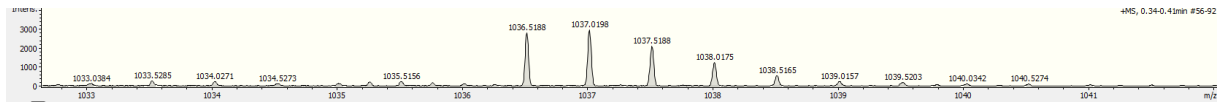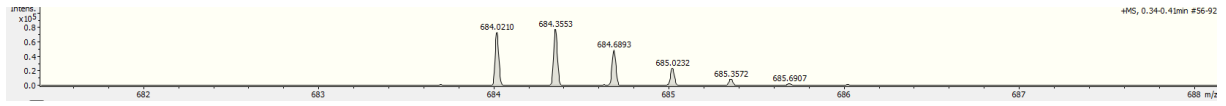

# Compound 6 (*PfeA* 33-51 peptide)

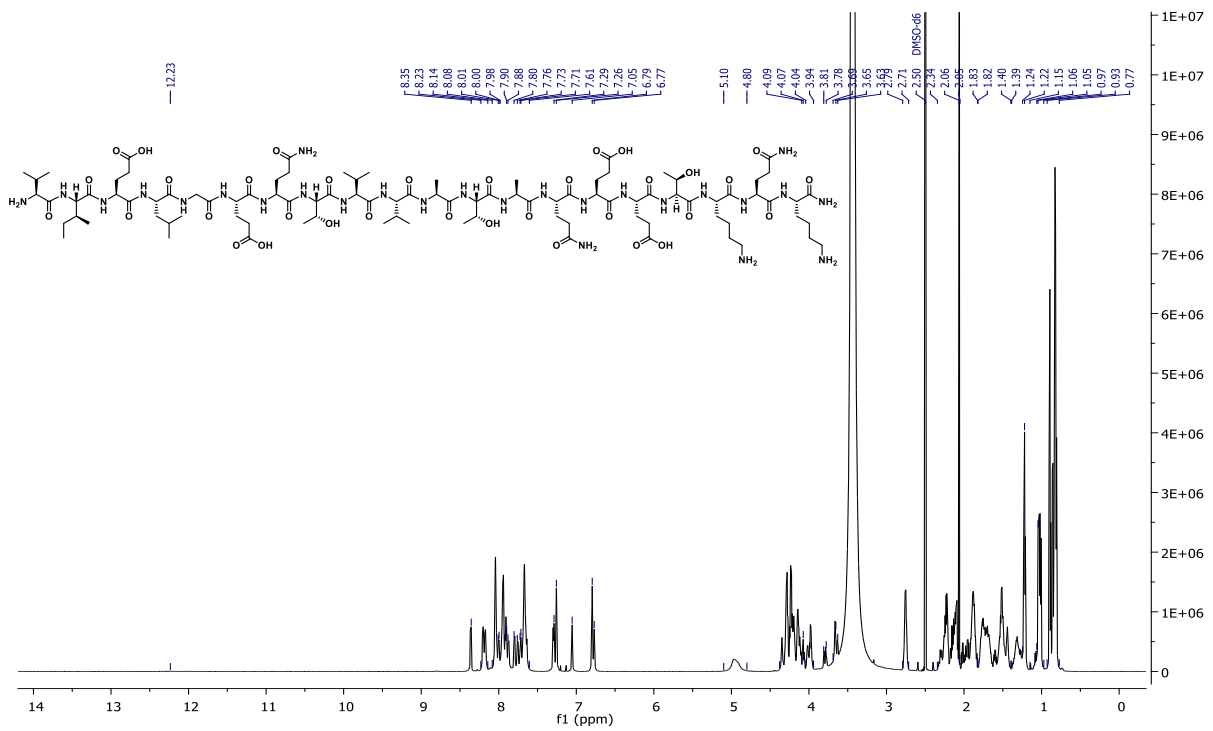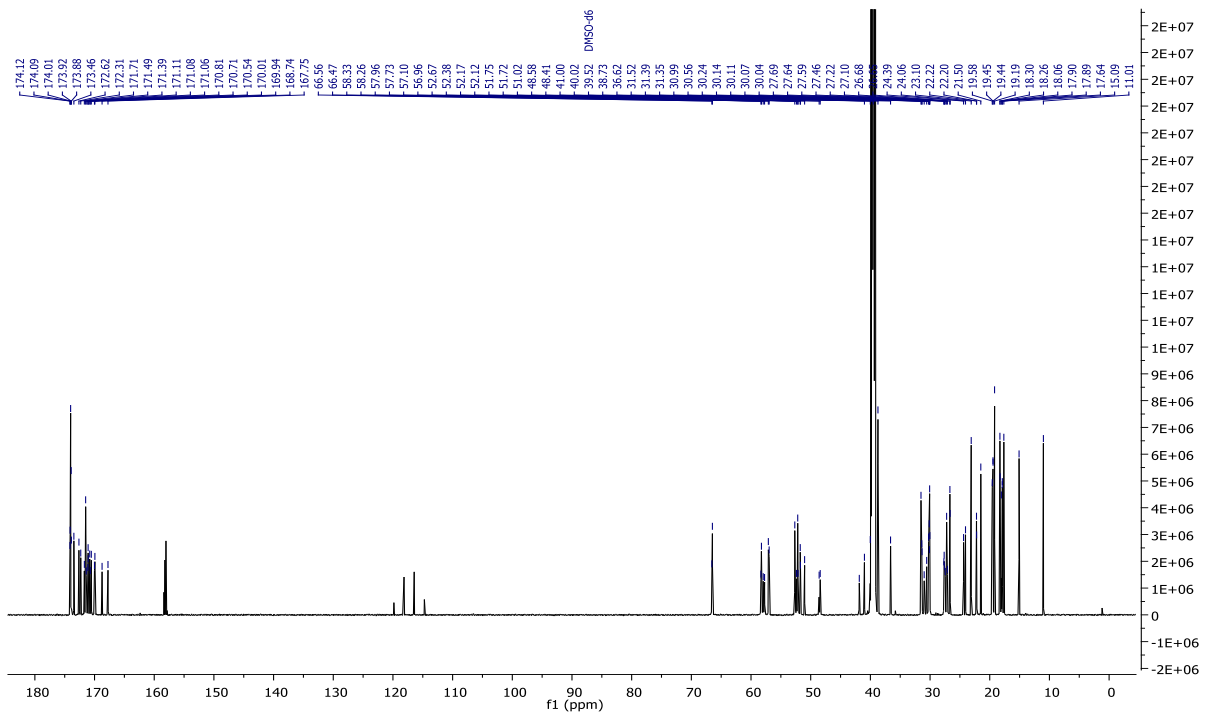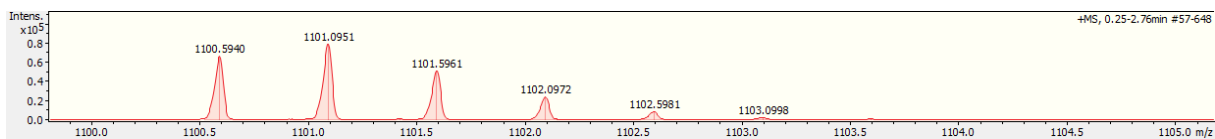

# Compound 7 (*HasR* 122-144 peptide)

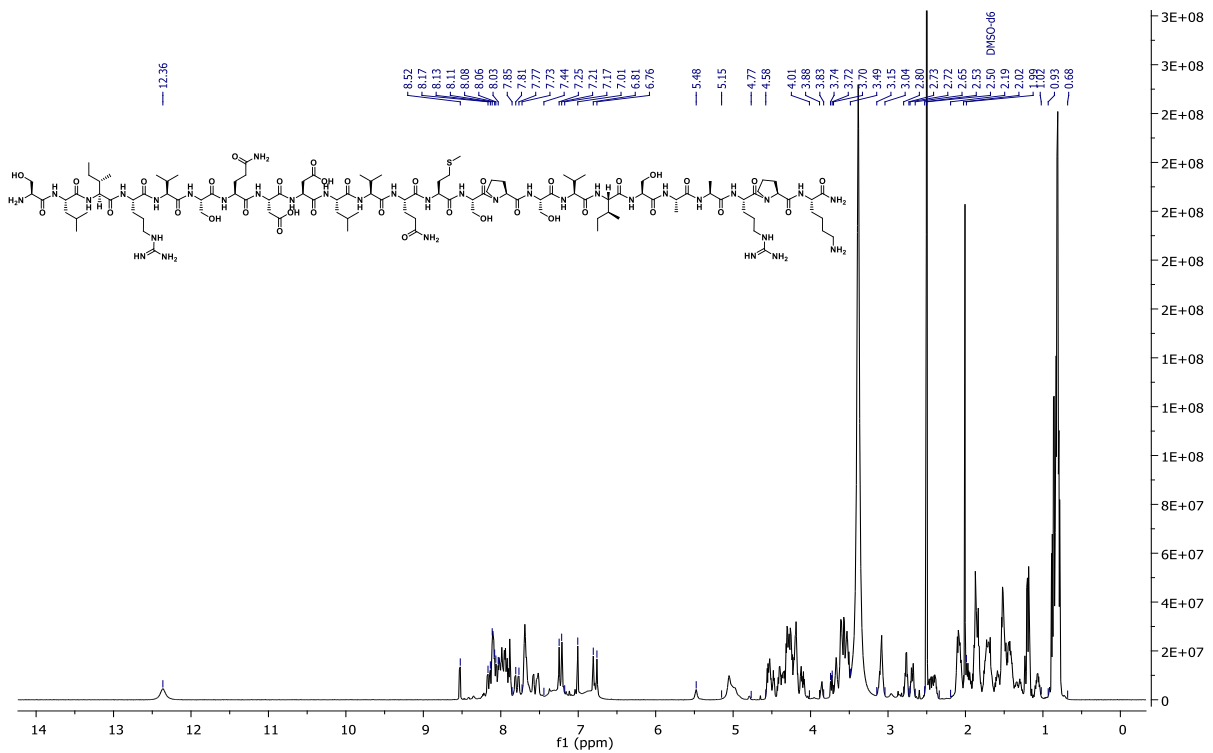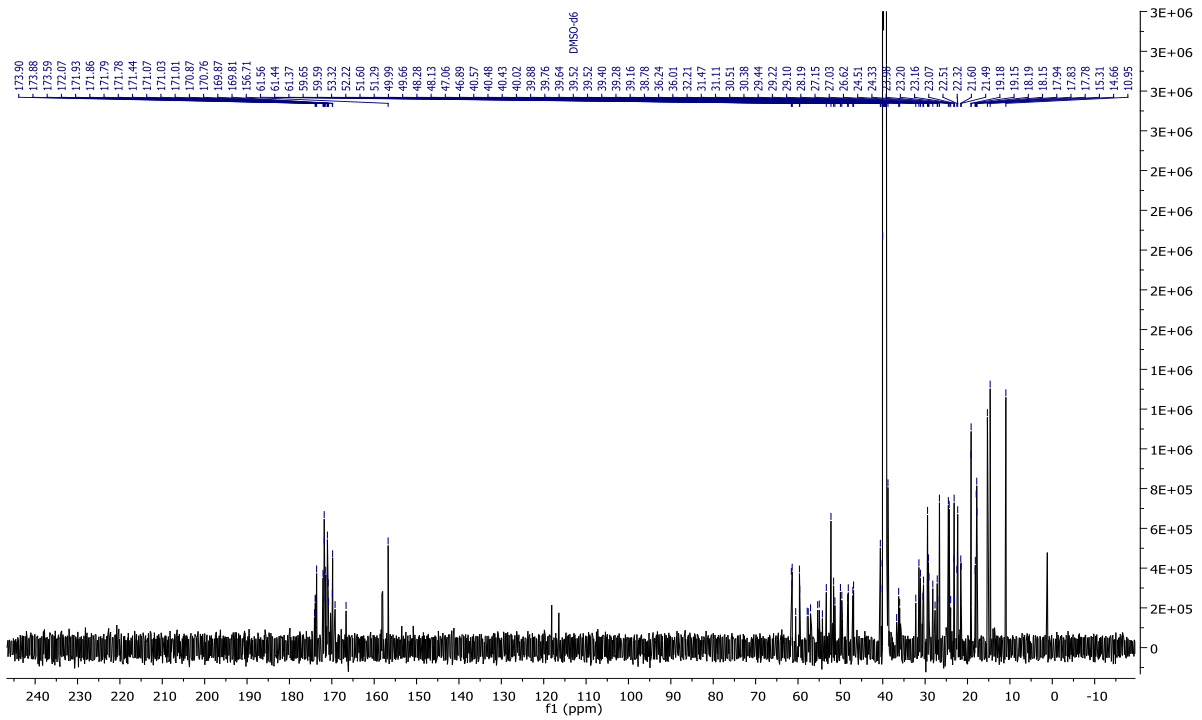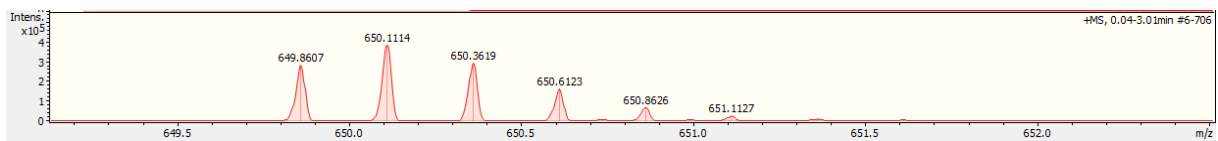







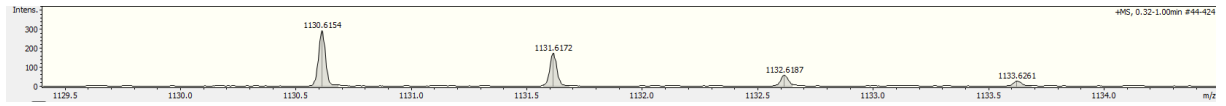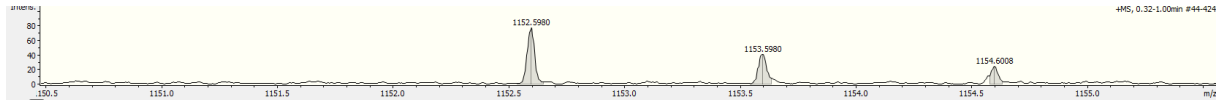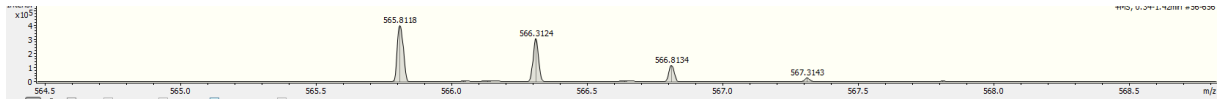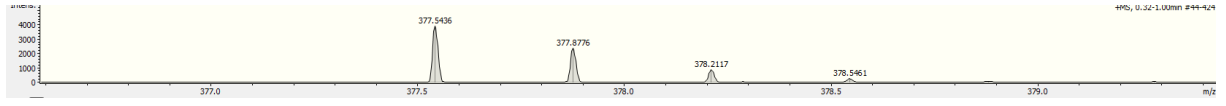



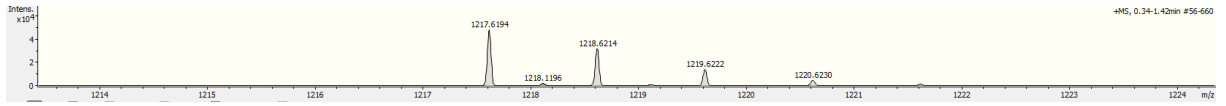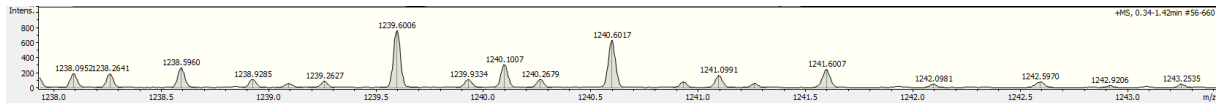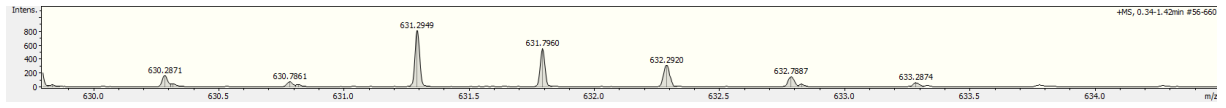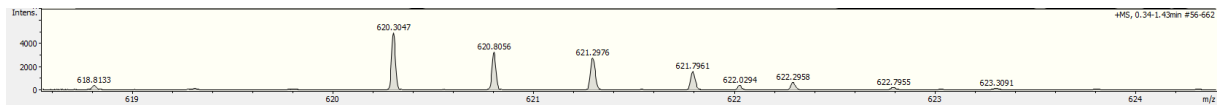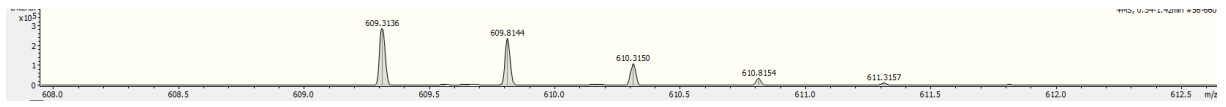

# Compound 11 (*FpvA* 121-139 N-term (PEG)<sub>7</sub>-Zn<sup>2+</sup>-DOTAM)

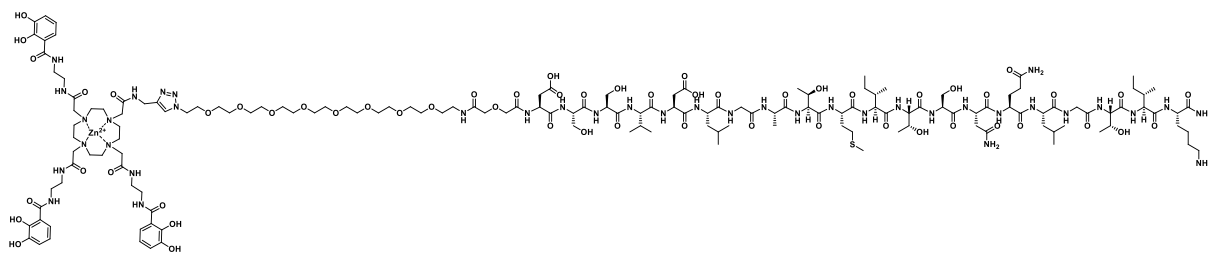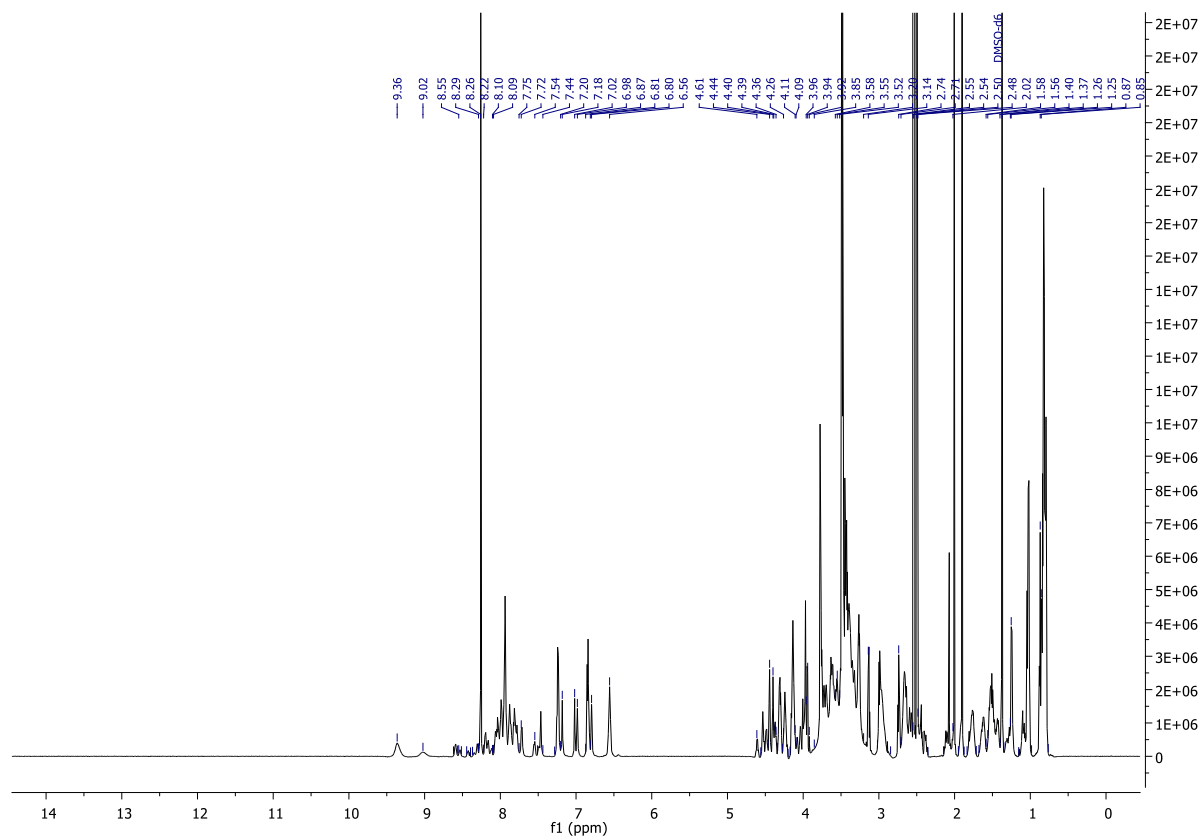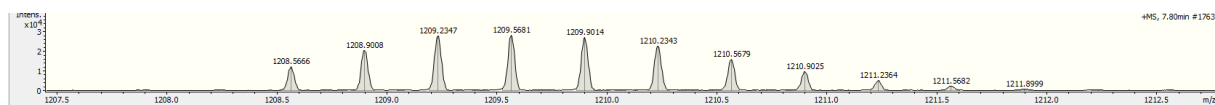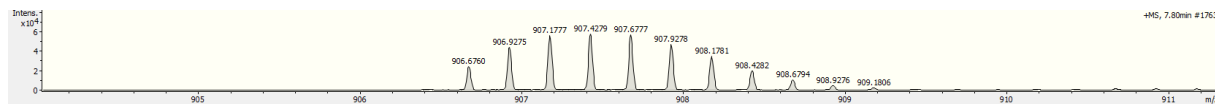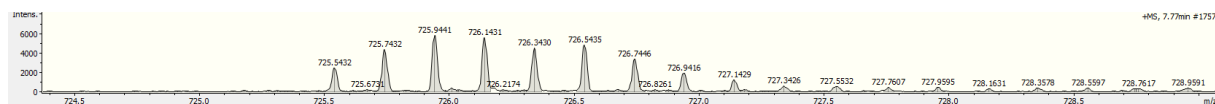

# Compound 12 (*PfeA* 33-51 *N*-term (PEG)<sub>7</sub>-Zn<sup>2+</sup>-DOTAM)

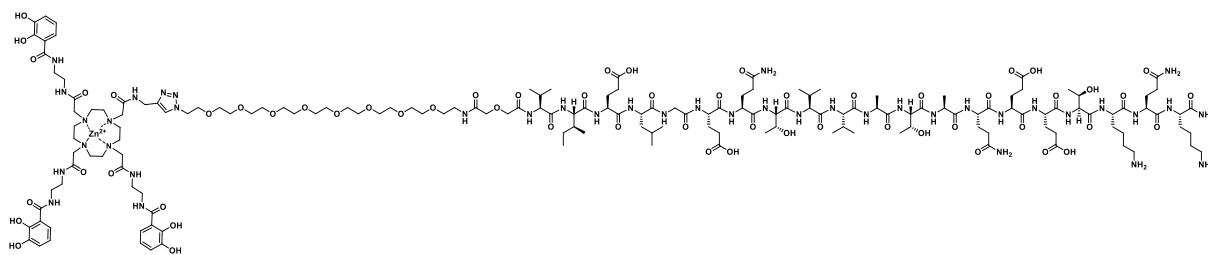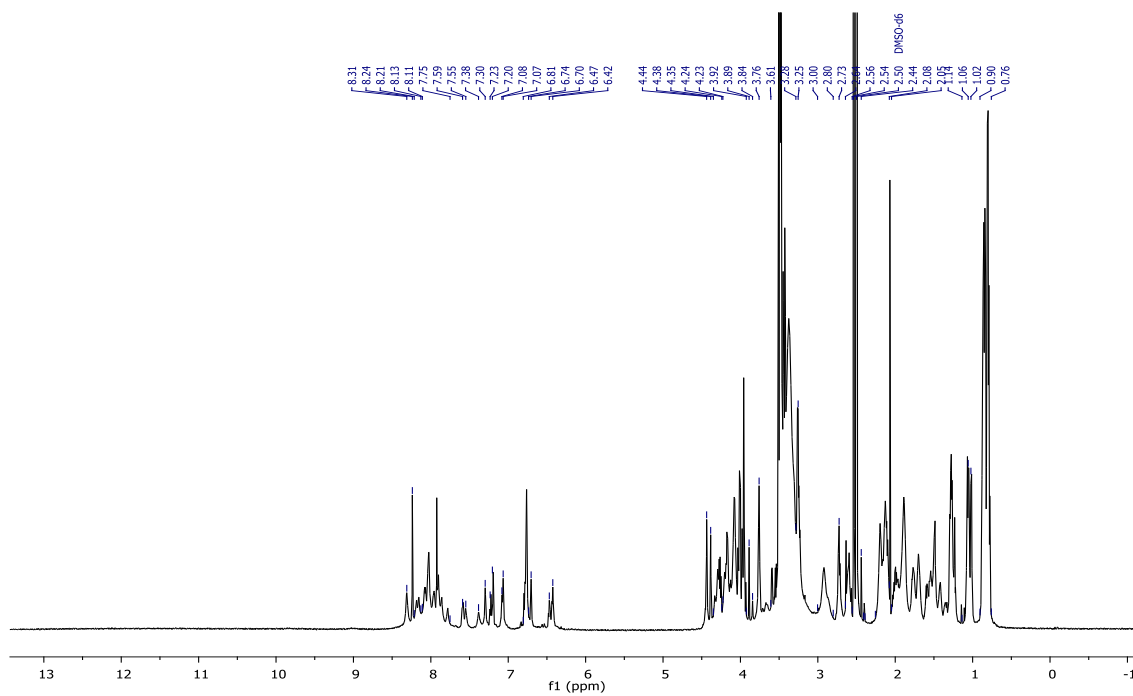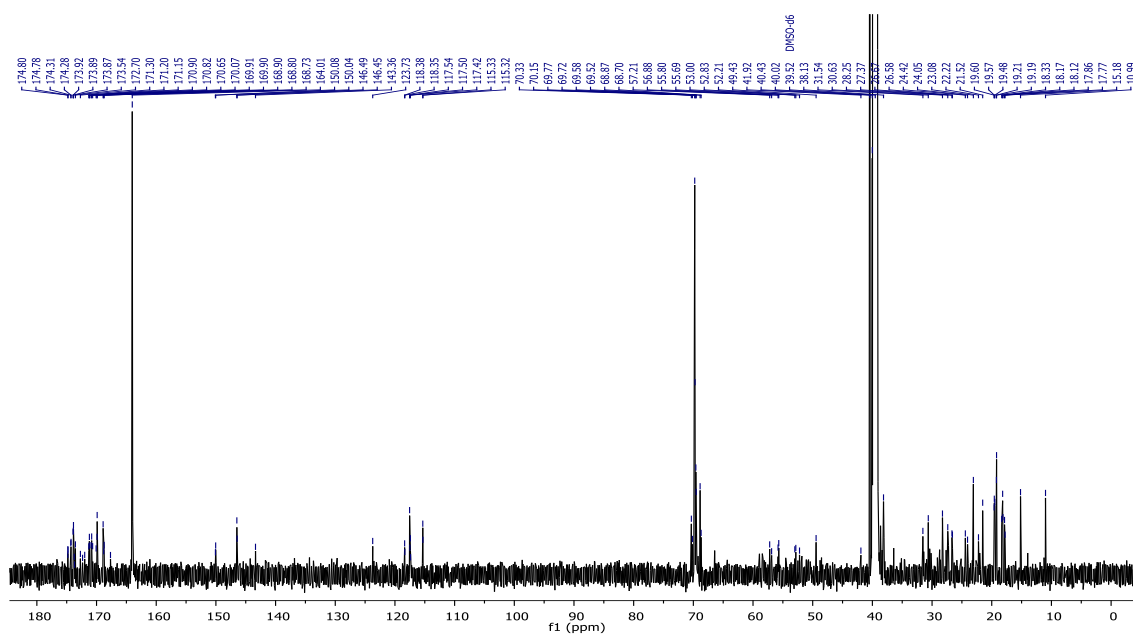

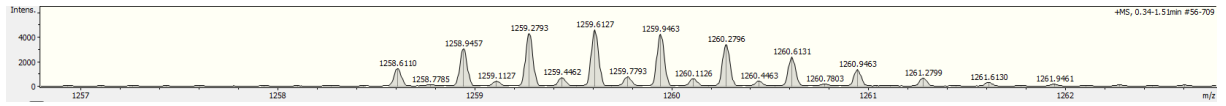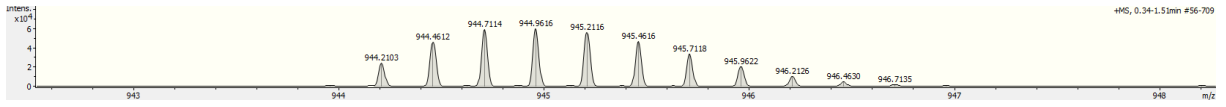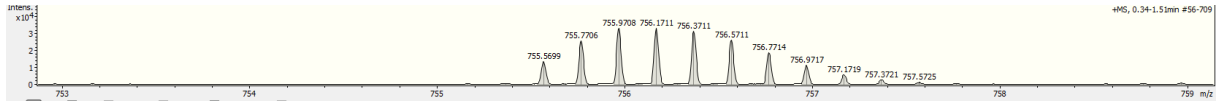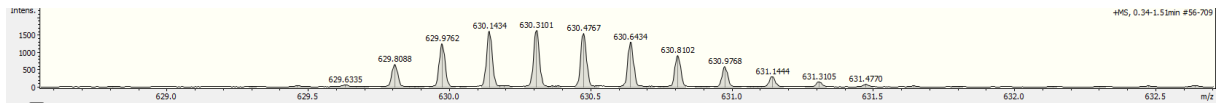

# Compound 13 (*HasR* 122-144 N-term (PEG)<sub>7</sub>-Zn<sup>2+</sup>-DOTAM)

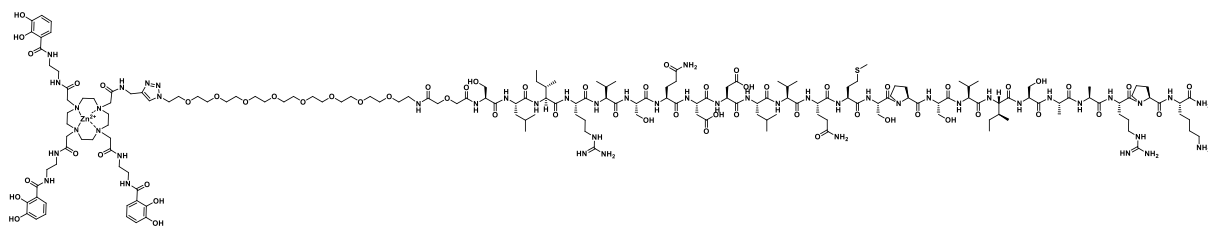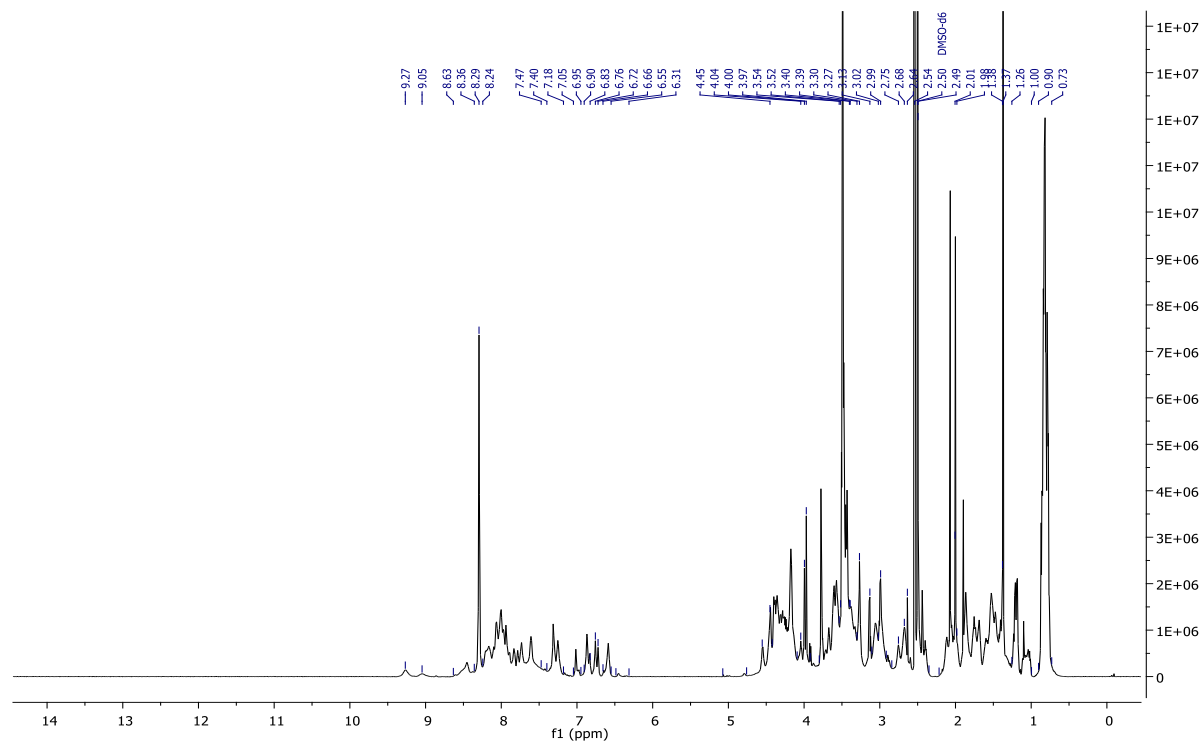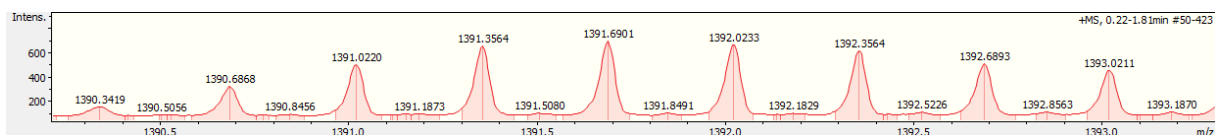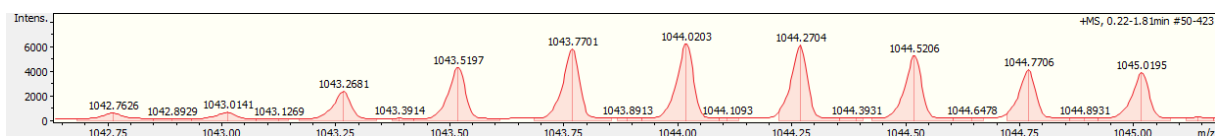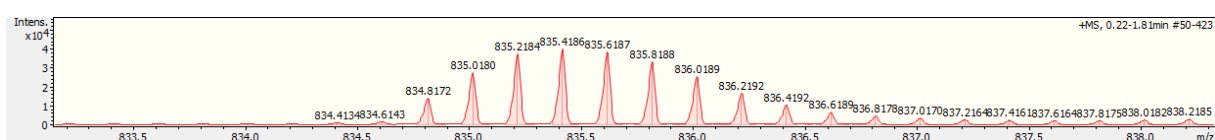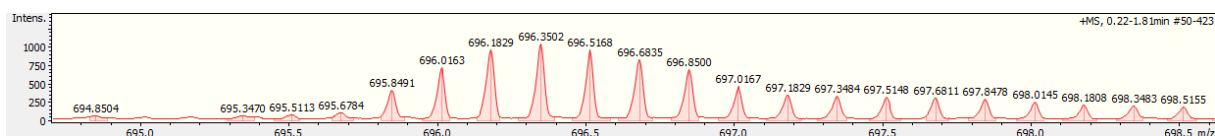





# Compound 18 (PfeA 37-46 N-term (PEG)<sub>7</sub>-Zn<sup>2+</sup>-DOTAM)

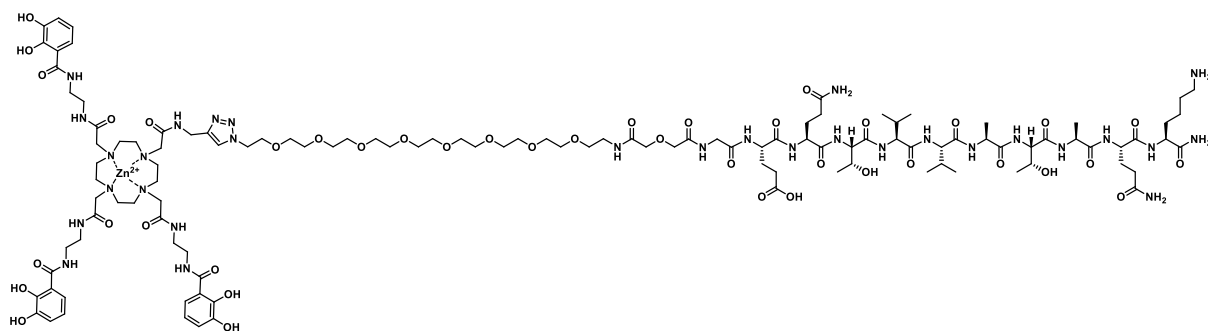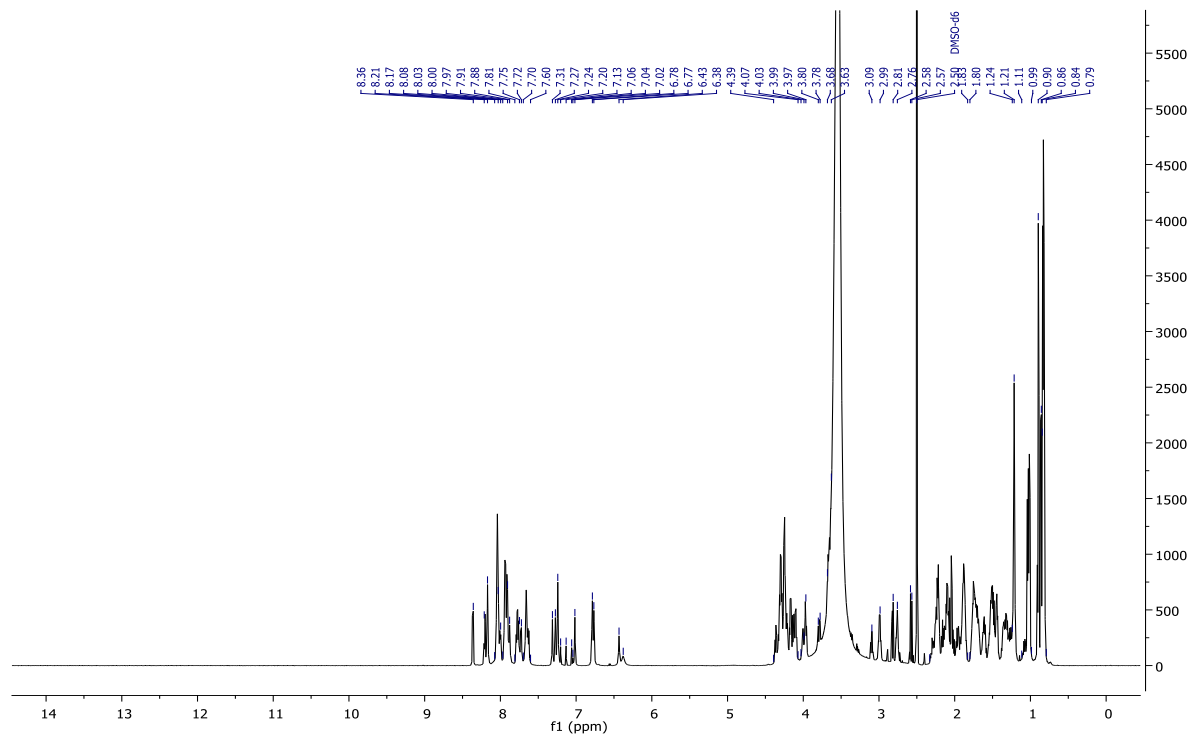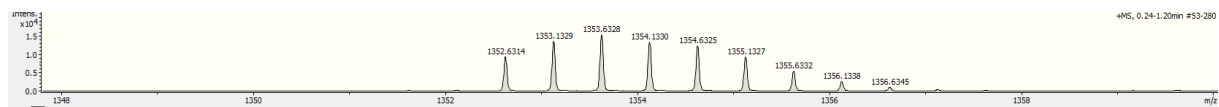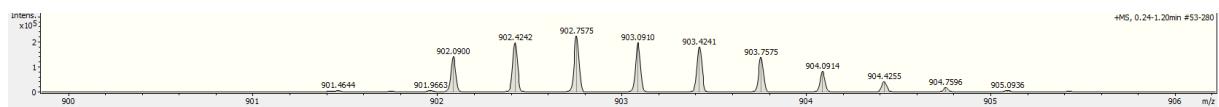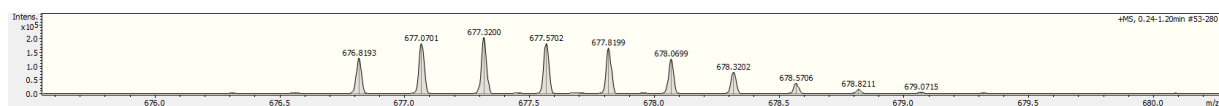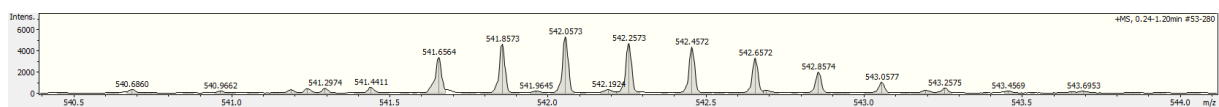

# Compound 19 (*HasR* 129-138 N-term (PEG)<sub>7</sub>-Zn<sup>2+</sup>-DOTAM)

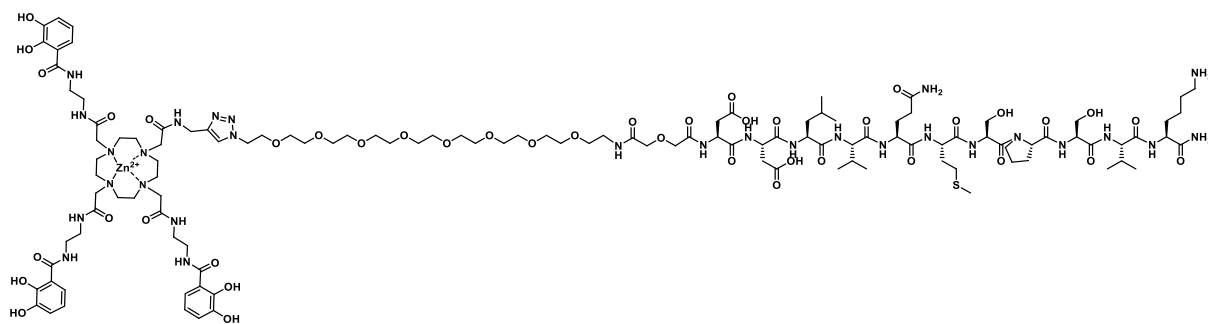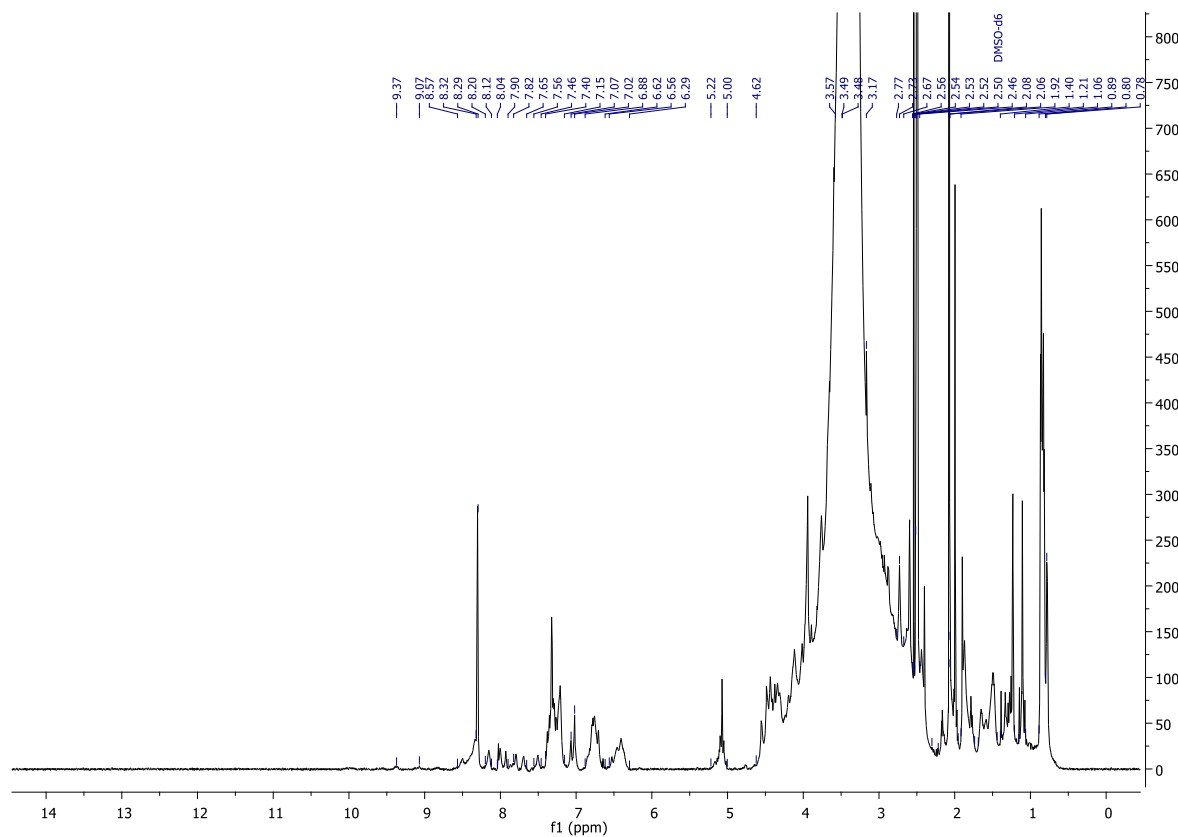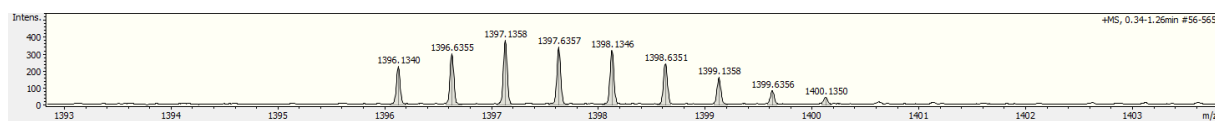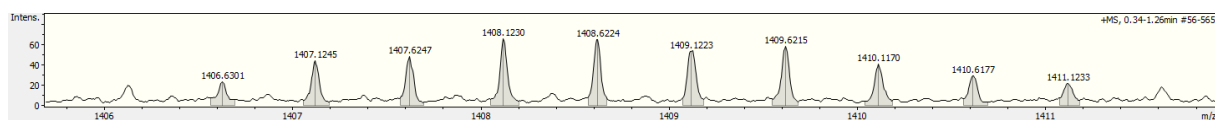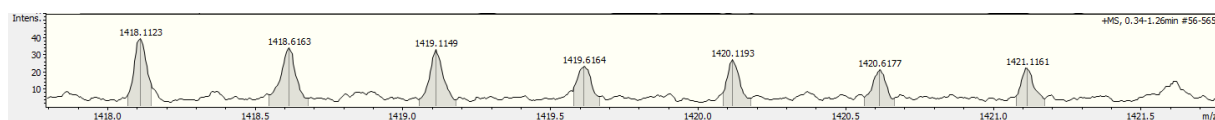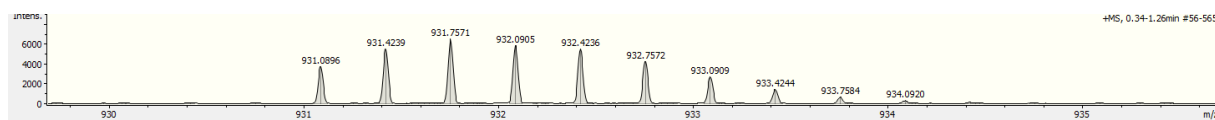

# Compound 14 (*FpvA* 121-139 C-term (PEG)<sub>7</sub>-Zn<sup>2+</sup>-DOTAM)

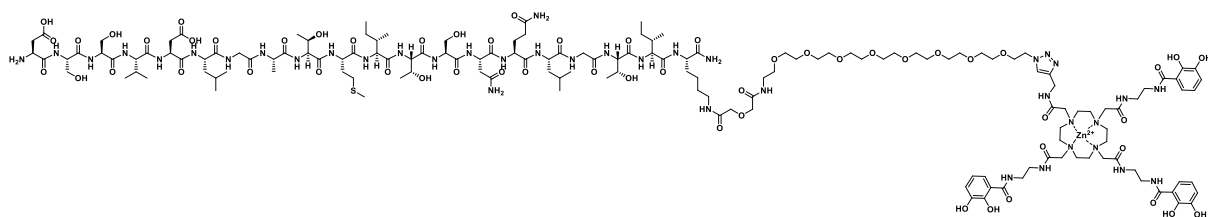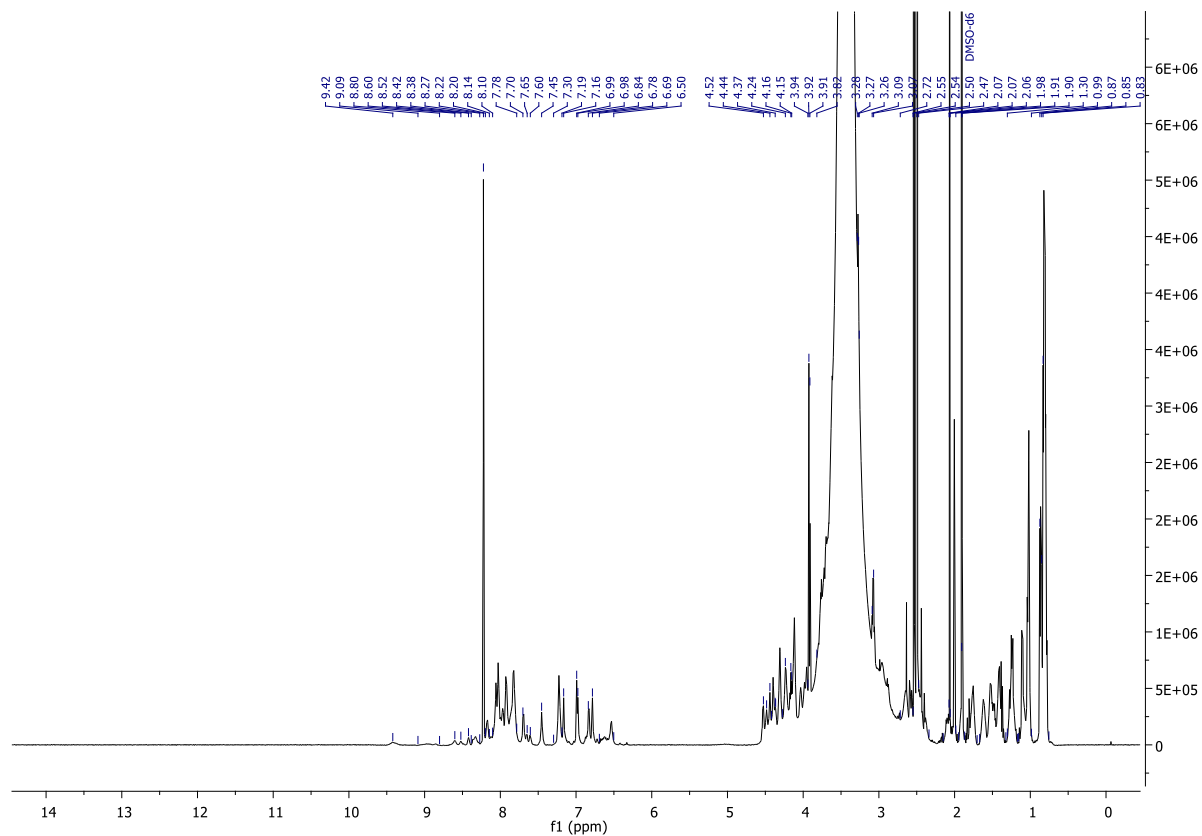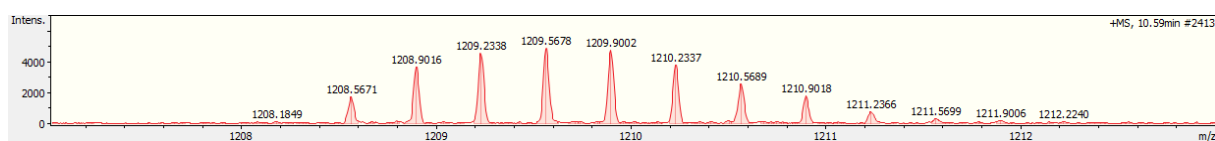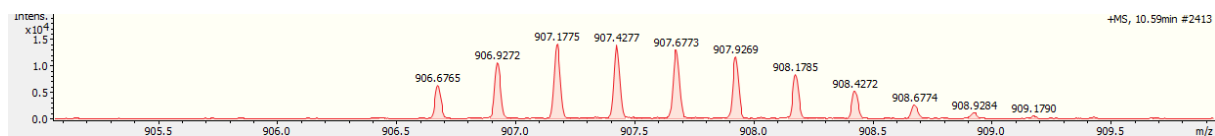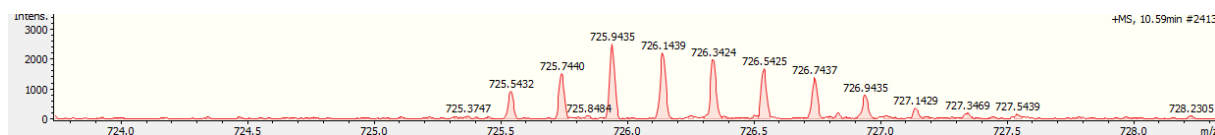

# Compound 15 (PfeA 33-51 C-term (PEG)<sub>7</sub>-Zn<sup>2+</sup>-DOTAM)

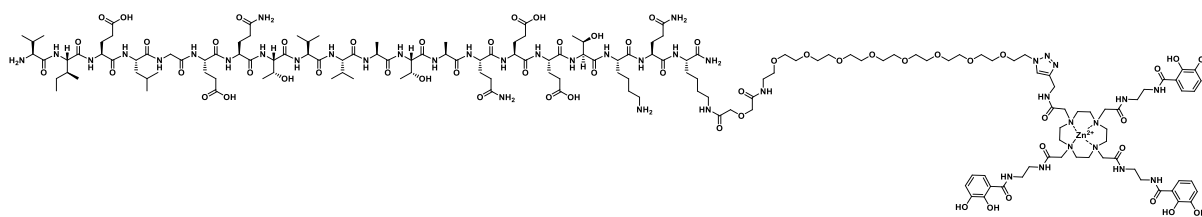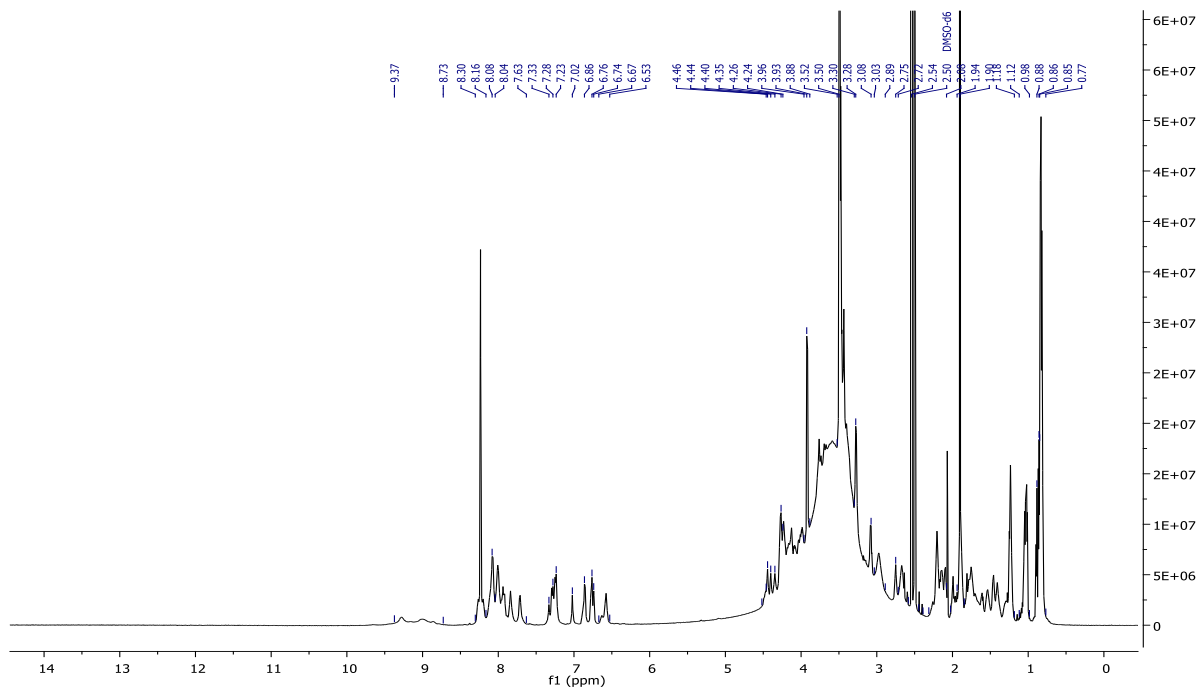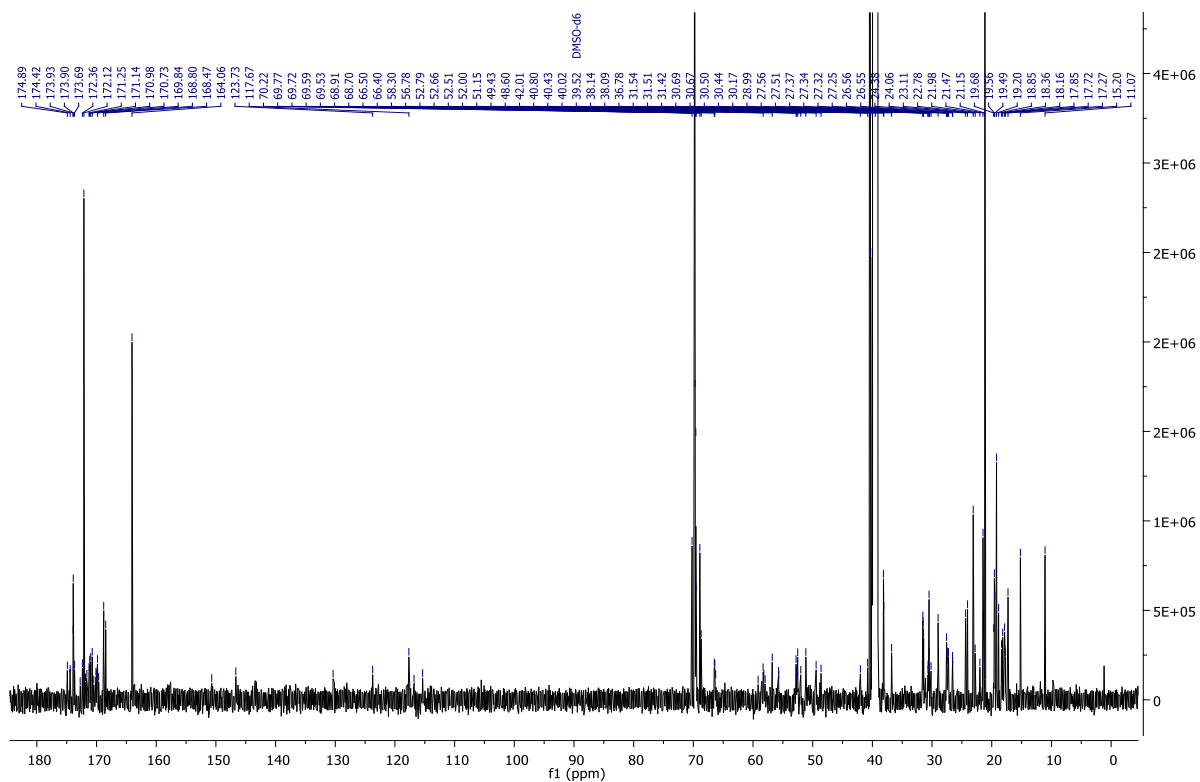

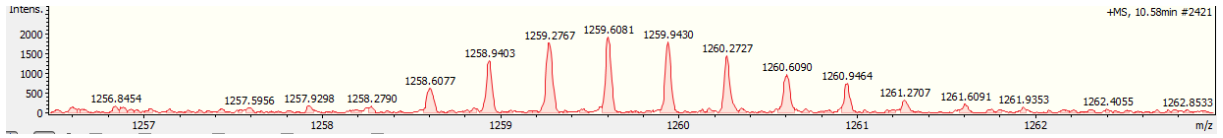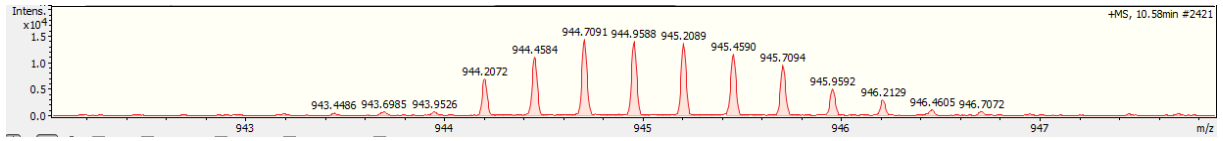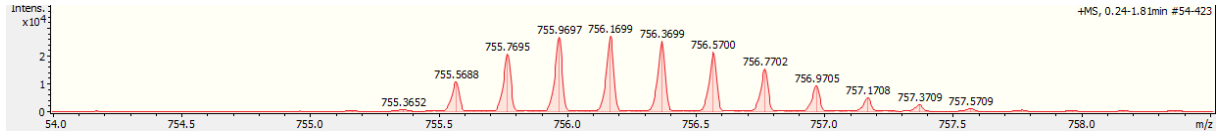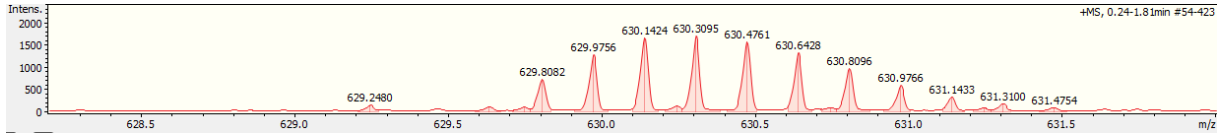



# Compound 20 (PfeA 33-51 C-term (PEG)<sub>7</sub>-Zn<sup>2+</sup>-DOTAM)

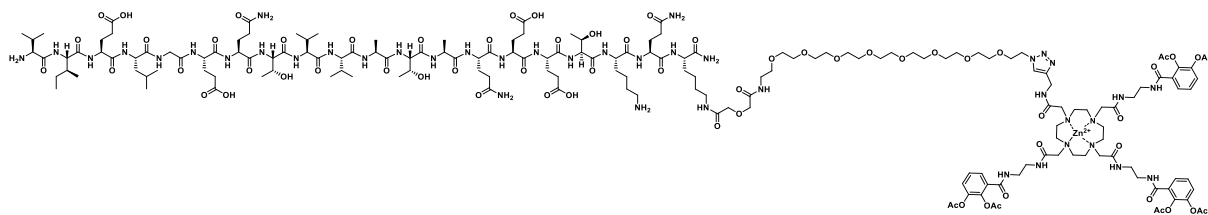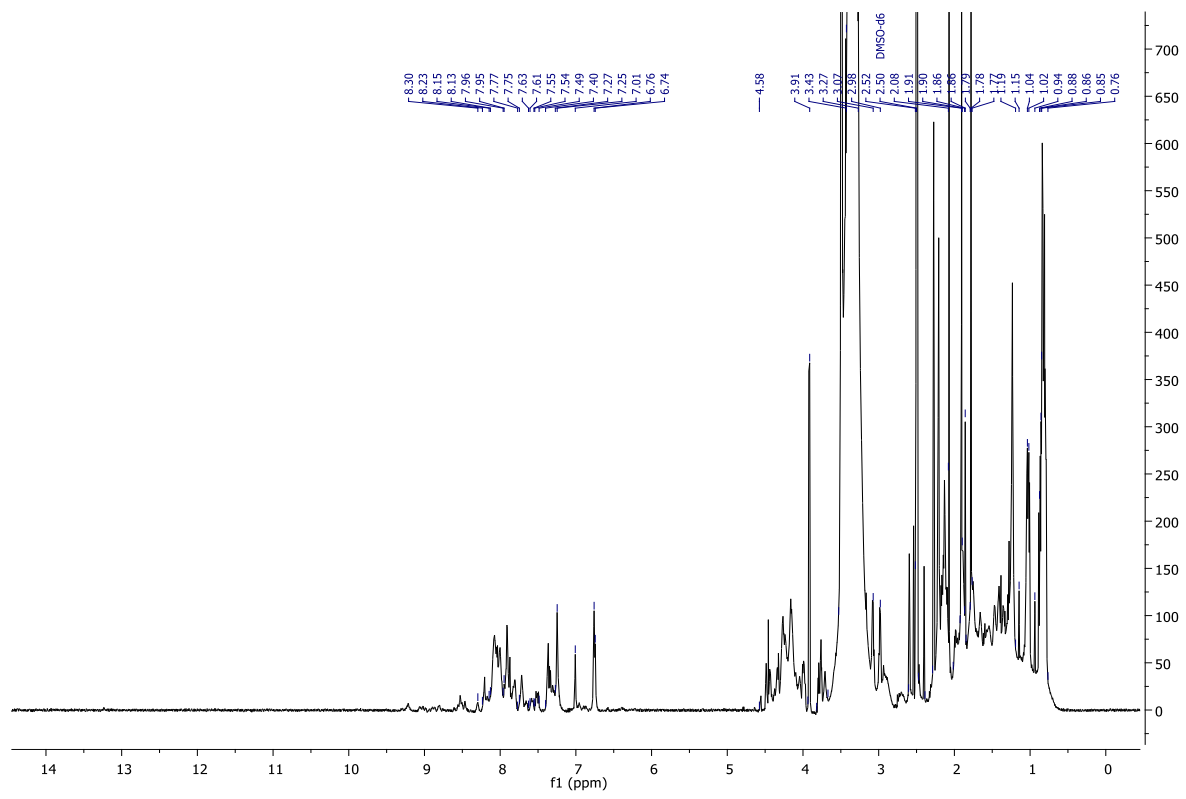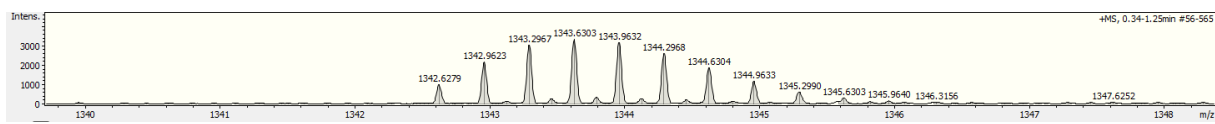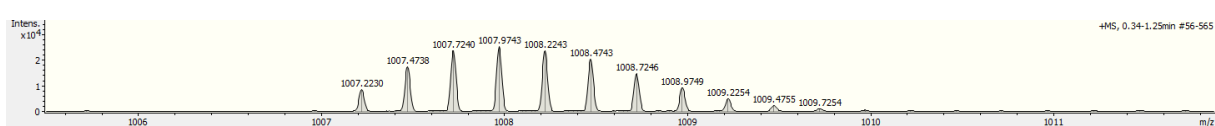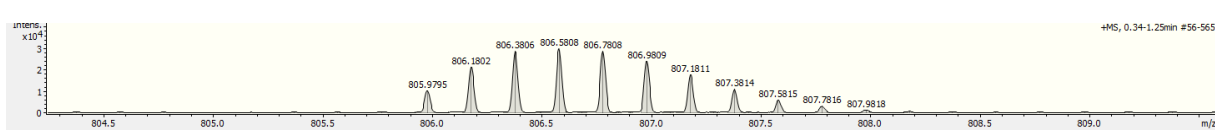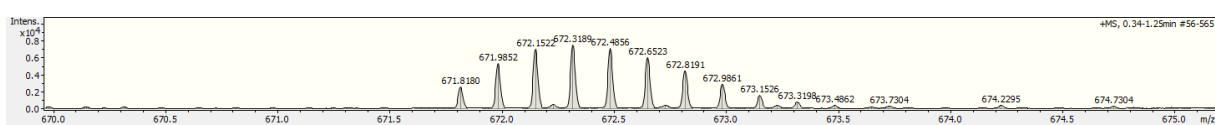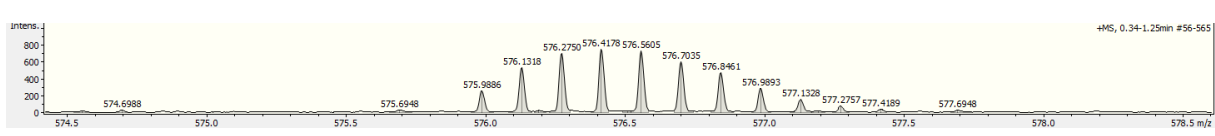

# Compound 21 (*PfeA* 33-51 C-term disulfide-(PEG)<sub>5</sub>-Zn<sup>2+</sup>-DOTAM)

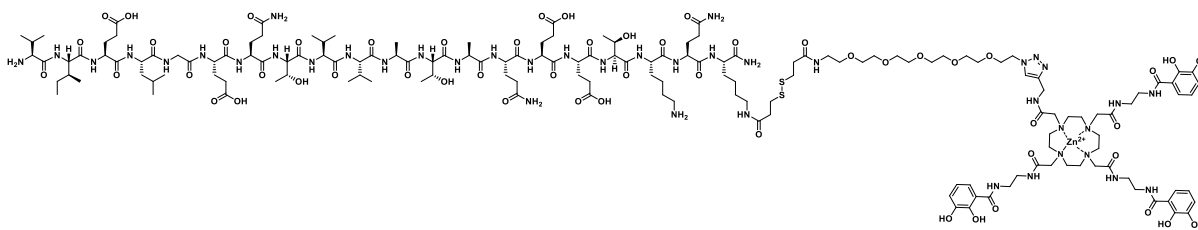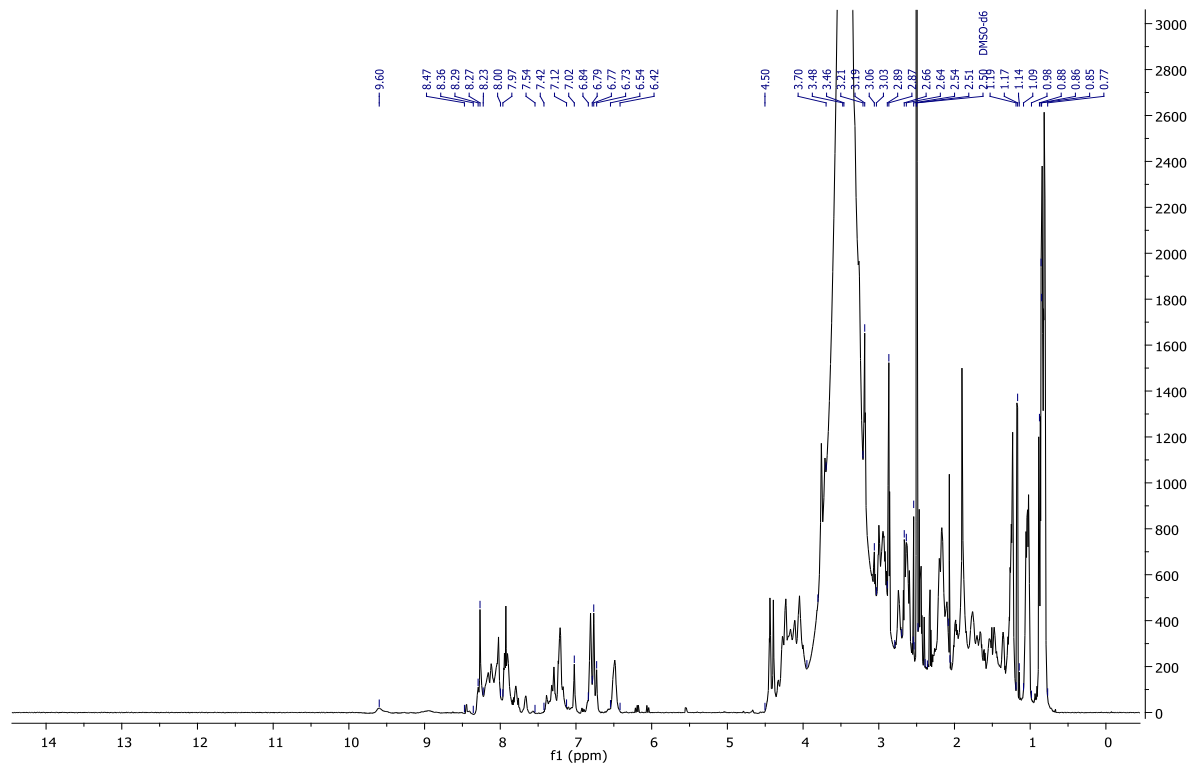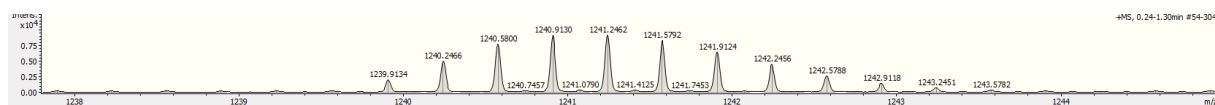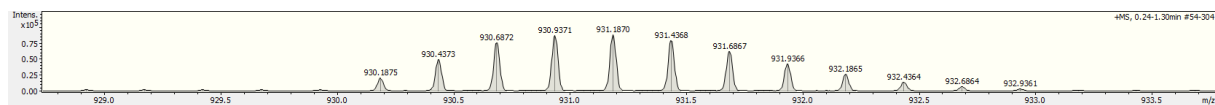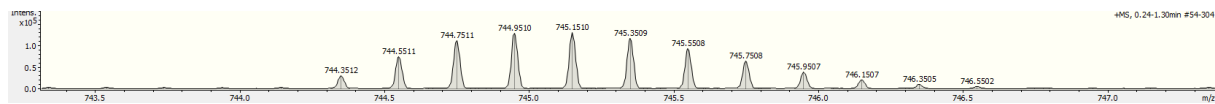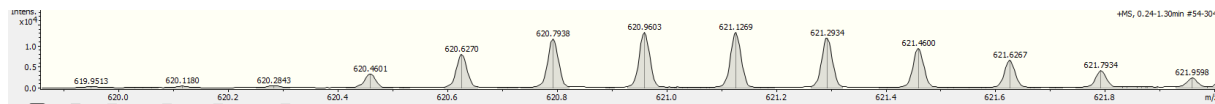





# Compound 23 (*PfeA* 33-51 *N*-term (PEG)<sub>7</sub>-MECAM)

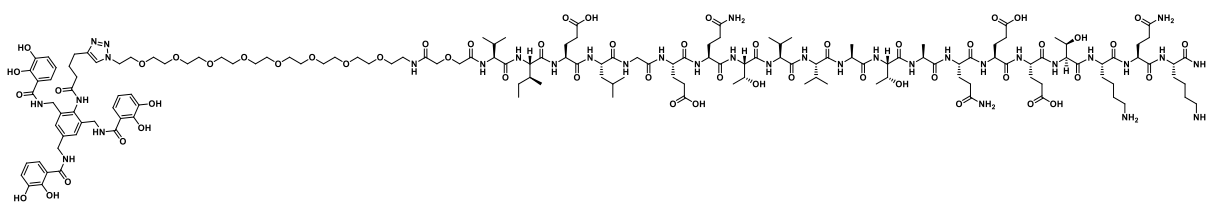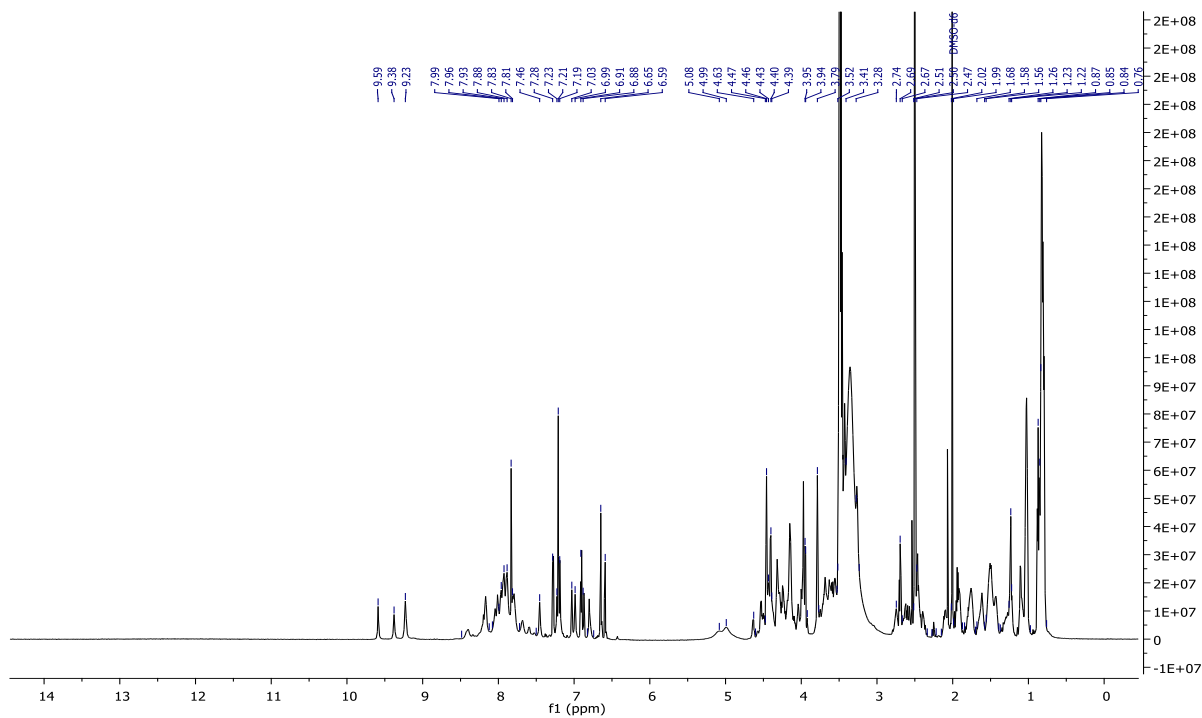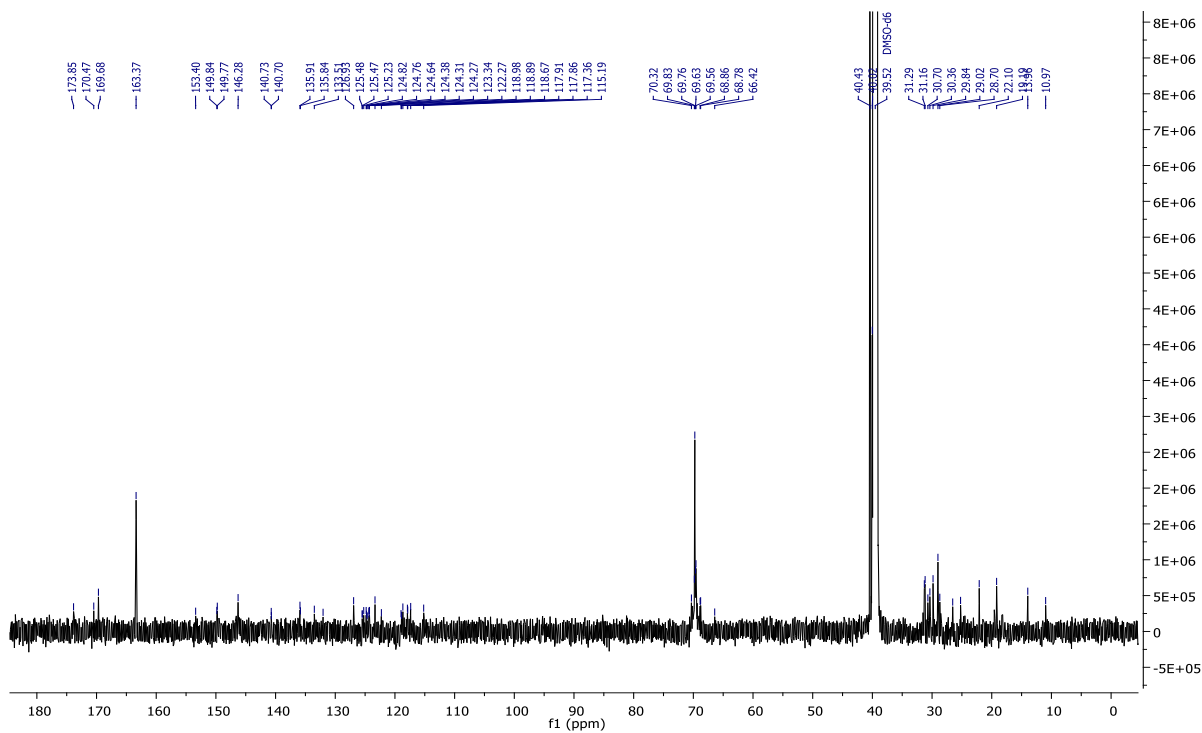

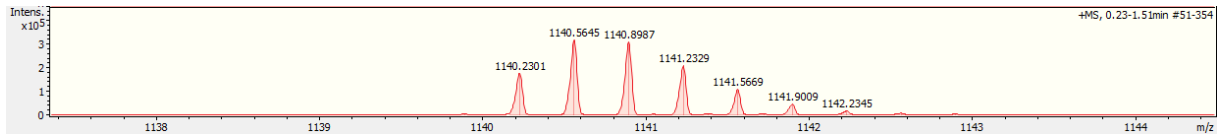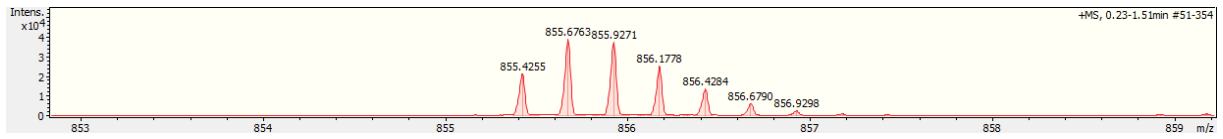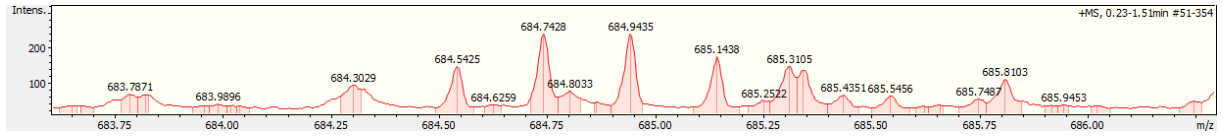

# Compound 24 (*HasR* 122-144 N-term (PEG)<sub>7</sub>-MECAM)

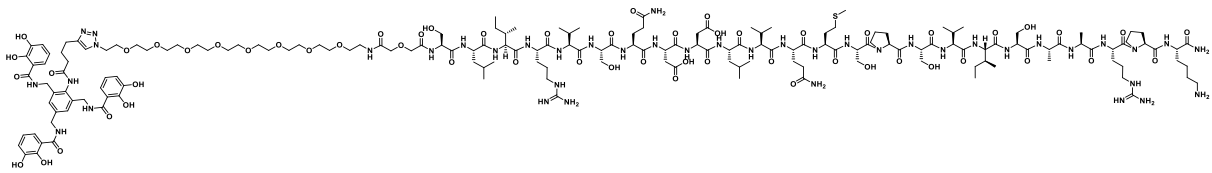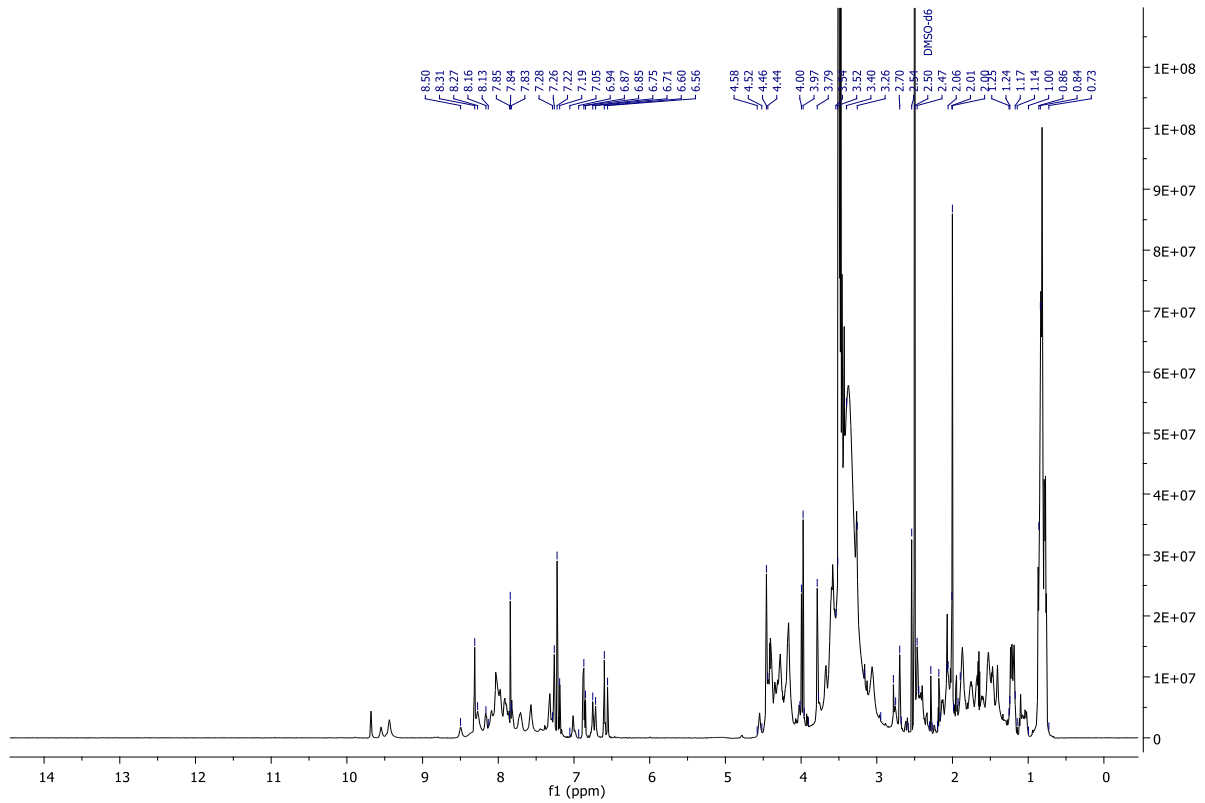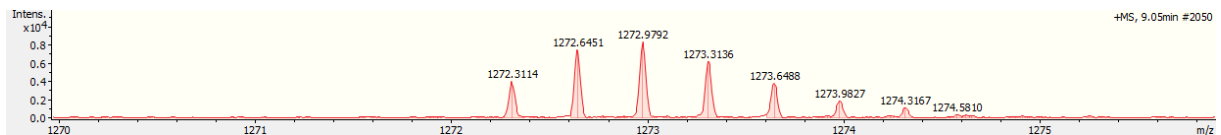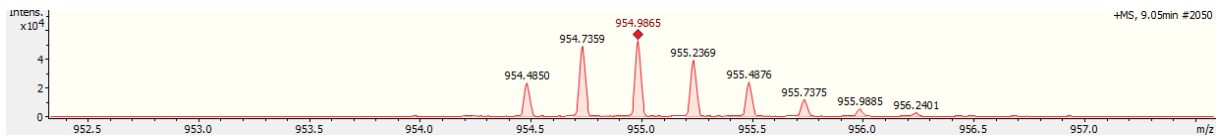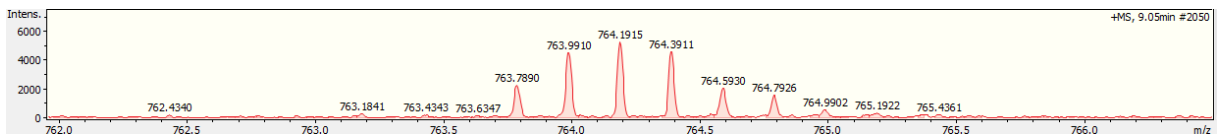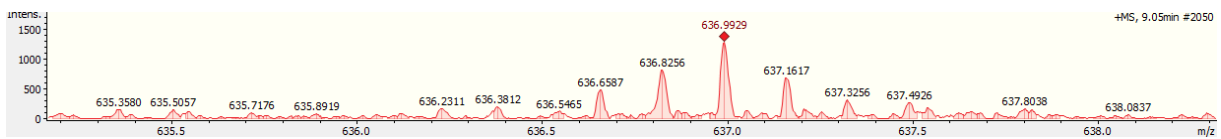



# Compound 26 (*PfeA* 37-46 N-term (PEG)<sub>7</sub>-MECAM)

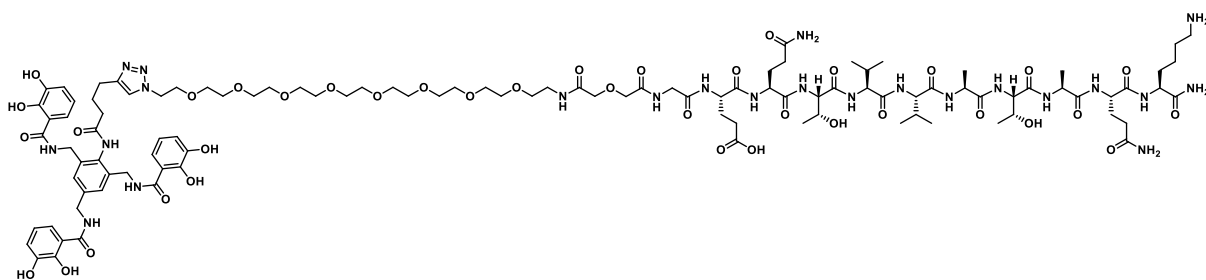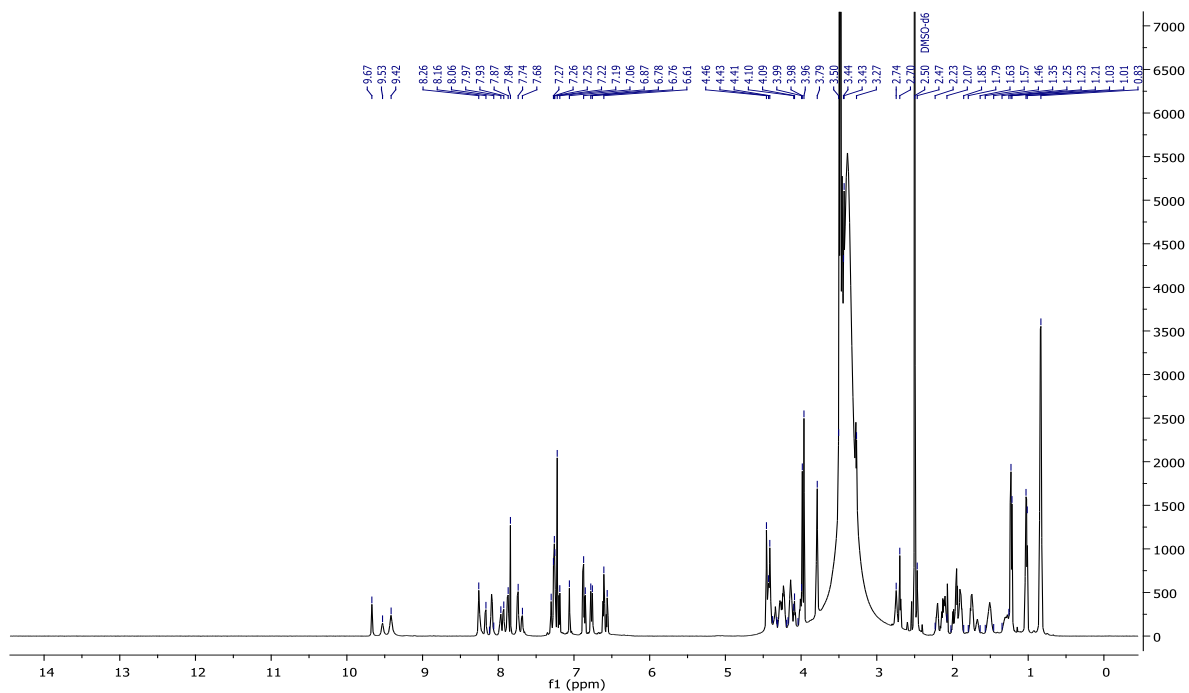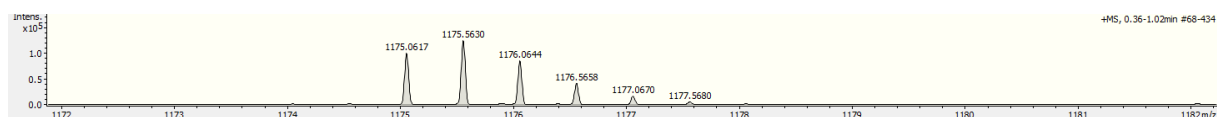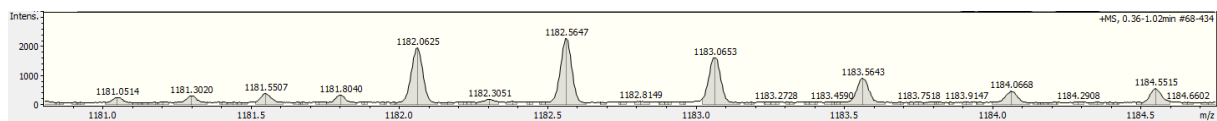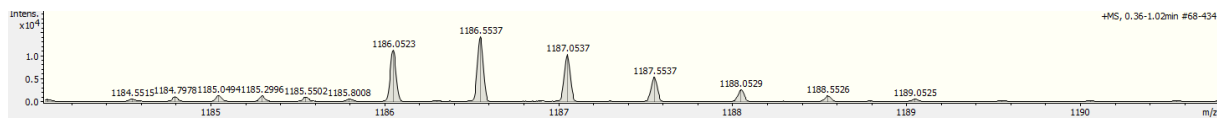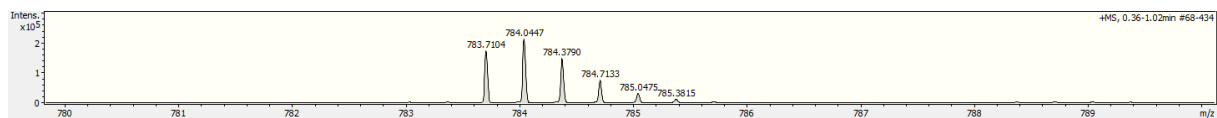

# Compound 27 (*HasR* 129-138 N-term (PEG)<sub>7</sub>-MECAM)

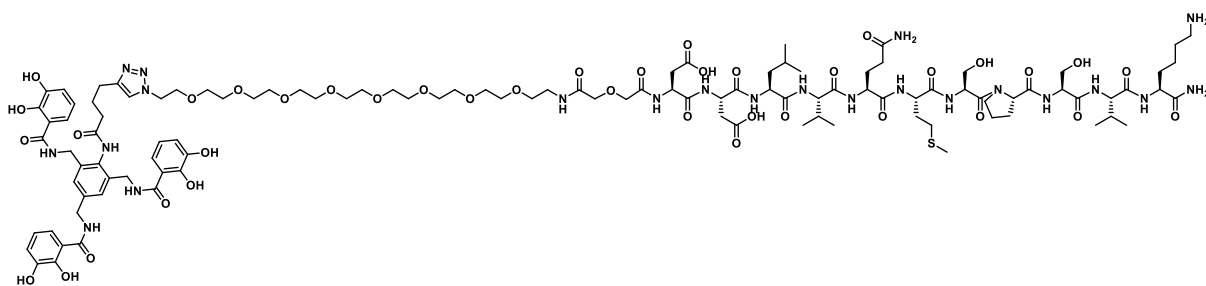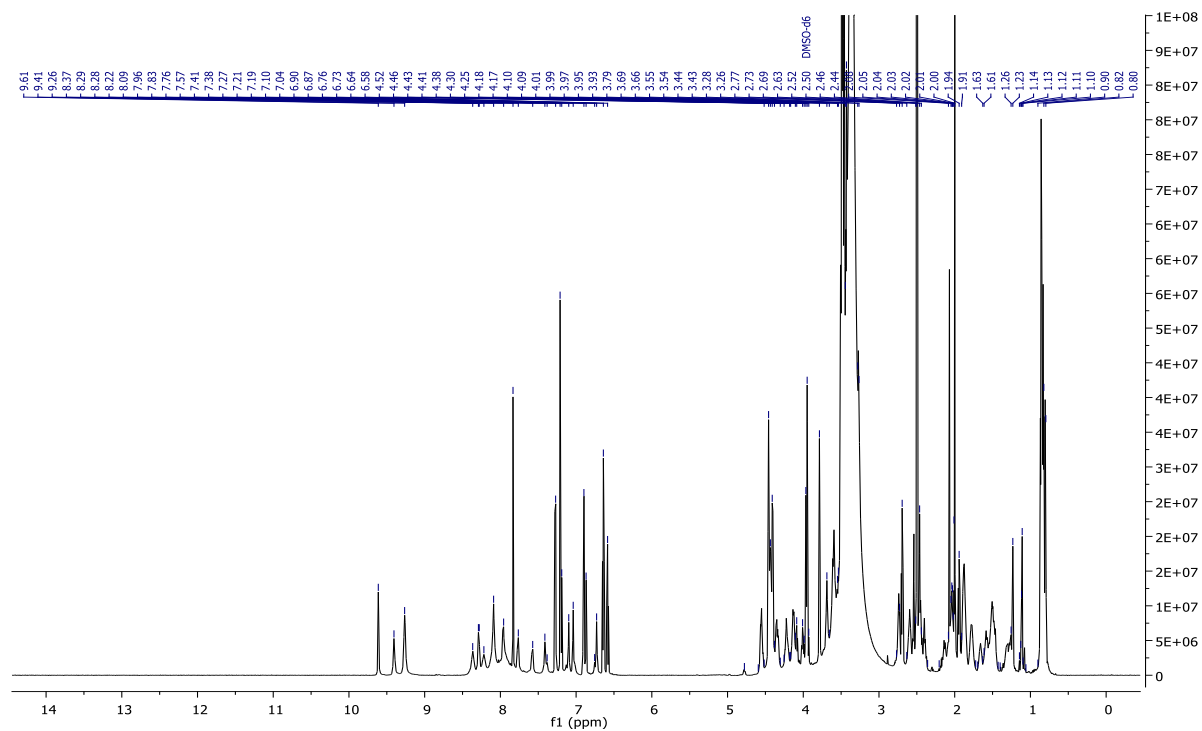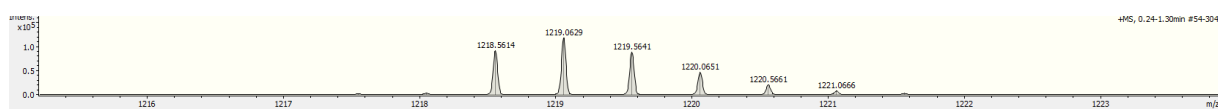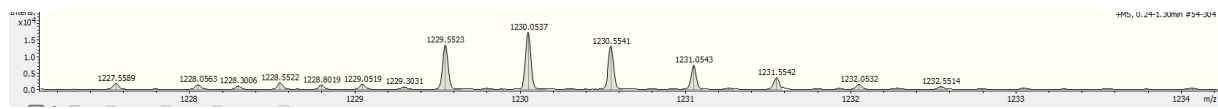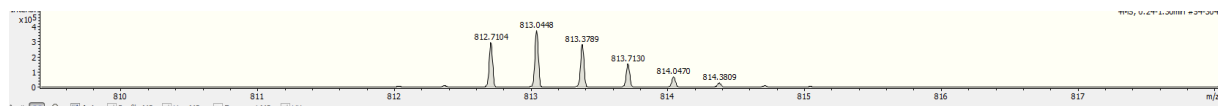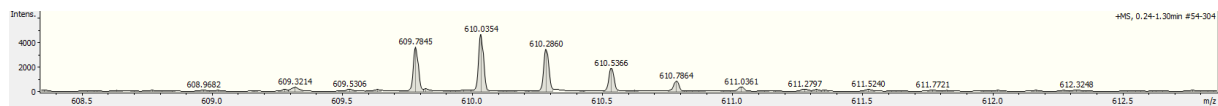





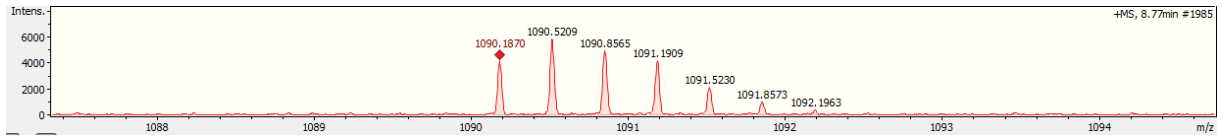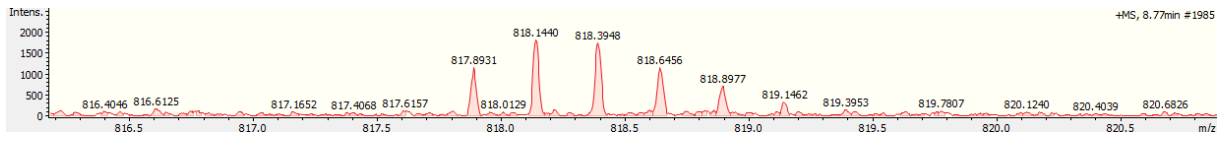



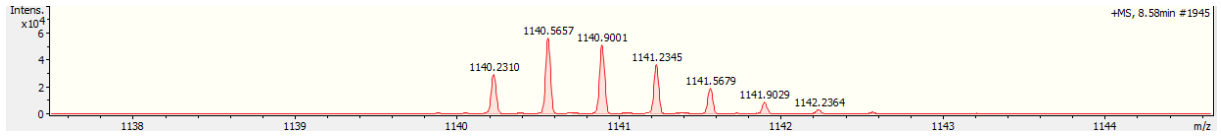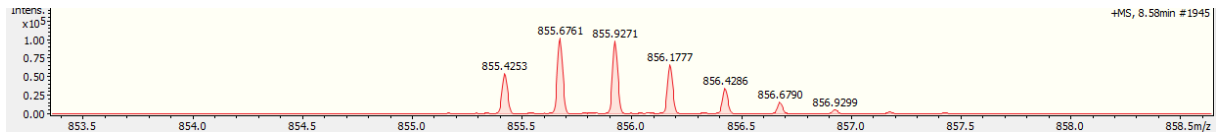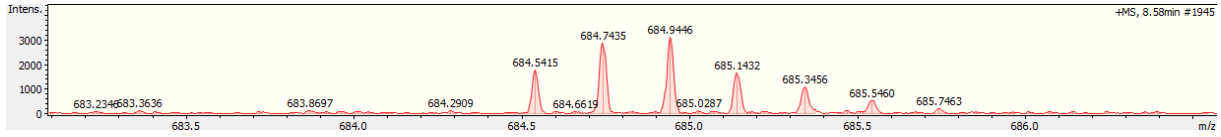

# Compound 30 (*HasR* 122-144 C-term (PEG)<sub>7</sub>-MECAM)

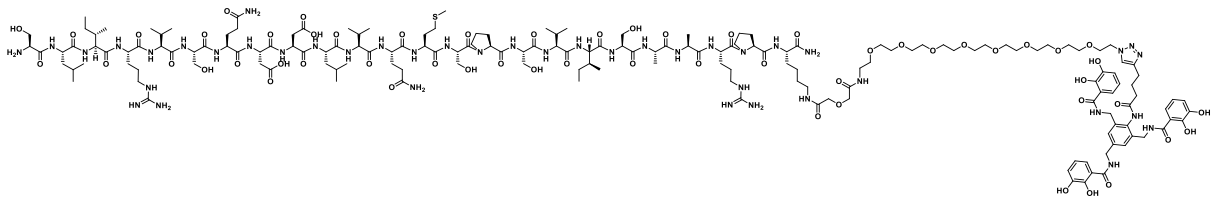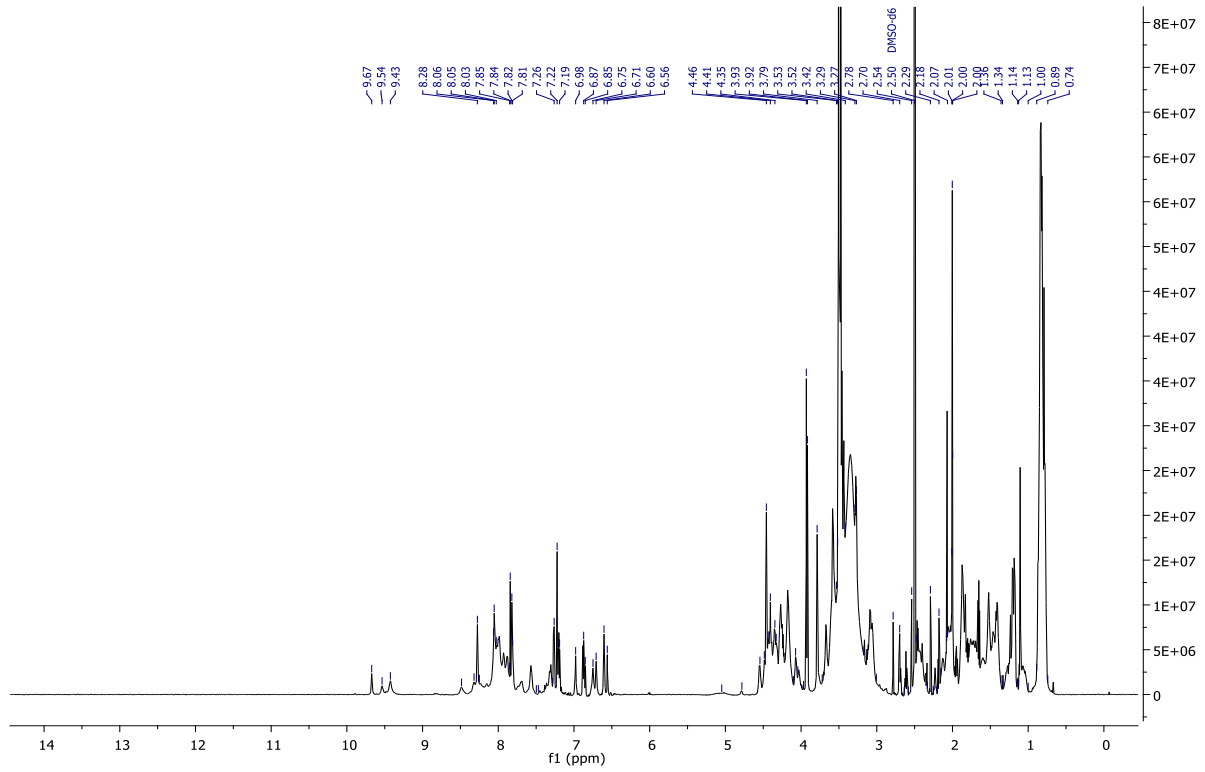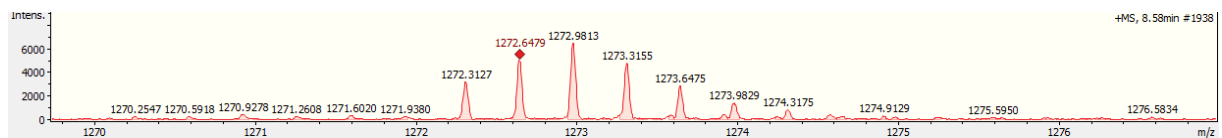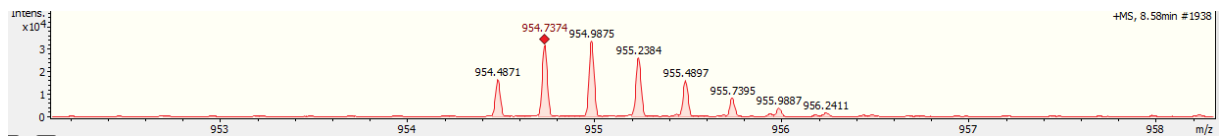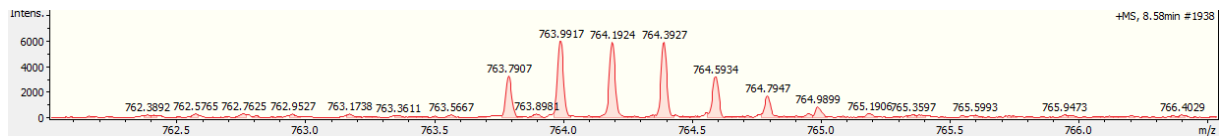



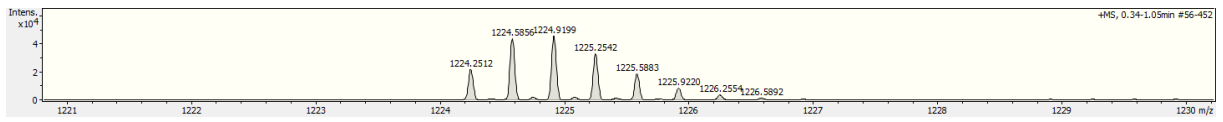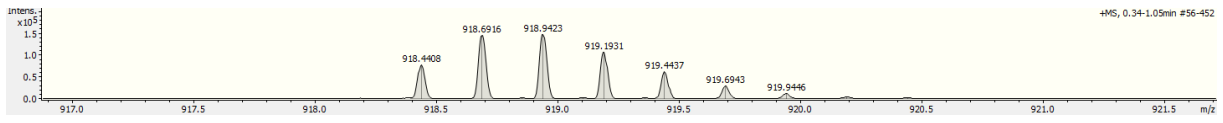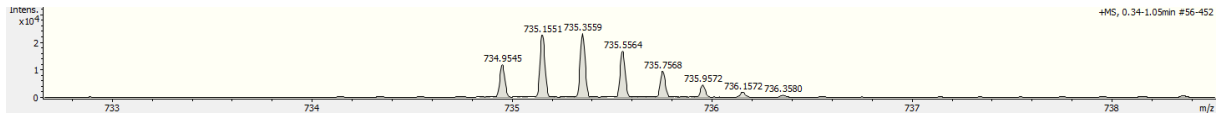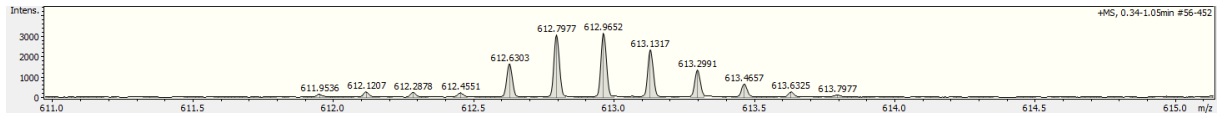



# Compound C33 (*FpvA* 121-139 C-term 2,3-dihydroxybenzamide)

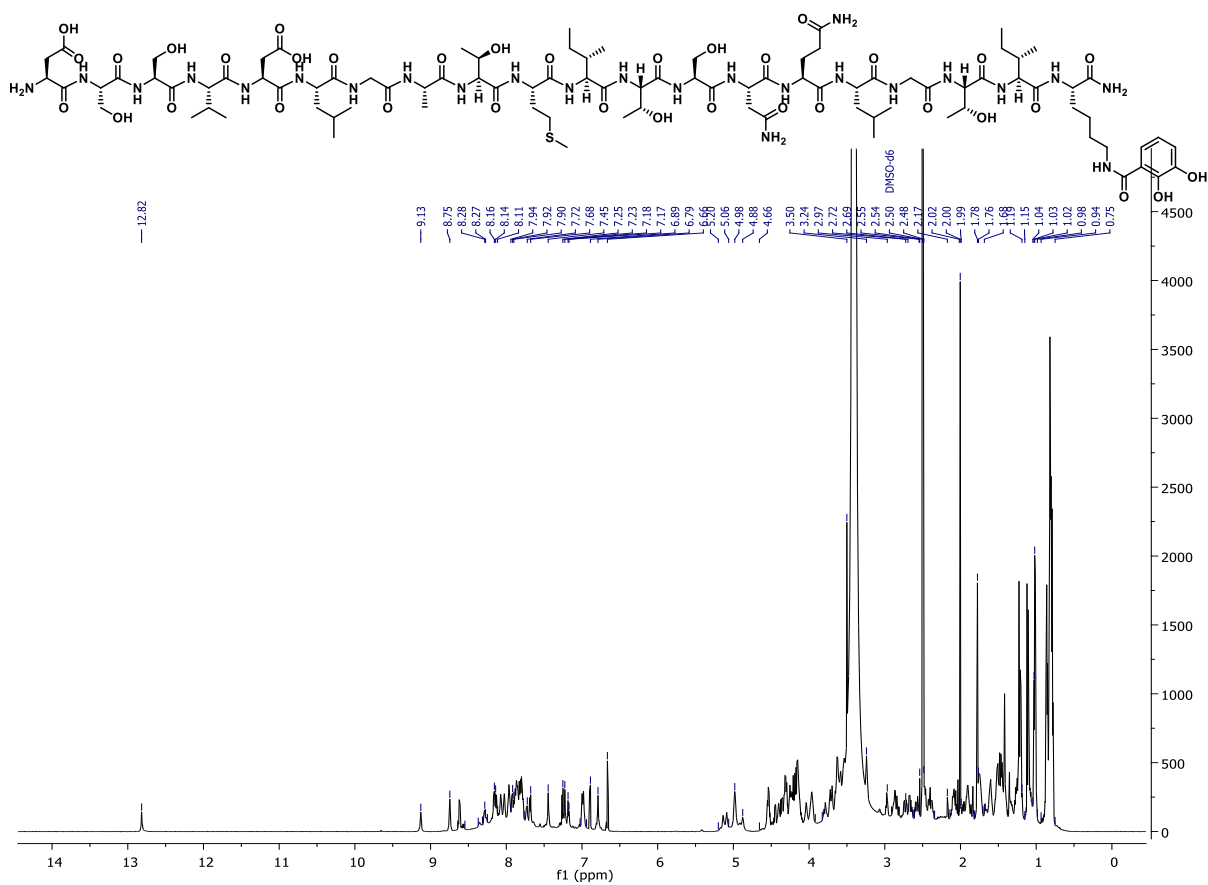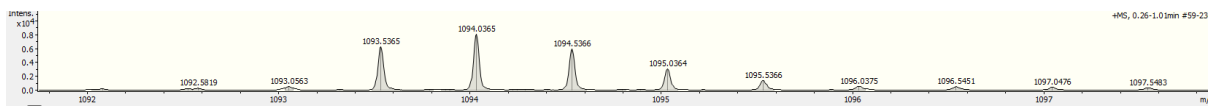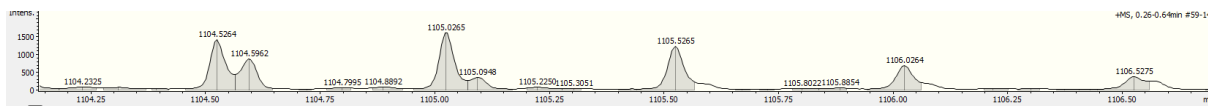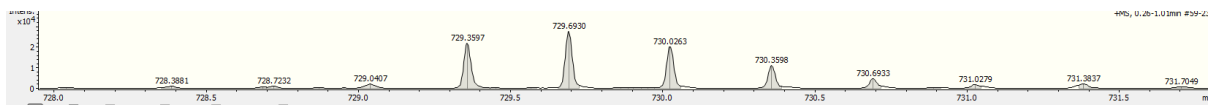



# Compound C34 (PfeA 33-51 C-term 2,3-dihydroxybenzamide)

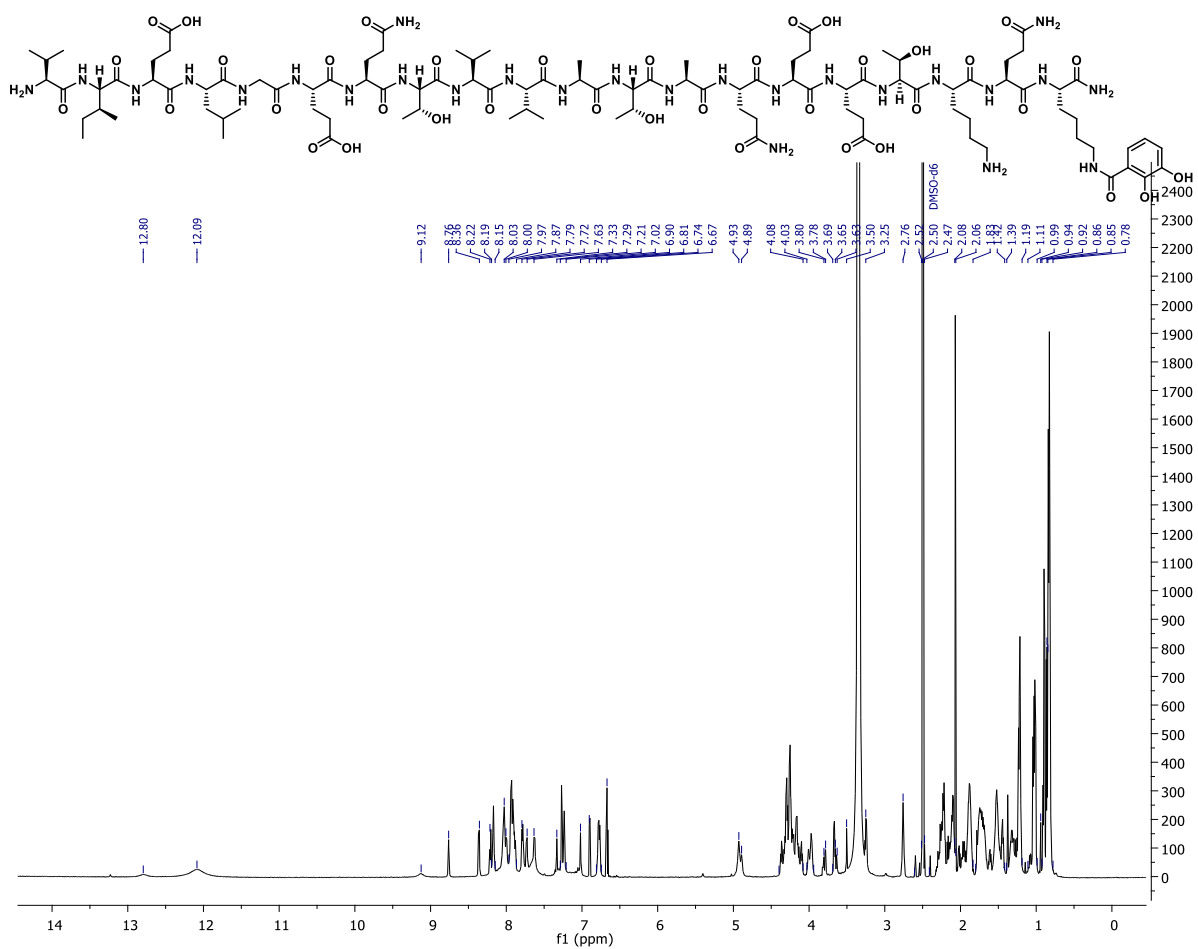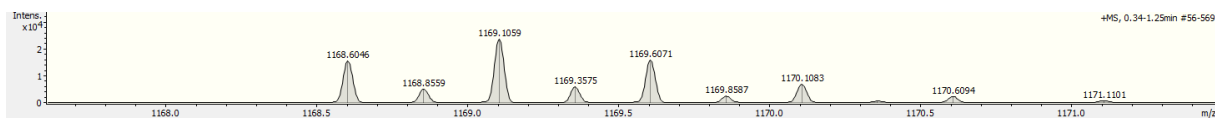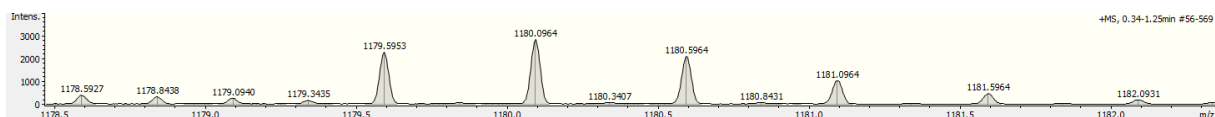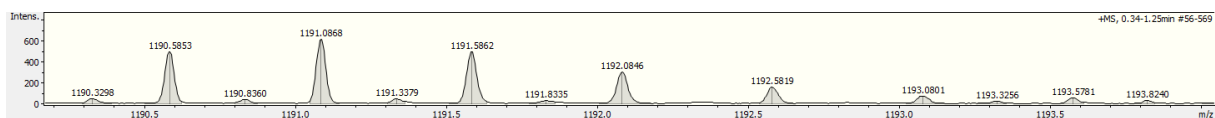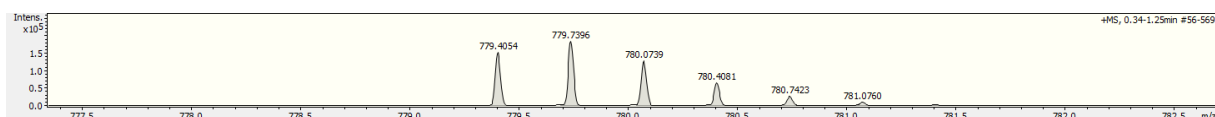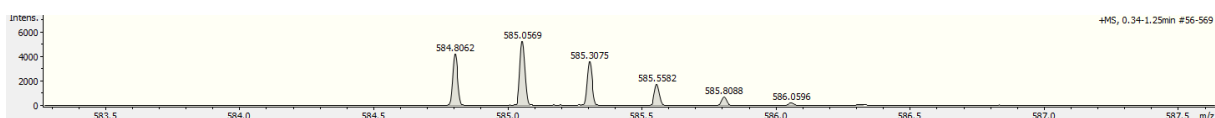

**Compound N33<sub>L</sub> (FpvA 121-139 N-term 2,3-dihydroxybenzamide)**

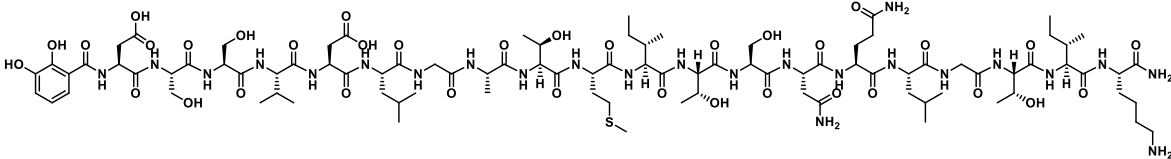

**Window Display Report**

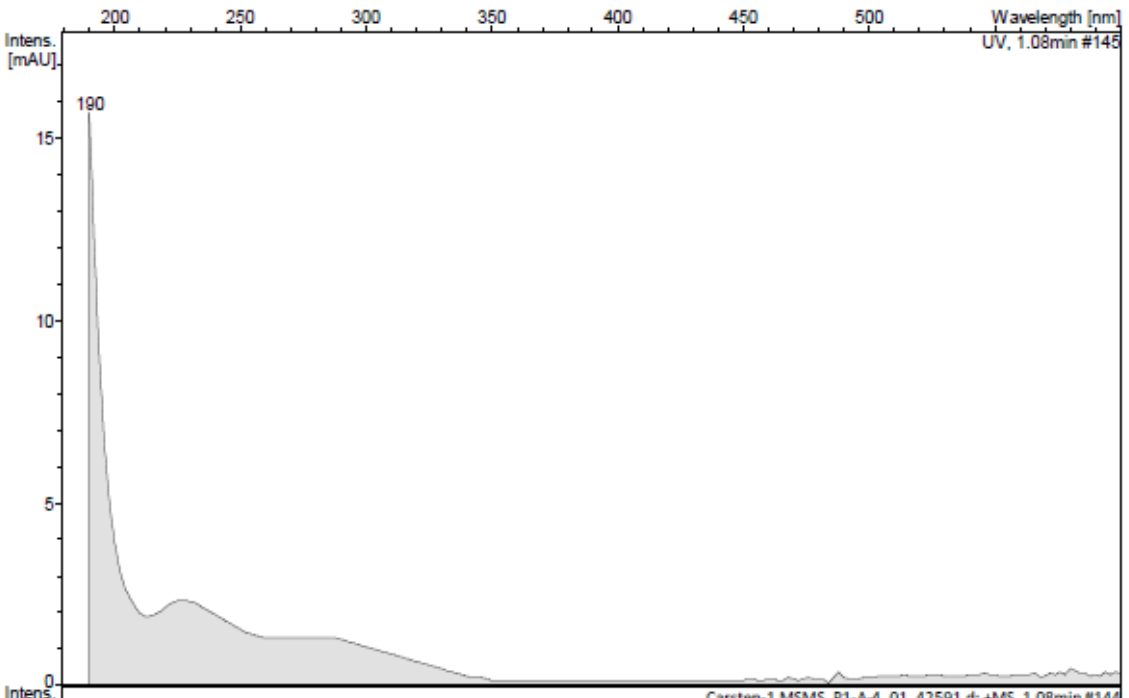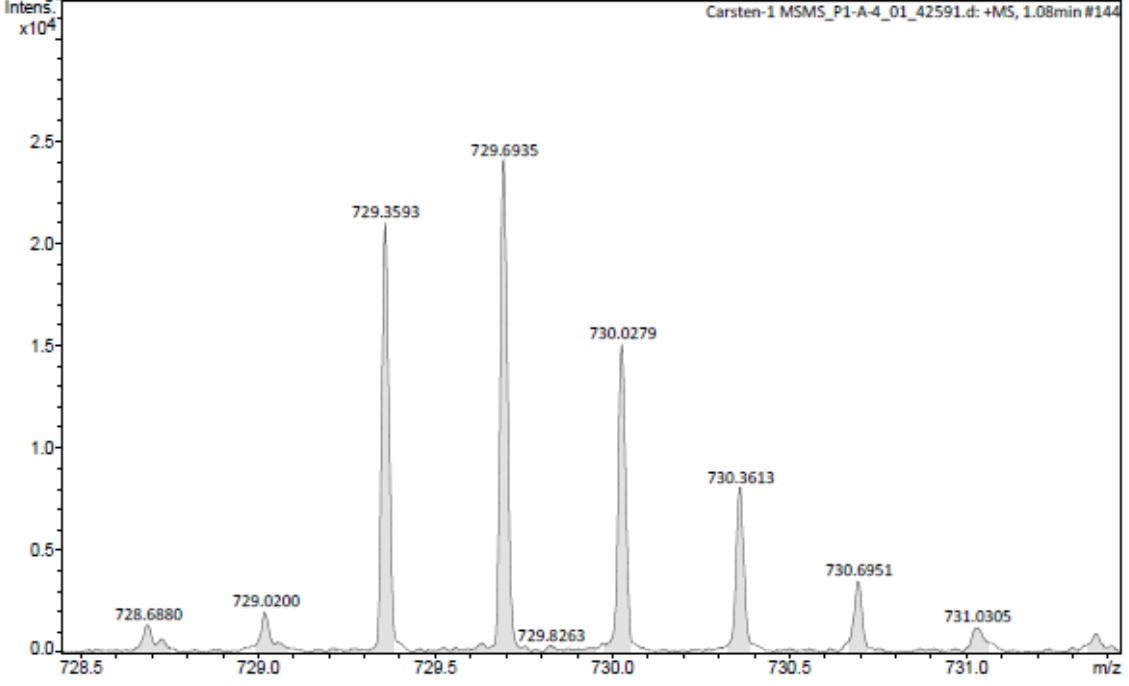

# Window Display Report

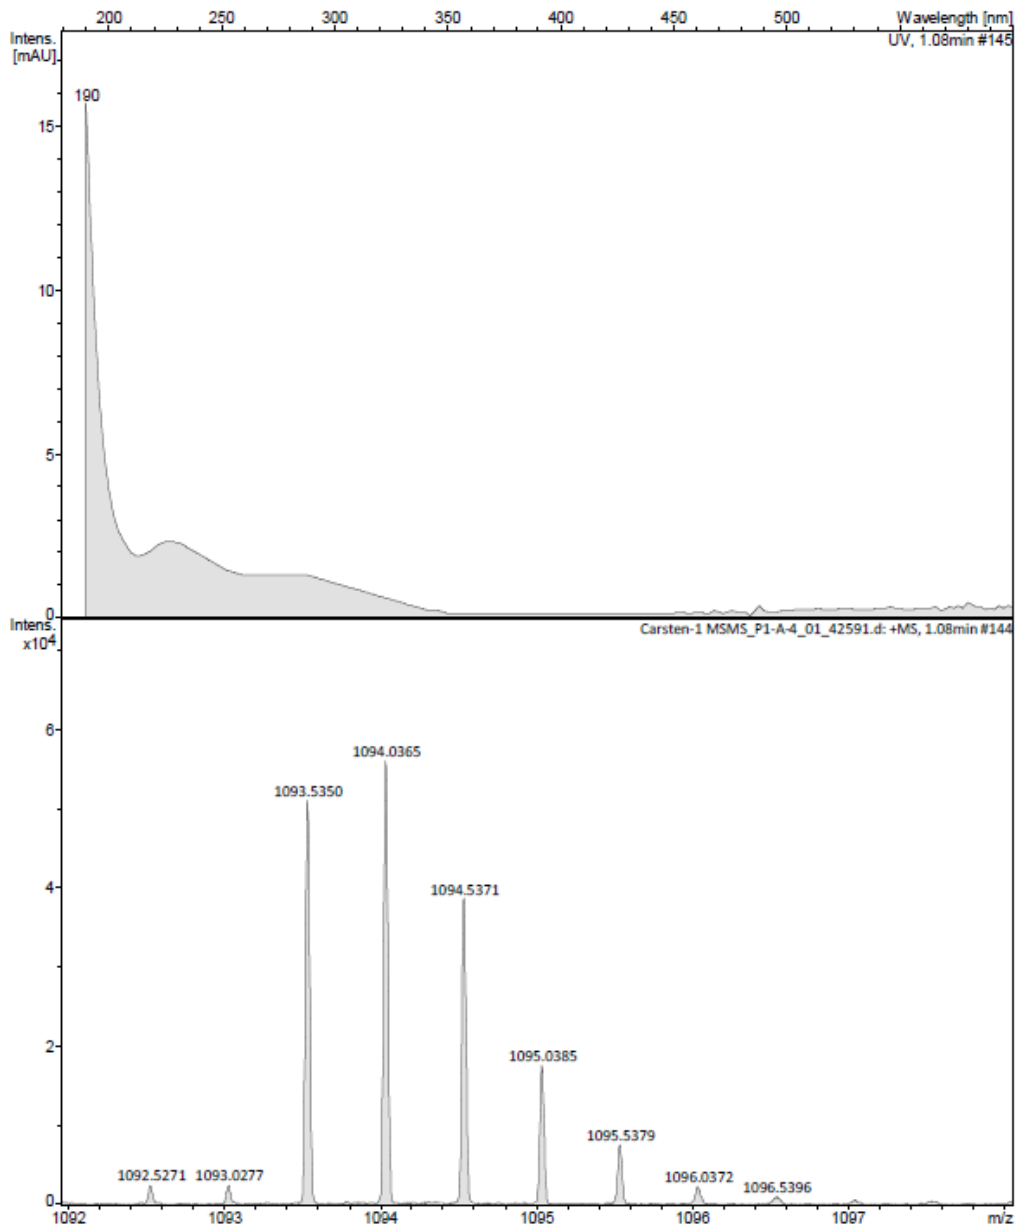

# Window Display Report

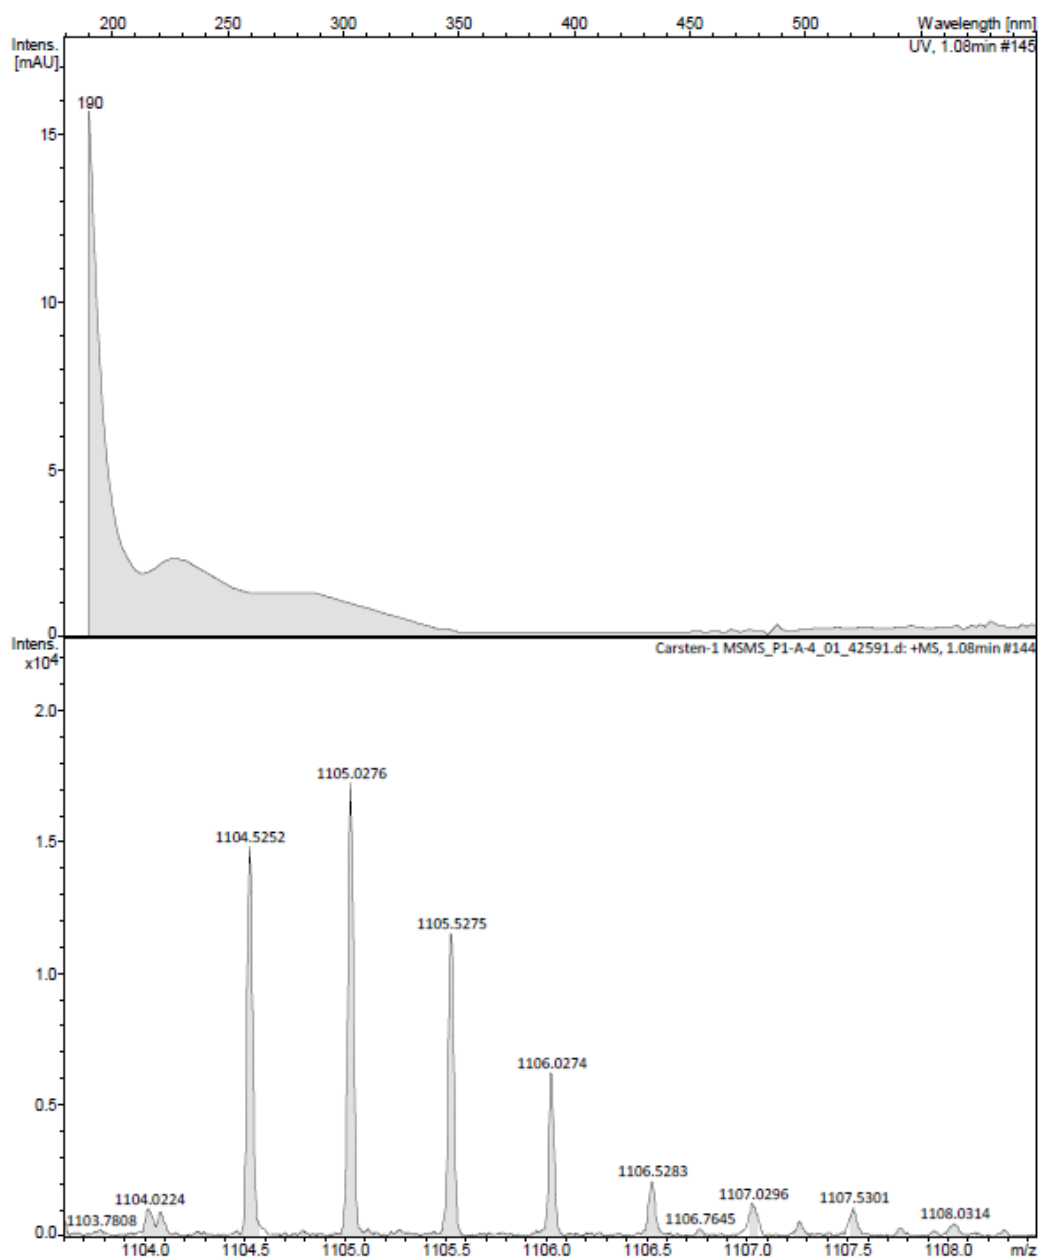

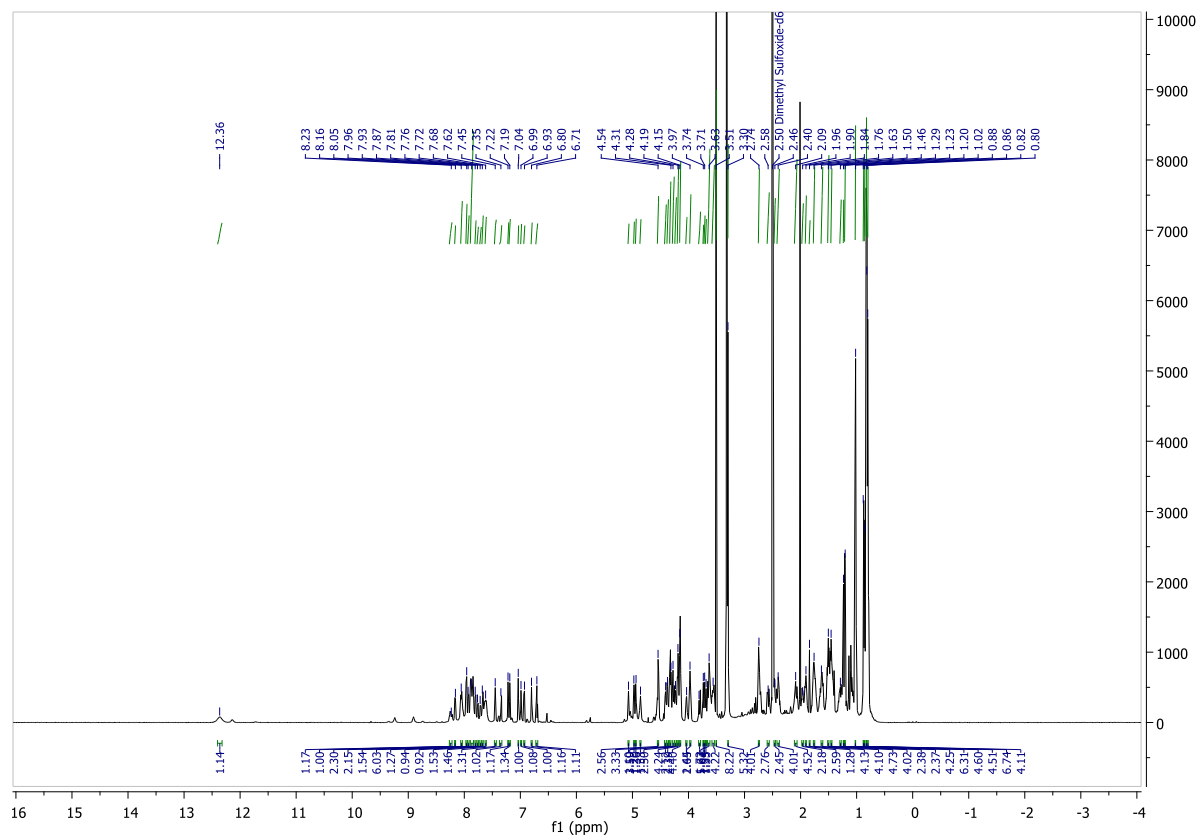

**Compound N34<sub>L</sub> (PfeA 33-51 N-term 2,3-dihydroxybenzamide)**

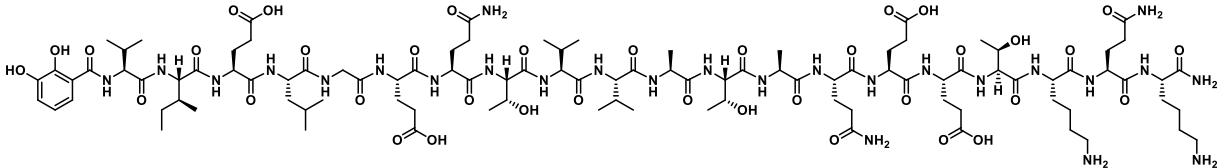

**Window Display Report**

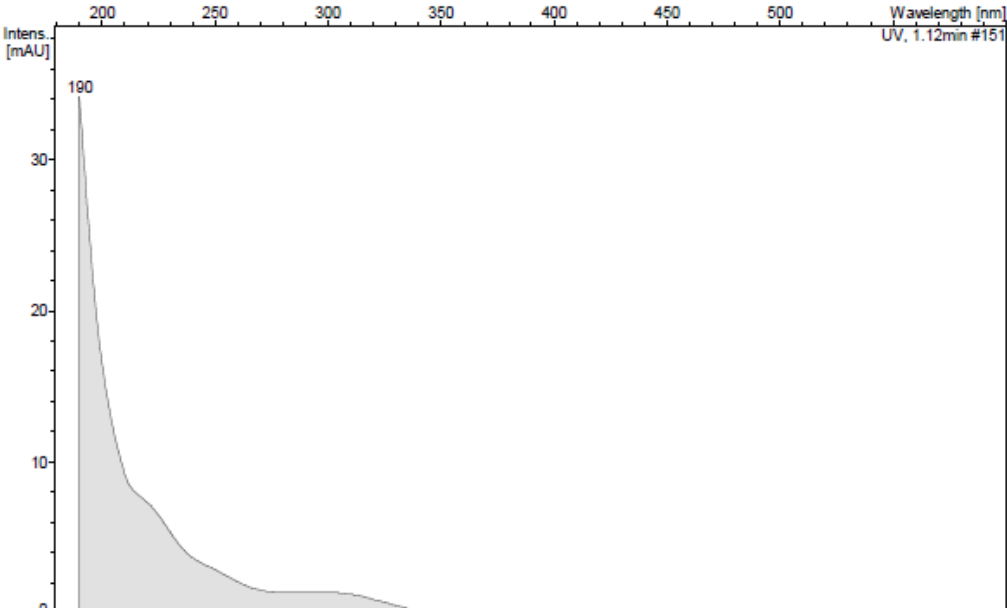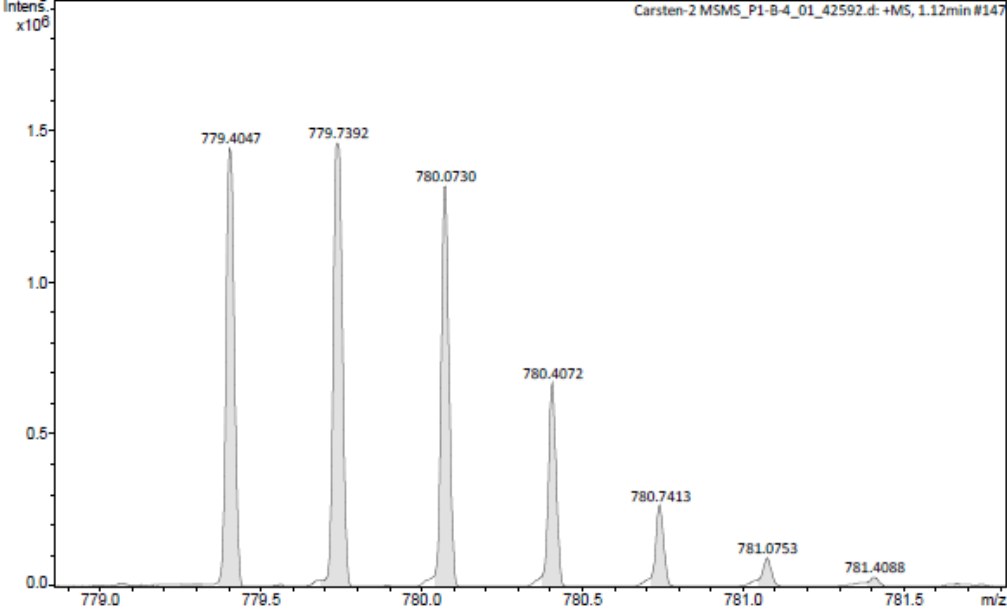

# Window Display Report

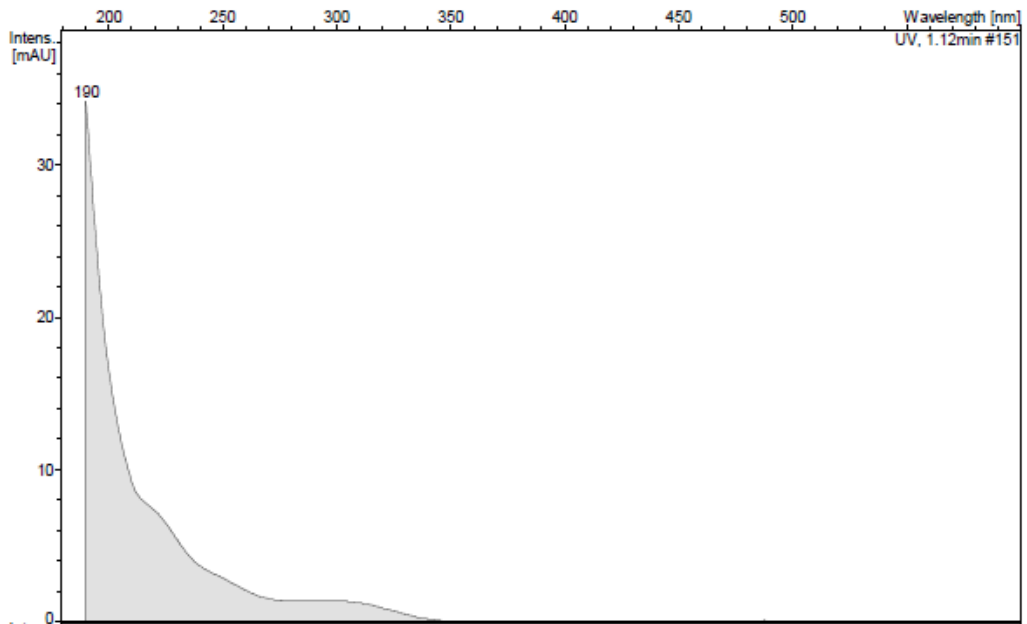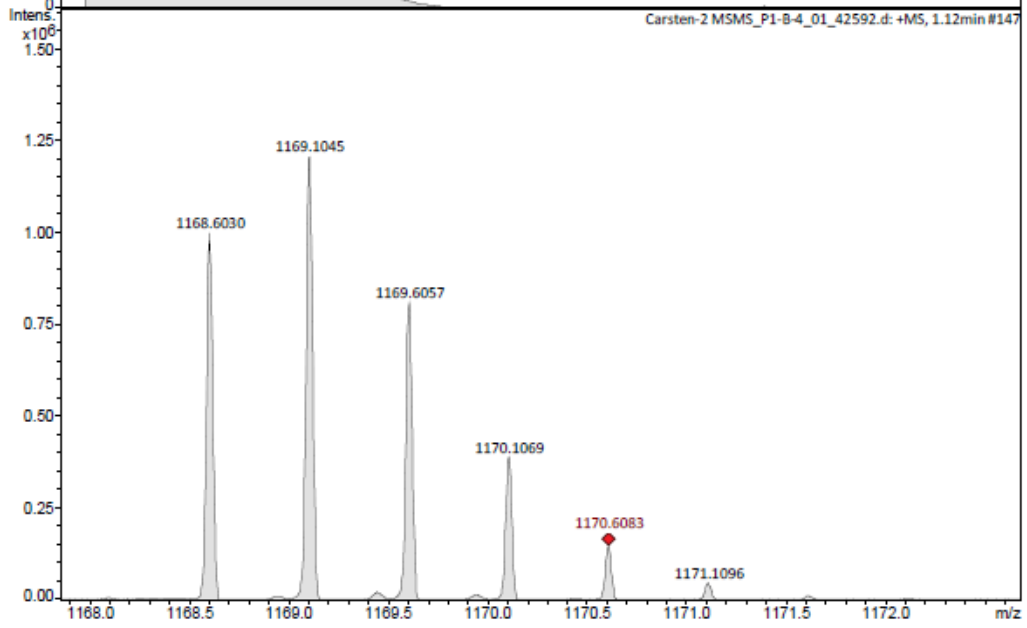

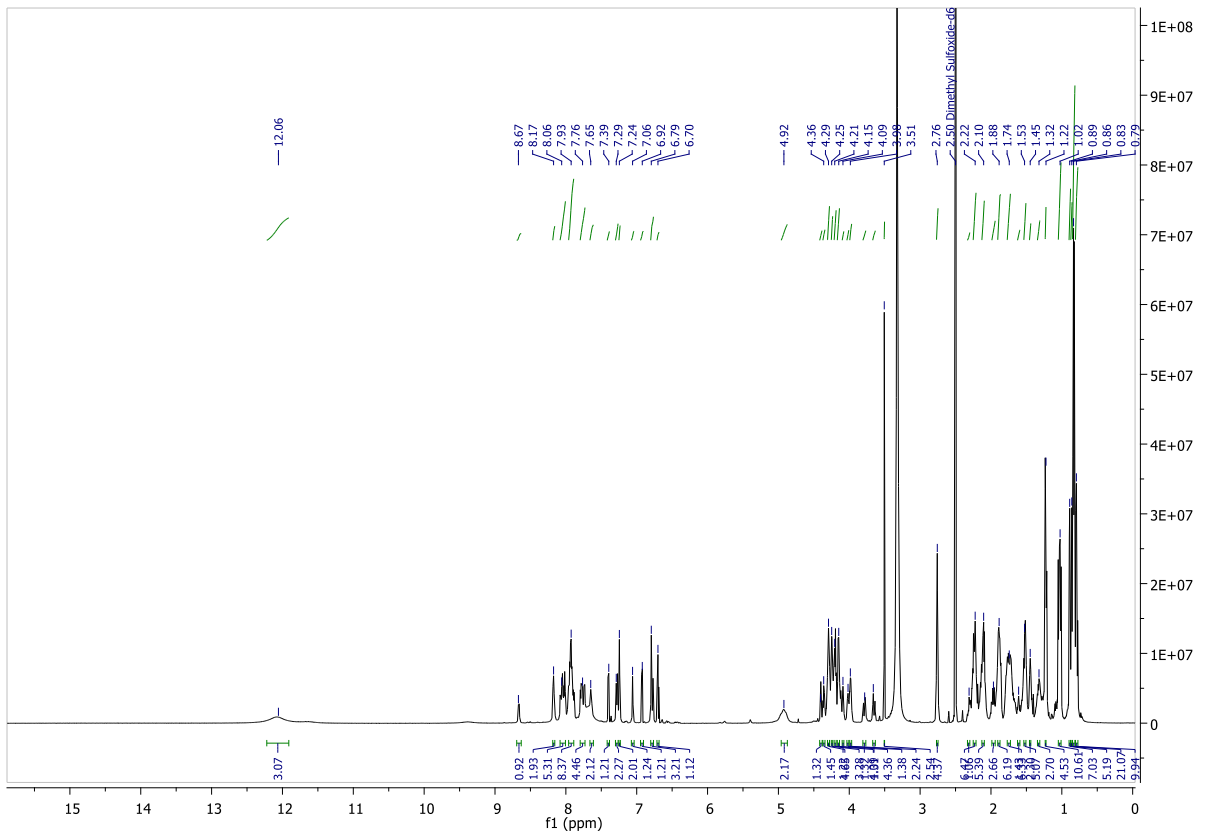





# Window Display Report

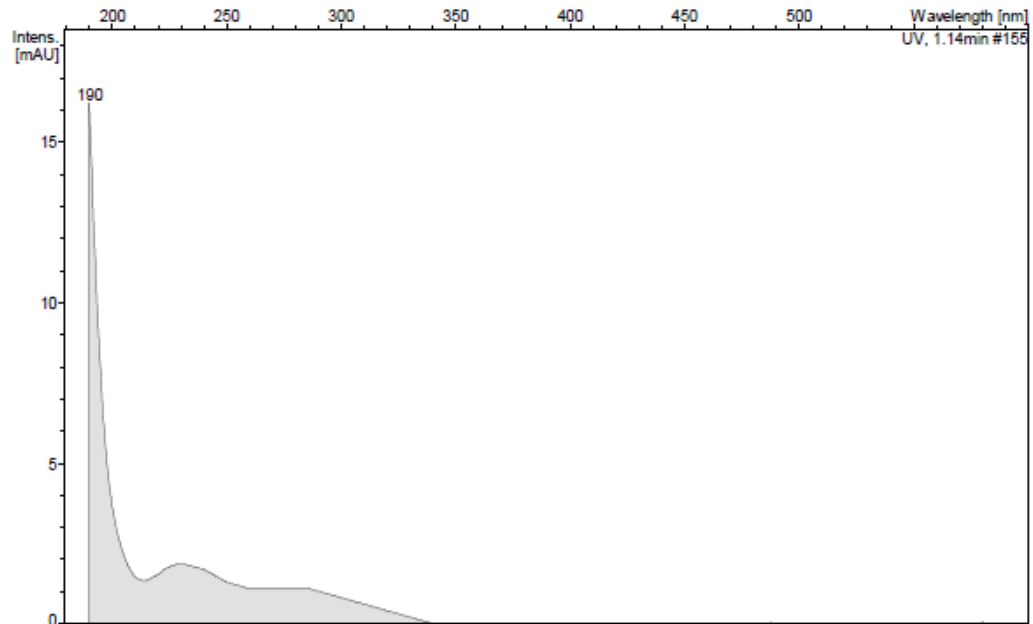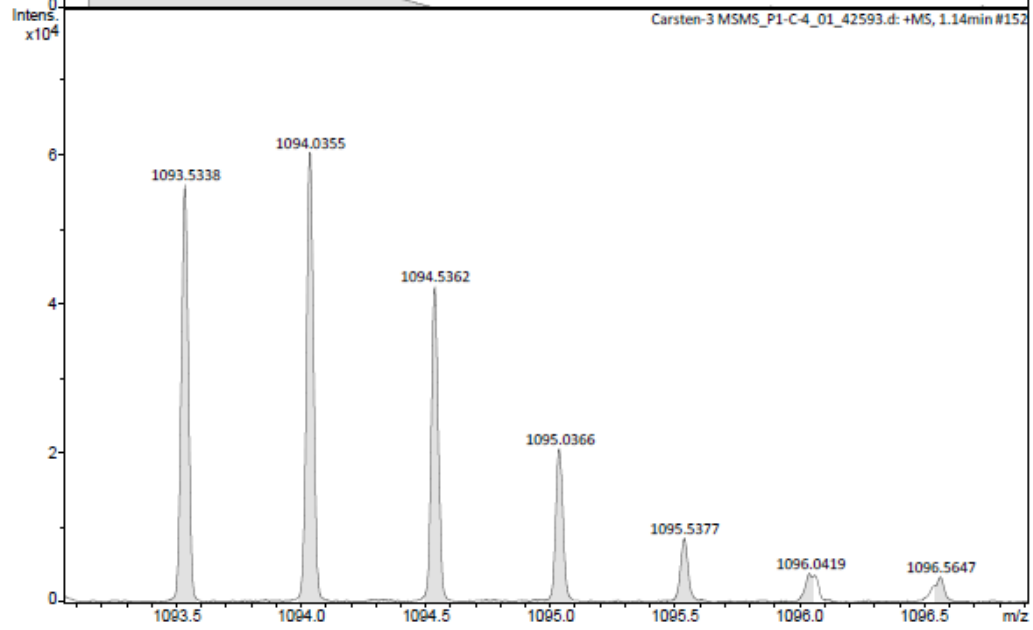





# Window Display Report

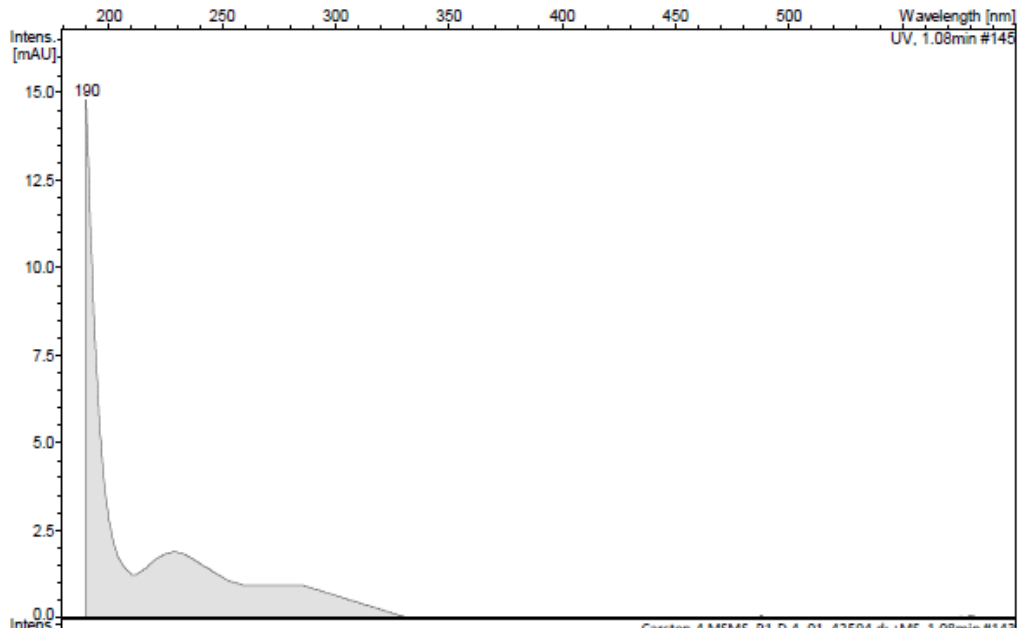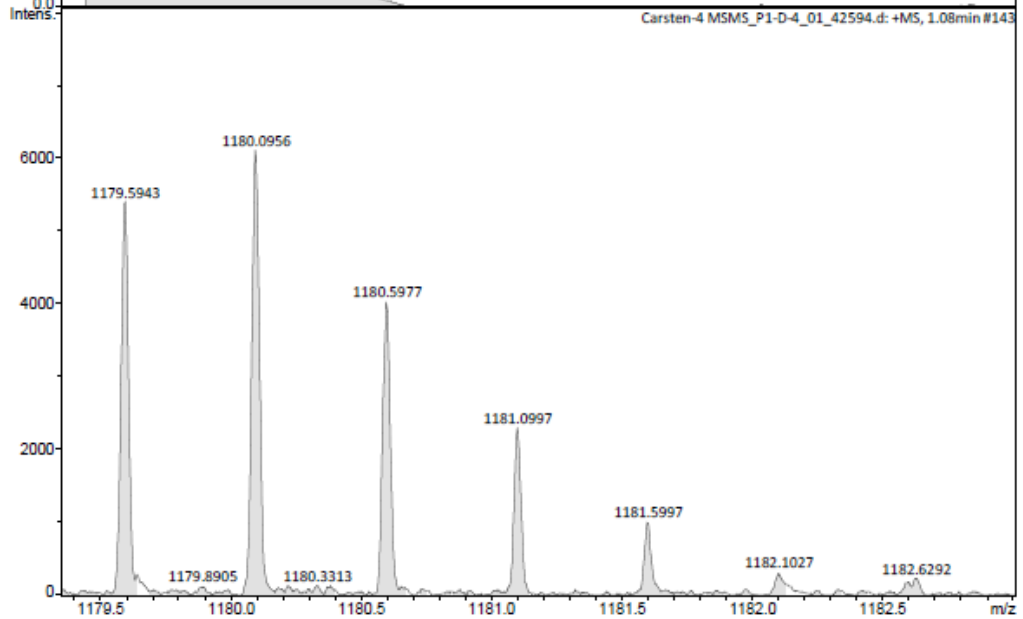

# Window Display Report

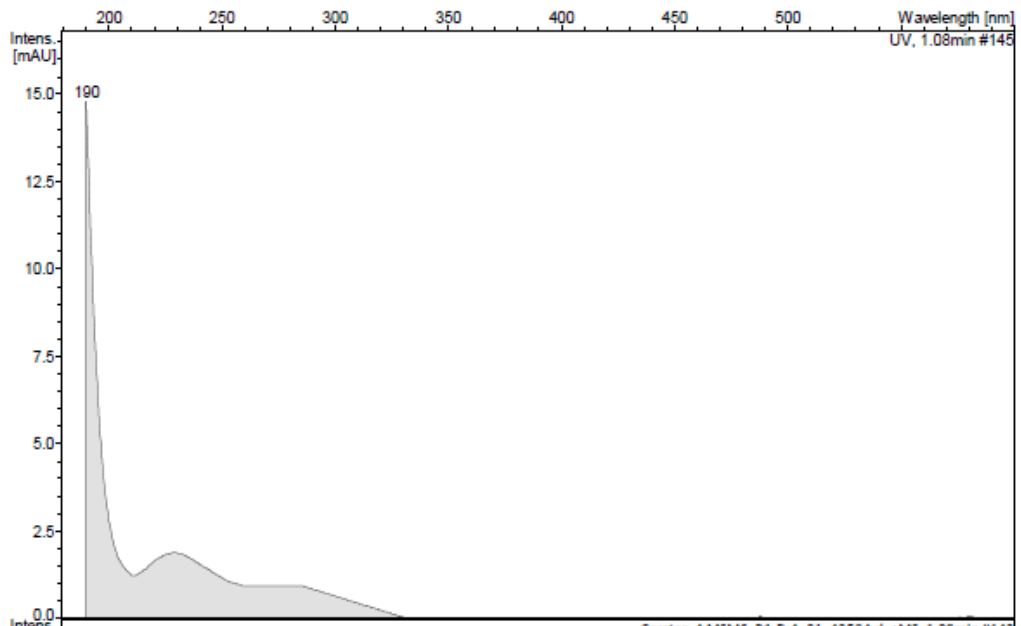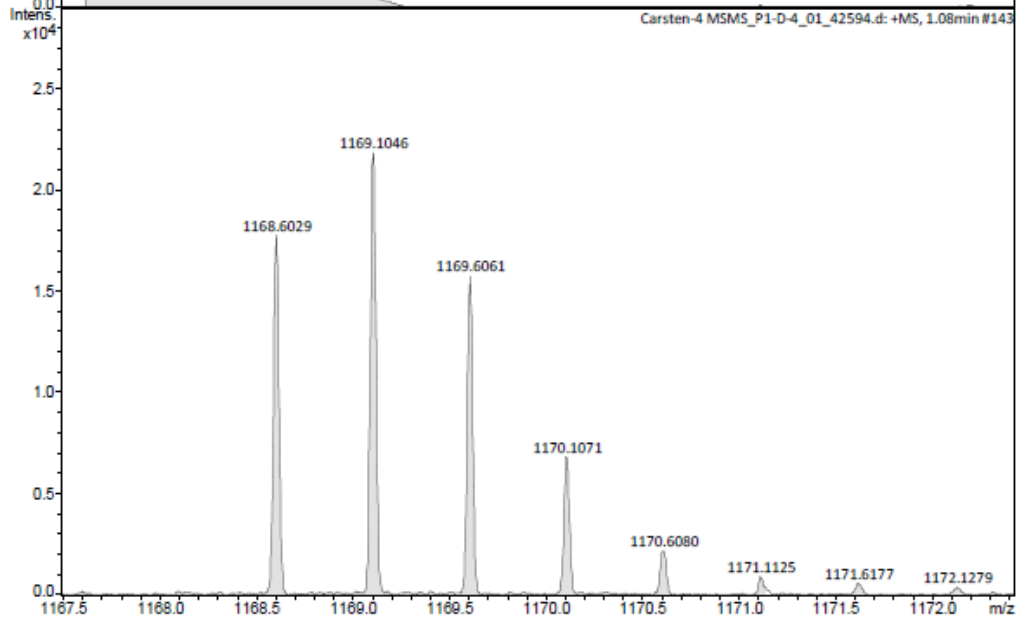

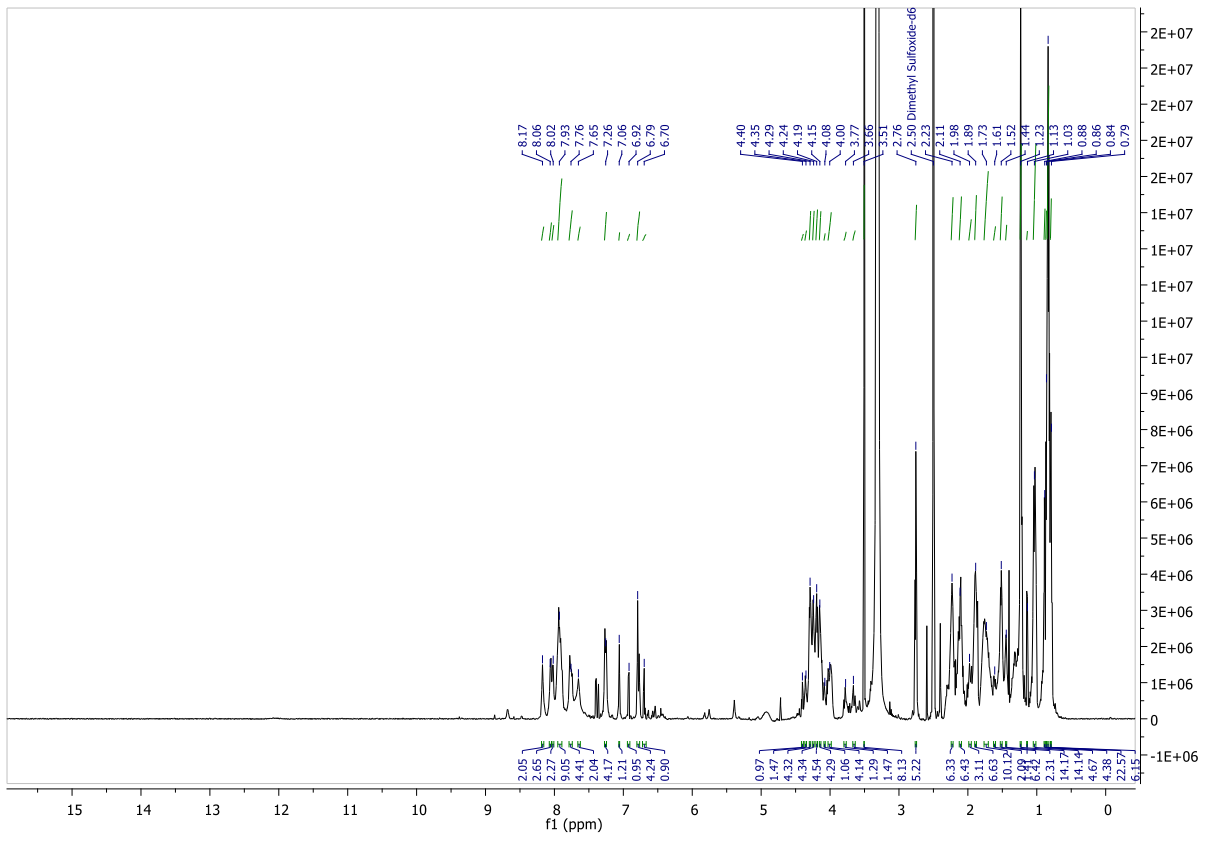

# Compound 36

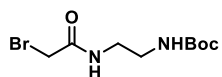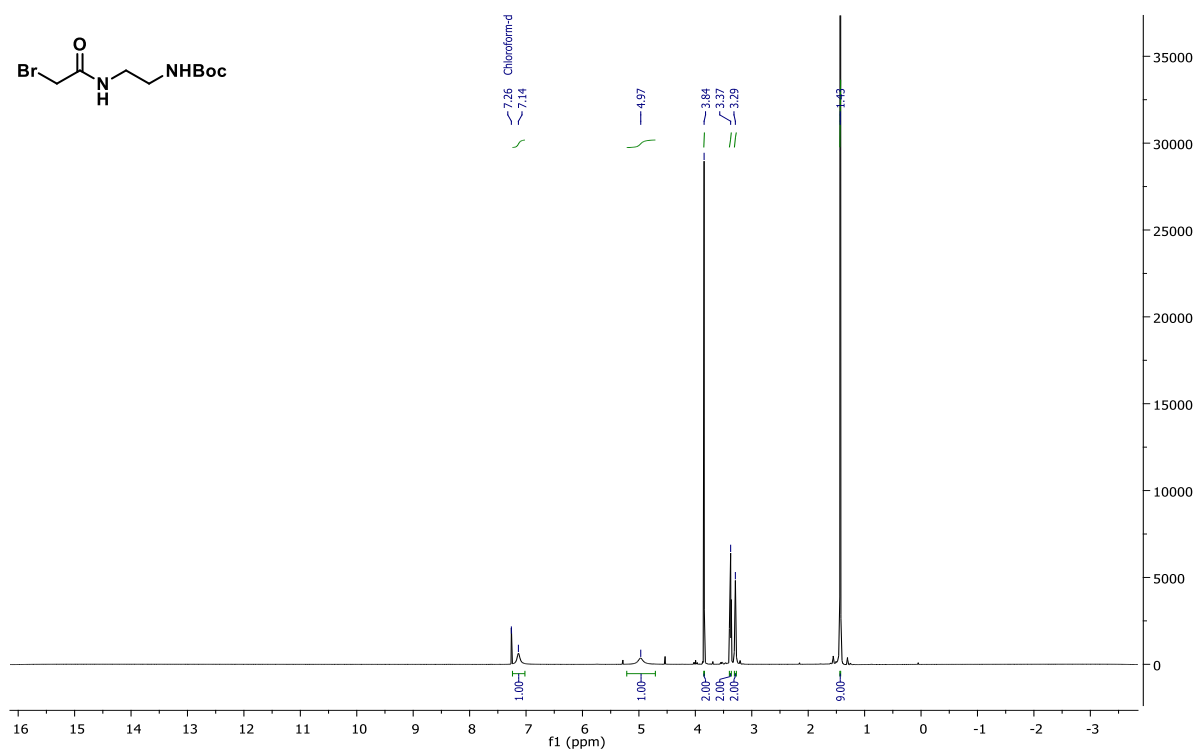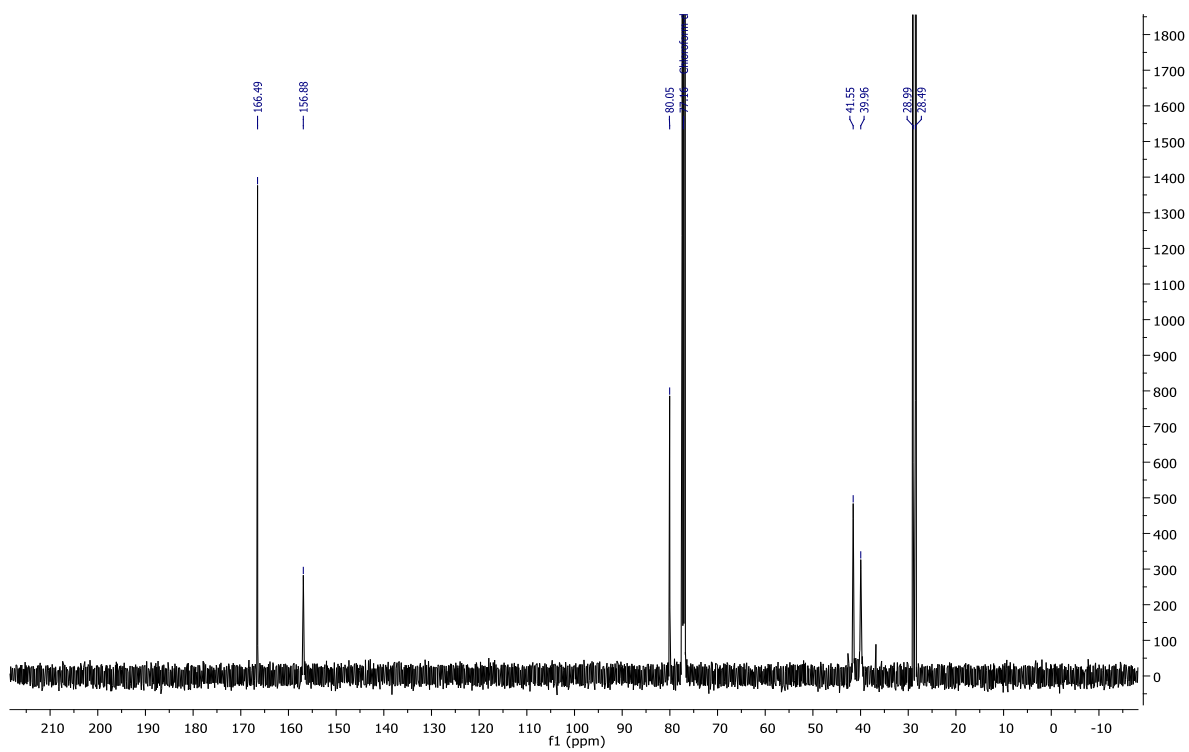



# Compound 38

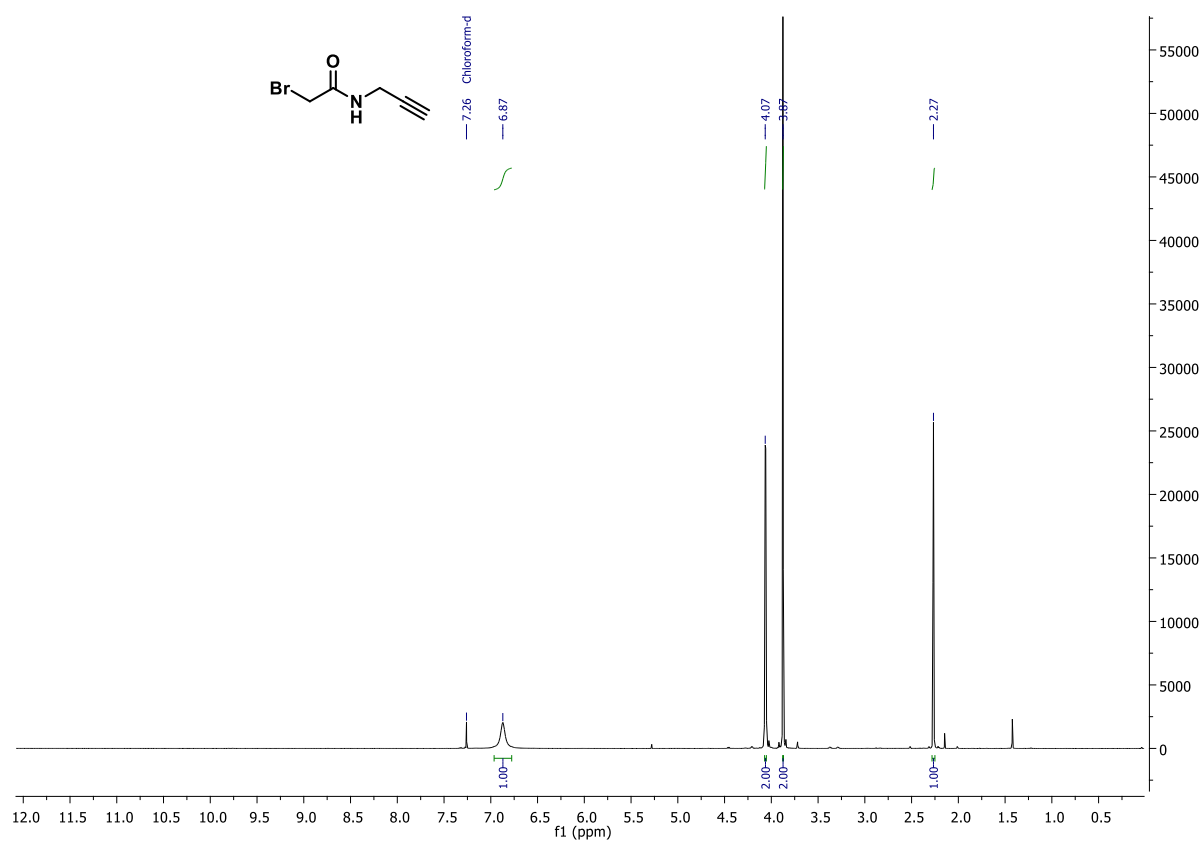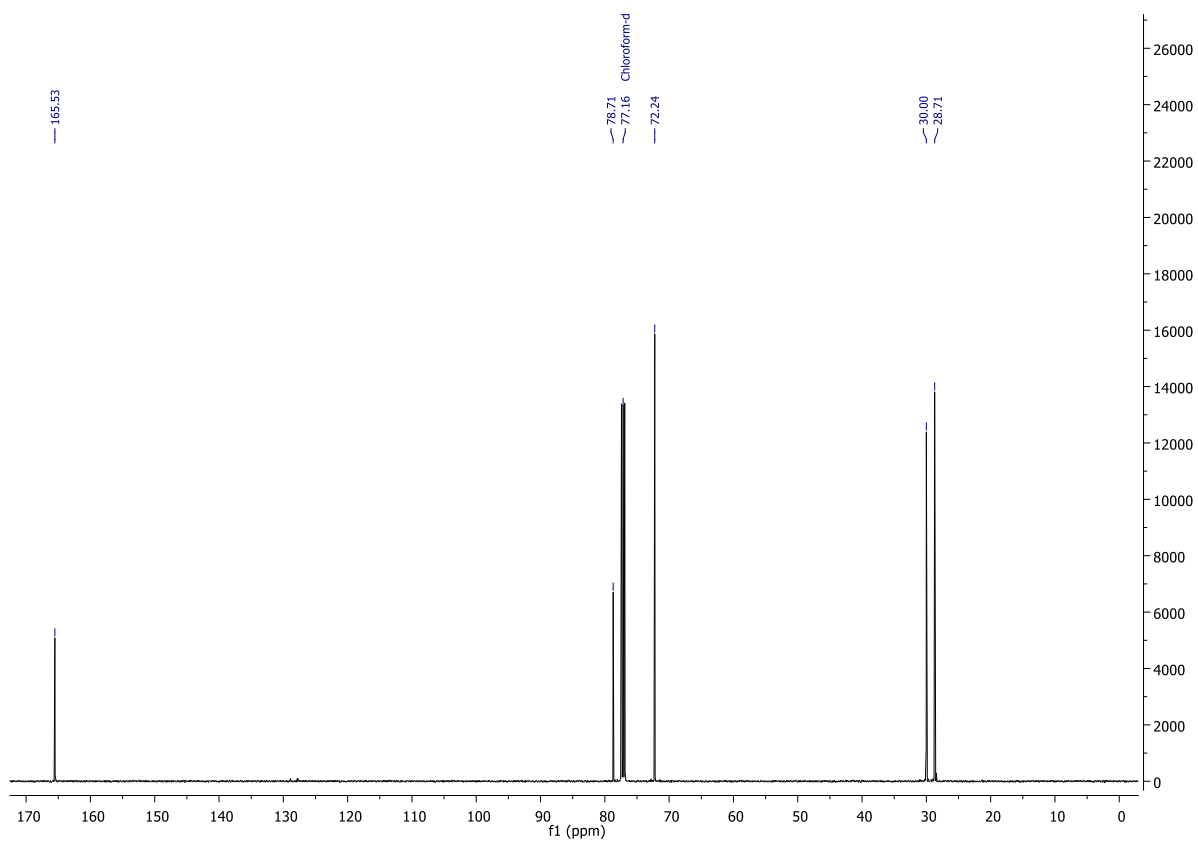

# Compound 40

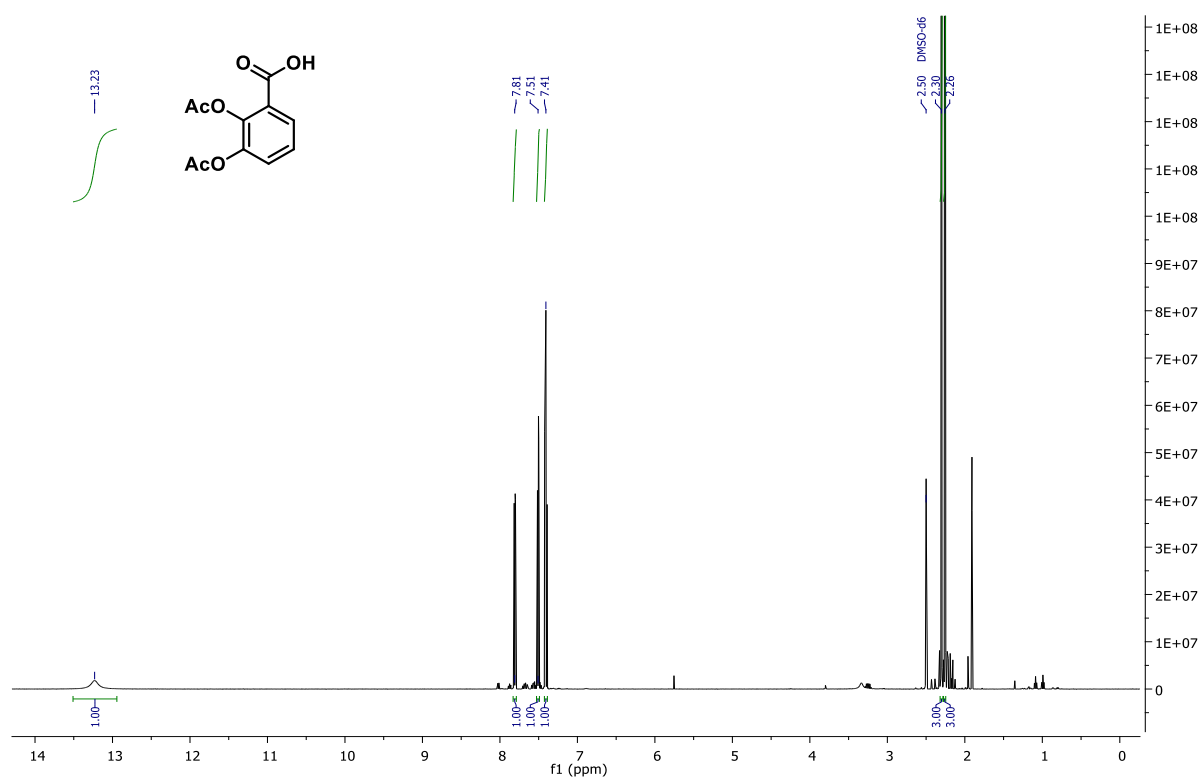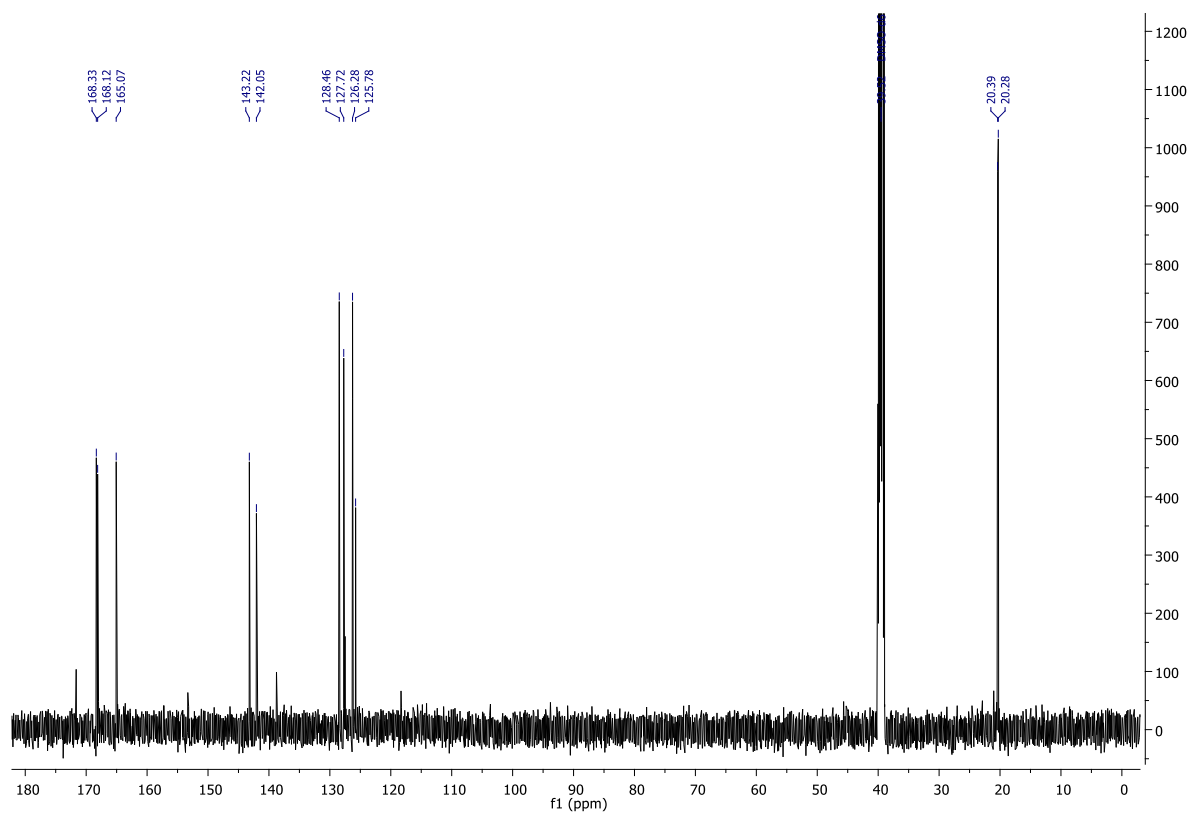





# Compound 45

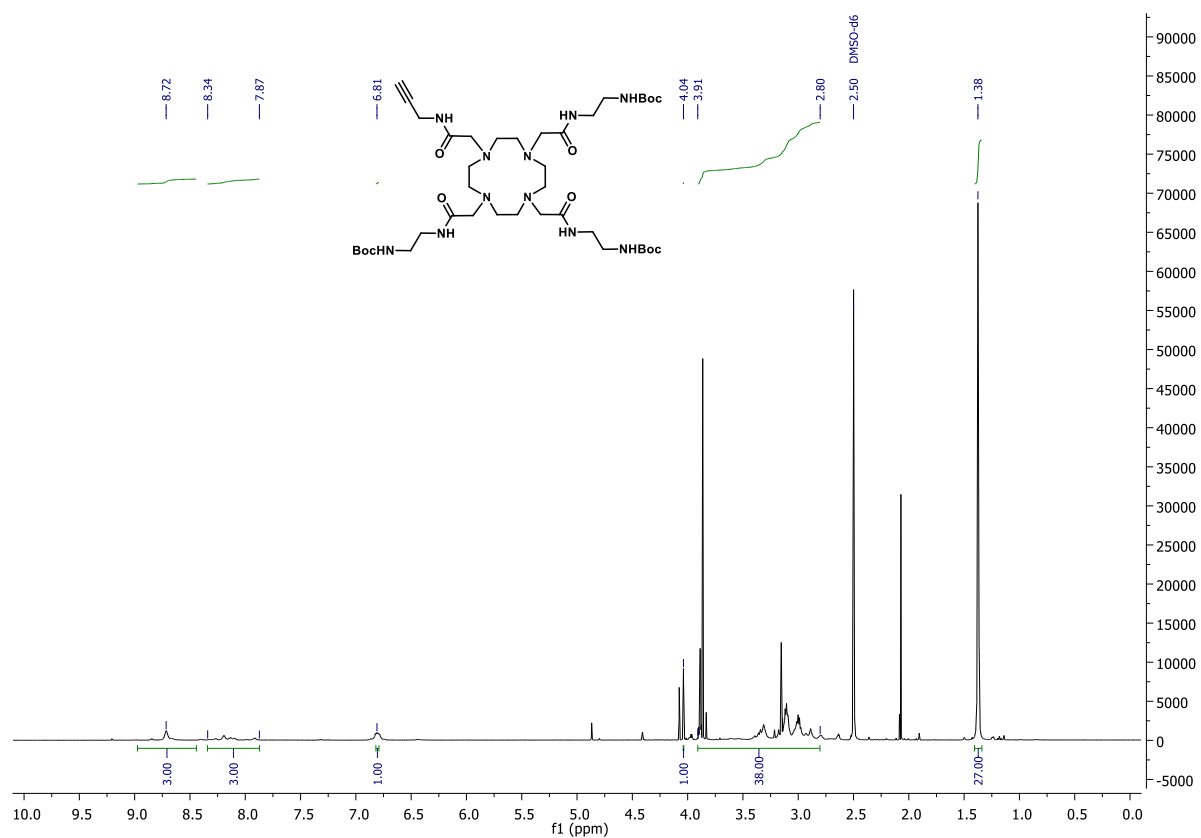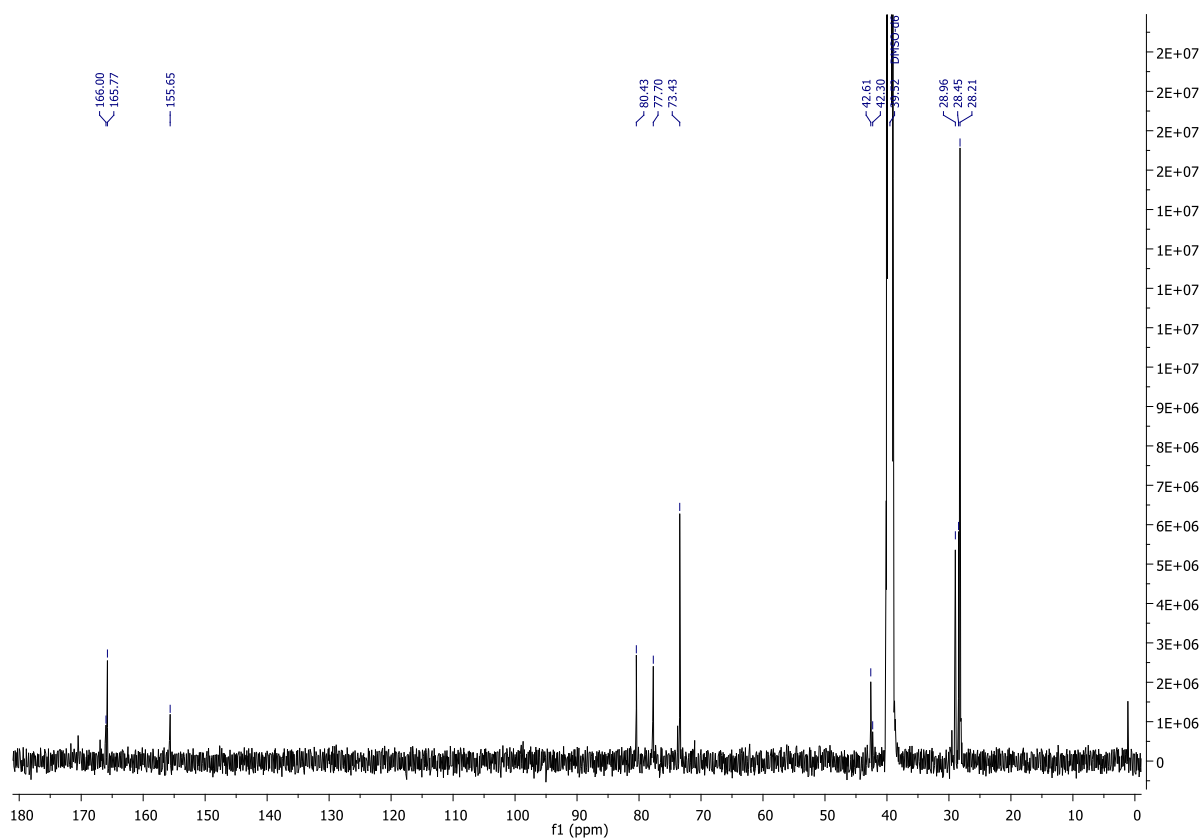

# Compound 48

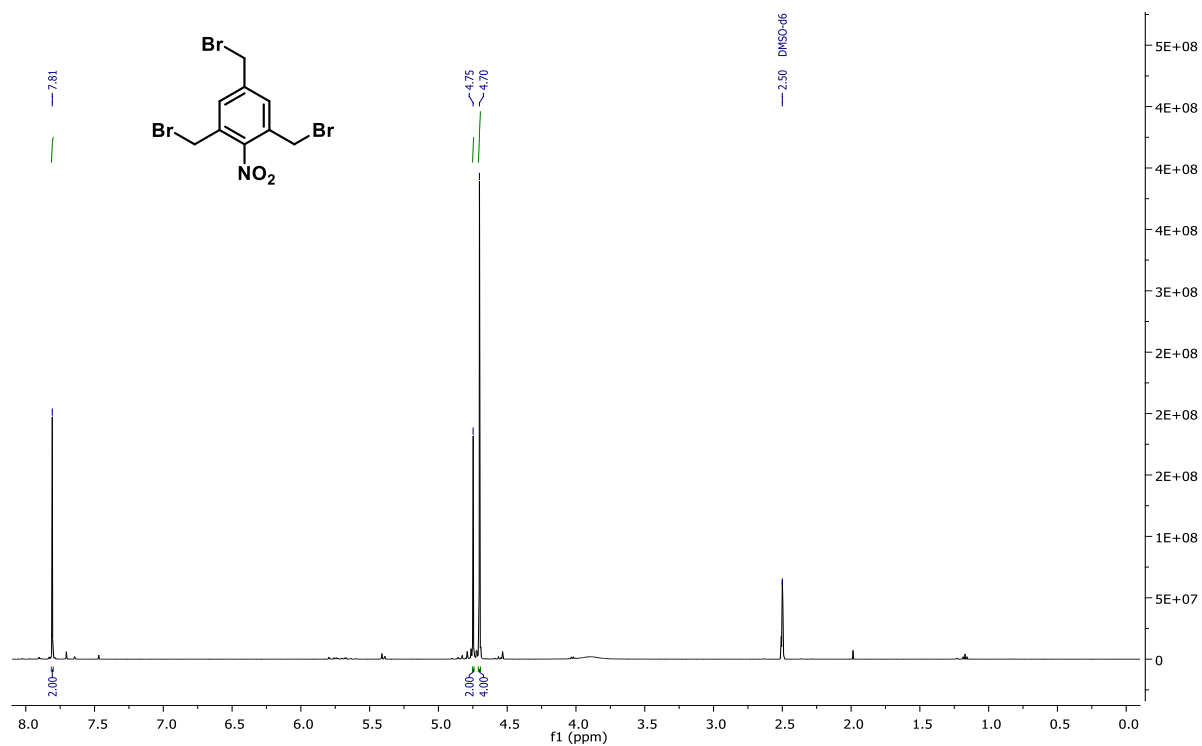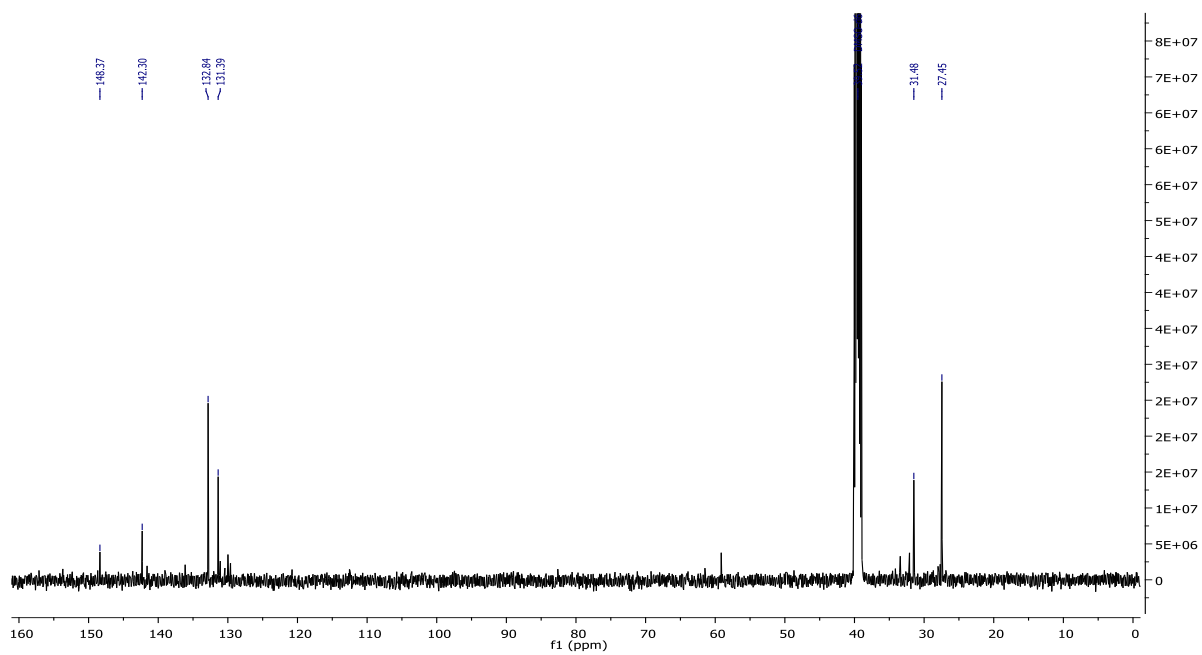

Compound 49

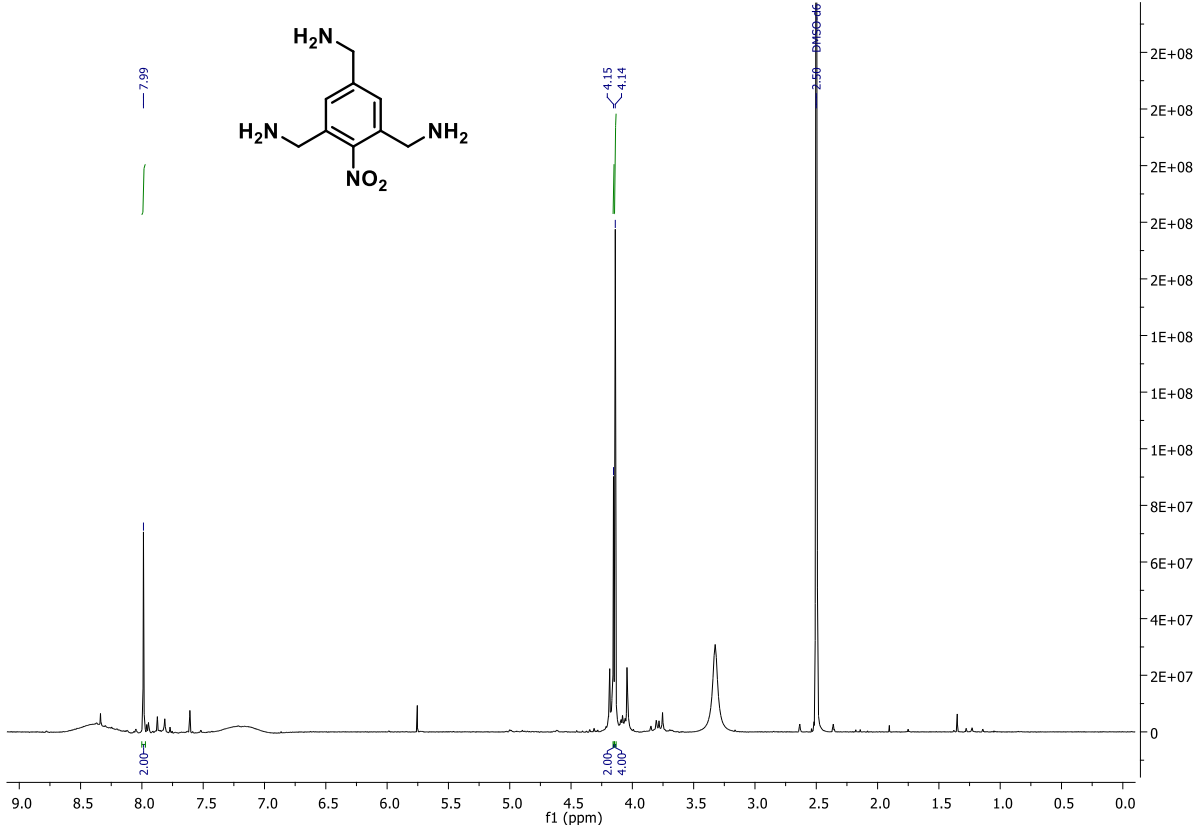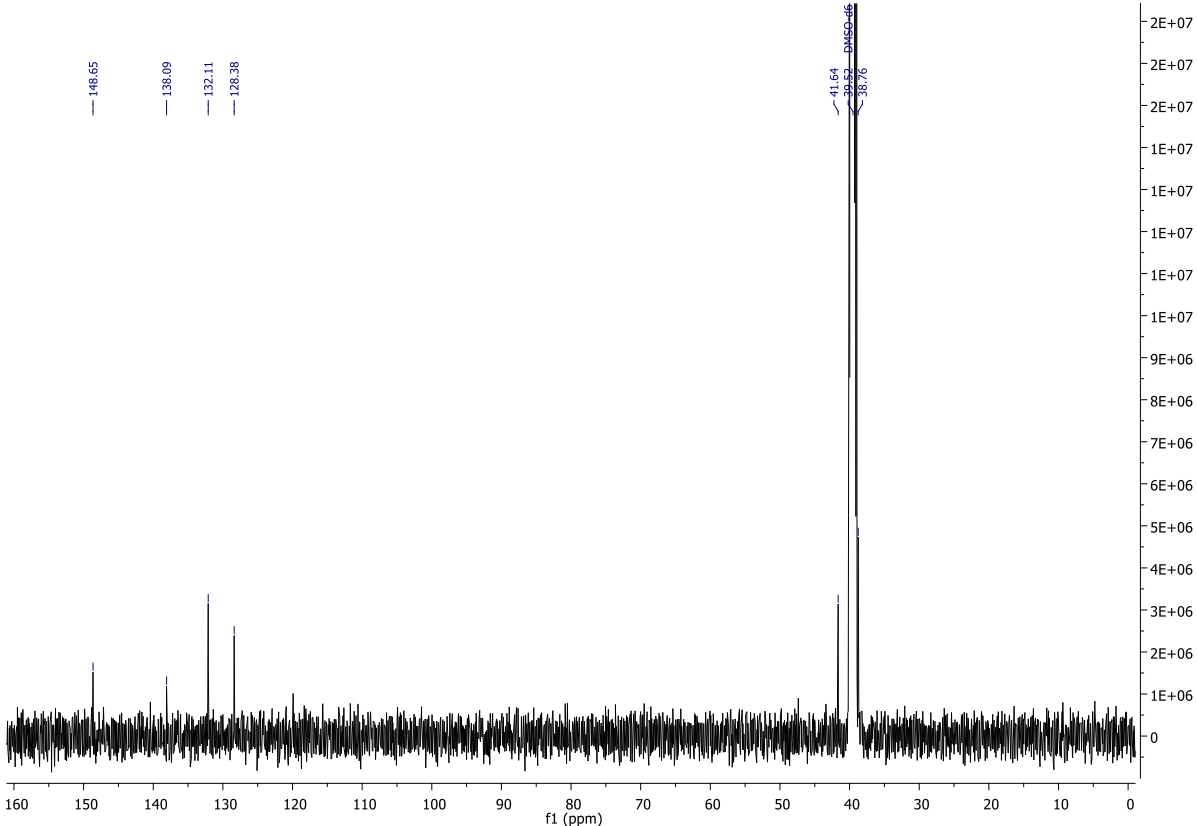

# Compound 50

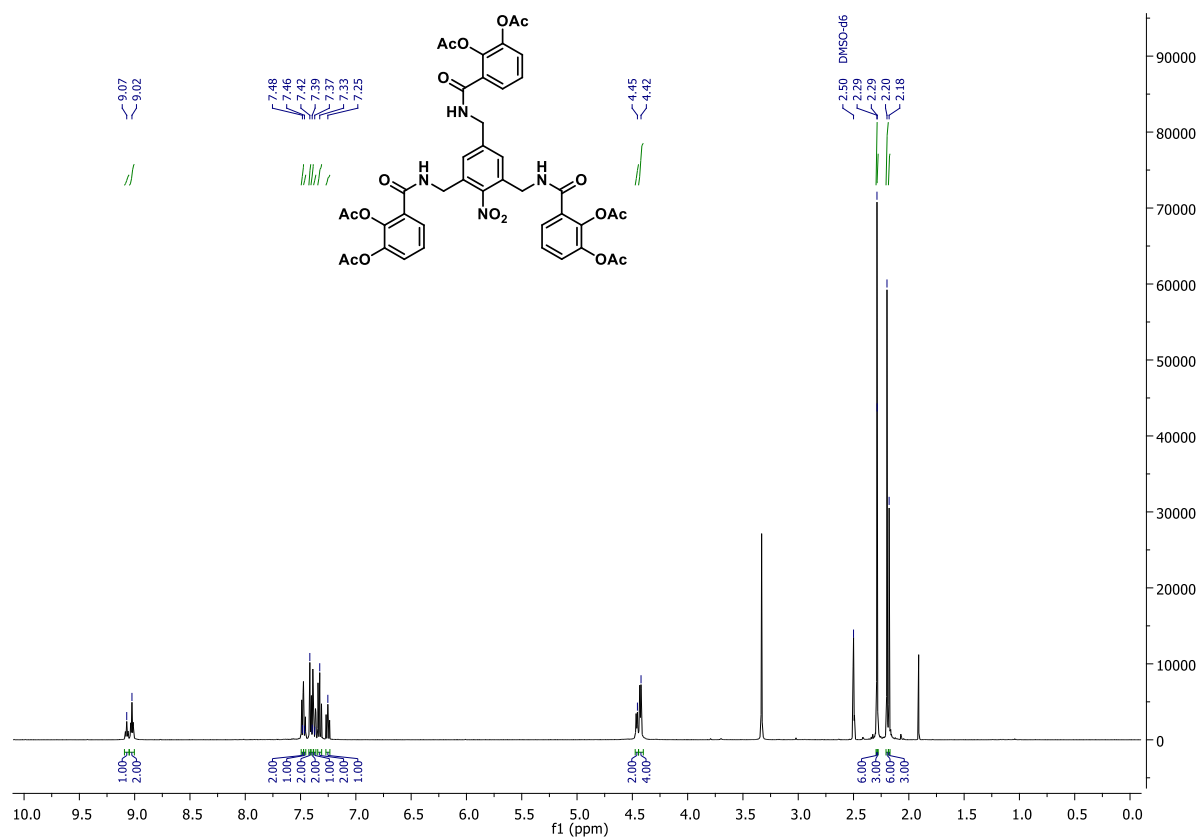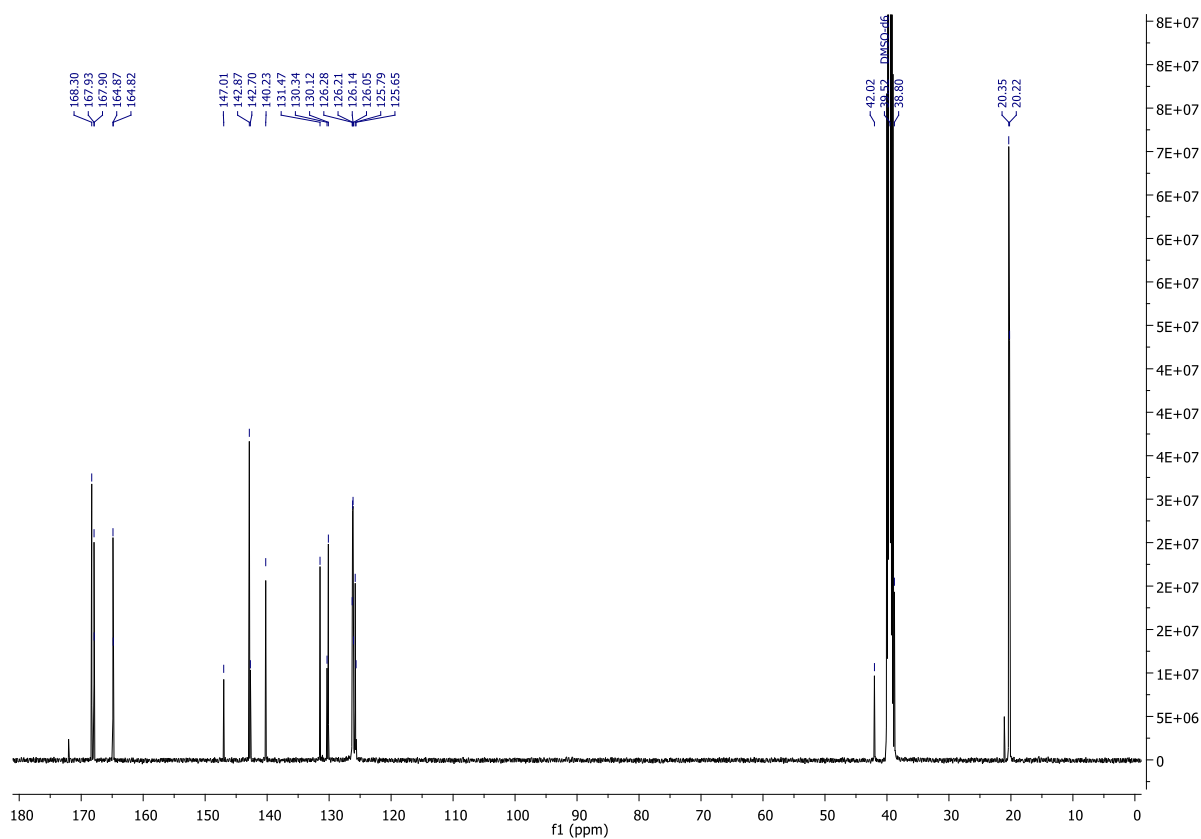



# Compound 51

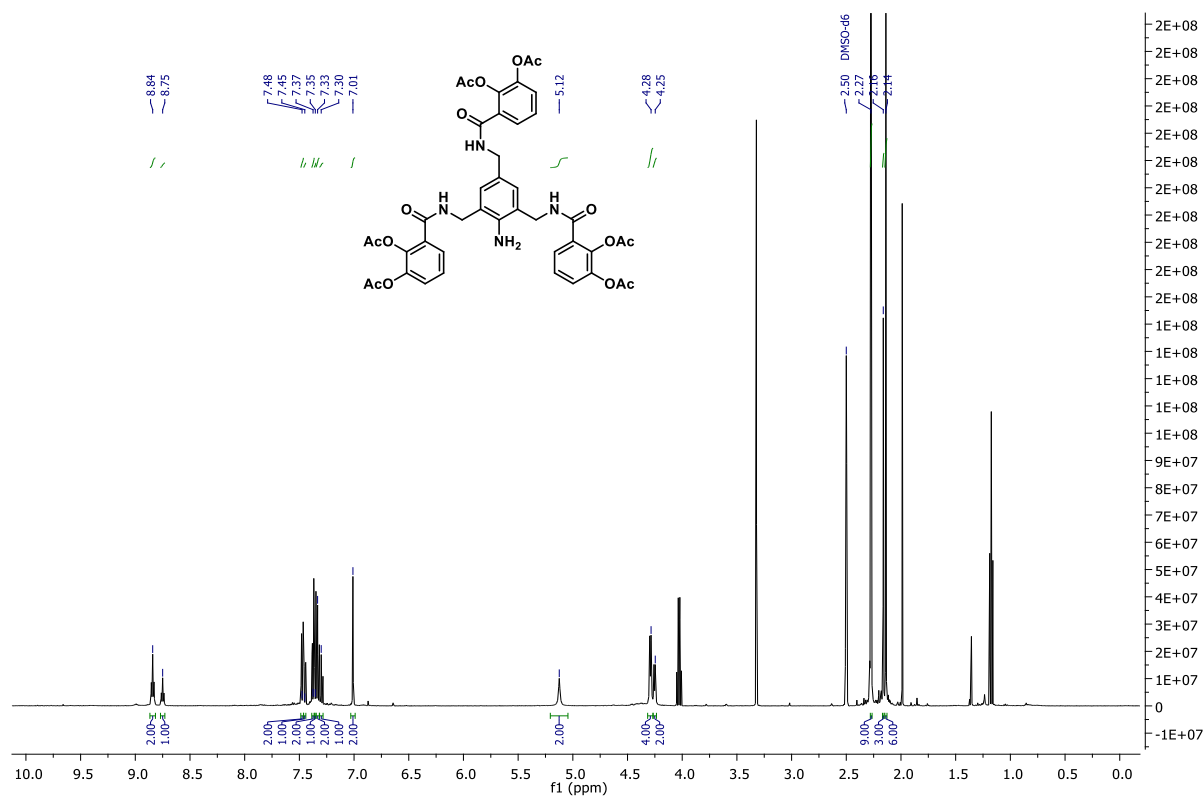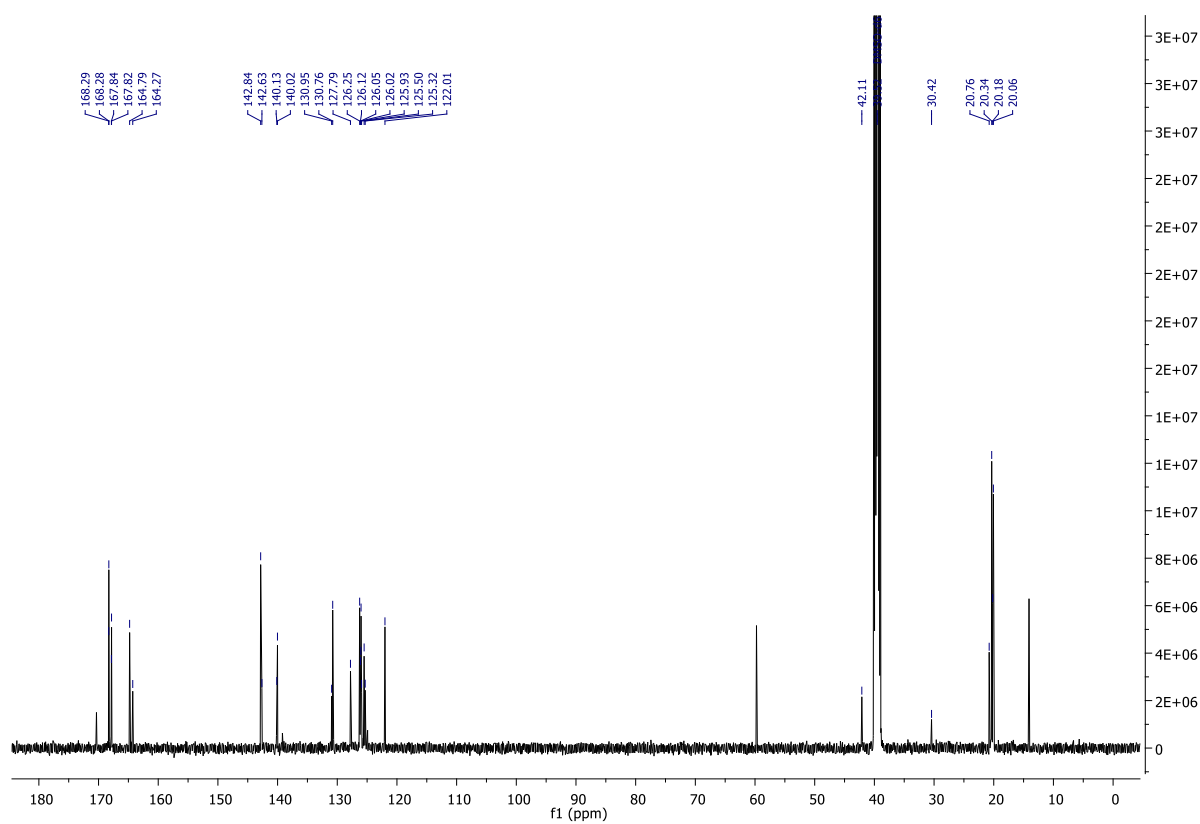

# Compound 52a

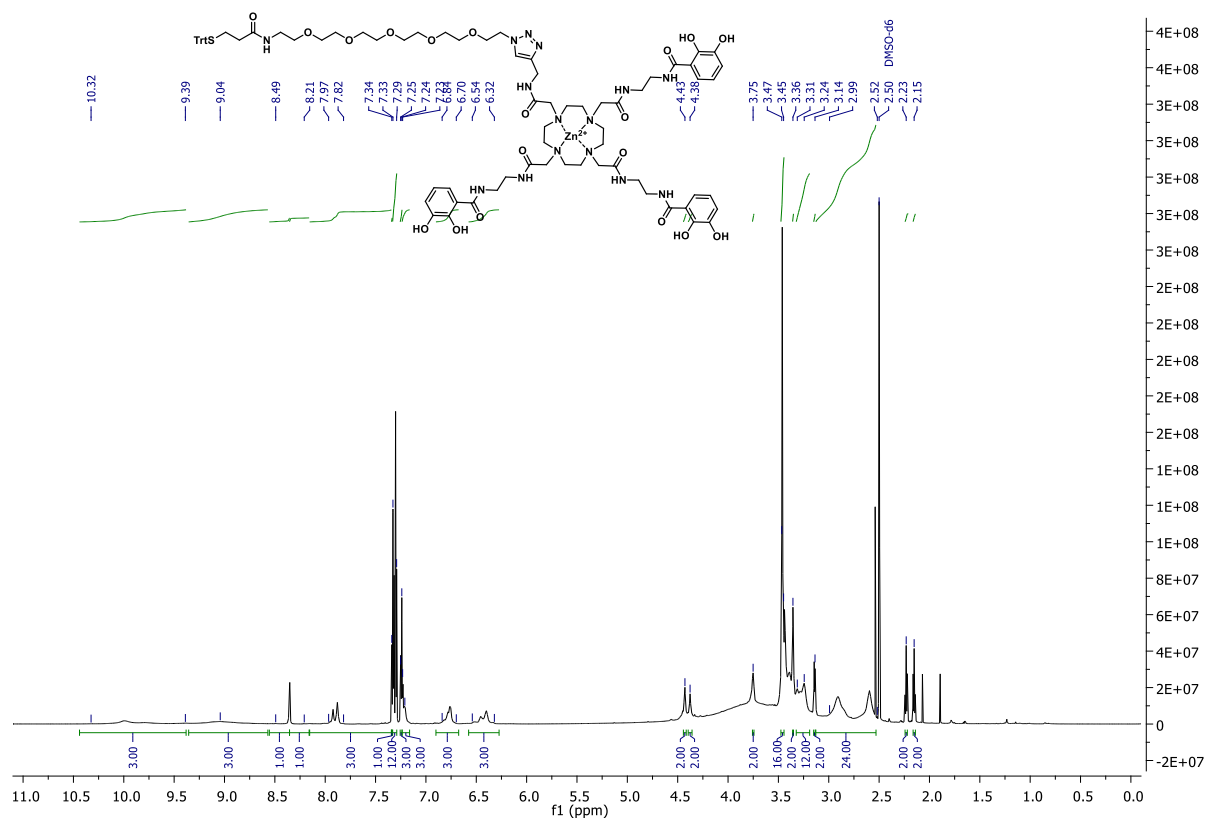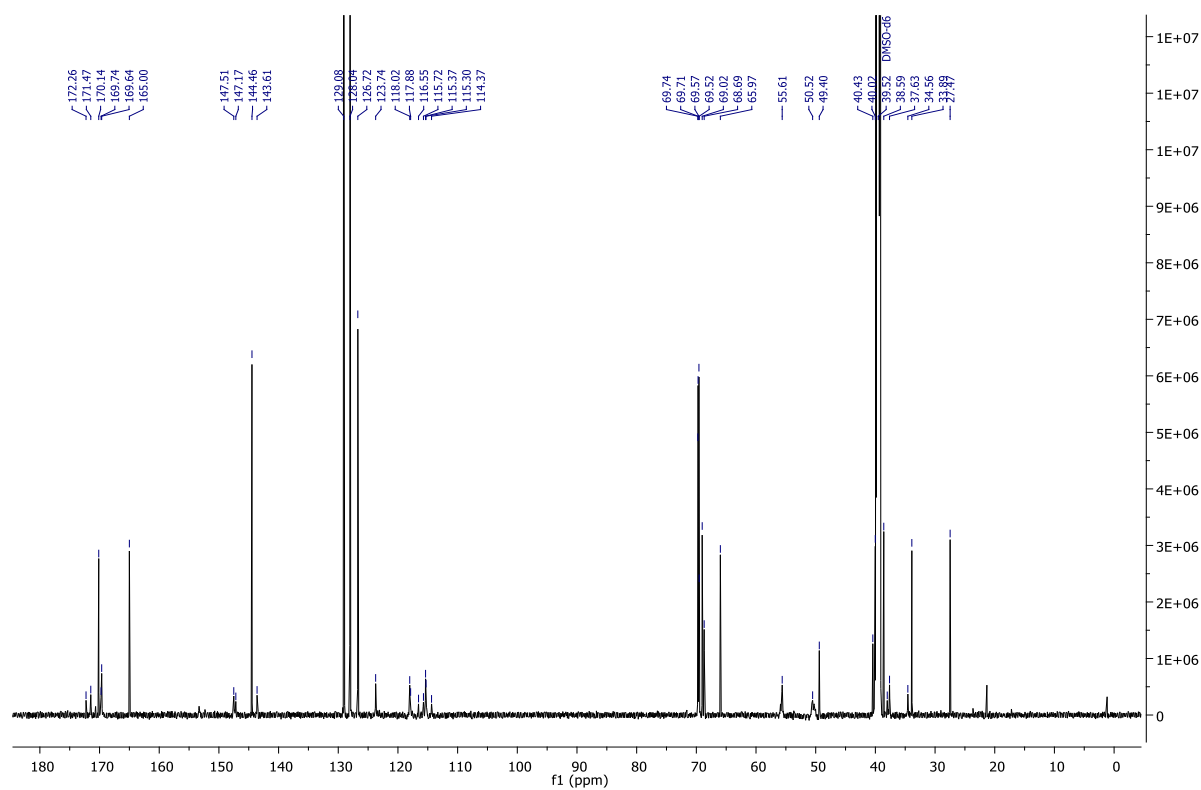

# Compound 52

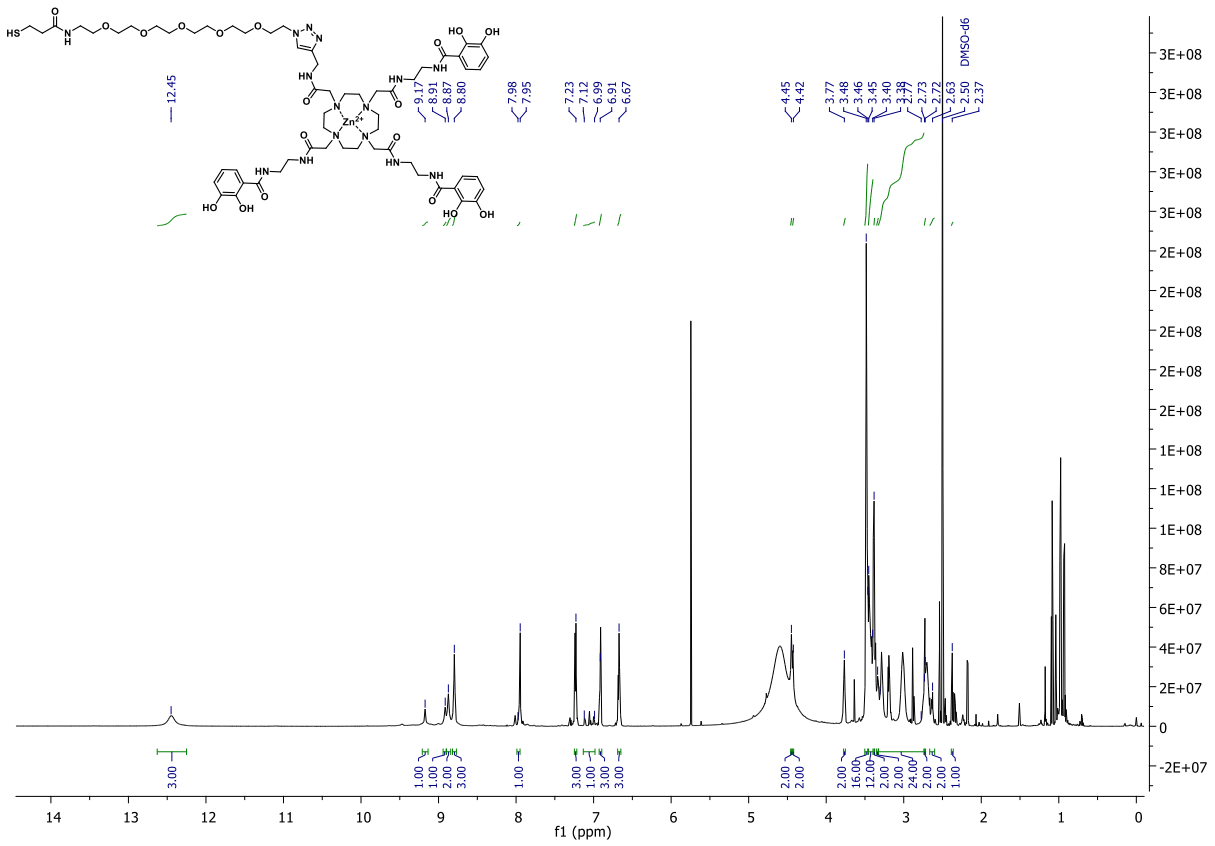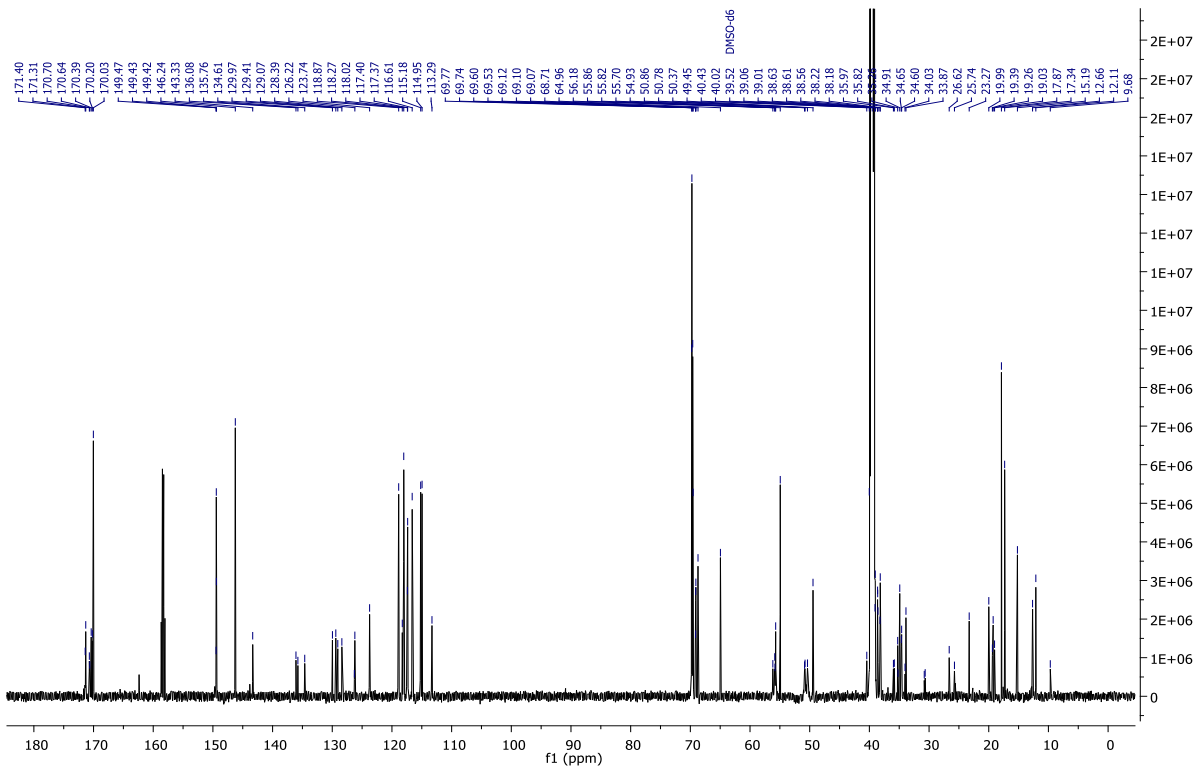

# Compound 53a

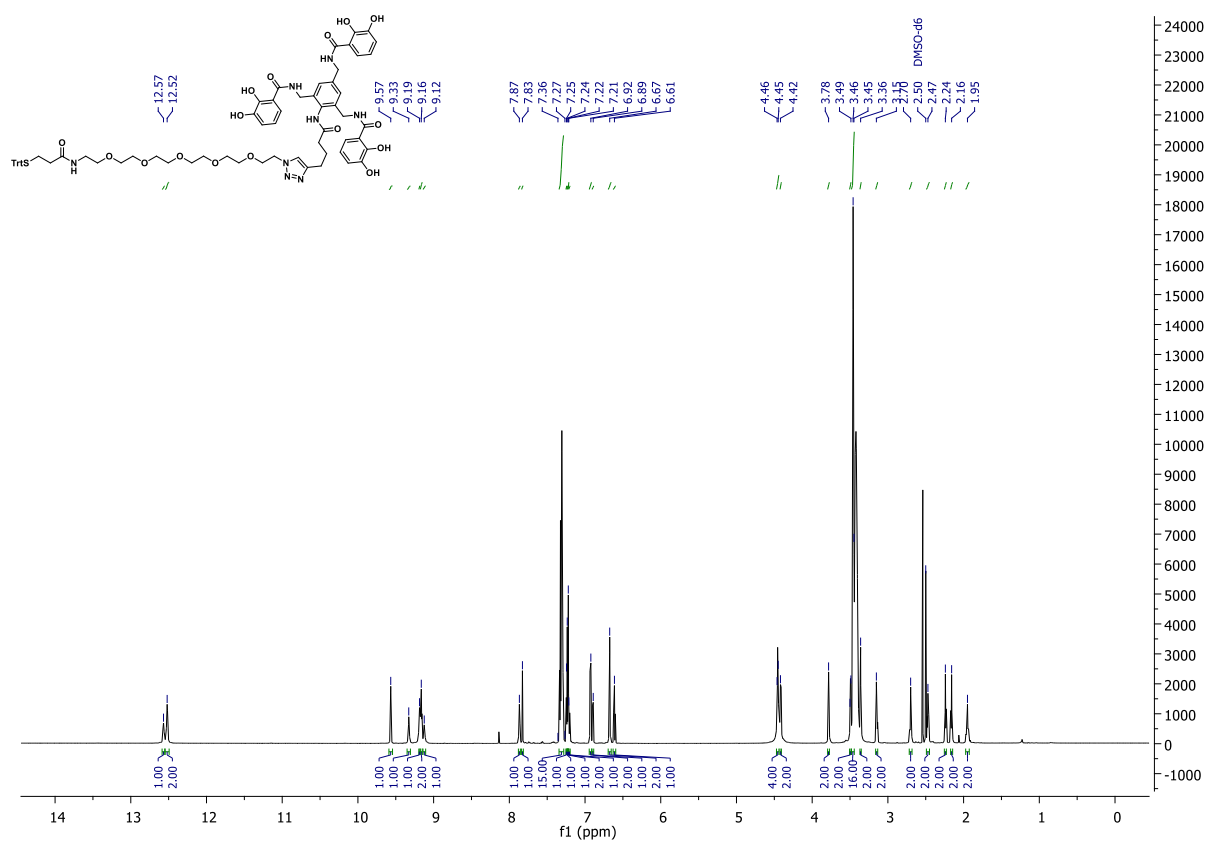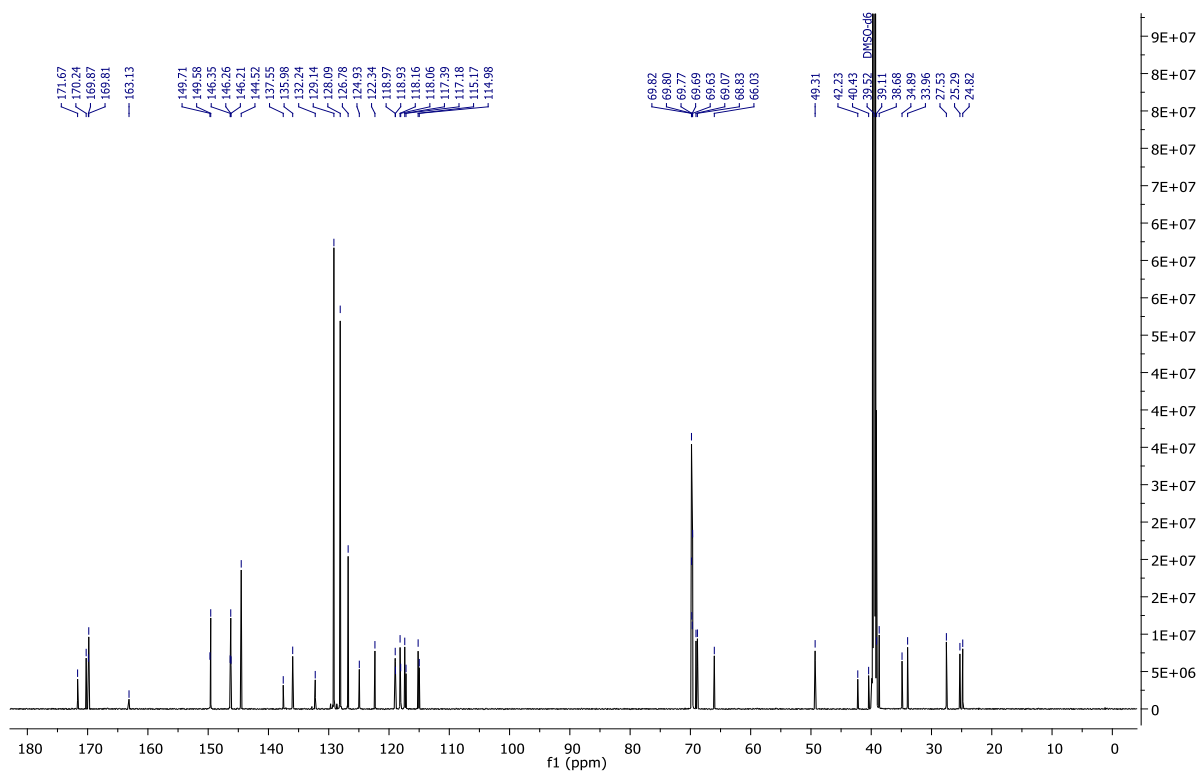

# Compound 53

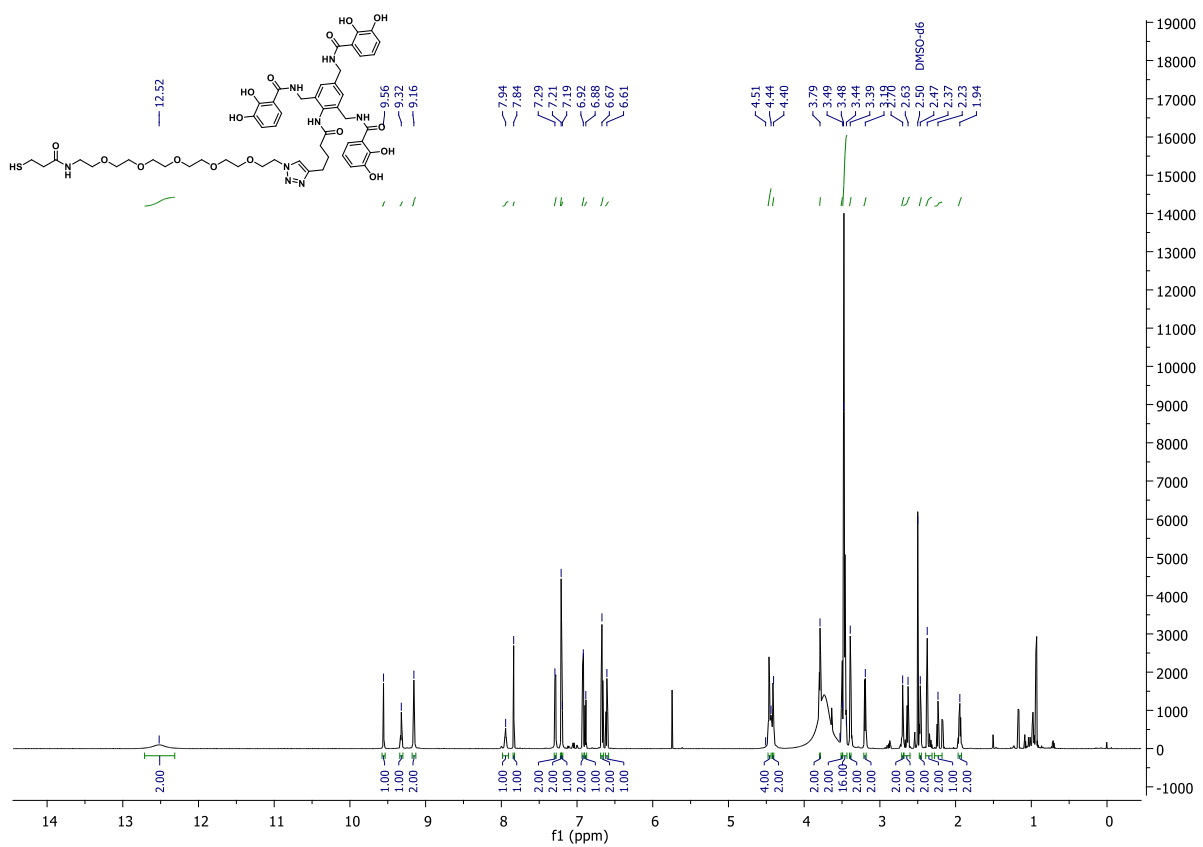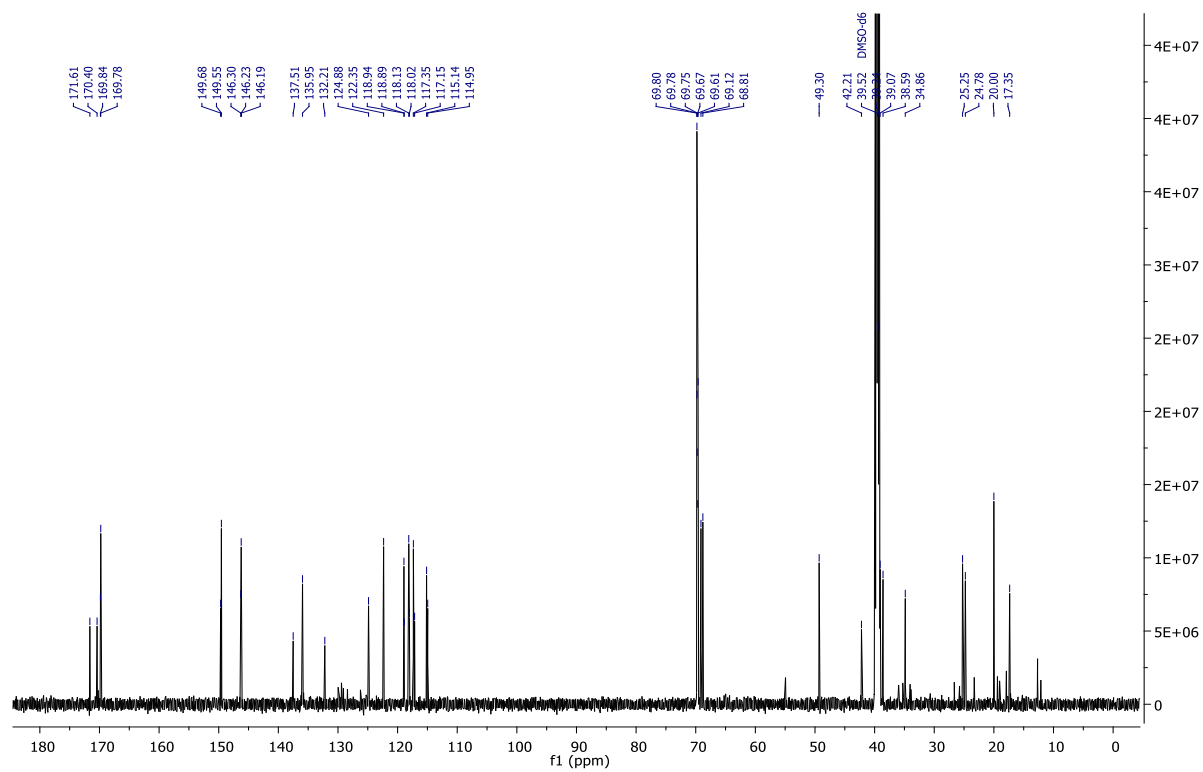

# Compound 61 (*FpvA* 121-139 N-term Carbonyl-(PEG)<sub>7</sub>-azide peptide)

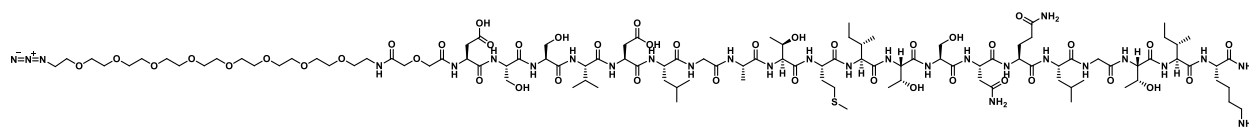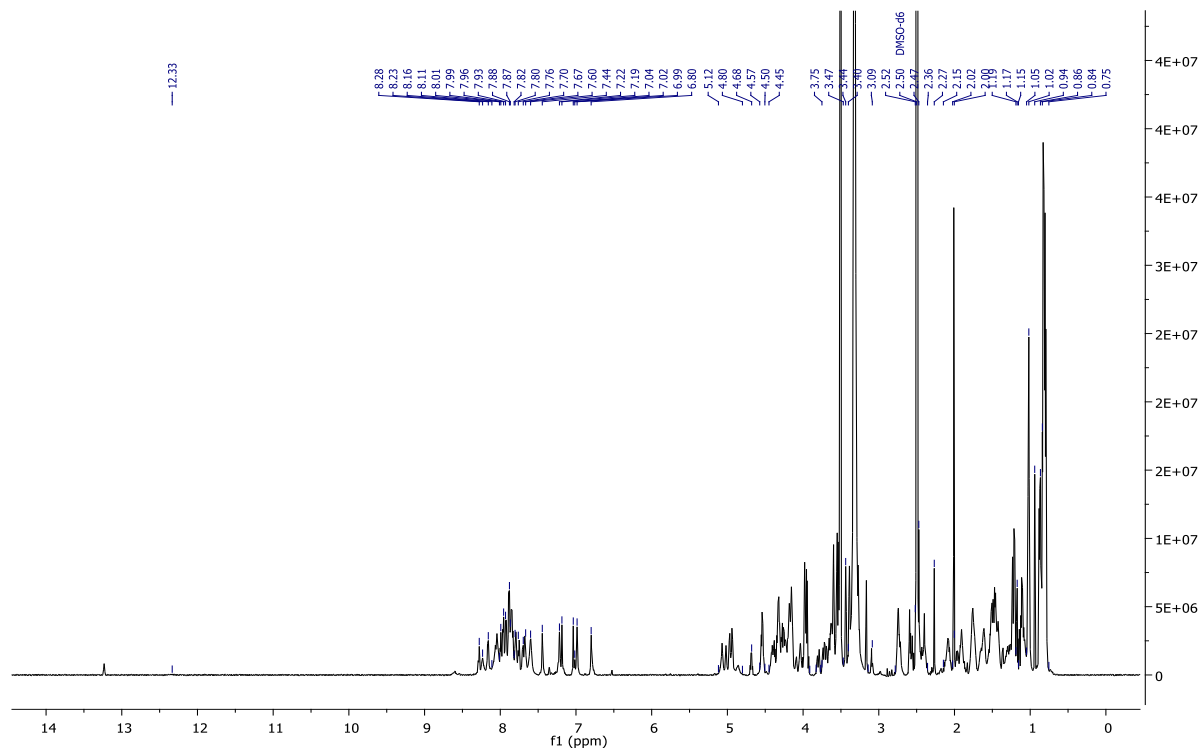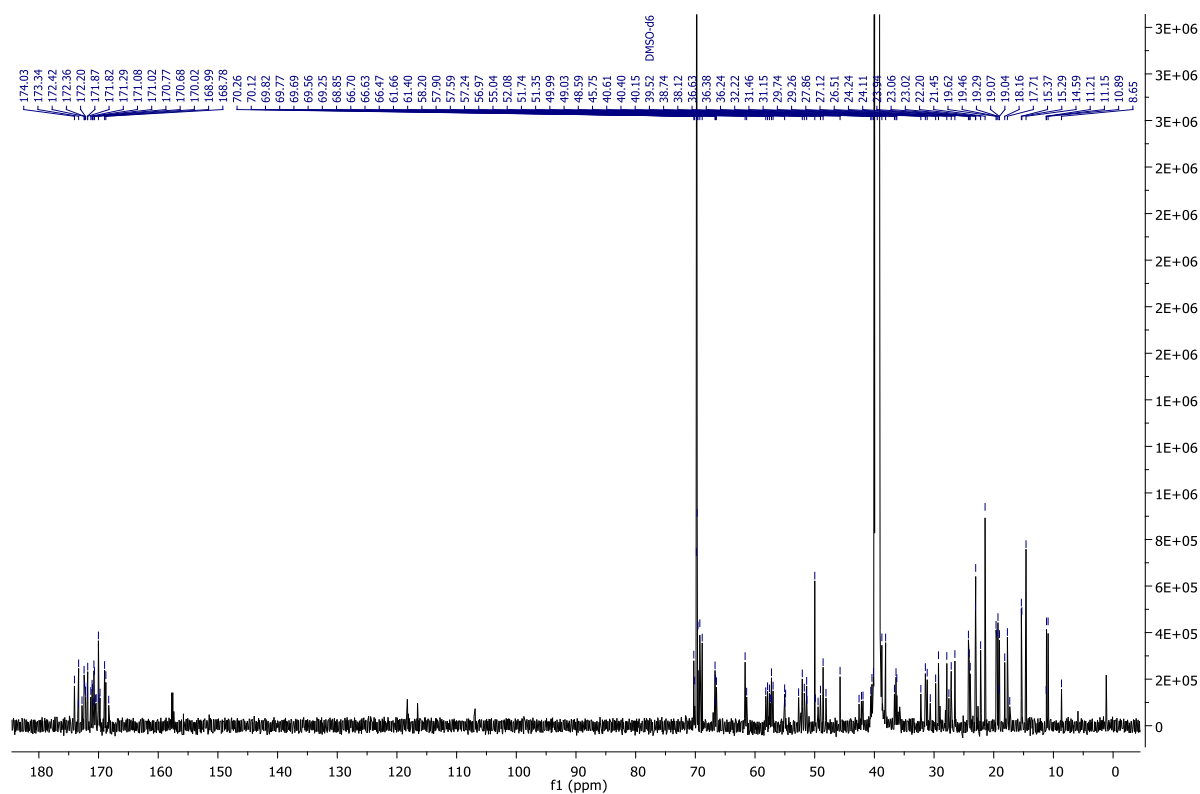

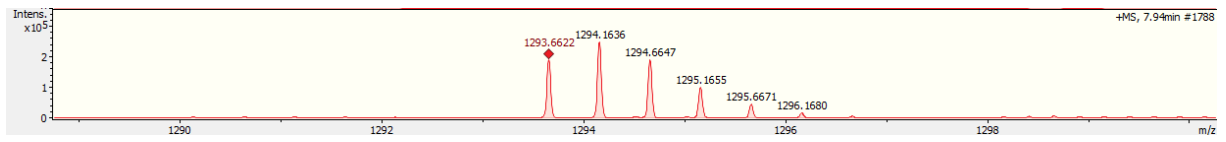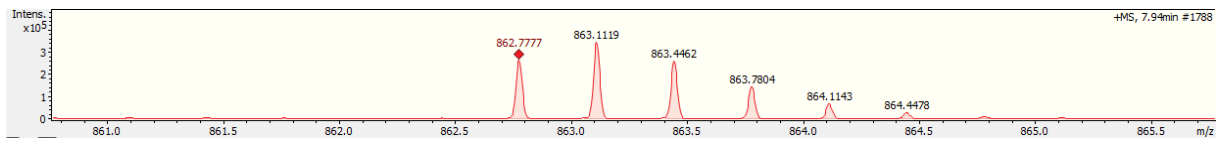

# Compound 62 (*PfeA* 33-51 *N*-term Carbonyl-(PEG)<sub>7</sub>-azide peptide)

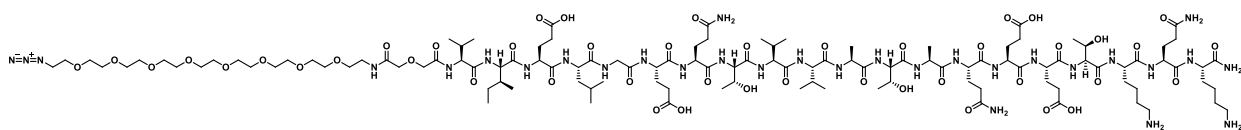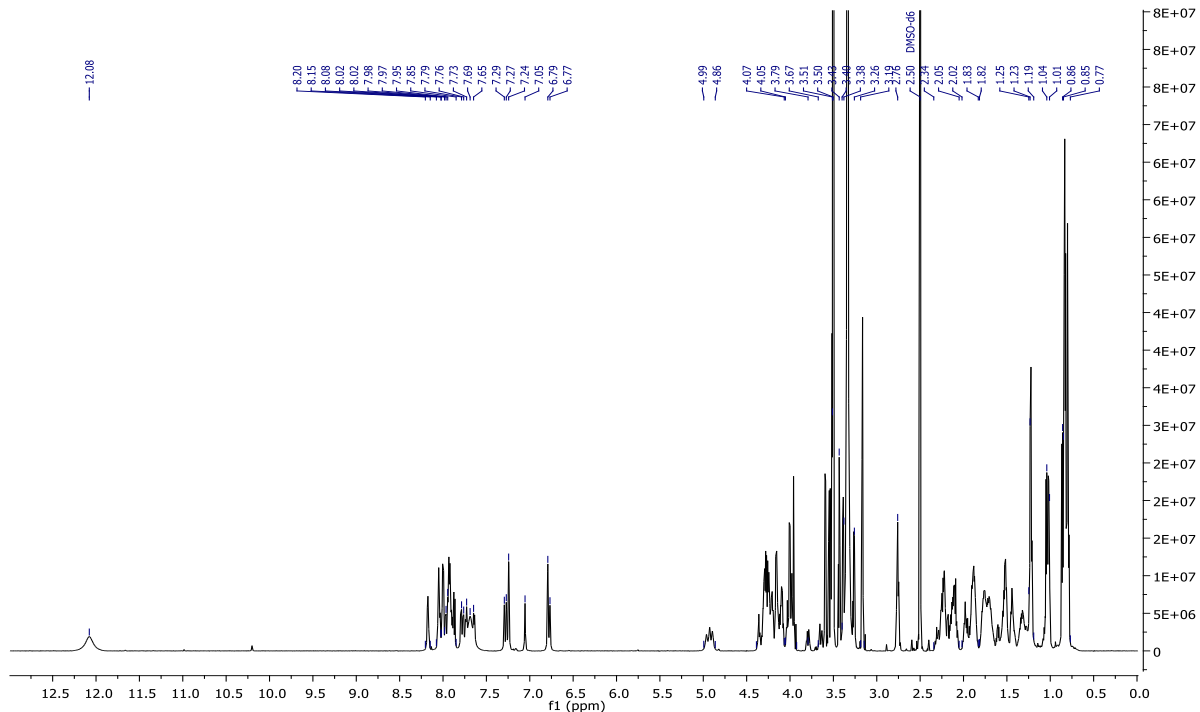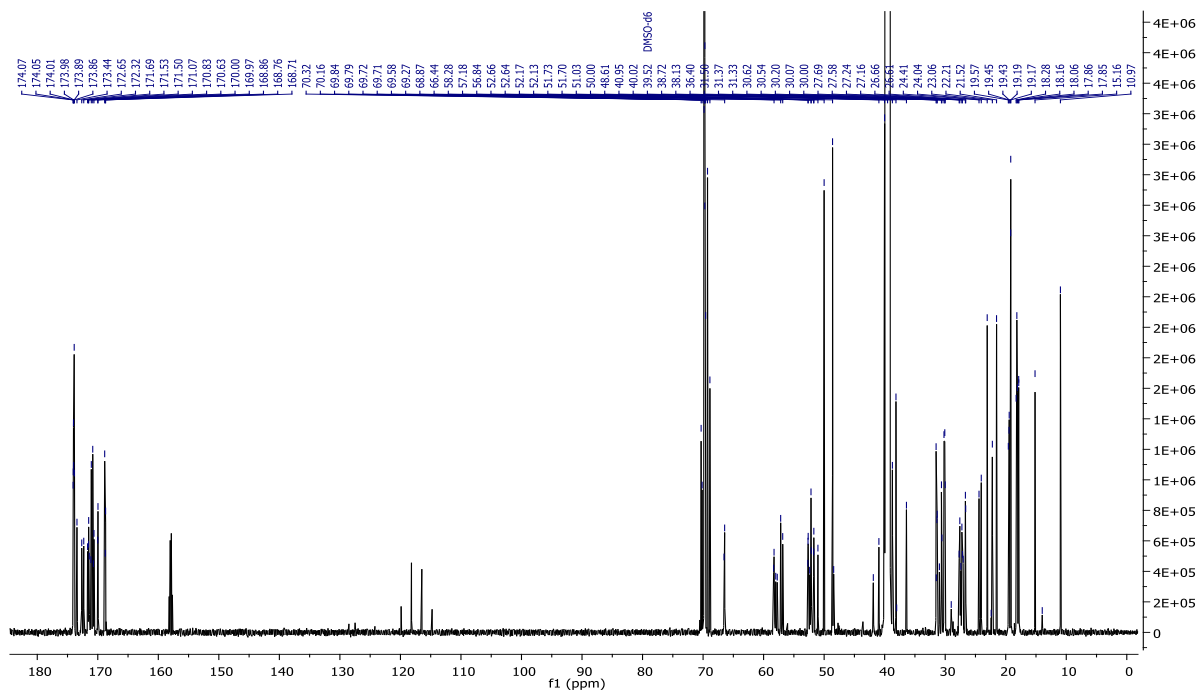



# Compound 63 (*HasR* 122-144 N-term Carbonyl-(PEG)<sub>7</sub>-azide peptide)

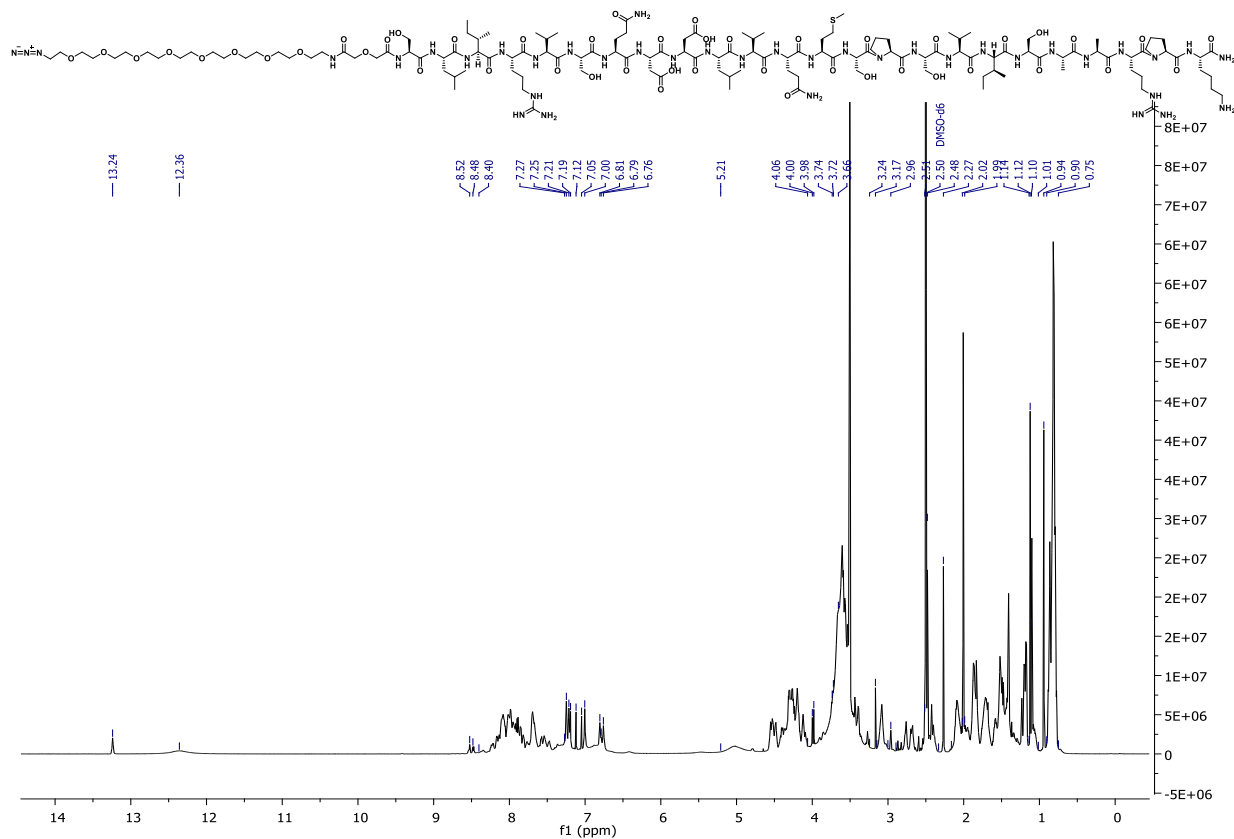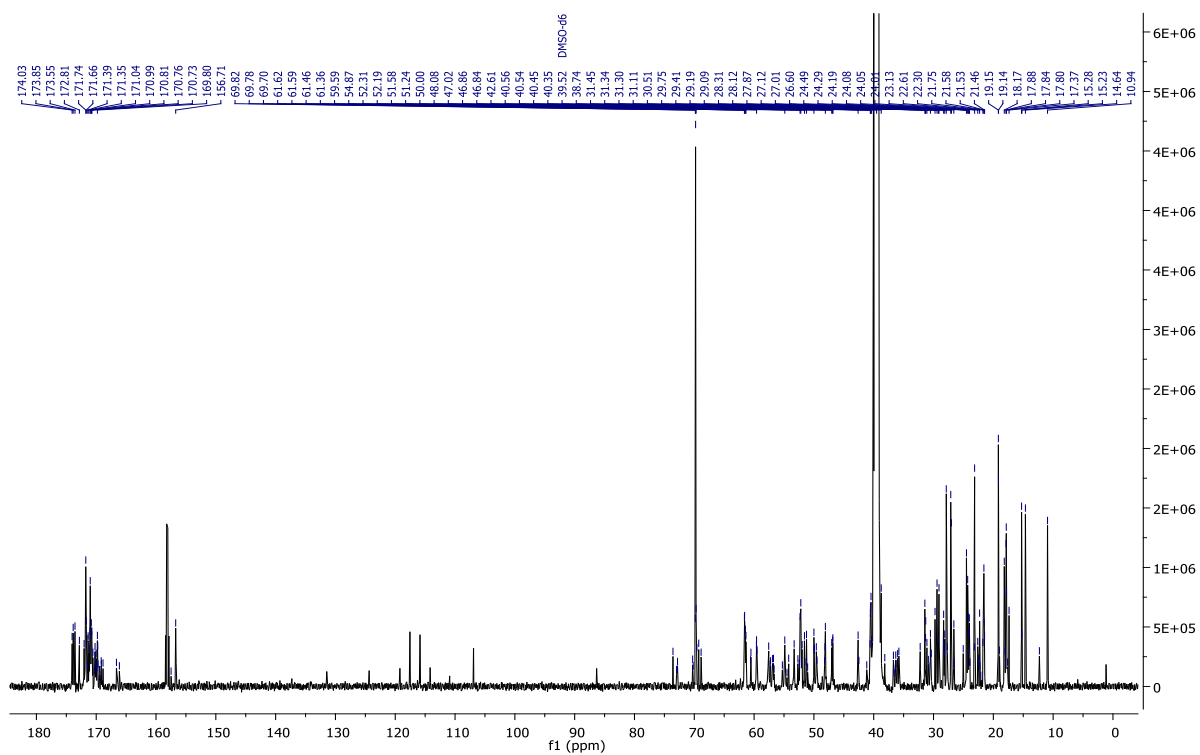

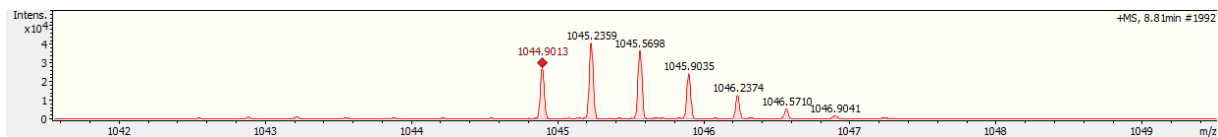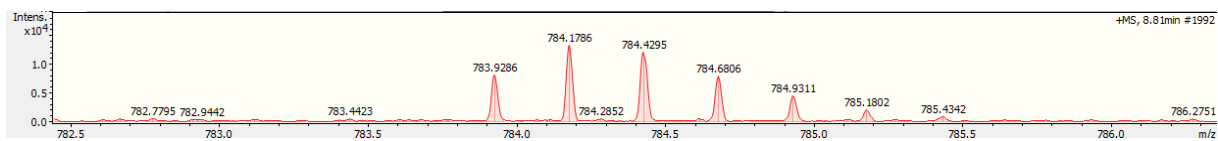

# Compound 64 (*FpvA* 121-139 C-term Carbonyl-(PEG)<sub>7</sub>-azide peptide)

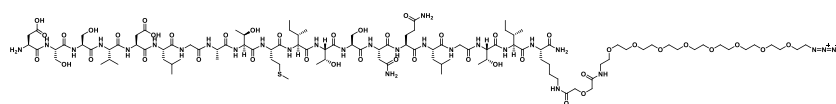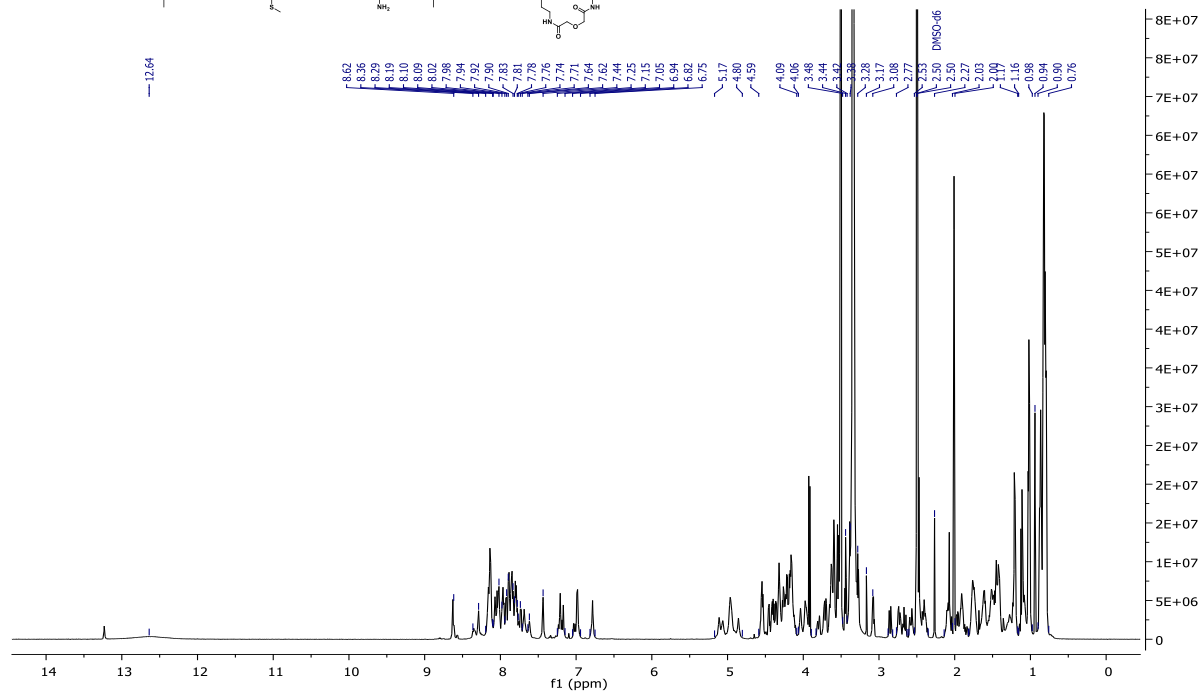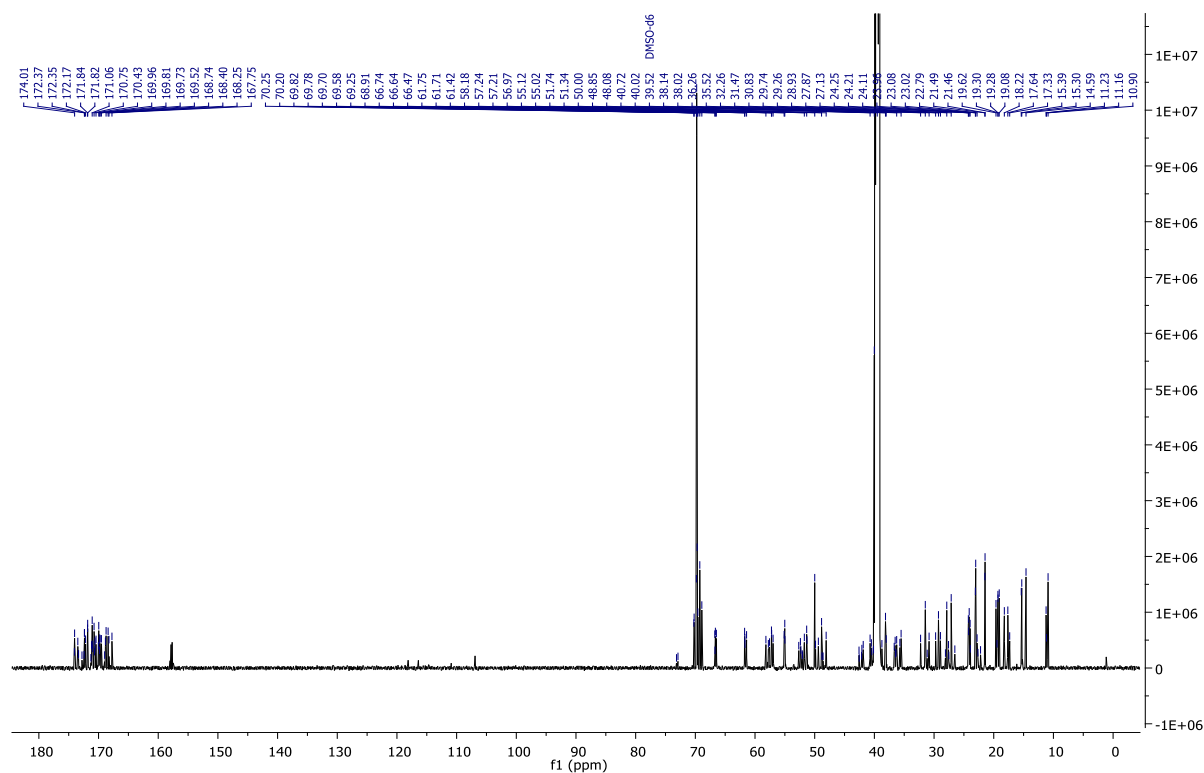

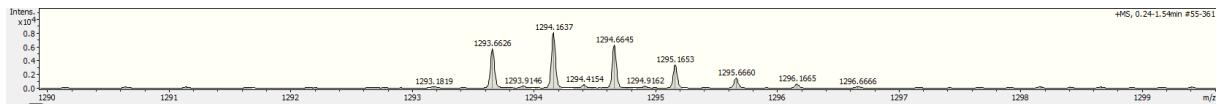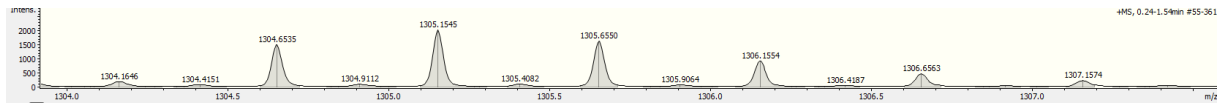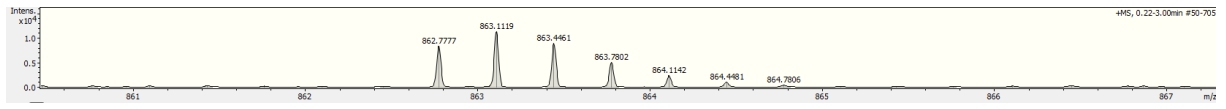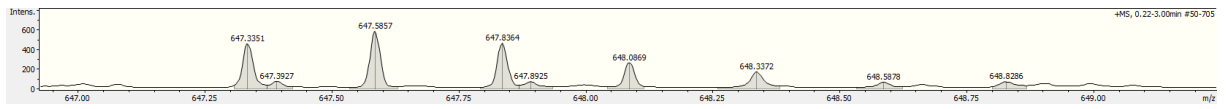

# Compound 65 (*PfeA* 33-51 C-term Carbonyl-(PEG)<sub>7</sub>-azide peptide)

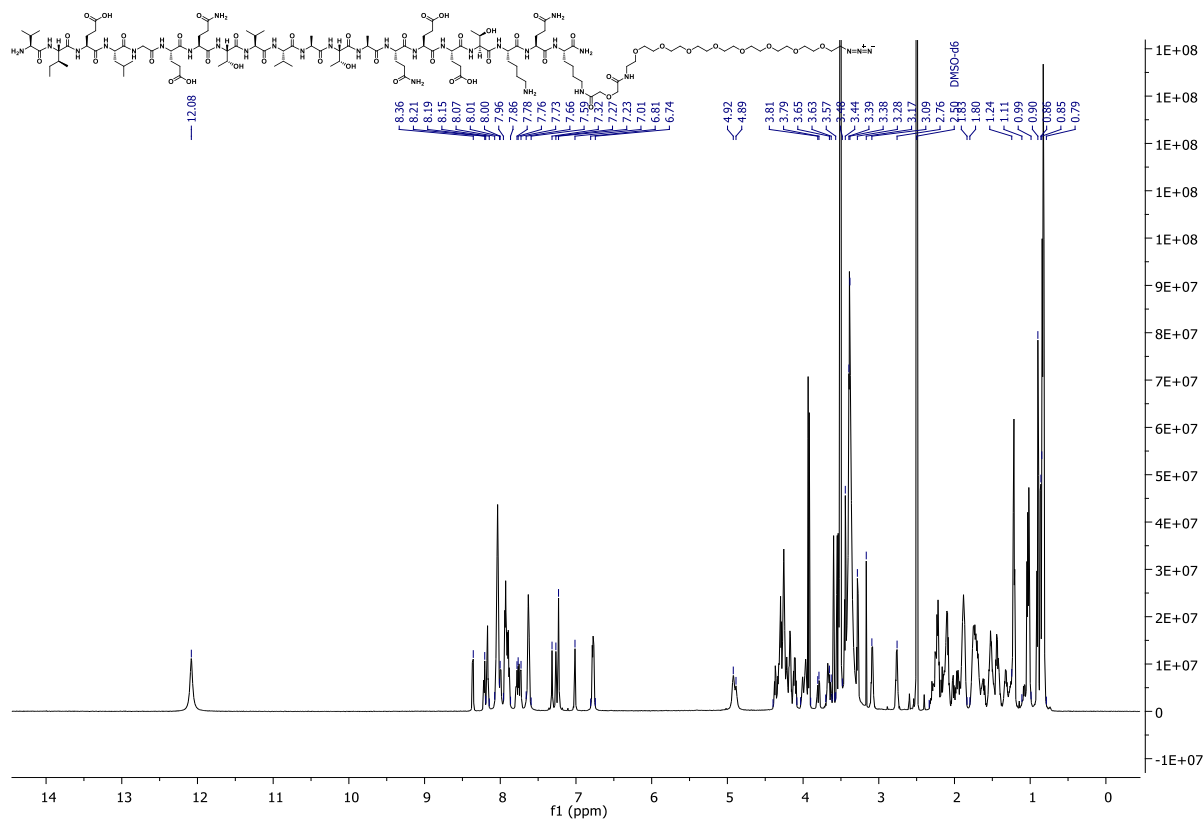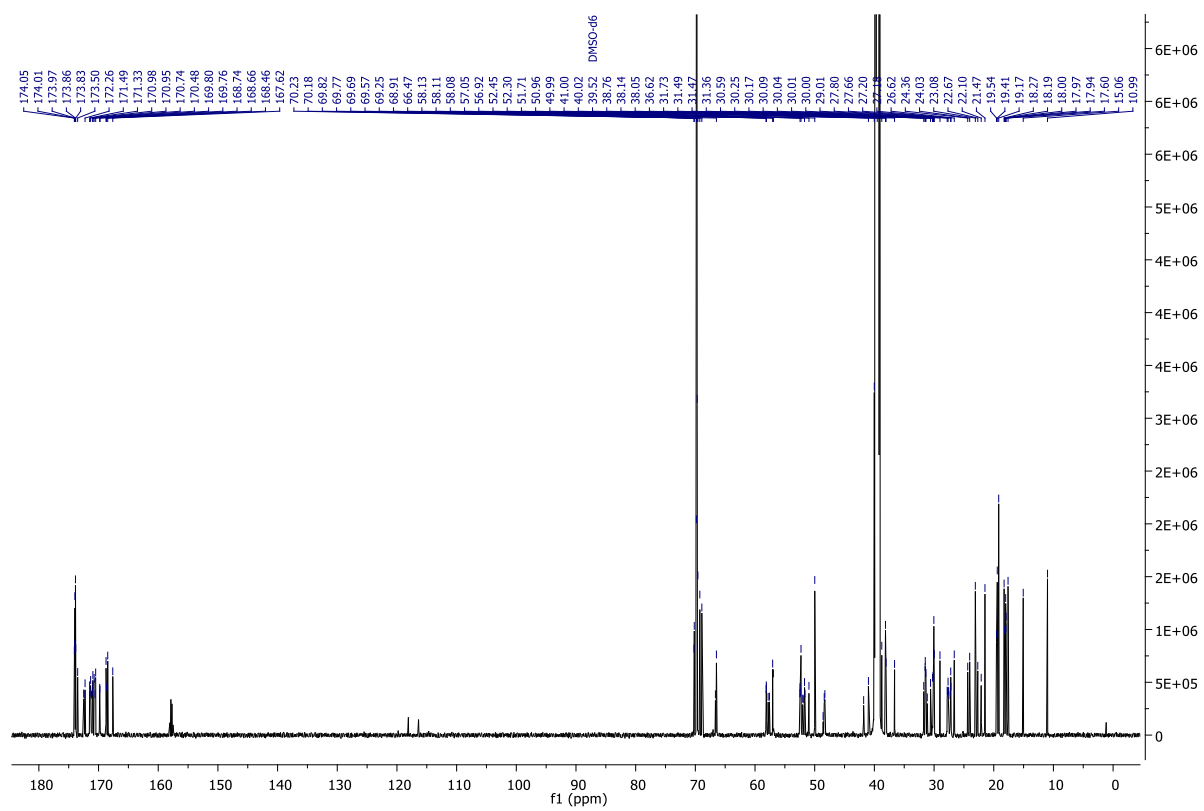

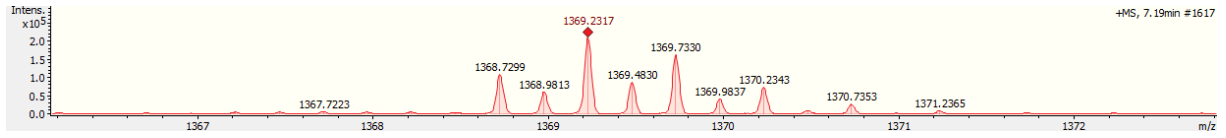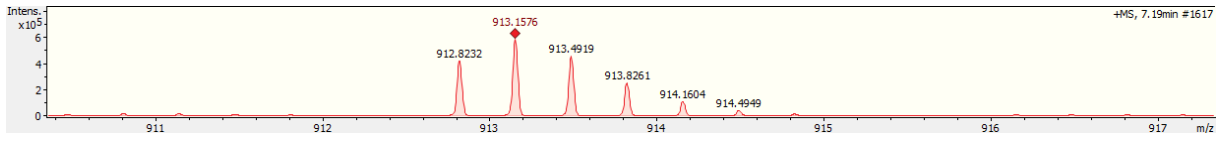

**Compound 66 (HasR 122-144 C-term Carbonyl-(PEG)<sub>7</sub>-azide peptide)**

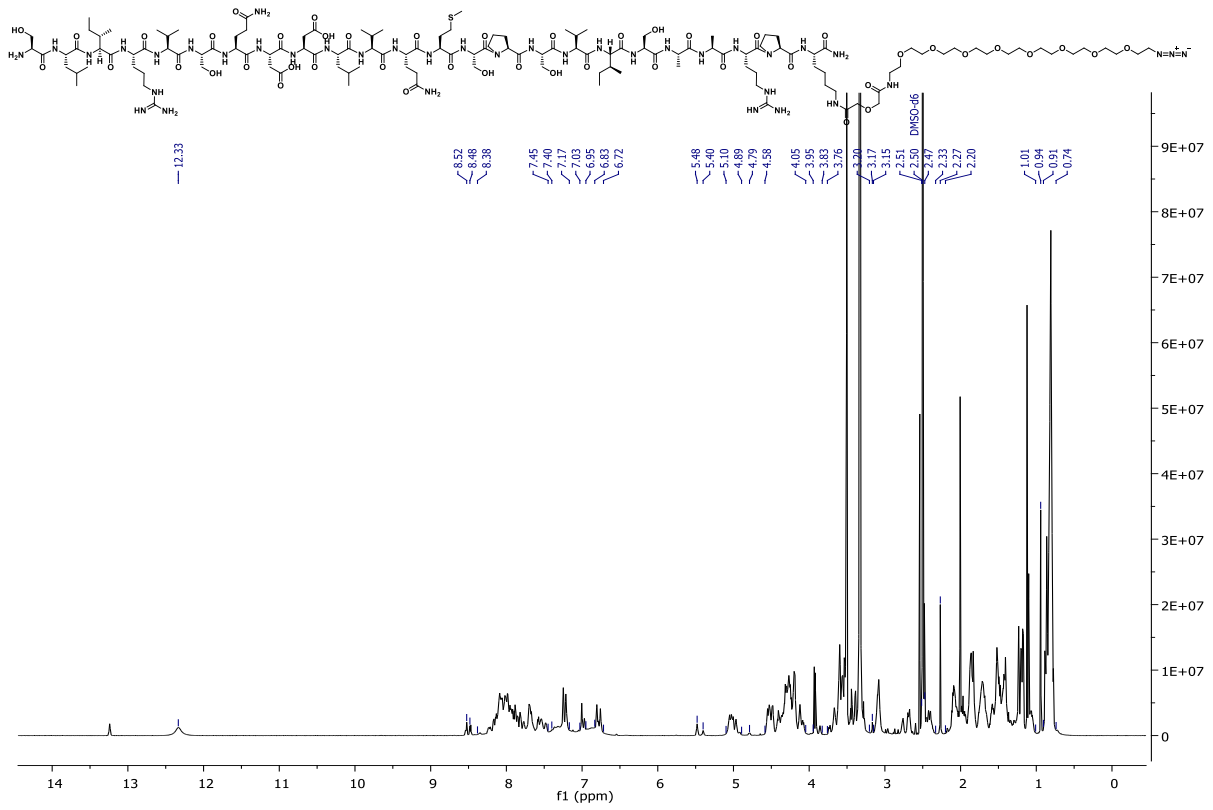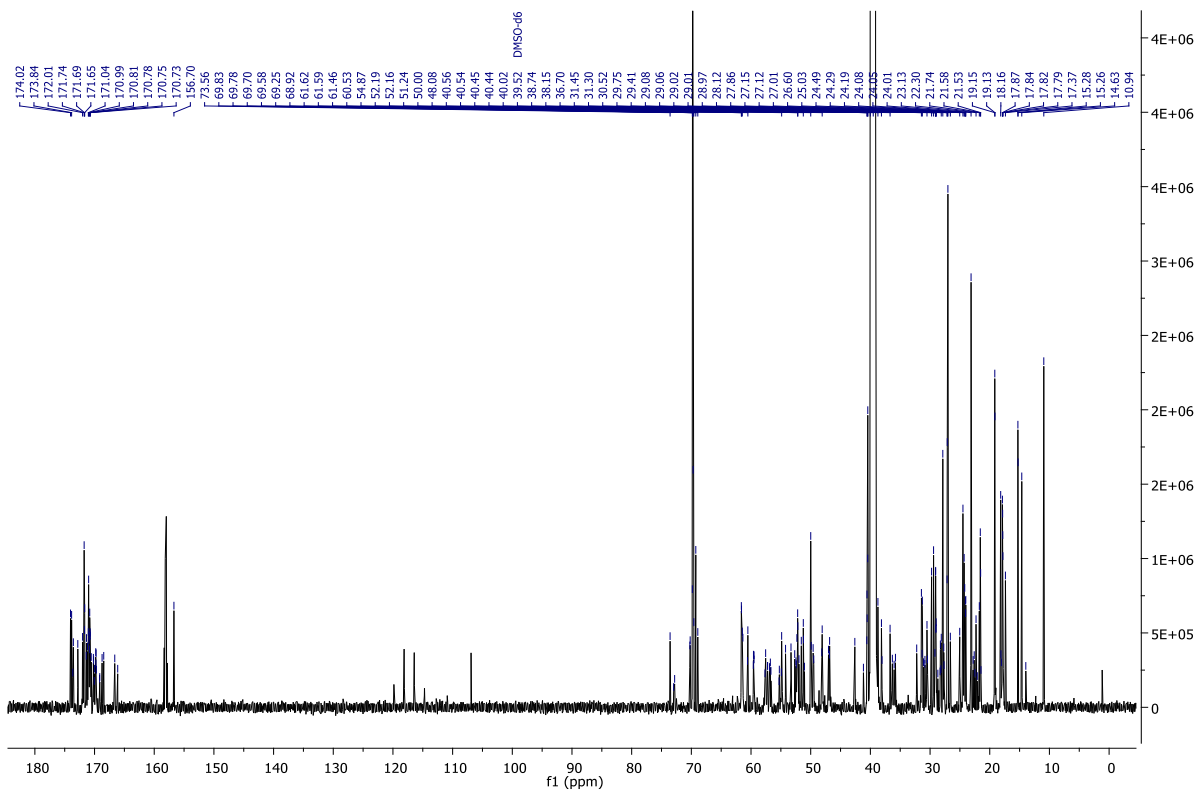

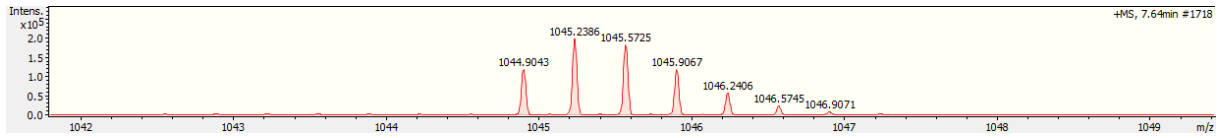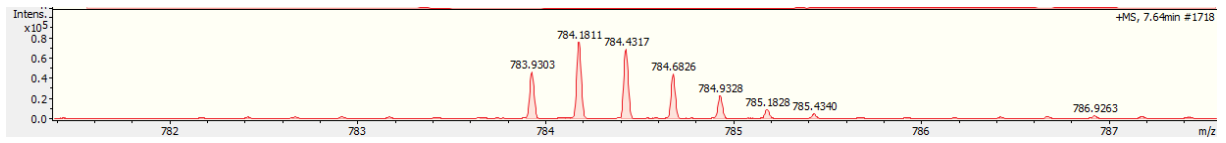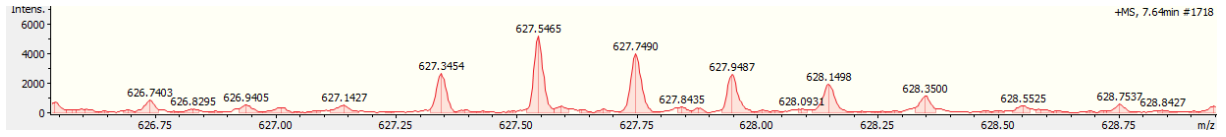



# Compound 67 (*FpvA* 124-134 N-term Carbonyl-(PEG)<sub>7</sub>-azide peptide)

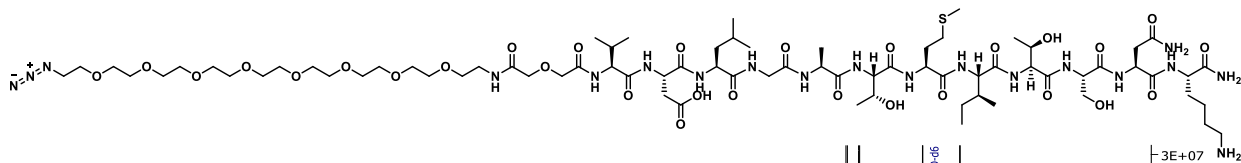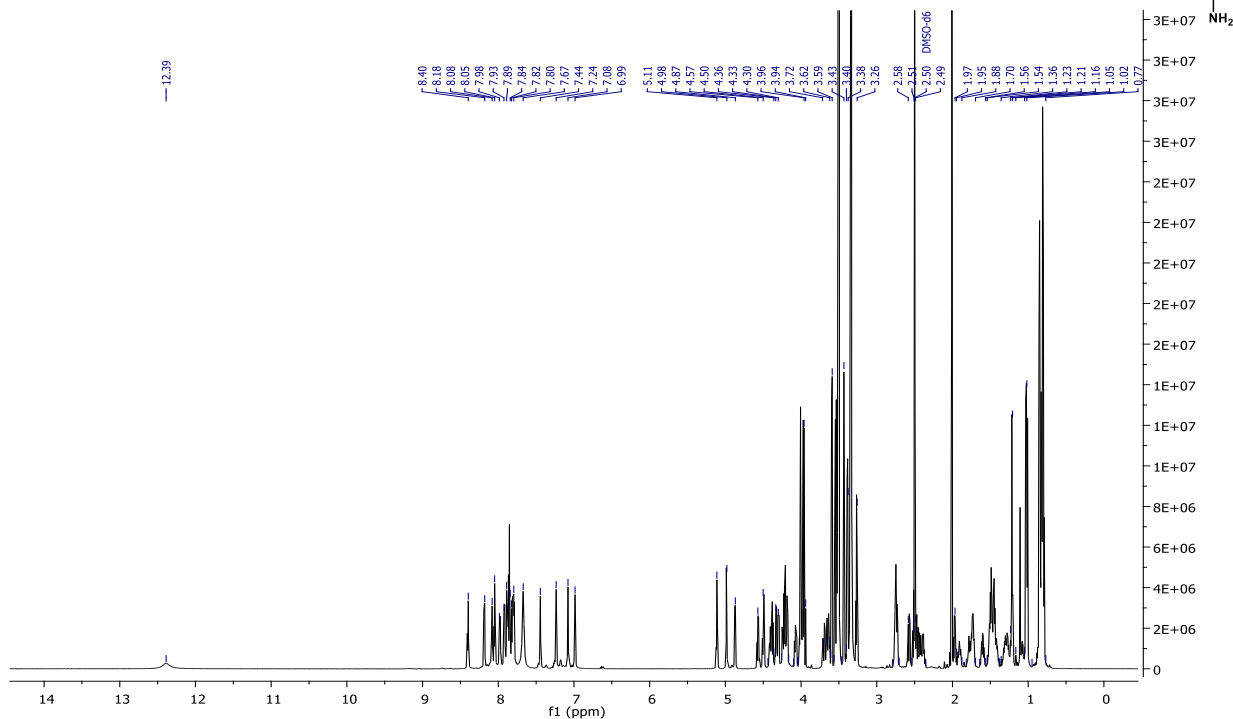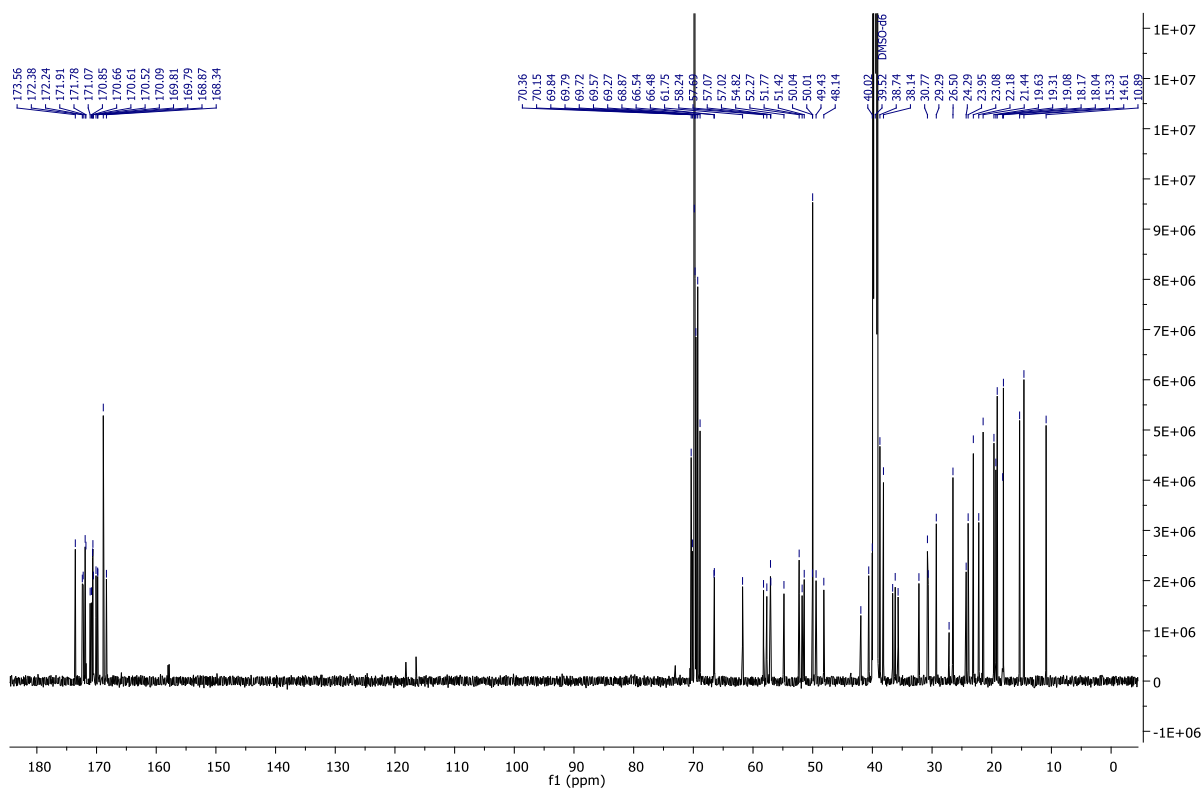

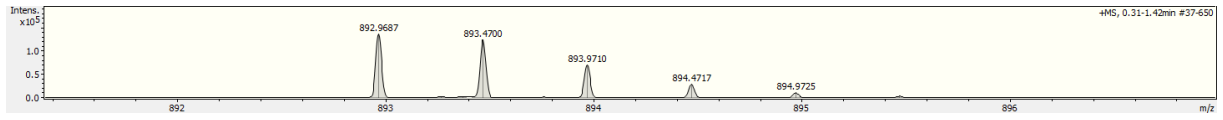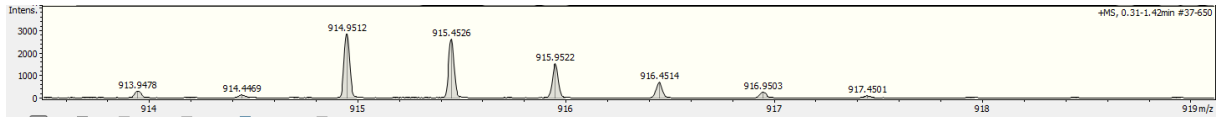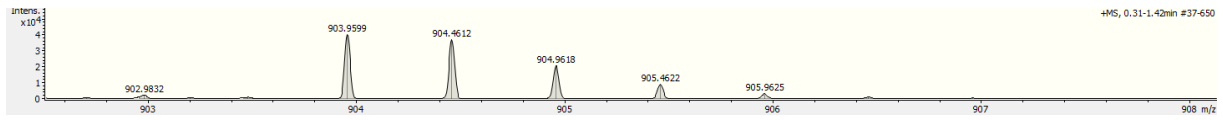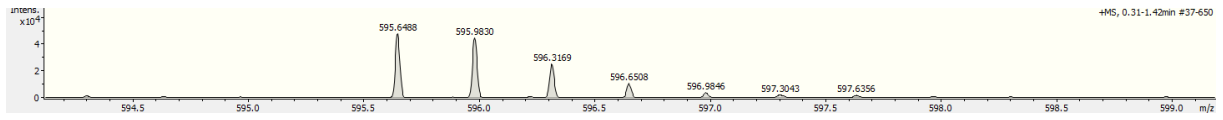





# Compound 70 (*PfeA* 33-51 C-term 3-(Pyridin-2-yl)disulfanyl)propanamide peptide)

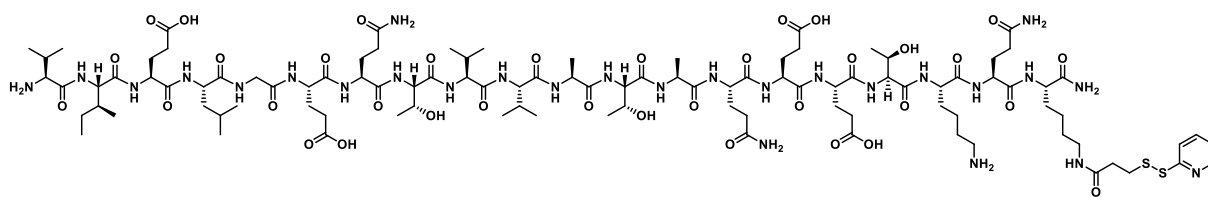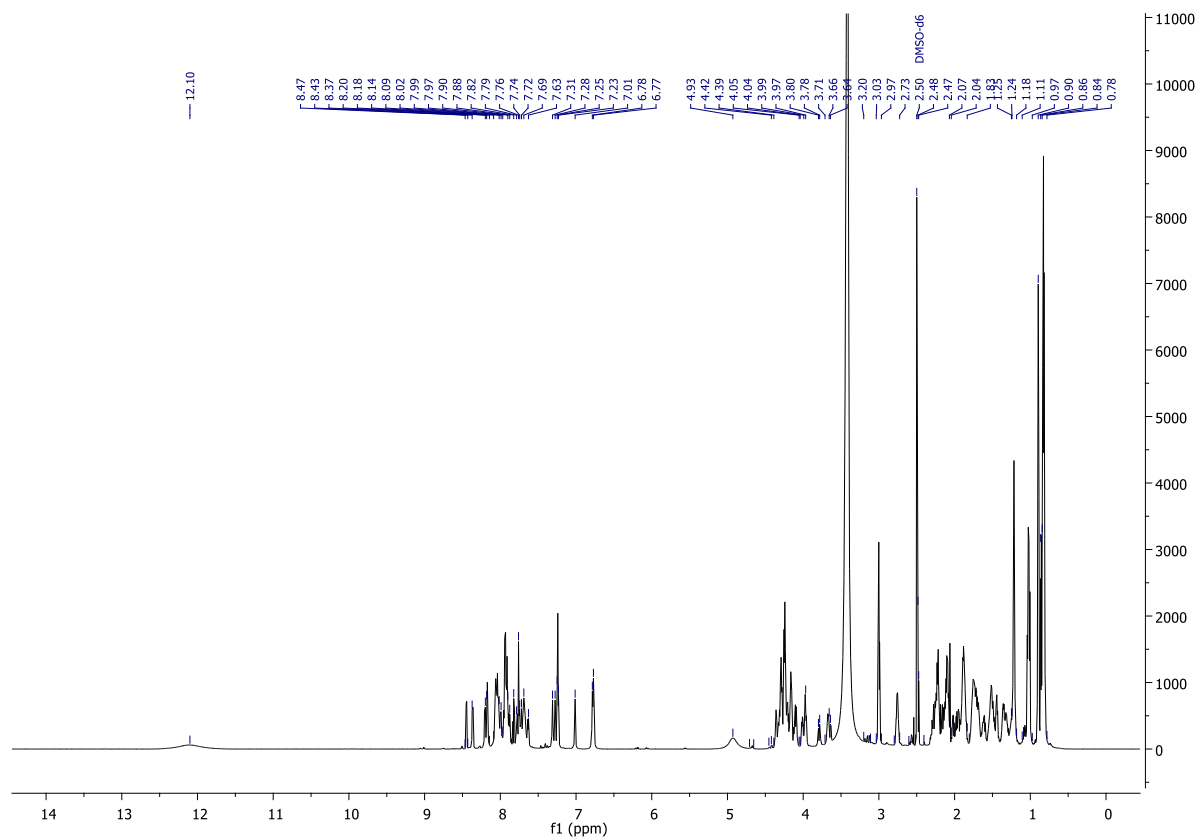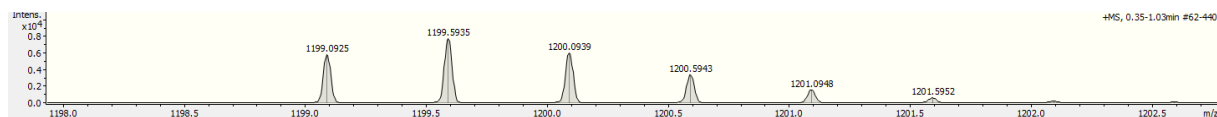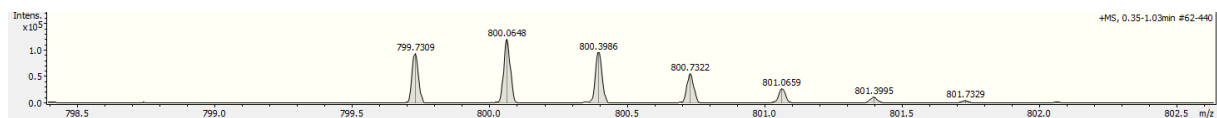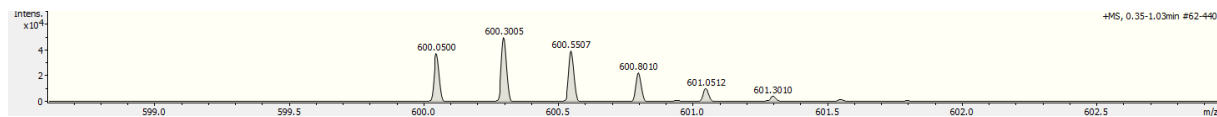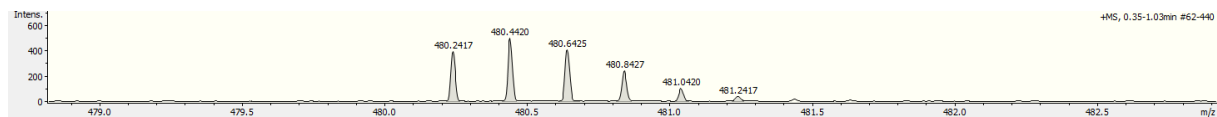

## 2D-NMR data and MS/MS spectra

### *PfeA* 33-51 peptide 6

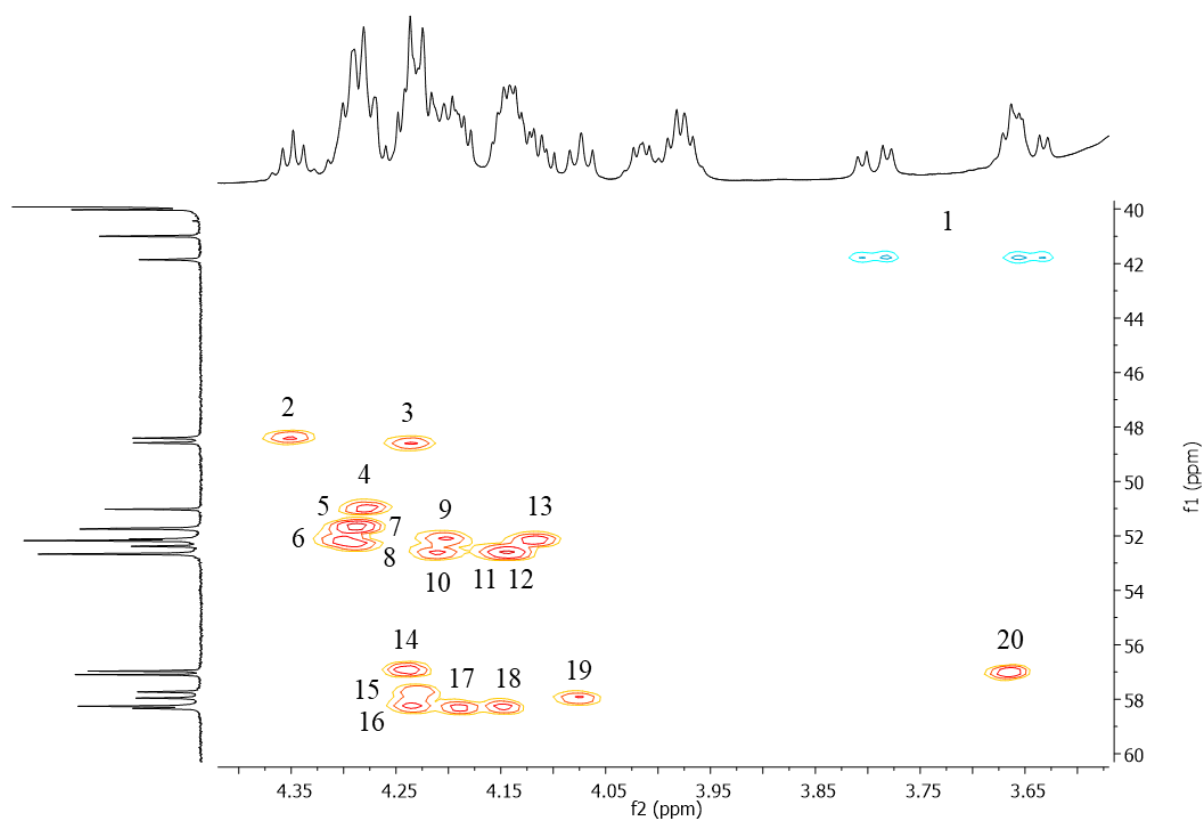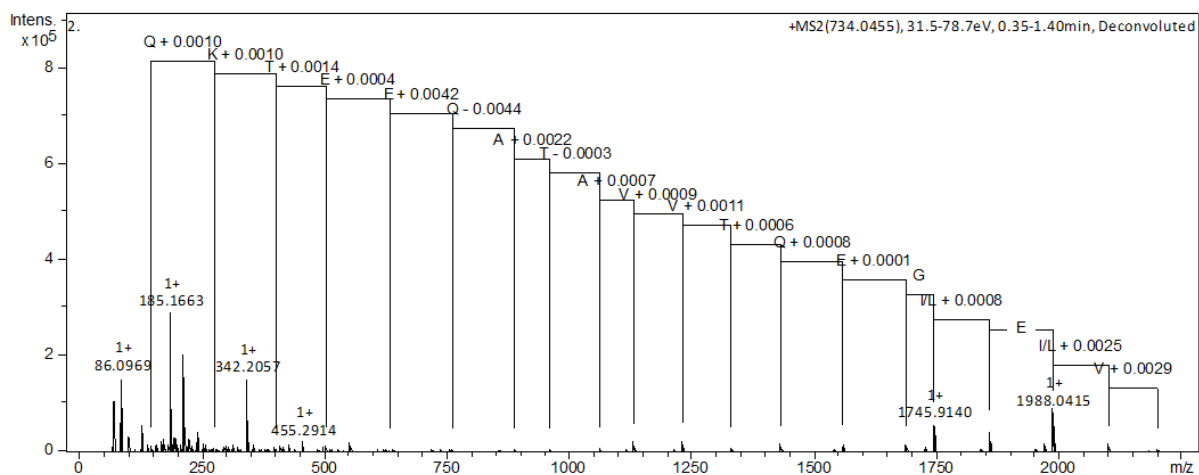

**HasR 122-144 peptide 7**

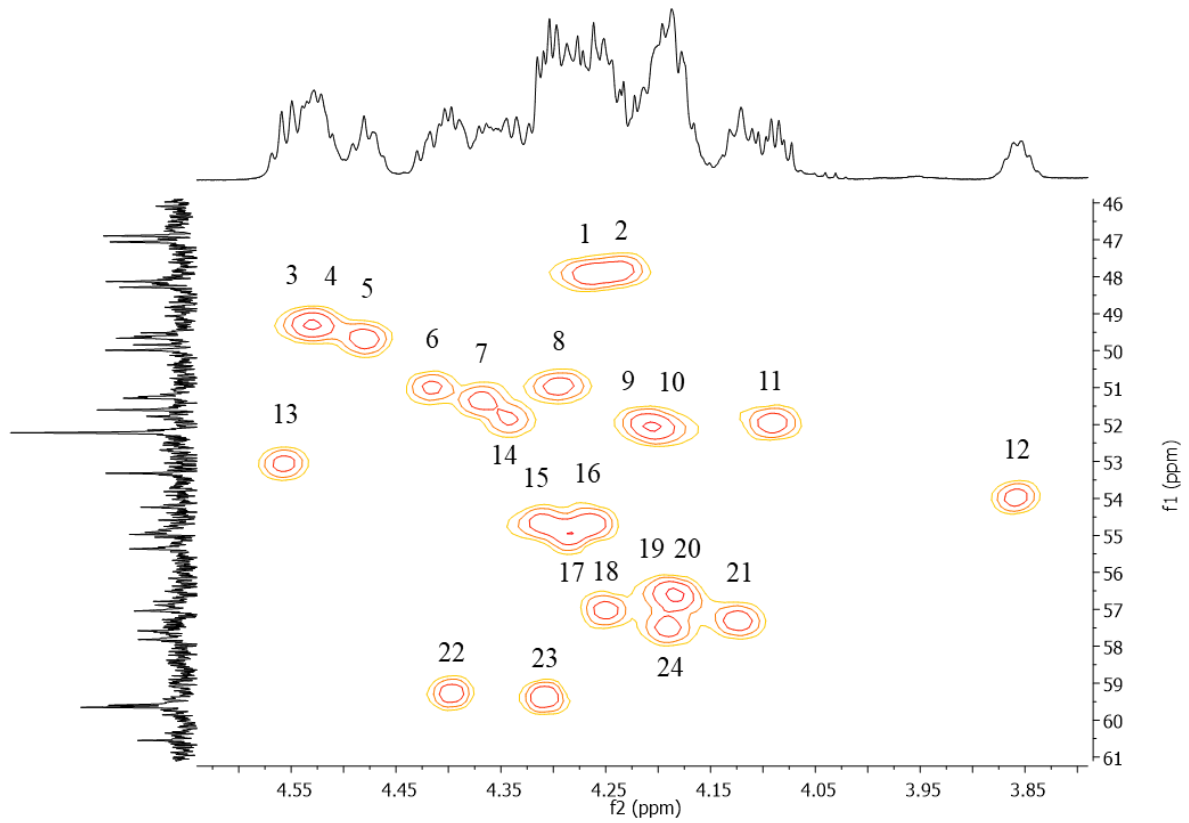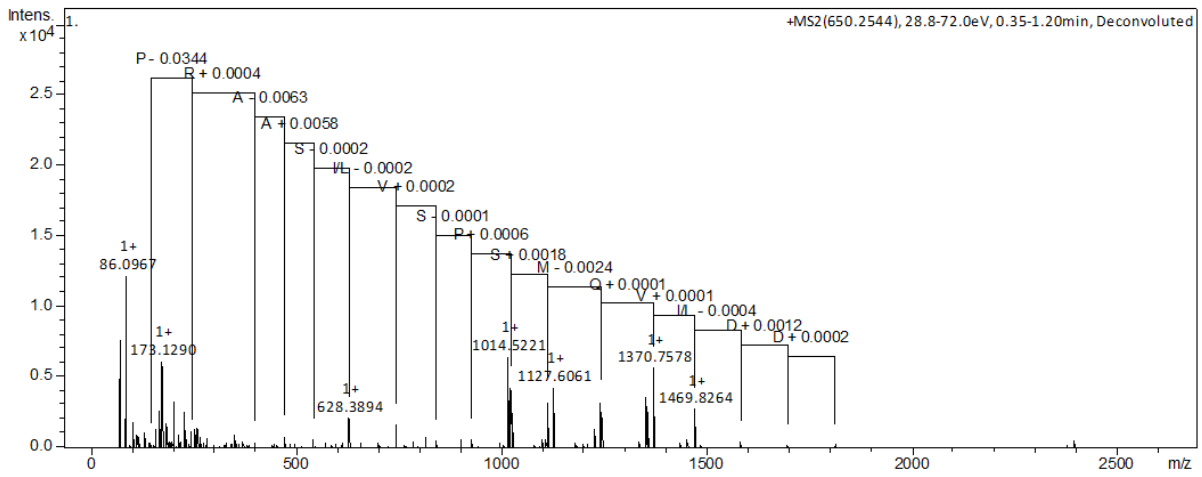

PfeA 37-46 peptide 9

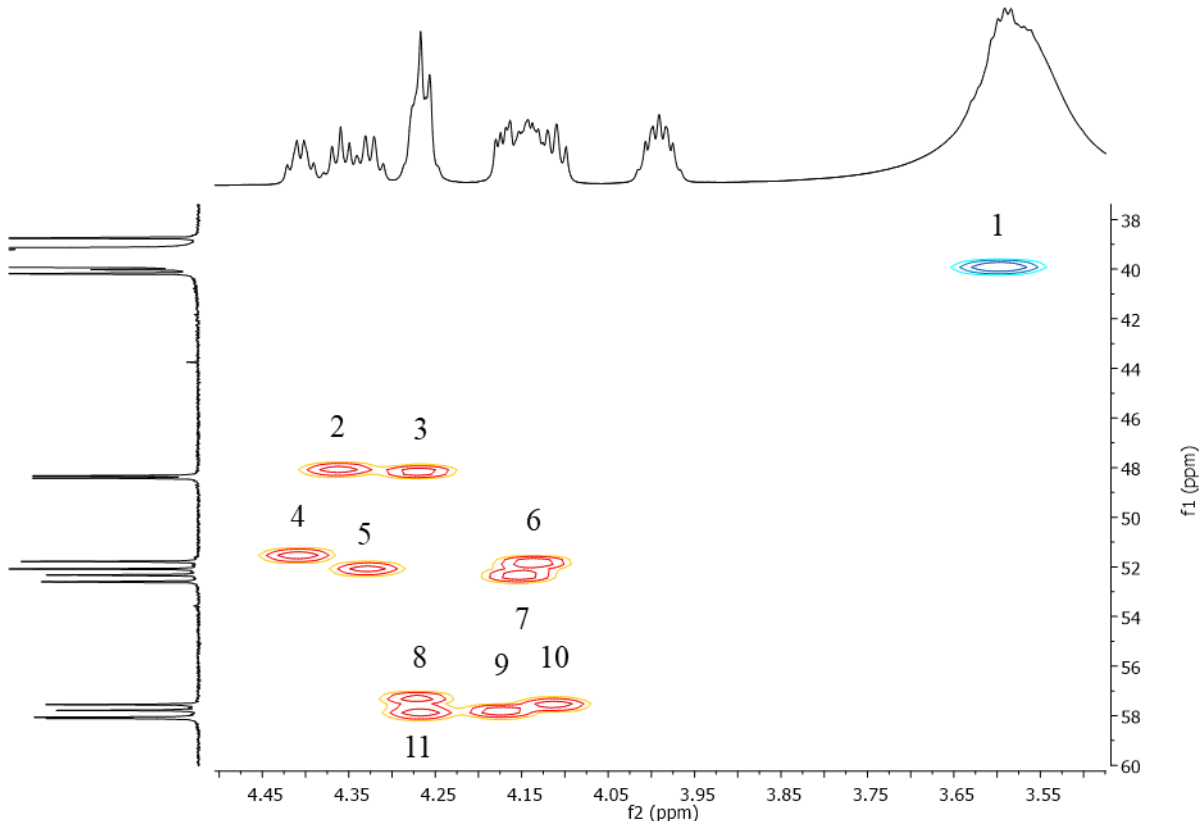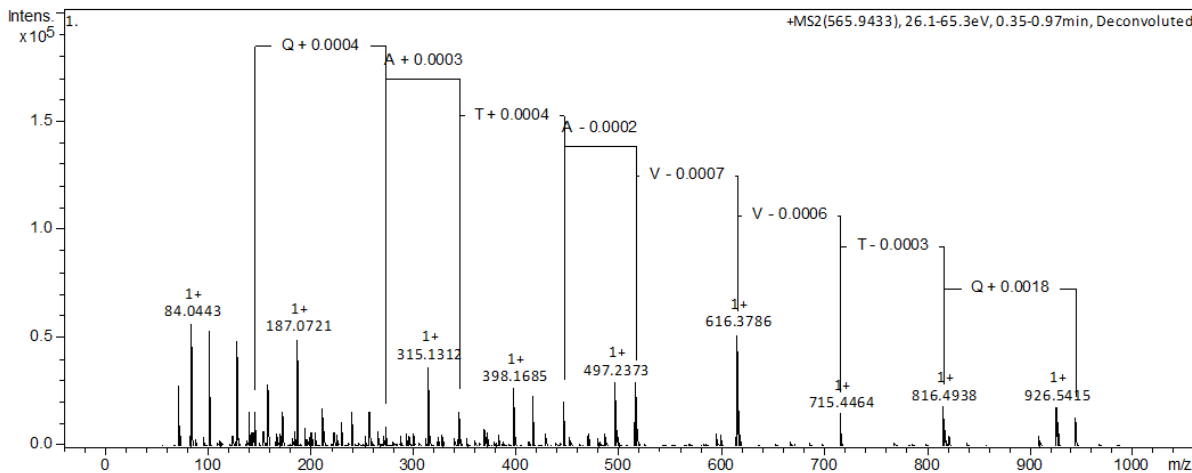



**HasR 129-138 peptide 10**

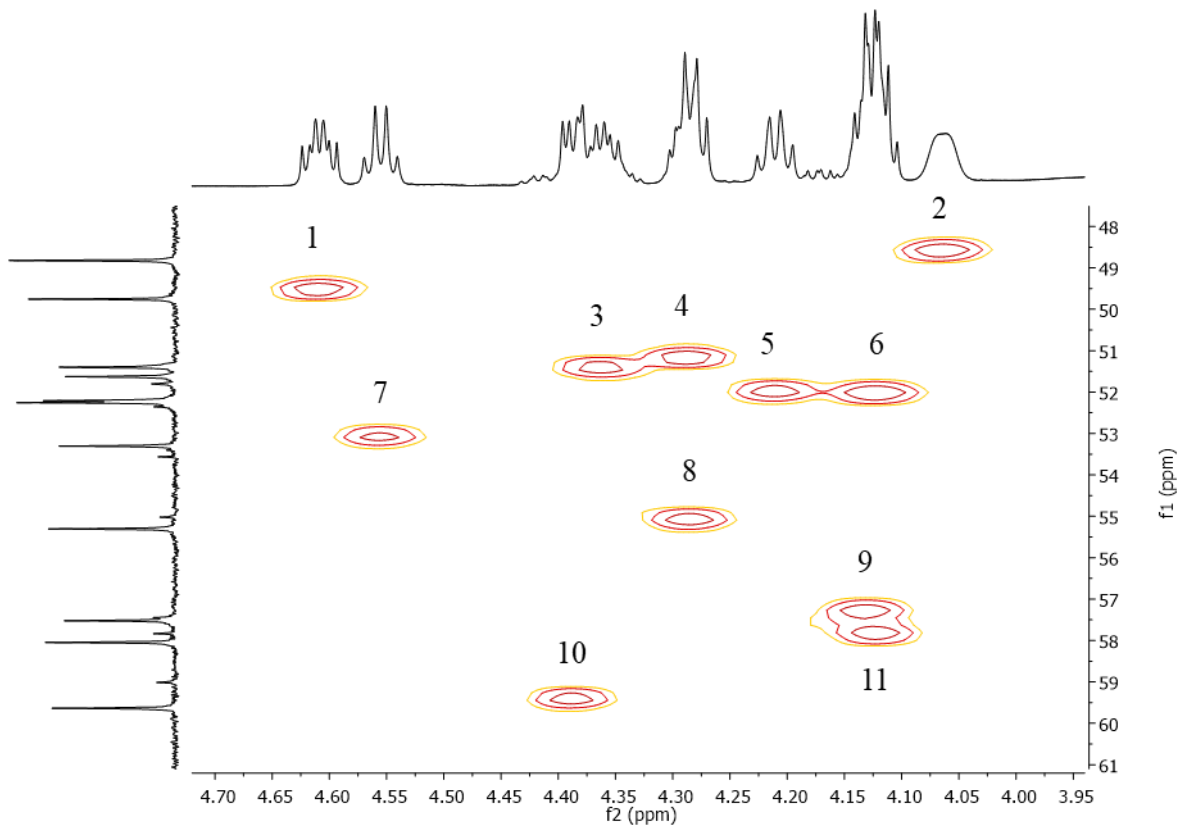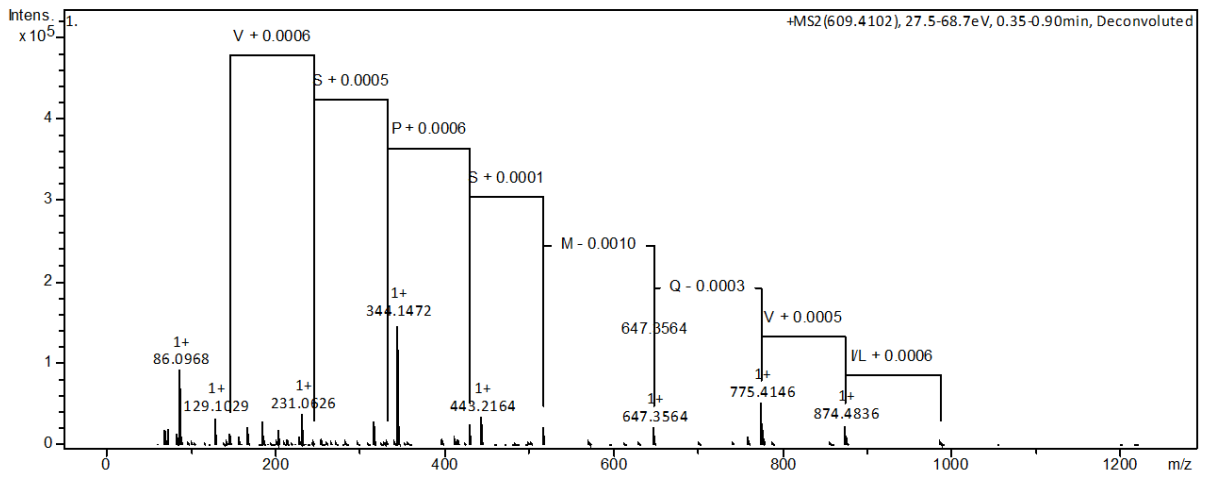

**FpvA 124-134 N-term Carbonyl-(PEG)<sub>7</sub>-azide peptide 61**

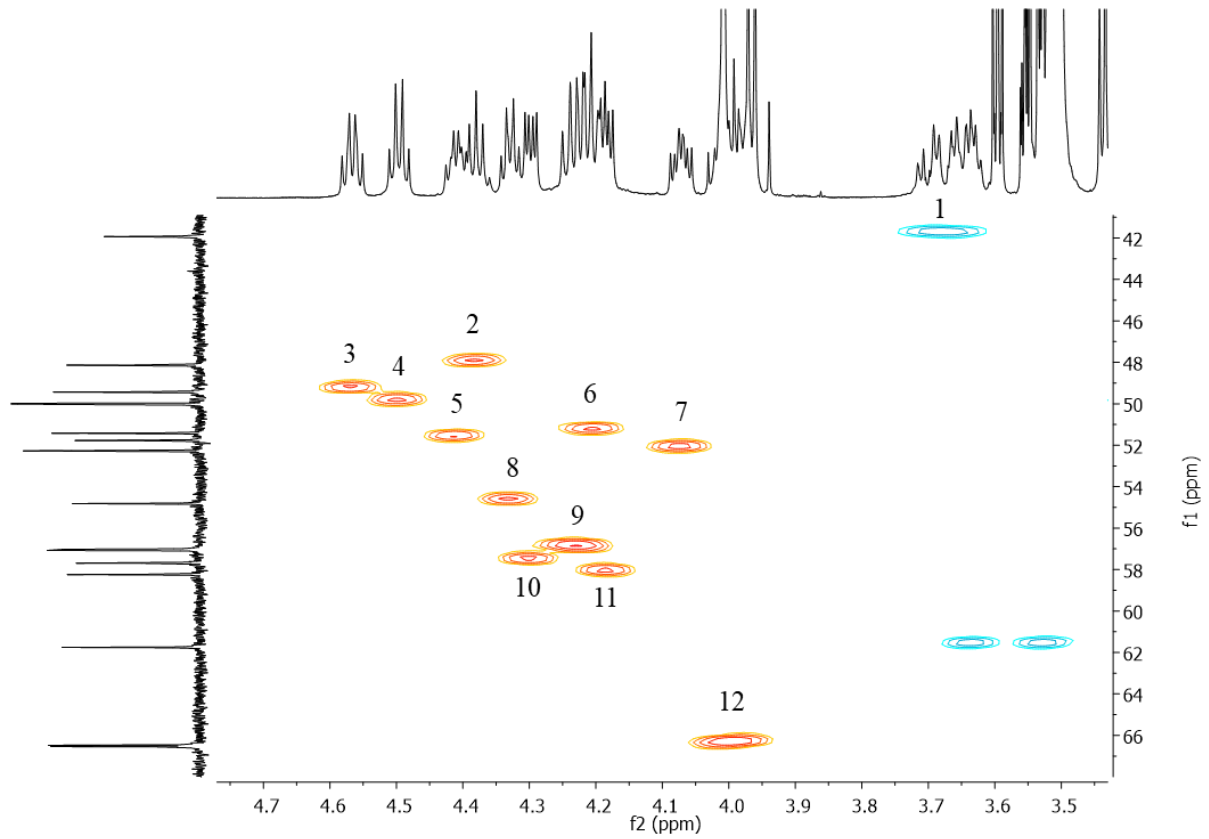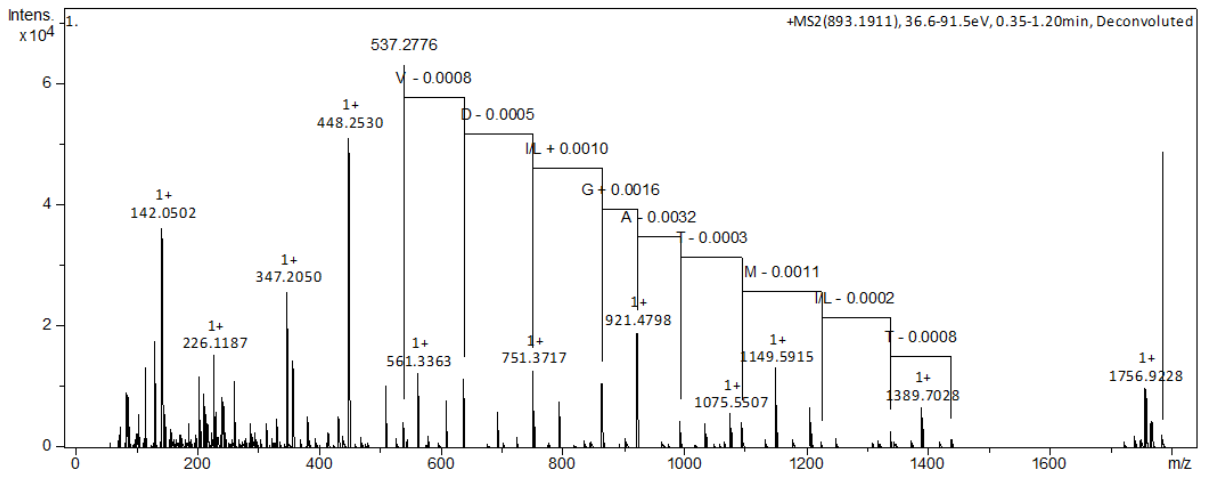

**FpvA 124-134 N-term (PEG)<sub>7</sub>-Zn<sup>2+</sup>-DOTAM 14**

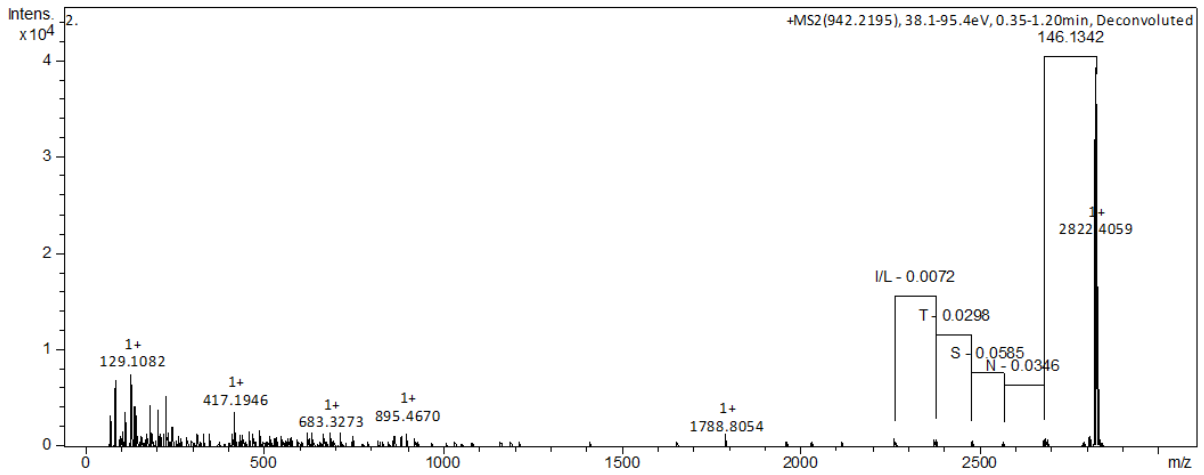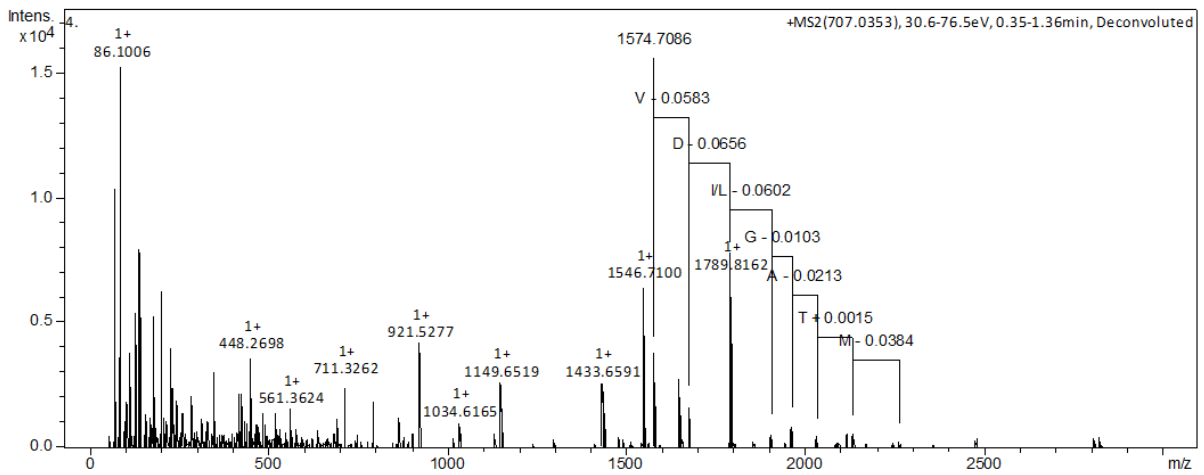

**FpvA 124-134 N-term (PEG)<sub>7</sub>-MECAM-OH 25**

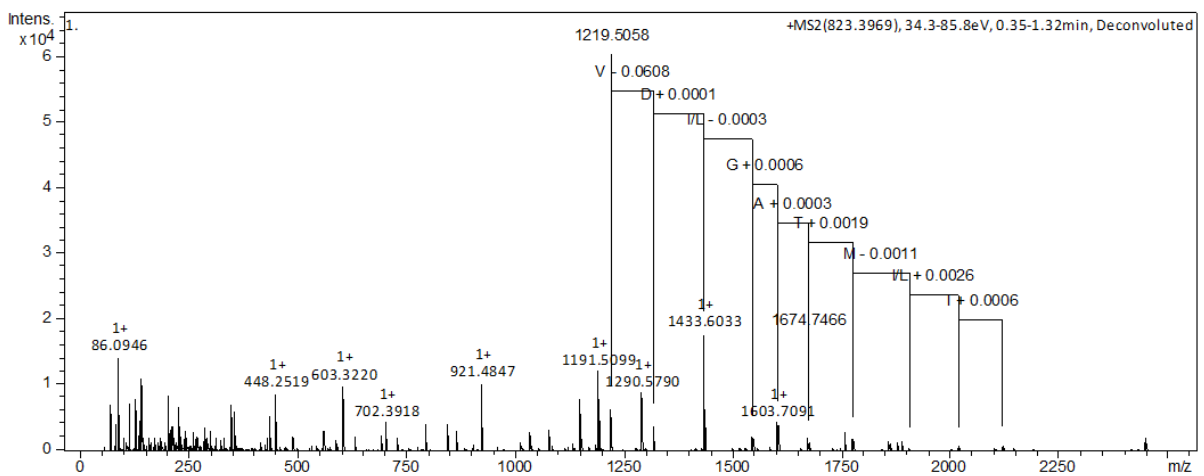

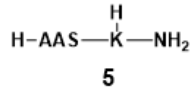

AAS: DSSVDLG\*A\*T\*MITSNQLGTI

Chemical Formula: C<sub>85</sub>H<sub>148</sub>N<sub>24</sub>O<sub>32</sub>S  
 Exact Mass: 2049,04122  
 Molecular Weight: 2050,31500

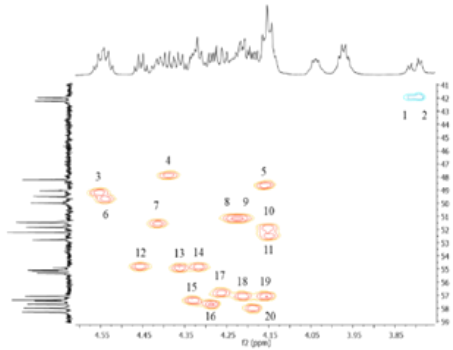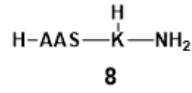

AAS: VDLG\*A\*T\*MITSN

Chemical Formula: C<sub>52</sub>H<sub>93</sub>N<sub>15</sub>O<sub>18</sub>S  
 Exact Mass: 1247,65437  
 Molecular Weight: 1248,46300

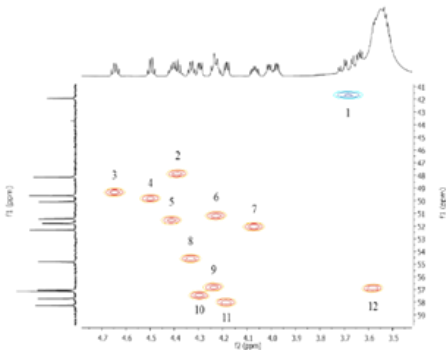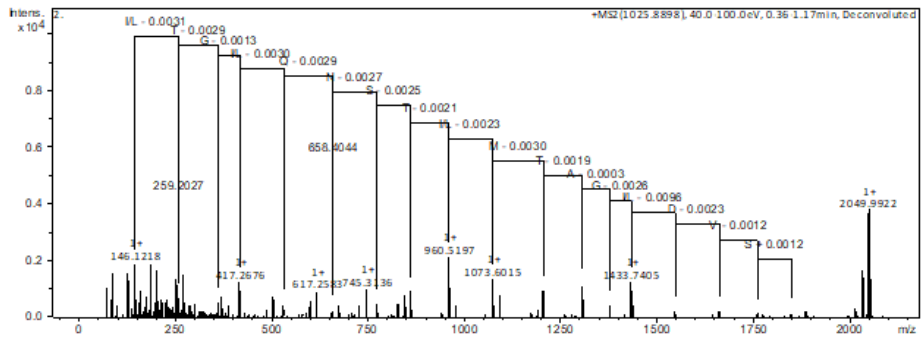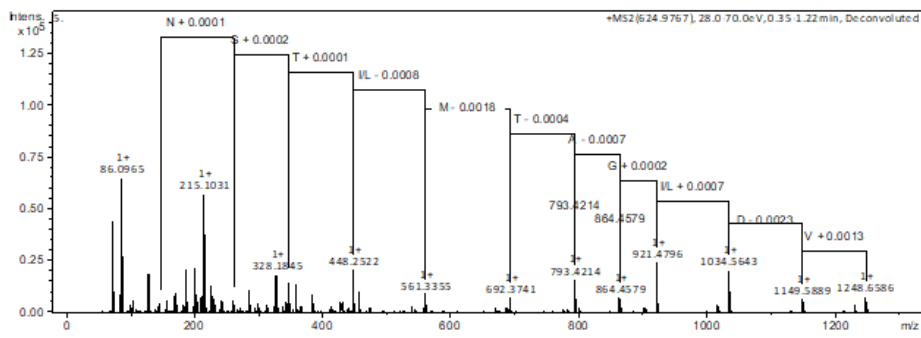

# LC traces

## Compound 2

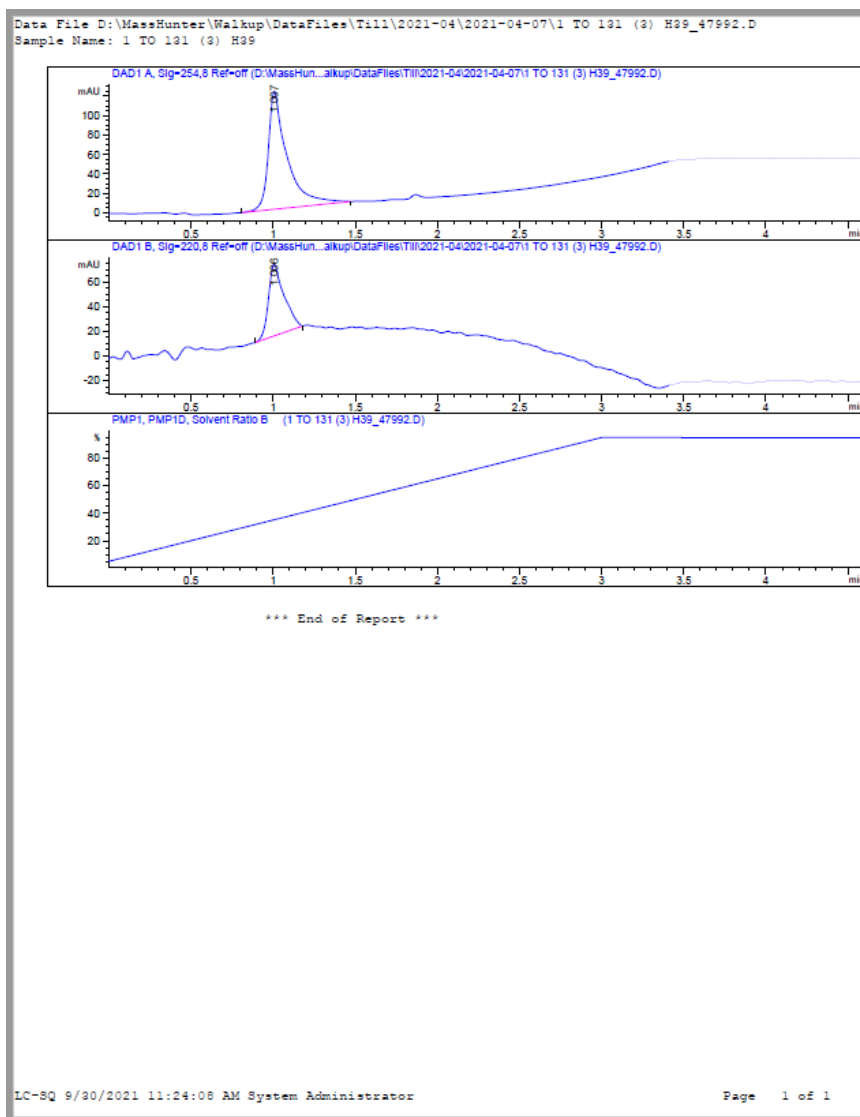

# Compound 4

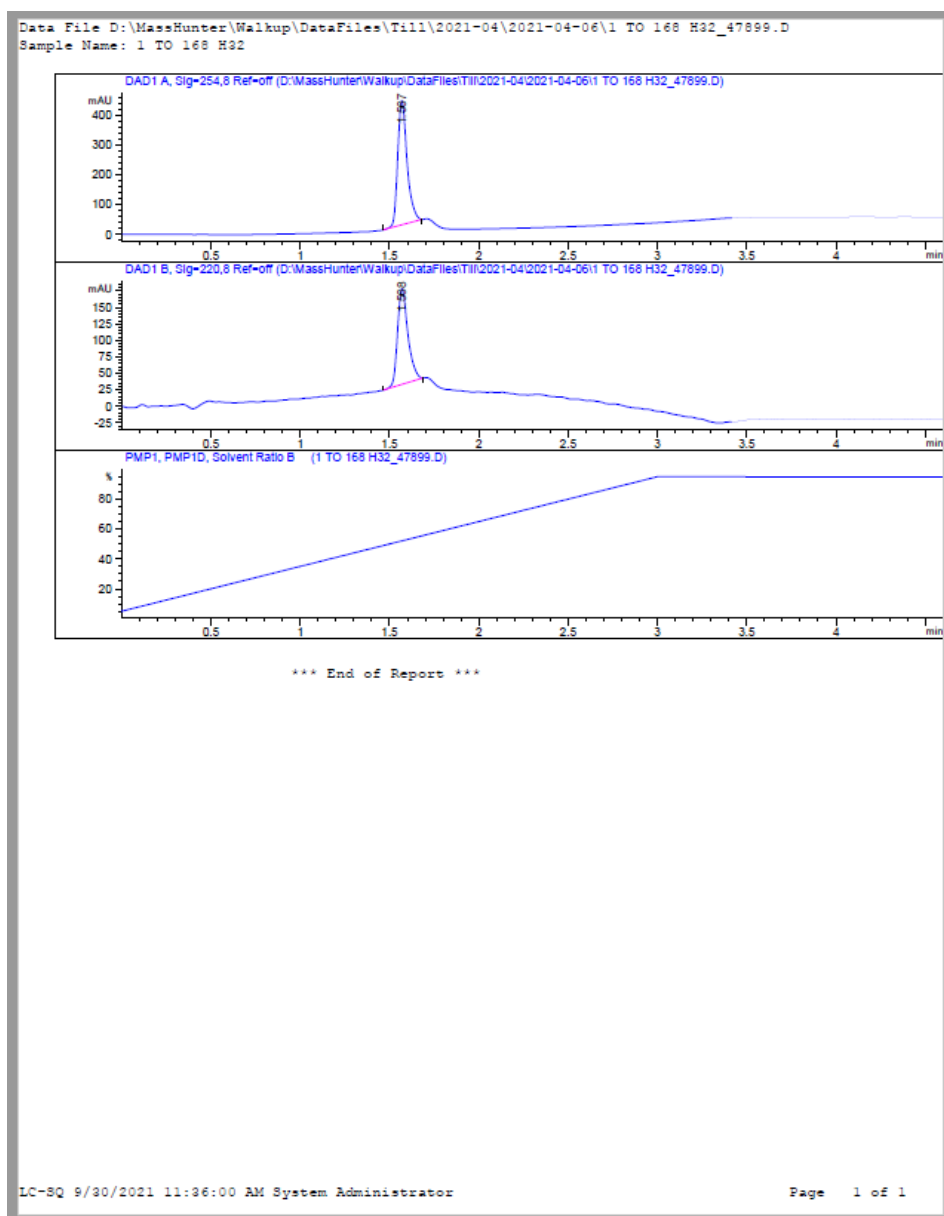

# Compound 5

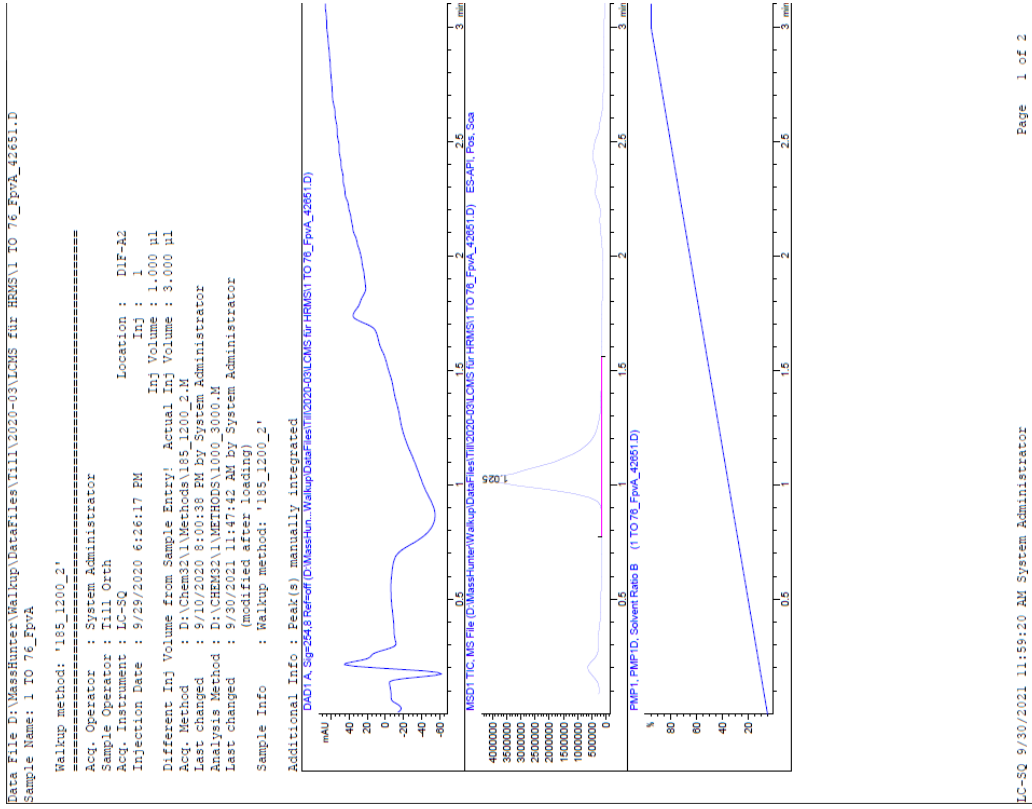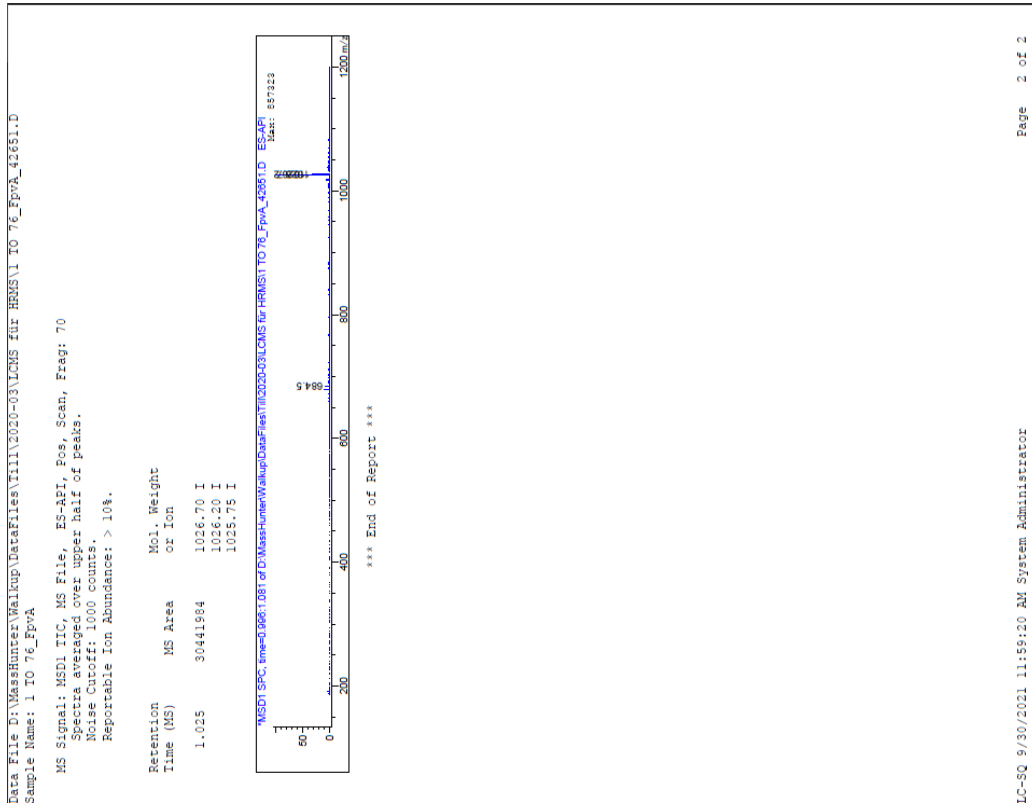

# Compound 6

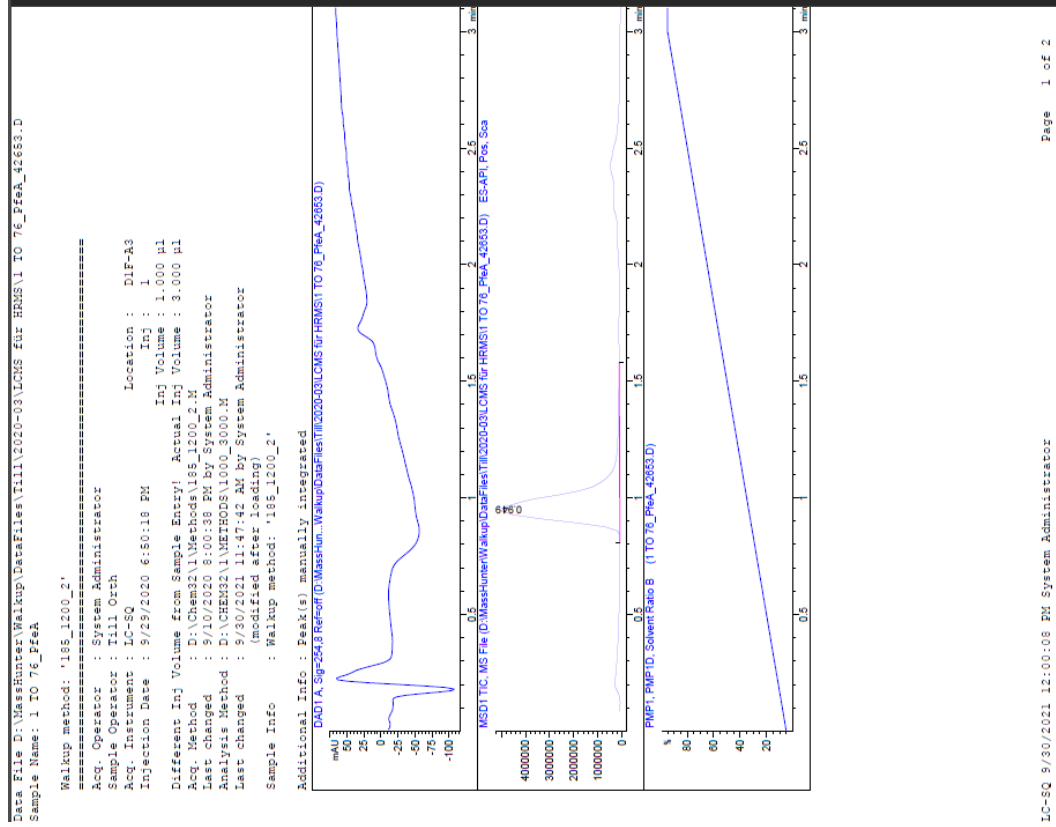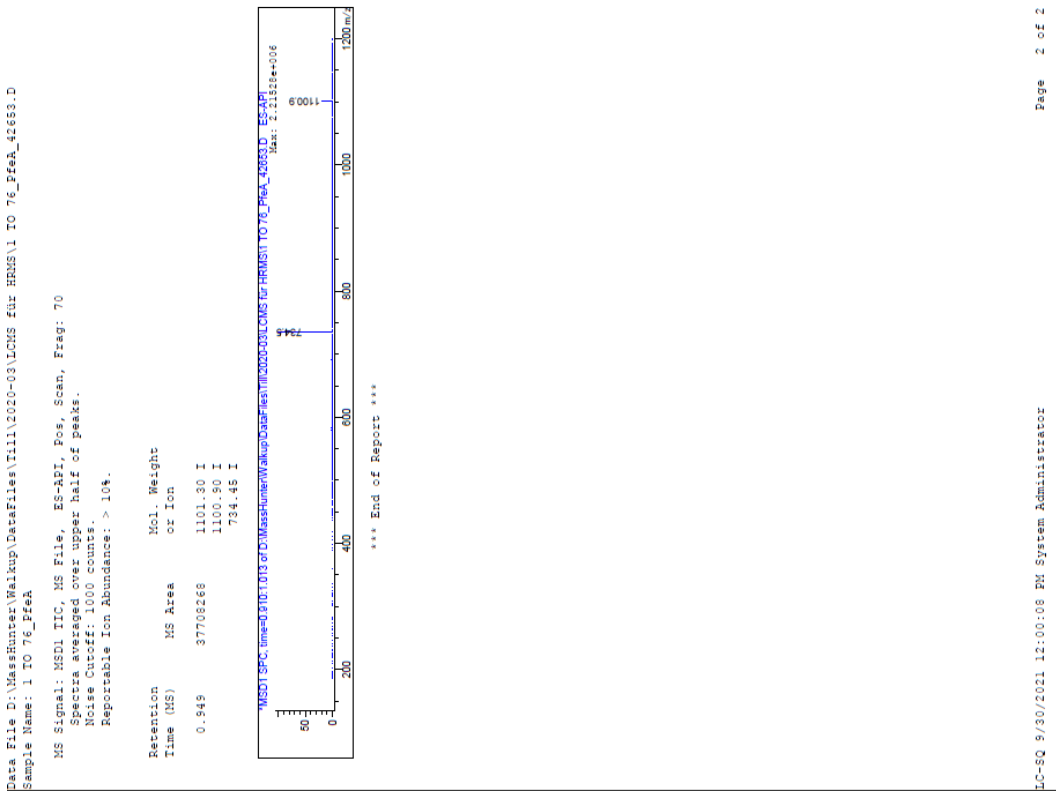



# Compound 7

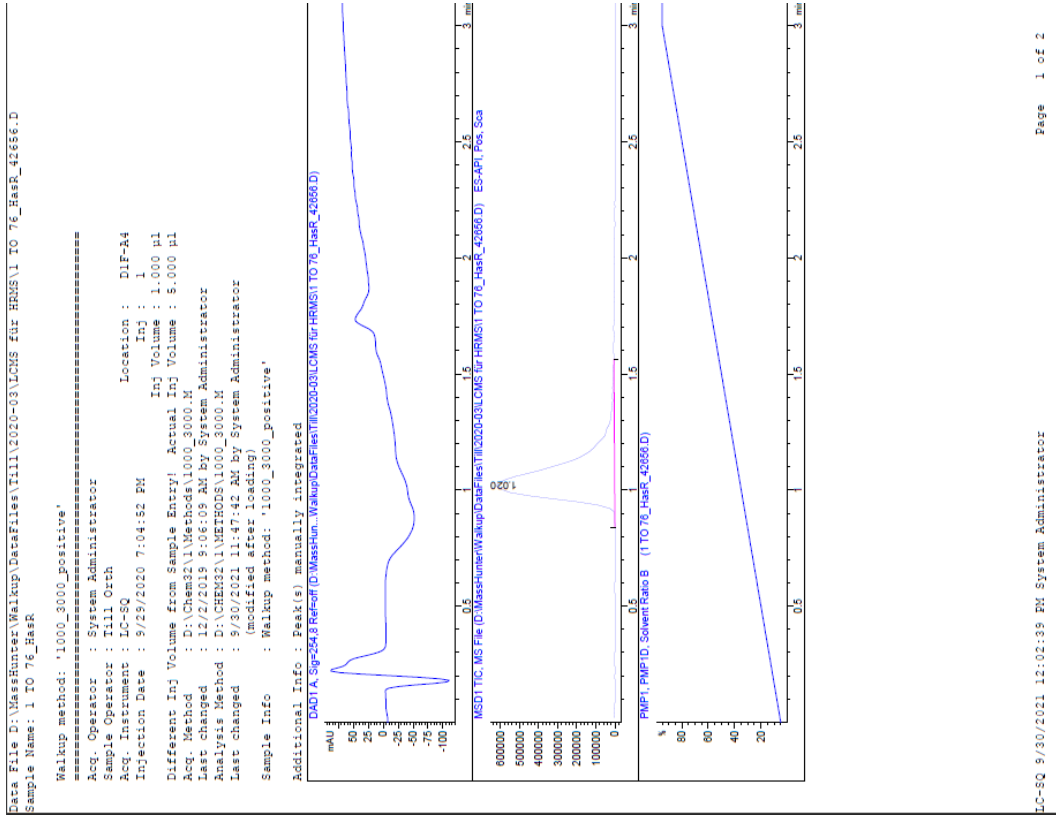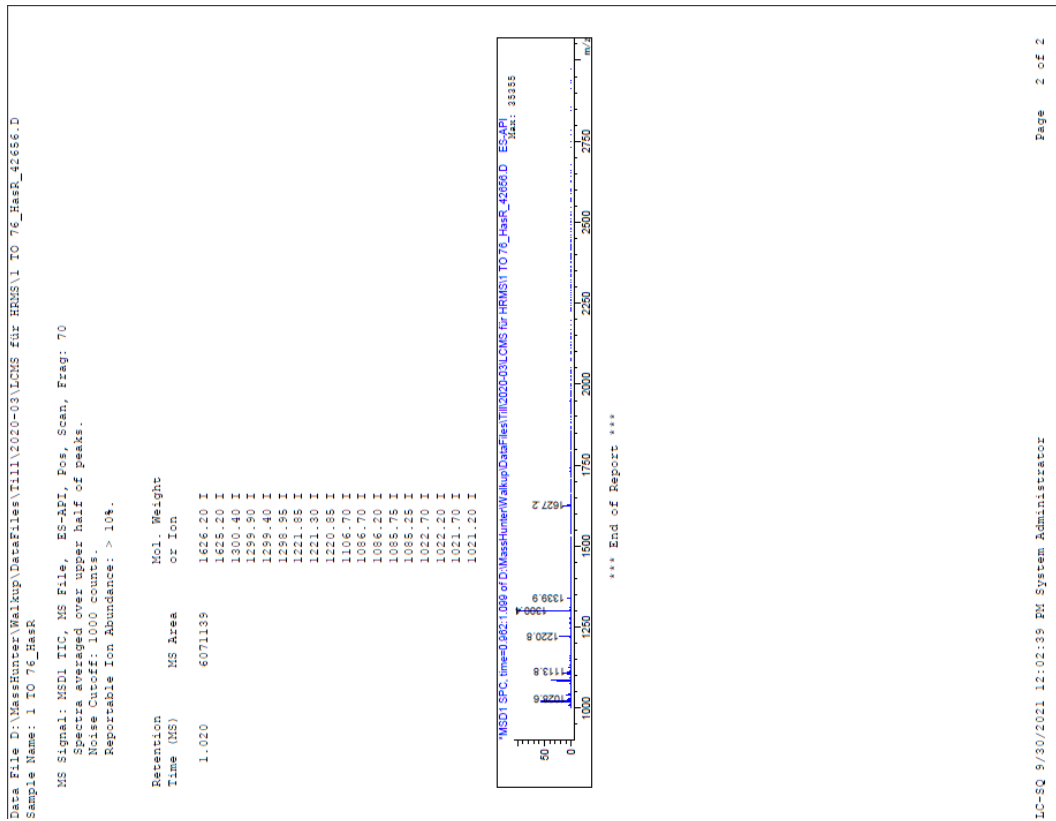

# Compound 8

Data File D:\MassHunter\Walkup\DataFiles\Till\2020-03\LCMS CNRS\FpVA short unmod\_48618.D  
 Sample Name: FpVA short unmod.

Walkup method: '0100-3000-new'  
 =====  
 Acq. Operator : System Administrator  
 Sample Operator : Till Orth  
 Acq. Instrument : LC-SQ  
 Injection Date : 4/13/2021 12:17:37 PM  
 Location : DIF-A6  
 Inj : 1  
 Inj Volume : 1.000 µl  
 Different Inj Volume from Sample Entry! Actual Inj Volume : 0.500 µl  
 Acq. Method : D:\Chem22\Methods\100-3000-new.M  
 Last changed : 3/25/2021 7:12:45 PM By System Administrator  
 Analysis Method : D:\Chem22\Methods\Water\_Rinse\_95%.M  
 Last changed : 5/20/2022 8:22:22 PM By System Administrator  
 Method Info : (modified after loading)  
 Method Info : Water Rinse 95%

Sample Info : Walkup method: '0100-3000-new'

Additional Info : Peak(s) manually integrated  
 MSD1.TIC, MS File (D:\MassHunter\Walkup\DataFiles\Till\2020-03\LCMS CNRS\FpVA short unmod\_48618.D) ES-AP, Pos. Sc

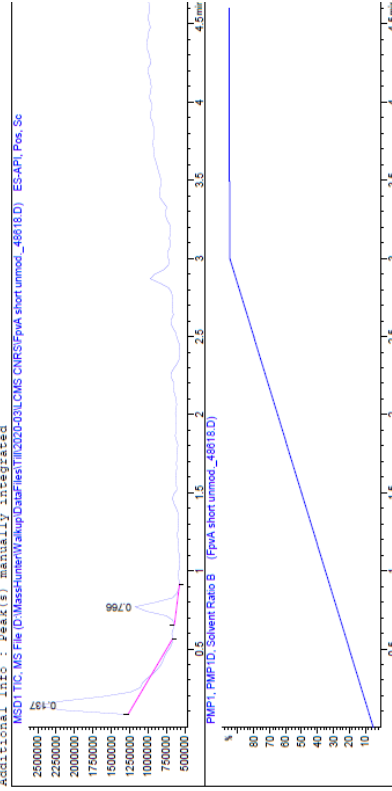

Data File D:\MassHunter\Walkup\DataFiles\Till\2020-03\LCMS CNRS\FpVA short unmod\_48618.D  
 Sample Name: FpVA short unmod.

MS Signal: MSD1 TIC, MS File, ES-AP, Pos, Scan, Frag: 70  
 Spectra averaged over upper half of peaks.  
 Noise Cutoff: 500 counts.  
 Reportable Ion Abundance: > 10%.

| Retention Time (MS) | MS Area | Mol. Weight or Ion |
|---------------------|---------|--------------------|
| 0.137               | 6476773 | 179.00 I           |
| 0.766               | 2615125 | 157.10 I           |
|                     |         | 624.90 I           |
|                     |         | 179.00 I           |
|                     |         | 187.10 I           |
|                     |         | 101.10 I           |

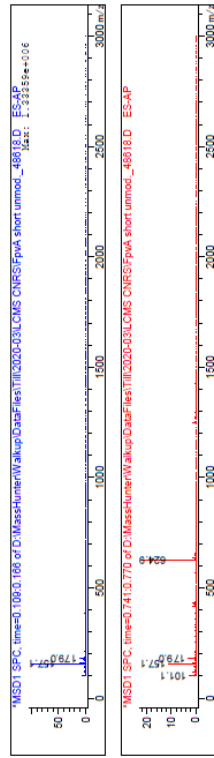

\*\*\* End of Report \*\*\*

# Compound 9

Data File D:\MassHunter\Walkup\DataFiles\T111\2020-03\LCMS\_CNRS\FEA short unmod.\_48619.D  
 Sample Name: FEA short unmod.

Walkup method: '0100-3000-new'  
 =====  
 Acq. Operator : System Administrator  
 Sample Operator : Till Orth  
 Acq. Instrument : LC-SQ  
 Injection Date : 4/19/2021 12:23:46 PM  
 Location : DIF-A7  
 Inj : 1  
 Inj Volume : 1.000 µl  
 Different Inj Volume from Sample Entry! Actual Inj Volume : 0.500 µl  
 Acq. Method : D:\Chem321\Methods\100-3000-new.M  
 Last changed : 3/25/2021 7:12:45 PM By System Administrator  
 Analysis Method : D:\Chem321\Methods\Water\_Rinse\_96.M  
 Last changed : 5/20/2022 8:22:22 PM By System Administrator  
 Method Info : (modified after loading)  
 Method Info : Water Rinse 96%

Sample Info : Walkup method: '0100-3000-new'  
 Additional Info : Peak(s) manually integrated  
 MSD1 TIC: MS File (D:\MassHunter\Walkup\DataFiles\T111\2020-03\LCMS\_CNRS\FEA short unmod.\_48619.D) ES-AP, Pos. Sc

MSD1 TIC: MS File (D:\MassHunter\Walkup\DataFiles\T111\2020-03\LCMS\_CNRS\FEA short unmod.\_48619.D) ES-AP, Pos. Sc

PMPI: PMPI.D, Solvent Ratio B (PEA short unmod.\_48619.D)

PMPI: PMPI.D, Solvent Ratio B (PEA short unmod.\_48619.D)

LC-SQ 5/21/2022 2:23:38 PM System Administrator Page 1 of 2

Data File D:\MassHunter\Walkup\DataFiles\T111\2020-03\LCMS\_CNRS\FEA short unmod.\_48619.D  
 Sample Name: FEA short unmod.

MS Signal: MSD1 TIC, MS File, ES-AP, Pos, Scan, Frag: 70  
 Spectra averaged over upper half of peaks.  
 Noise Cutoff: 500 counts.  
 Reportable Ion Abundance: > 10%.

| Retention Time (MS) | MS Area | Mol. Weight or Ion |
|---------------------|---------|--------------------|
| 0.131               | 4157878 | 179.00 I           |
| 0.368               | 1558976 | 187.05 I           |
|                     |         | 566.40 I           |
|                     |         | 568.90 I           |
|                     |         | 179.00 I           |
|                     |         | 187.10 I           |
|                     |         | 101.05 I           |

MSD1 SPC: time=0.1020.108 of D:\MassHunter\Walkup\DataFiles\T111\2020-03\LCMS\_CNRS\FEA short unmod.\_48619.D ES-AP  
 Peak: 1.20542e+006

MSD1 SPC: time=0.3320.308 of D:\MassHunter\Walkup\DataFiles\T111\2020-03\LCMS\_CNRS\FEA short unmod.\_48619.D ES-AP

\*\*\* End of Report \*\*\*

LC-SQ 5/21/2022 2:23:38 PM System Administrator Page 2 of 2

# Compound 10

Data File D:\MassHunter\Walkup\DataFiles\T111\2020-03\LCMS CNRS\HaSR short unmod.\_48620.D  
 Sample Name: HaSR short unmod.

MS Signal: MSD1 TIC, MS File, ES-API, Pos, Scan, Frag: 70  
 Spectra averaged over upper half of peaks.  
 Noise Cutoff: 500 counts.  
 Reportable Ion Abundance: > 10%.

| Retention Time (MS) | MS Area | Mol. Weight or Ion |
|---------------------|---------|--------------------|
| 0.125               | 1497478 | 179.00 I           |
|                     |         | 189.00 I           |
|                     |         | 187.10 I           |
| 0.743               | 1830988 | 609.90 I           |
|                     |         | 609.30 I           |
|                     |         | 179.00 I           |
|                     |         | 142.10 I           |
|                     |         | 120.10 I           |
|                     |         | 101.10 I           |

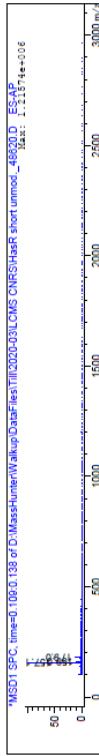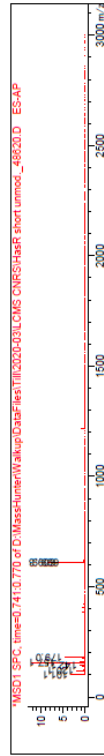

\*\*\* End of Report \*\*\*

Data File D:\MassHunter\Walkup\DataFiles\T111\2020-03\LCMS CNRS\HaSR short unmod.\_48620.D  
 Sample Name: HaSR short unmod.

Walkup method: '0100-3000-new'  
 =====  
 Acq. Operator : System Administrator  
 Sample Operator : Till Orth  
 Acq. Instrument : LC-90  
 Injection Date : 4/19/2021 12:29:56 PM  
 Location : DIF-A8  
 Inj : 1  
 Inj Volume : 1.000 µl  
 Different Inj Volume from Sample Entry! Actual Inj Volume : 0.800 µl  
 Acq. Method : D:\Chem321\Methods\100-3000-new.M  
 Last changed : 3/25/2021 7:12:45 PM By System Administrator  
 Analysis Method : D:\Chem321\Methods\Water\_Raise\_98%.M  
 Last changed : 5/20/2022 8:22:22 PM By System Administrator  
 (modified after loading)  
 Method Info : Water Rinse 98%

Sample Info : Walkup method: '0100-3000-new'

Additional Info : Peak(s) manually integrated  
 MSD1 TIC, MS File (D:\MassHunter\Walkup\DataFiles\T111\2020-03\LCMS CNRS\HaSR short unmod.\_48620.D) ES-API, Pos, Sc

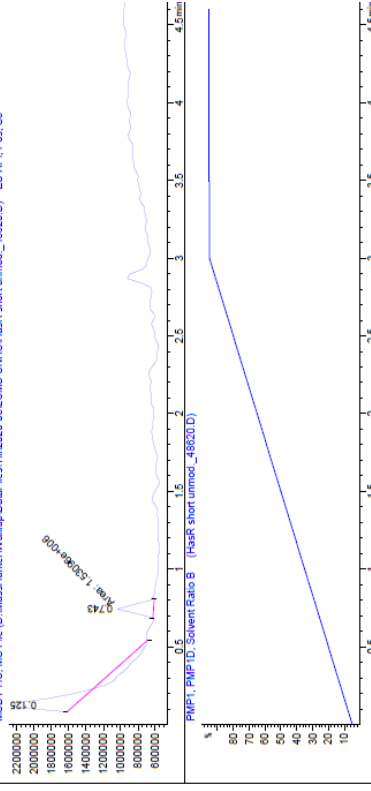

# Compound 11

Data File D:\MassHunter\Walkup\DataFiles\Till\2020-07\2020-07-22\1 TO 70 H20\_38969.D  
Sample Name: 1 TO 70 H20

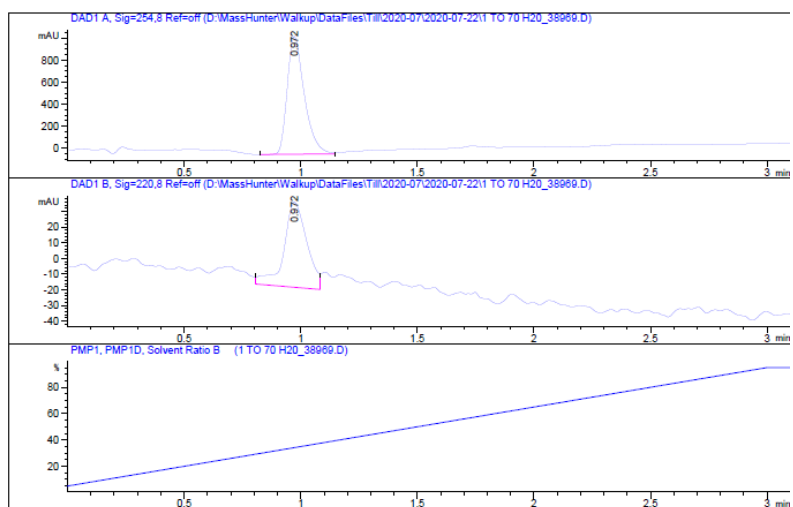

\*\*\* End of Report \*\*\*

Compound 12

Data File D:\MassHunter\Walkup\DataFiles\T111\2020-05\2020-05-01\1 TO 90 H2S\_40470.D  
 Sample Name: 1 TO 90 H2S

MS Signal: MSD1 TIC, MS File, ES-API, Pos. Scan, Frag: 70  
 Spectra averaged over upper half of peaks.  
 Noise Cutoff: 500 counts.  
 Reportable Ion Abundance: > 10%.

| Retention Time (MS) | MS Area | Mol. Weight or Ion |
|---------------------|---------|--------------------|
| 1.076               | 2533762 | 945.30 I           |
|                     |         | 944.90 I           |
|                     |         | 756.35 I           |

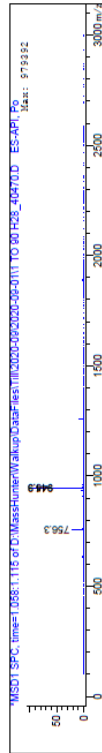

\*\*\* End of Report \*\*\*

Data File D:\MassHunter\Walkup\DataFiles\T111\2020-05\2020-05-01\1 TO 90 H2S\_40470.D  
 Sample Name: 1 TO 90 H2S

Walkup method: 'full\_range\_positive'  
 Acq. Operator : System Administrator  
 Sample Operator : Jill Orth  
 Acq. Instrument : LC-SQ  
 Injection Date : 5/1/2020 12:36:05 PM  
 Location : DIF-F9  
 Inj : 1  
 Inj Volume : 1.000 ml  
 Actual Inj Volume : 5.000 ml  
 Acq. Method : D:\Chem2\1\Methods\full\_range.M  
 Last changed : 12/2/2019 9:06:51 AM By System Administrator  
 Analysis Method : D:\Chem2\1\Methods\Water\_Rinse\_5% M  
 Last changed : 5/21/2022 2:42:22 PM By System Administrator  
 (modified after loading)  
 Method Info : Water Rinse 5%

Sample Info : Walkup method: 'full\_range\_positive'

Additional Info : Peaks manually integrated  
 D:\MSD1\_Sig254.F Report (D:\MassHunter\Walkup\DataFiles\T111\2020-05\2020-05-01\1 TO 90 H2S\_40470.D) ES-API, Pos. Scan, F

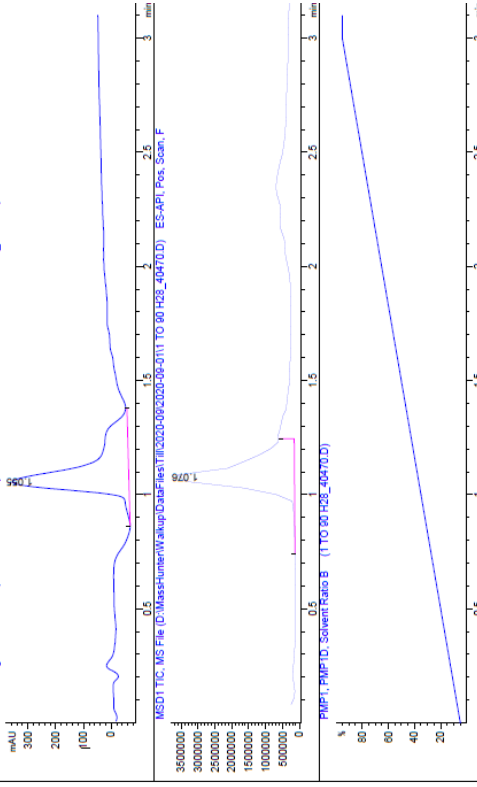

# Compound 13

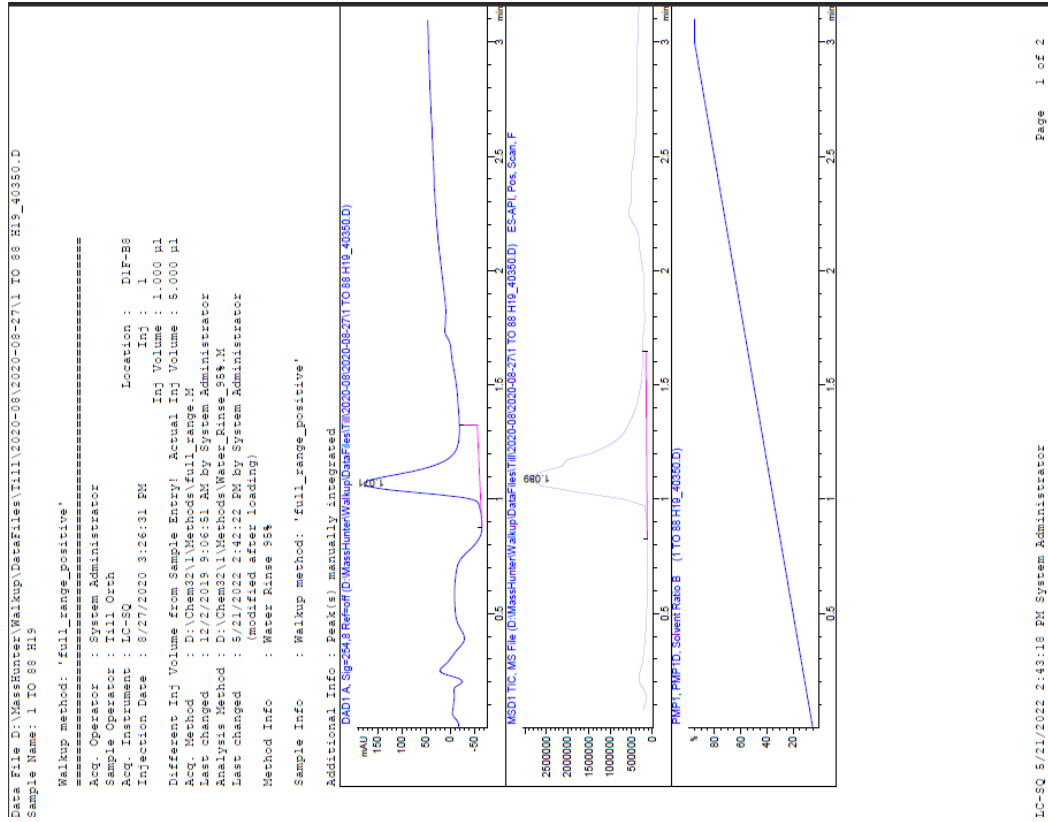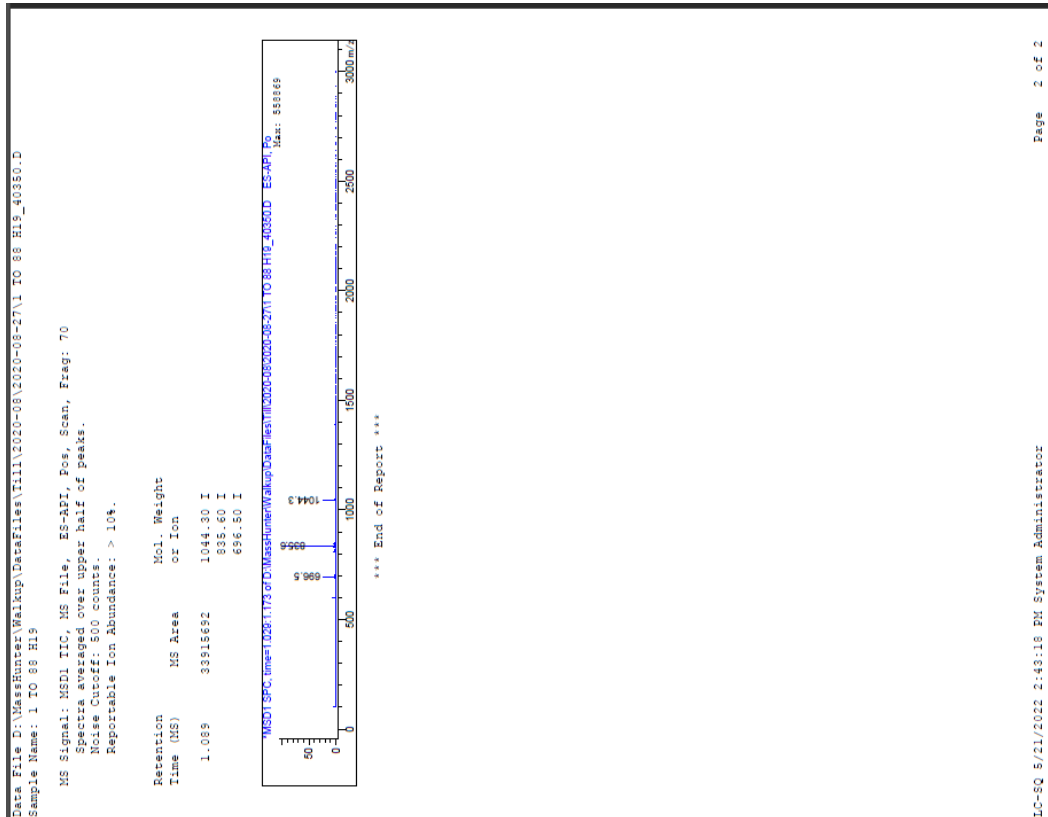

# Compound 14

Data File D:\MassHunter\Walkup\DataFiles\T111\2021-04\2021-04-07\1 TO 163 HZ\_47954.D  
 Sample Name: 1 TO 163 HZ

Walkup method: '0100-3000-new'  
 Acq. Operator : System Administrator  
 Sample Operator : Jill Orch  
 Acq. Instrument : LC-SQ  
 Injection Date : 4/7/2021 1:46:44 PM  
 Location : DIF-A7  
 Inj : 1  
 Inj Volume : 1.000 µl  
 Different Inj Volume from Sample Entry!  
 Acq. Method : D:\Chem321\Methods\100-3000-new.M  
 Last changed : 3/29/2021 1:12:45 PM By System Administrator  
 Analysis Method : D:\Chem321\Methods\Water\_Rinse\_59.M  
 Last changed : 10/29/2020 11:05:45 AM By System Administrator  
 Method Info : Water Rinse 5%

Sample Info : Walkup method: '0100-3000-new'

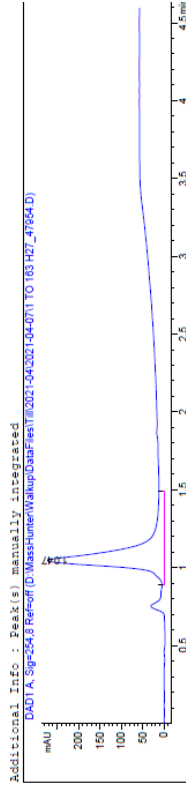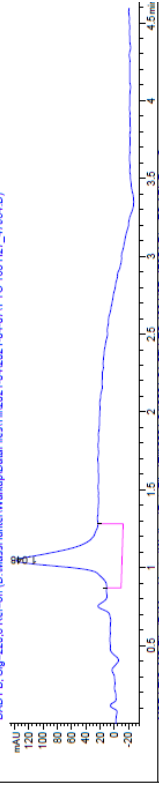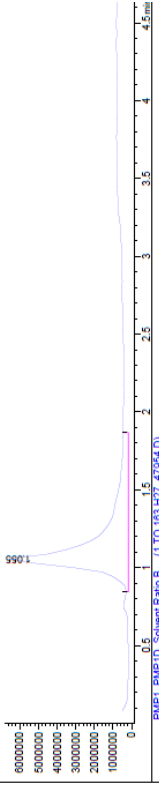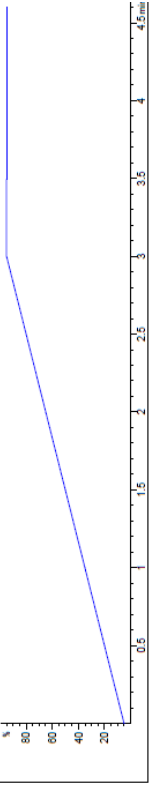

Data File D:\MassHunter\Walkup\DataFiles\T111\2021-04\2021-04-07\1 TO 163 HZ\_47954.D  
 Sample Name: 1 TO 163 HZ

MS Signal: MSD1 TIC, MS File, ES-API, Pos, Scan, Frag: 70  
 Spectra averaged over upper half of peaks.  
 Noise Cutoff: 500 counts.  
 Reportable Ion Abundance: > 10%.

| Retention Time (MS) | MS Area  | Mol. Weight or Ion |
|---------------------|----------|--------------------|
| 1.065               | 76162104 | 1413.16 I          |
|                     |          | 1412.70 I          |
|                     |          | 542.65 I           |
|                     |          | 542.05 I           |
|                     |          | 503.55 I           |
|                     |          | 706.90 I           |

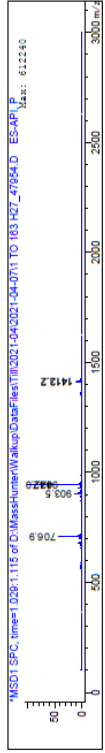

\*\*\* End of Report \*\*\*



# Compound 15

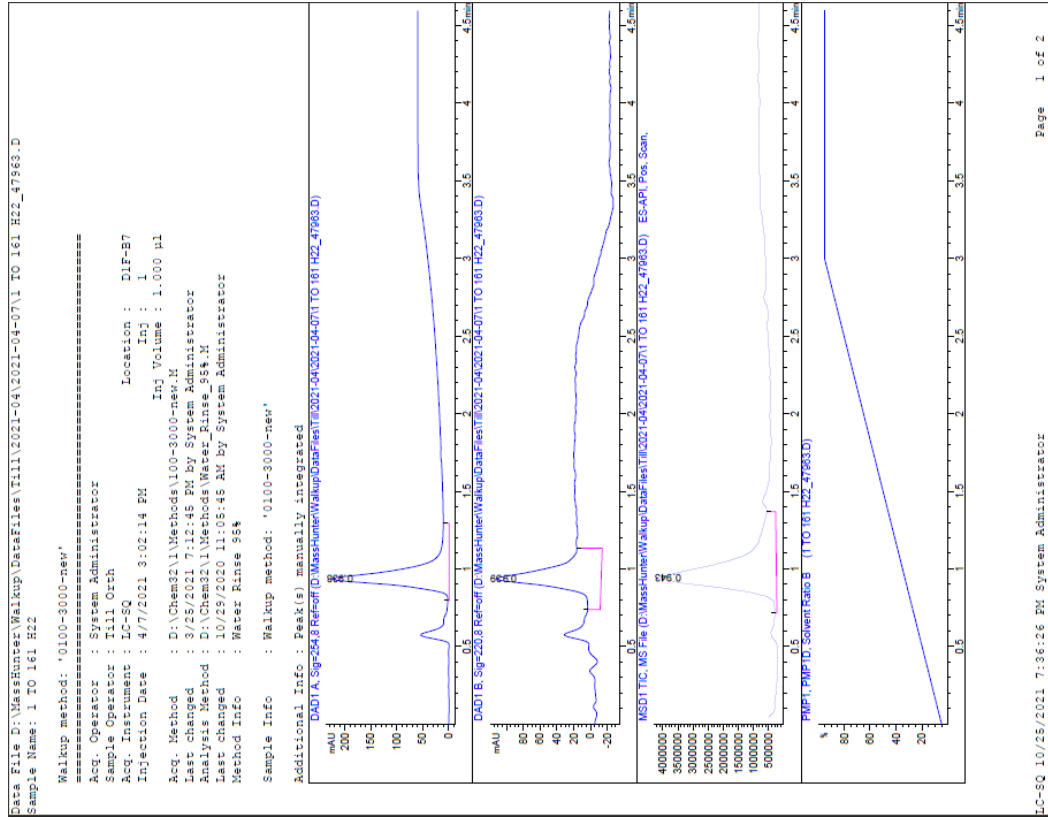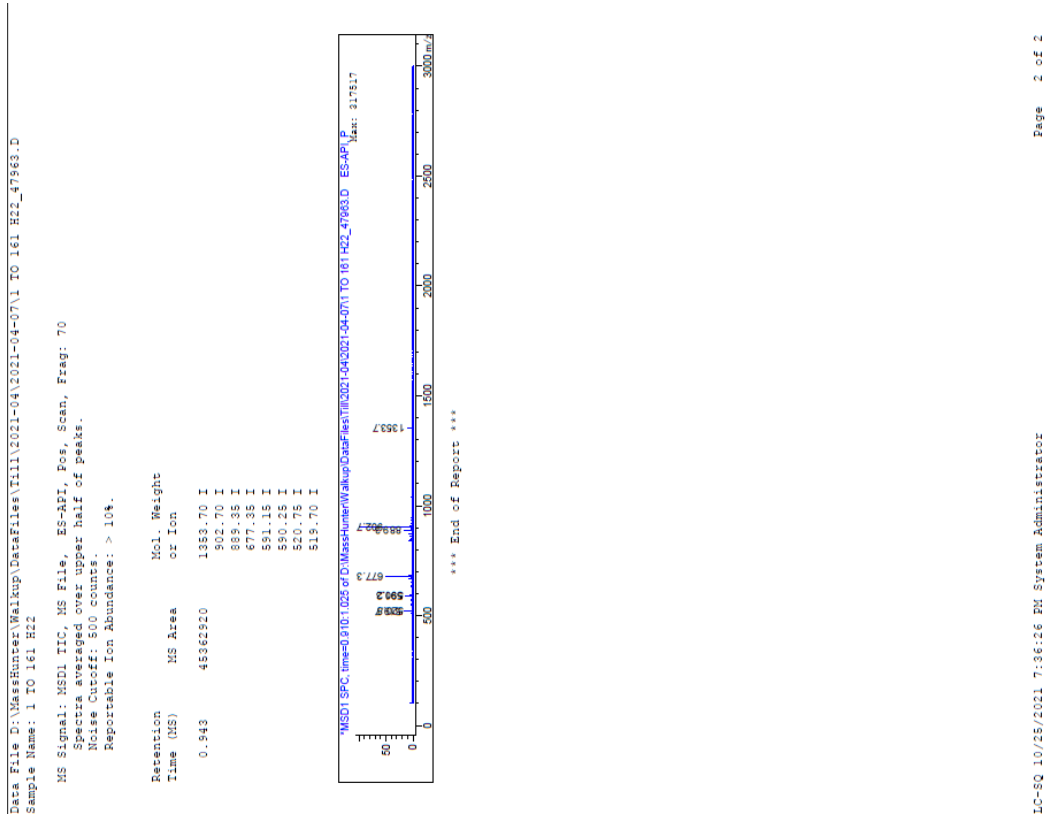

# Compound 16

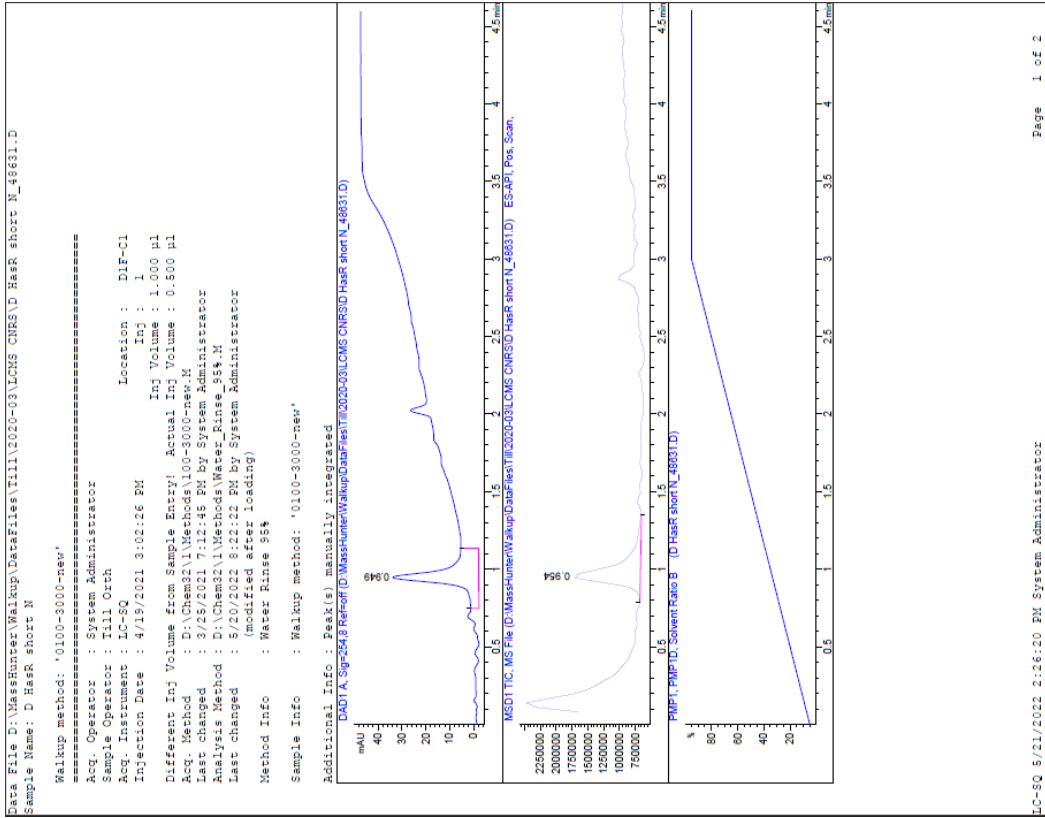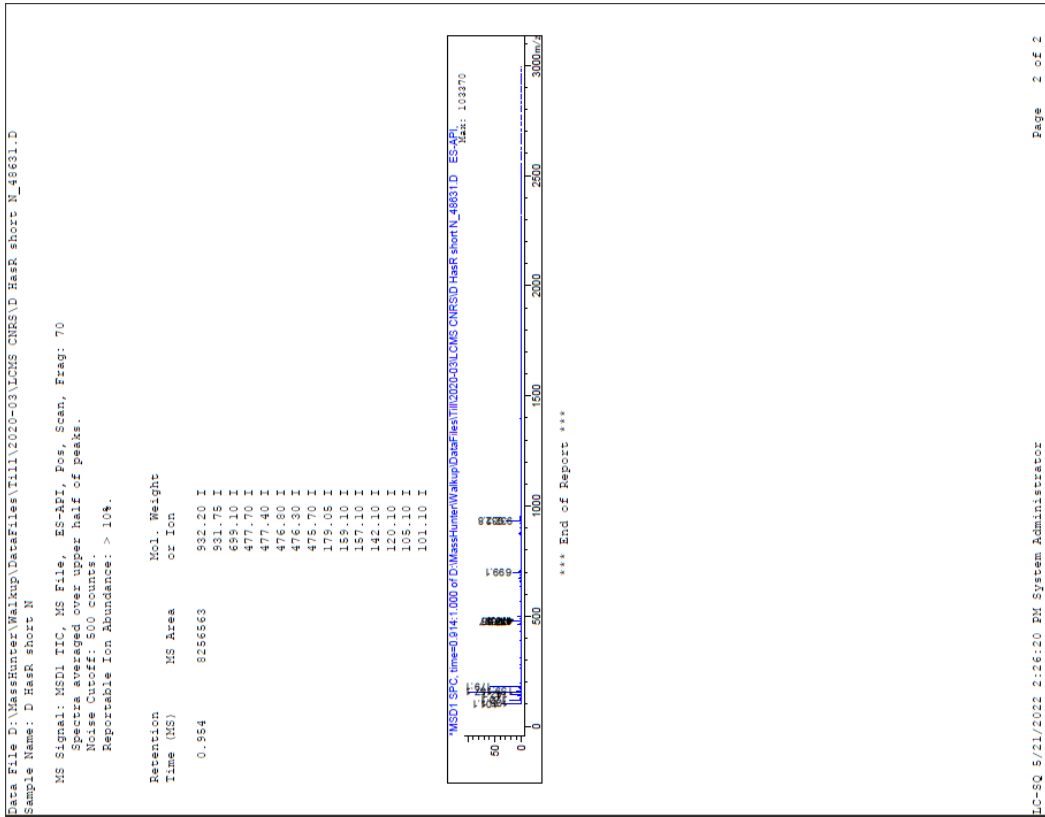

# Compound 17

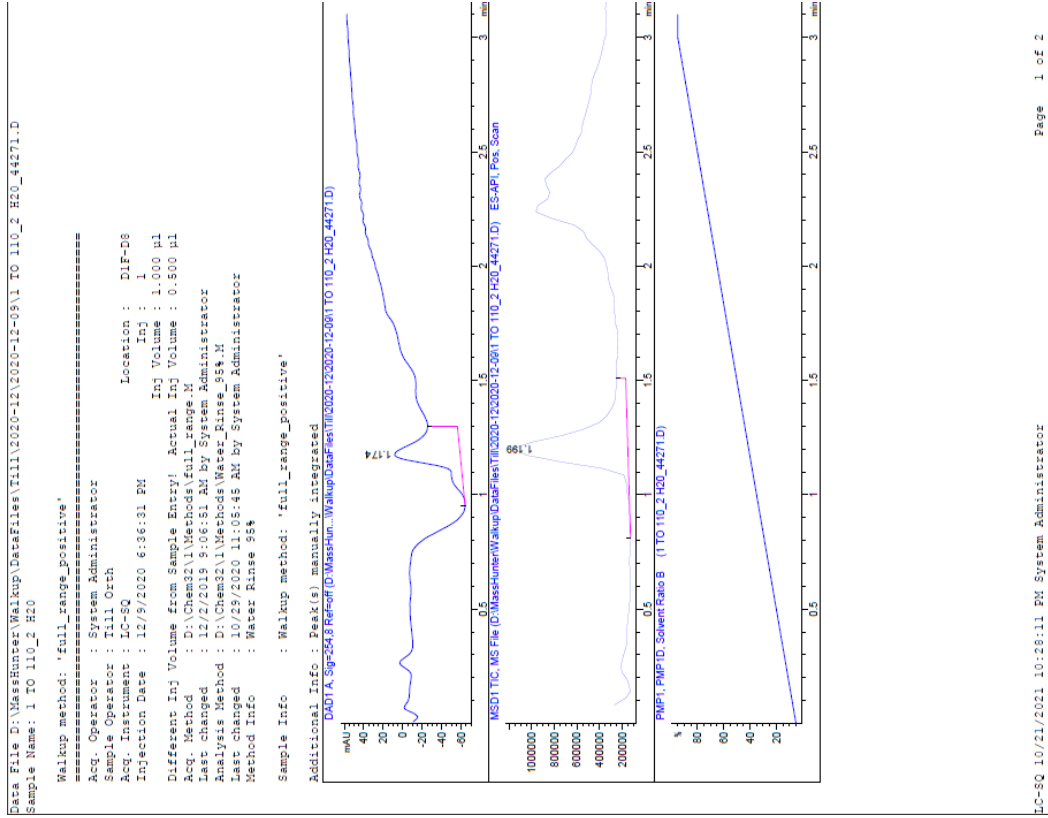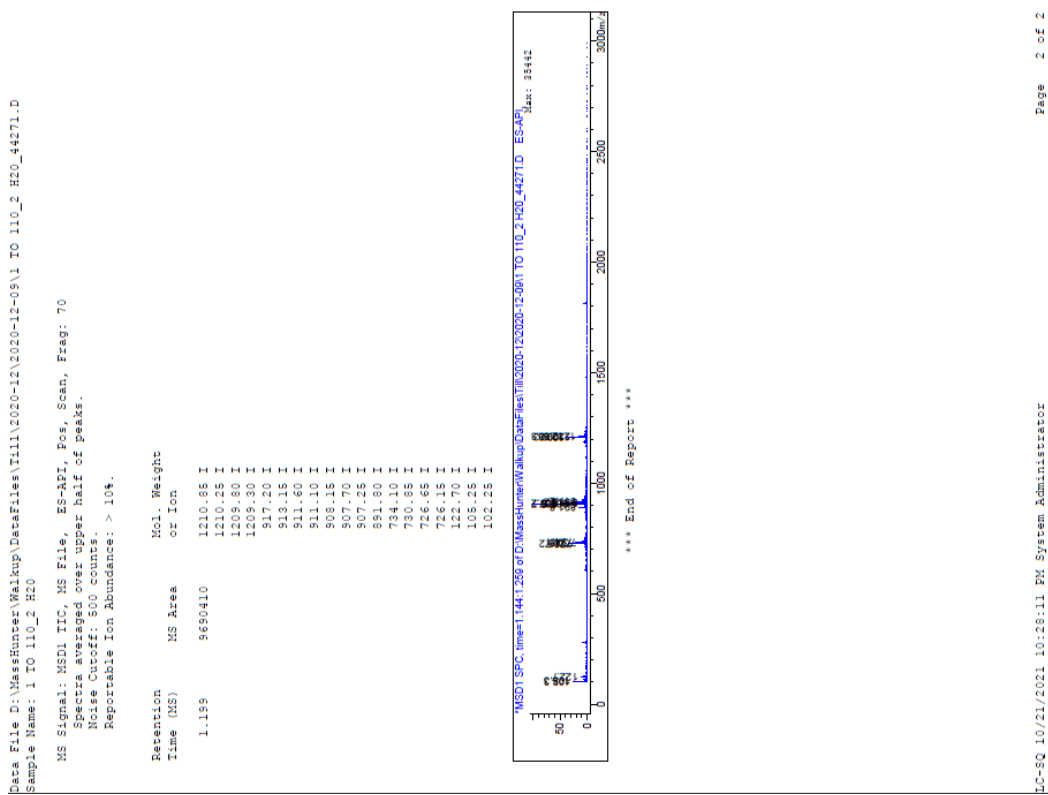

Compound 18

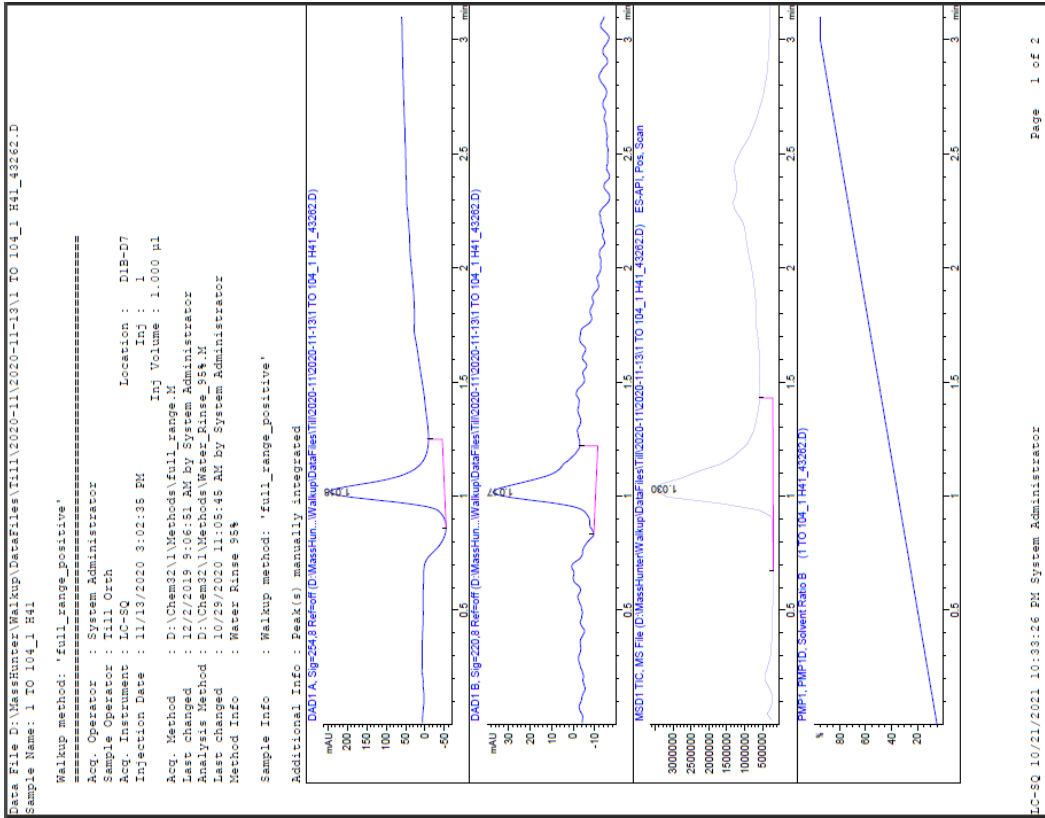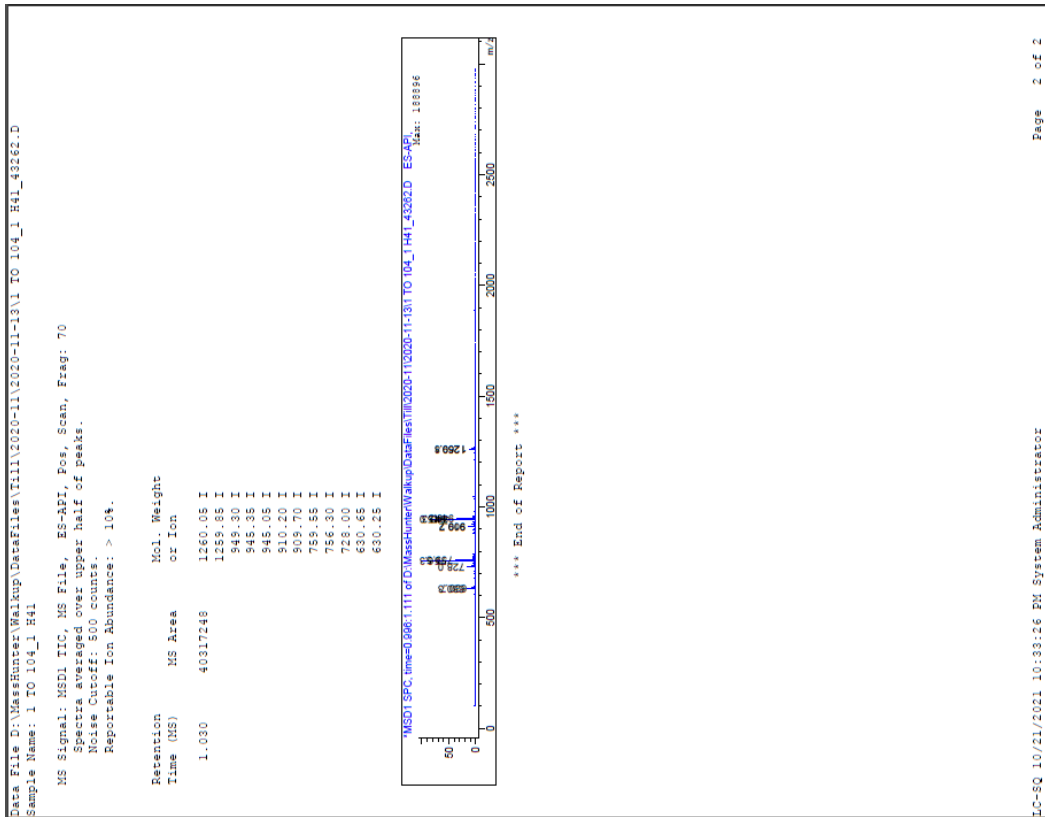

# Compound 19

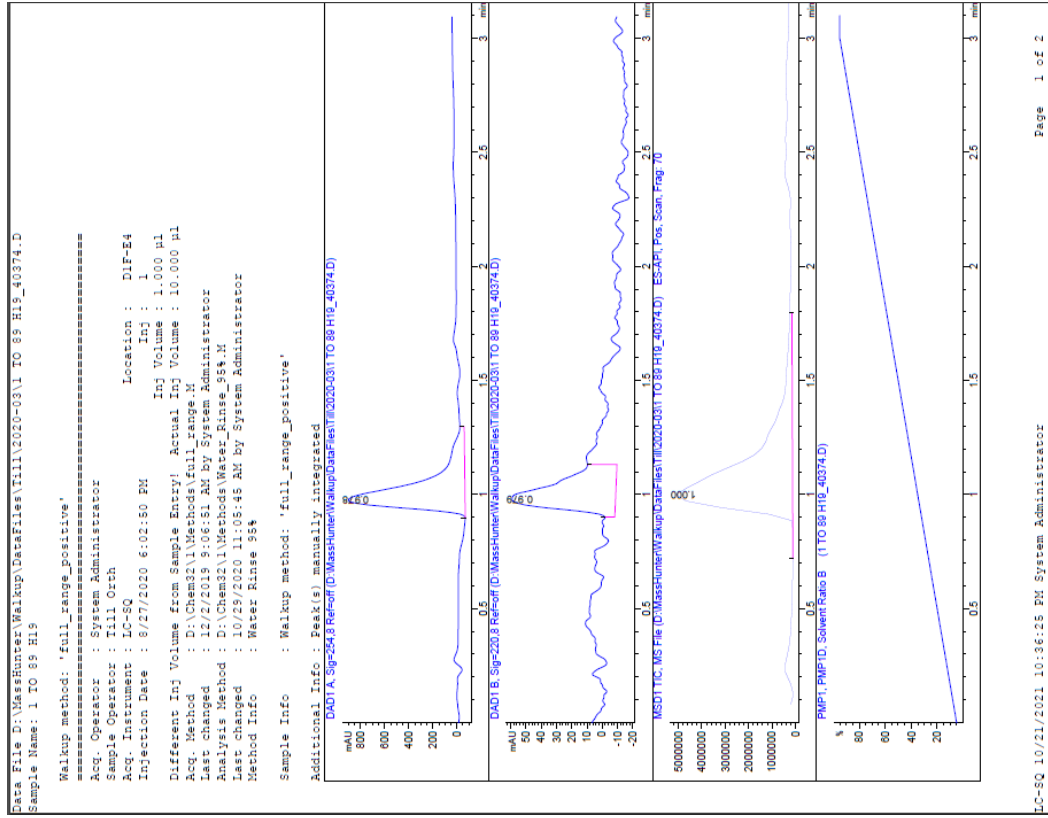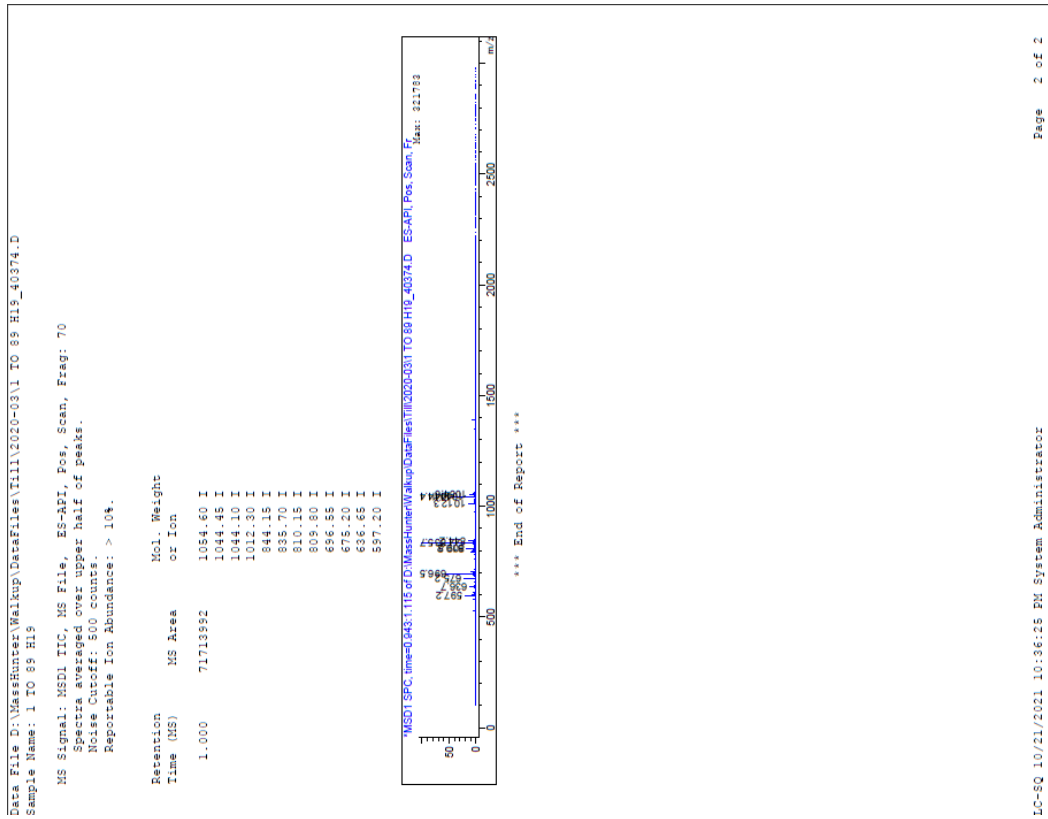

# Compound 20

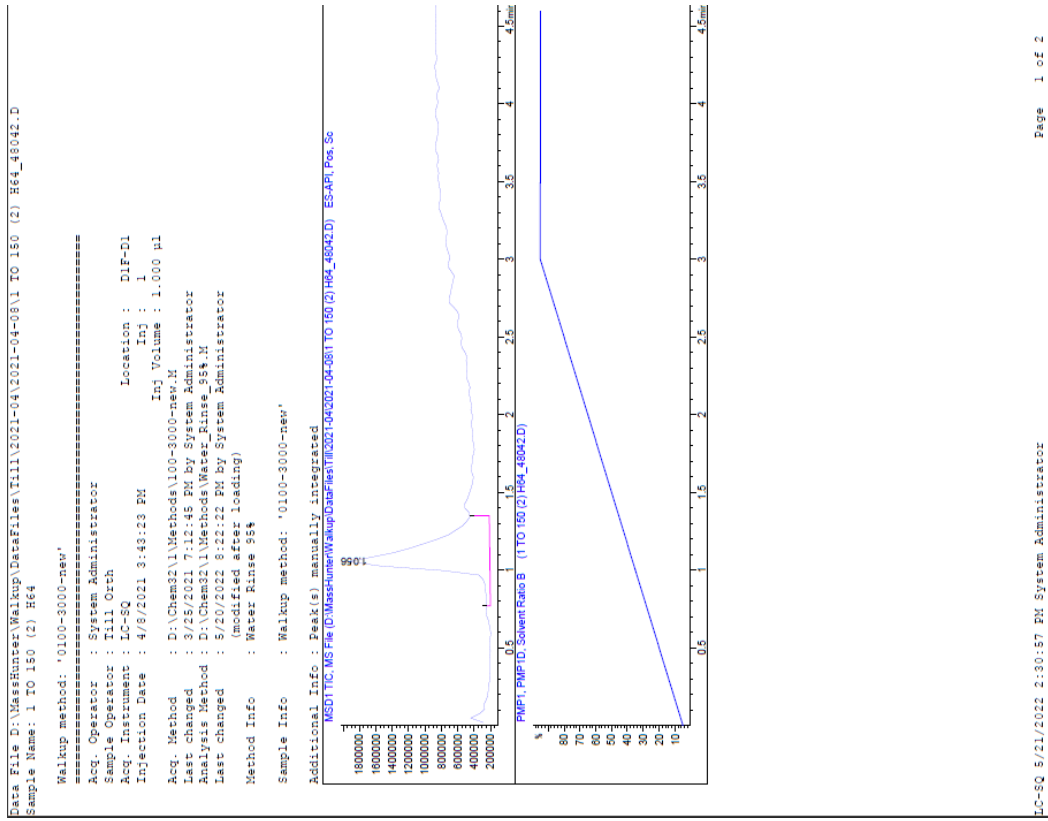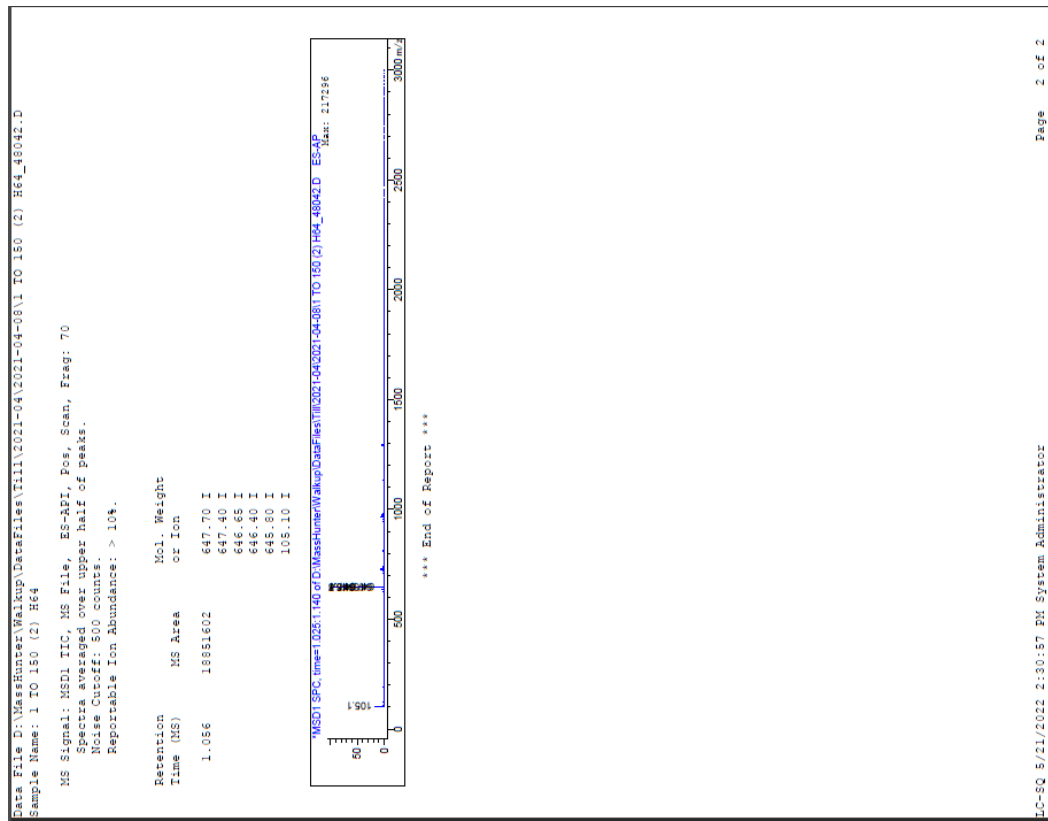

# Compound 21

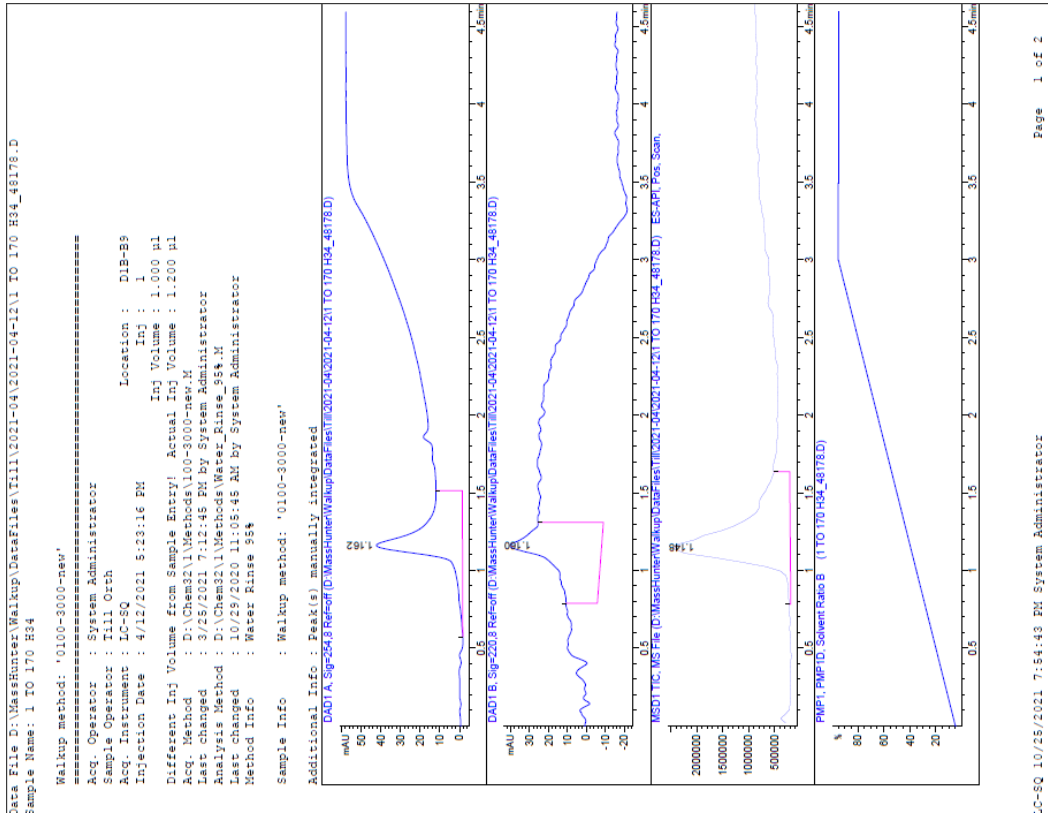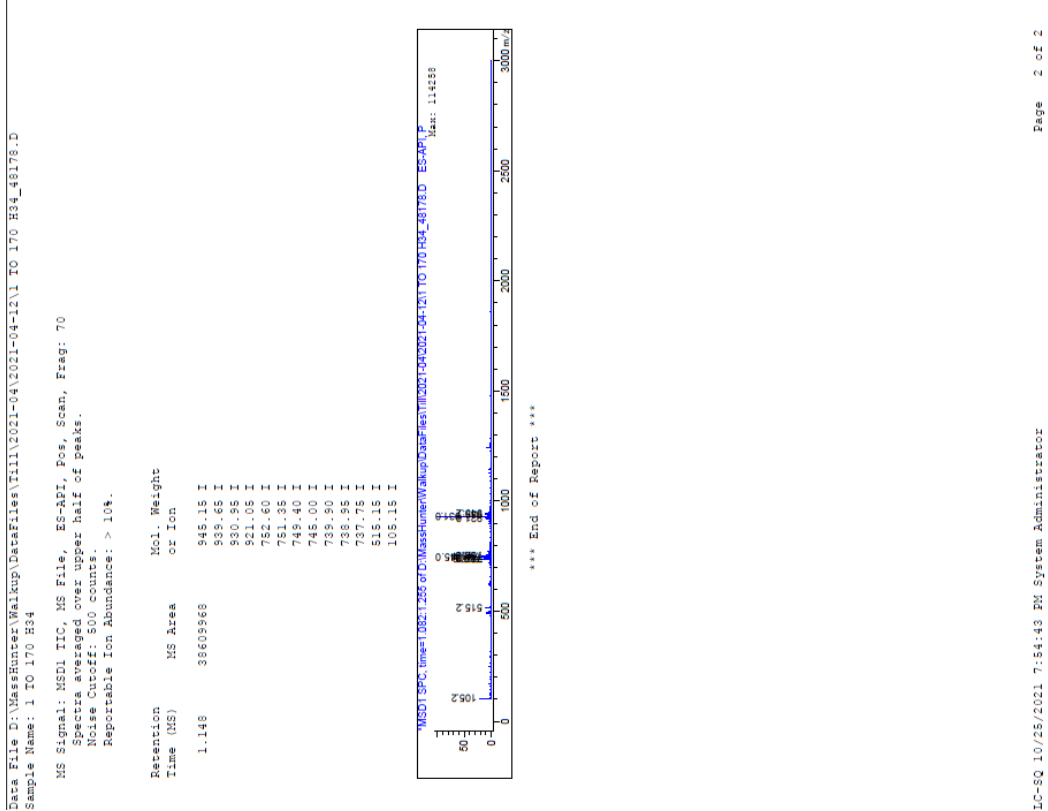

# Compound 22

Data File D:\MassHunter\Walkup\DataFiles\Till\2020-09\2020-09-14\1 TO 94 H88\_41759.D  
 Sample Name: 1 TO 94 H88

MS Signal: MSD1 TIC, MS File, ES-API, Pos. Scan, Frag: 70  
 Spectra averaged over upper half of peaks.  
 Noise Cutoff: 500 counts.  
 Reportable Ion Abundance: > 10%.

| Retention Time (MS) | MS Area | Mol. Weight or Ion |
|---------------------|---------|--------------------|
| 1.265               | 1066977 | 1686.00 I          |
|                     |         | 1685.60 I          |
|                     |         | 1099.00 I          |
|                     |         | 1090.76 I          |

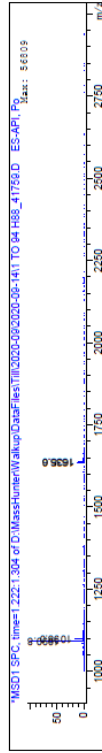

\*\*\* End of Report \*\*\*

Data File D:\MassHunter\Walkup\DataFiles\Till\2020-09\2020-09-14\1 TO 94 H88\_41759.D  
 Sample Name: 1 TO 94 H88

Walkup method: '1000\_3000\_Positive'  
 =====  
 Acq. Operator : System Administrator  
 Sample Operator : Till Orth  
 Acq. Instrument : LC-SQ  
 Injection Date : 9/14/2020 11:22:41 AM  
 Location : DIP-A4  
 Inj : 1  
 Inj Volume : 1.000 µl  
 Different Inj Volume from Sample Entry! Actual Inj Volume : 0.500 µl  
 Acq. Method : D:\Chem2\1\Methods\1000\_3000.M  
 Last changed : 12/27/2019 9:06:09 AM By System Administrator  
 Analysis Method : D:\Chem2\1\Methods\Water\_Rinse\_98%.M  
 Last changed : 10/29/2020 11:08:45 AM By System Administrator  
 Method Info : Water Rinse 98%

Sample Info : Walkup method: '1000\_3000\_Positive'

Additional Info : Peak(s) manually integrated  
 D:\MSD1\_SPC\1.2221.1304 of D:\MassHunter\Walkup\DataFiles\Till\2020-09\2020-09-14\1 TO 94 H88\_41759.D

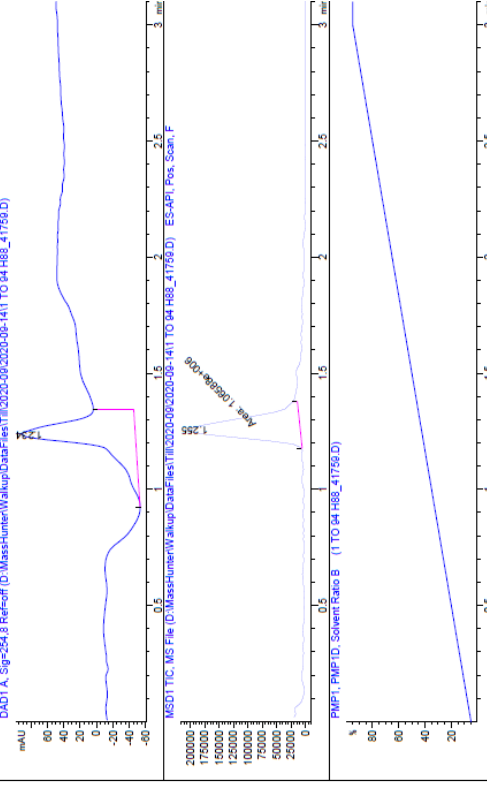



Compound 23

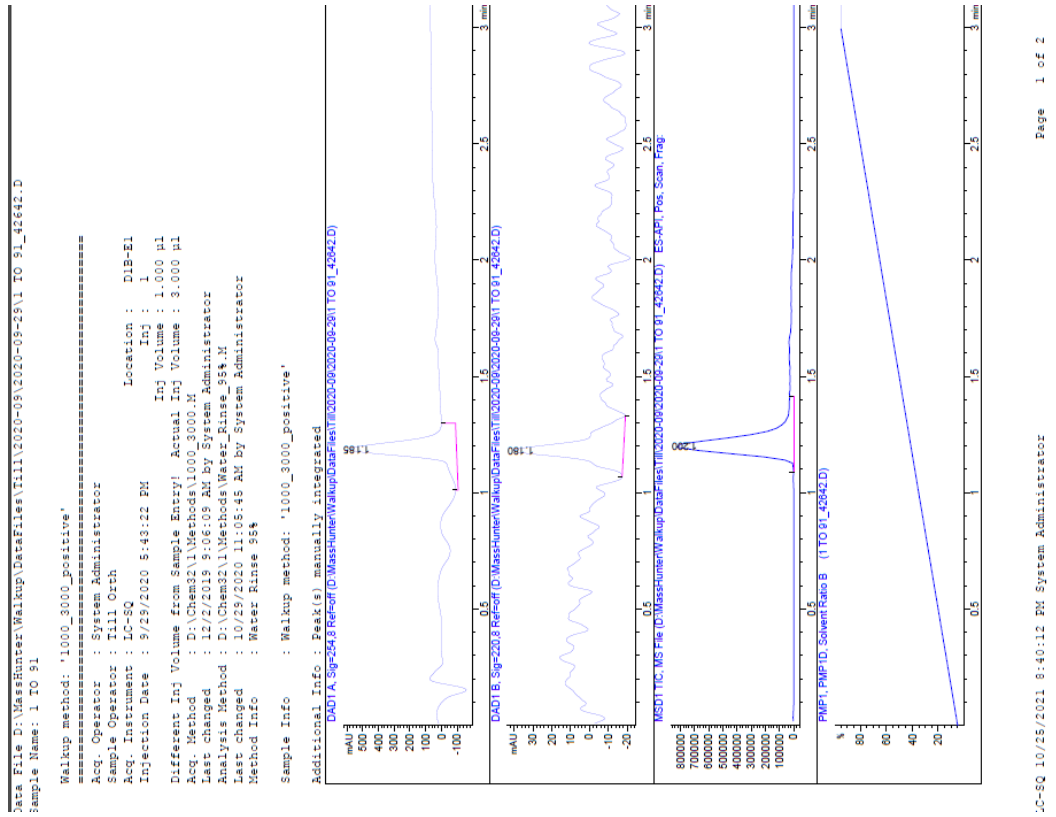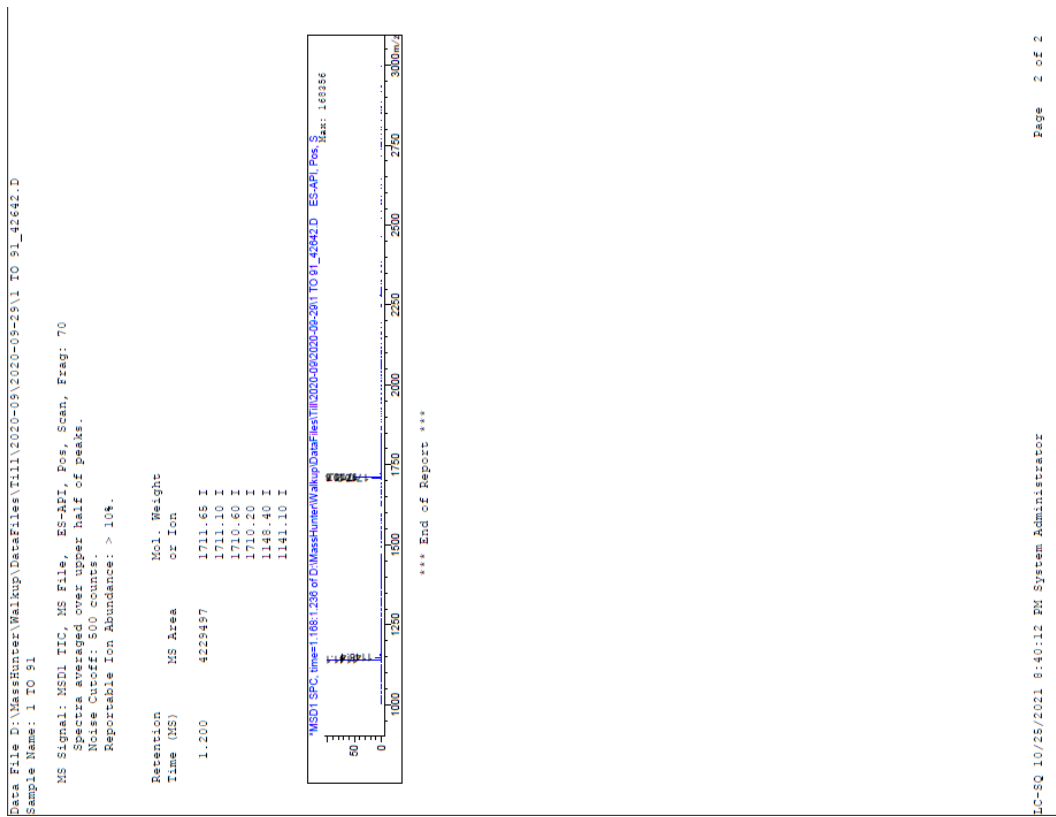

Compound 24

Data File D:\MassHunter\Walkup\DataFiles\Till\2020-09\2020-09-03\1 TO 92 H67\_40596.D  
 Sample Name: 1 TO 92 H67

Walkup method: 'full\_range\_positive'  
 =====  
 Acq. Operator : System Administrator  
 Sample Operator : Till Orth  
 Acq. Instrument : LC-SQ  
 Injection Date : 9/3/2020 2:54:51 PM Location : DIB-C4  
 Inj Volume : 1.000 µl Inj : 1  
 Different Inj Volume from Sample Entry! Actual Inj Volume: 3.000 µl  
 Acq. Method : D:\Chem321\Methods\full\_range.M  
 Last changed : 12/2/2019 9:06:51 AM By System Administrator  
 Analysis Method : D:\Chem321\Methods\Water\_Rinse\_98.M  
 Last changed : 10/29/2020 11:08:45 AM By System Administrator  
 Method Info : Water Rinse 98%

Sample Info : Walkup method: 'full\_range\_positive'

Additional Info : Peak(s) manually integrated  
 DAD1.A, Sig=254.8 Refcorf (D:\MassHunter\Walkup\DataFiles\Till\2020-09\2020-09-03\1 TO 92 H67\_40596.D)

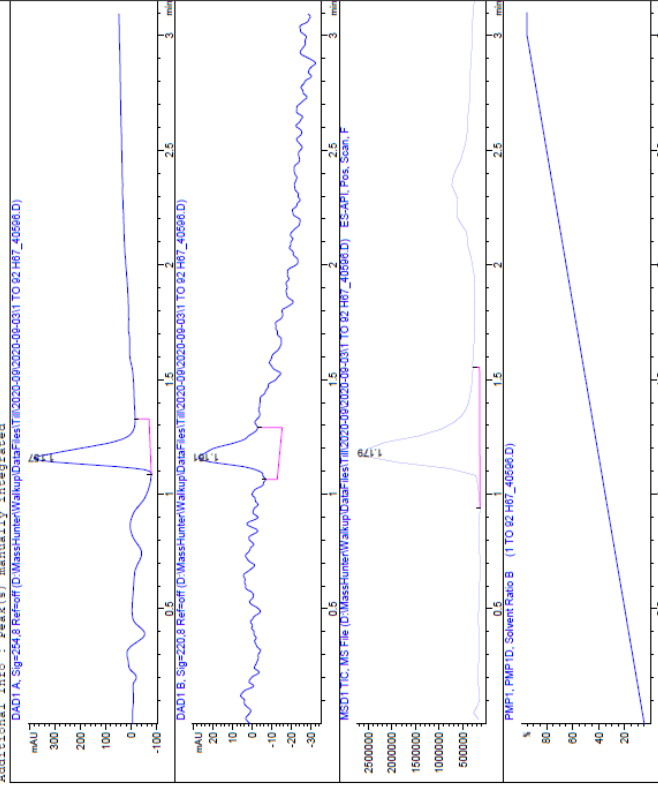

Data File D:\MassHunter\Walkup\DataFiles\Till\2020-09\2020-09-03\1 TO 92 H67\_40596.D  
 Sample Name: 1 TO 92 H67

MS Signal: MSD1 TIC, MS File, ES-API, Pos, Scan, Frag: 70  
 Spectra averaged over upper half of peaks.  
 Noise Cutoff: 800 counts.  
 Reportable Ion Abundance: > 10%.

| Retention Time (MS) | MS Area  | Mol. Weight or Ion |
|---------------------|----------|--------------------|
| 1.179               | 53892568 | 1273.20 I          |
|                     |          | 985.18 I           |
|                     |          | 771.85 I           |
|                     |          | 764.40 I           |

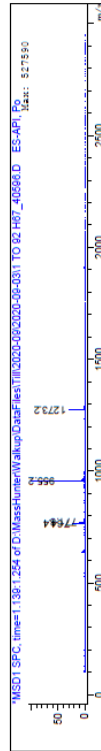

\*\*\* End of Report \*\*\*

# Compound 25

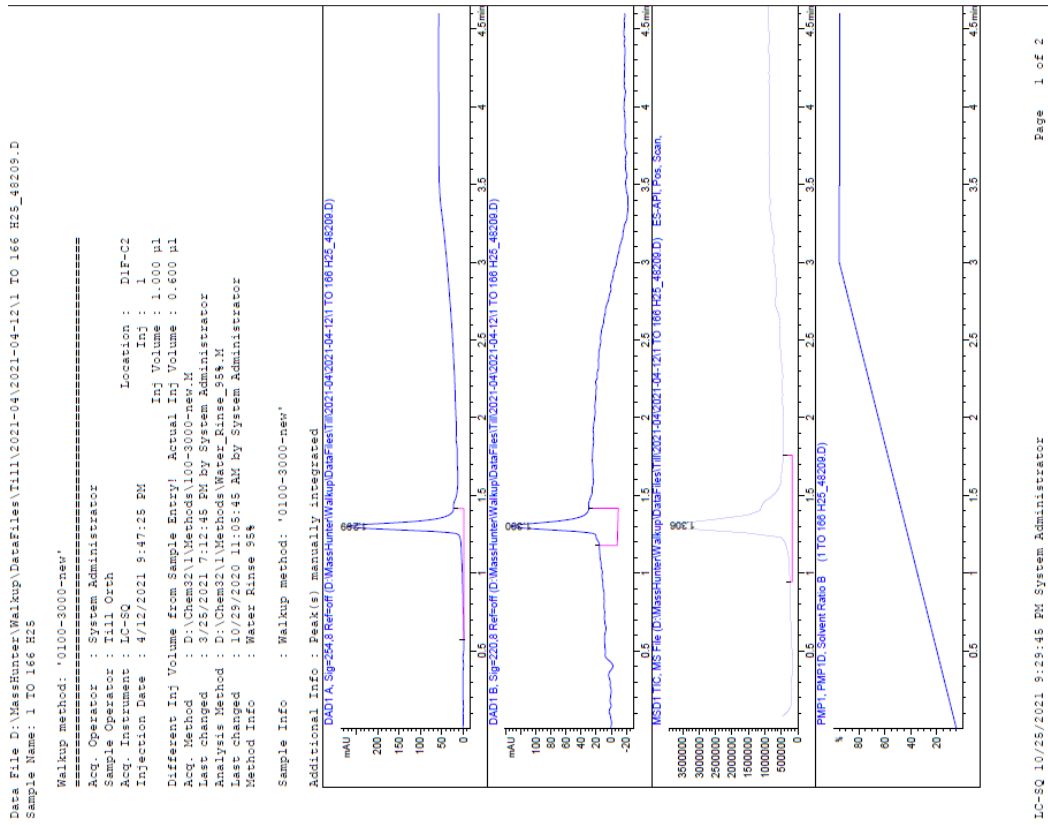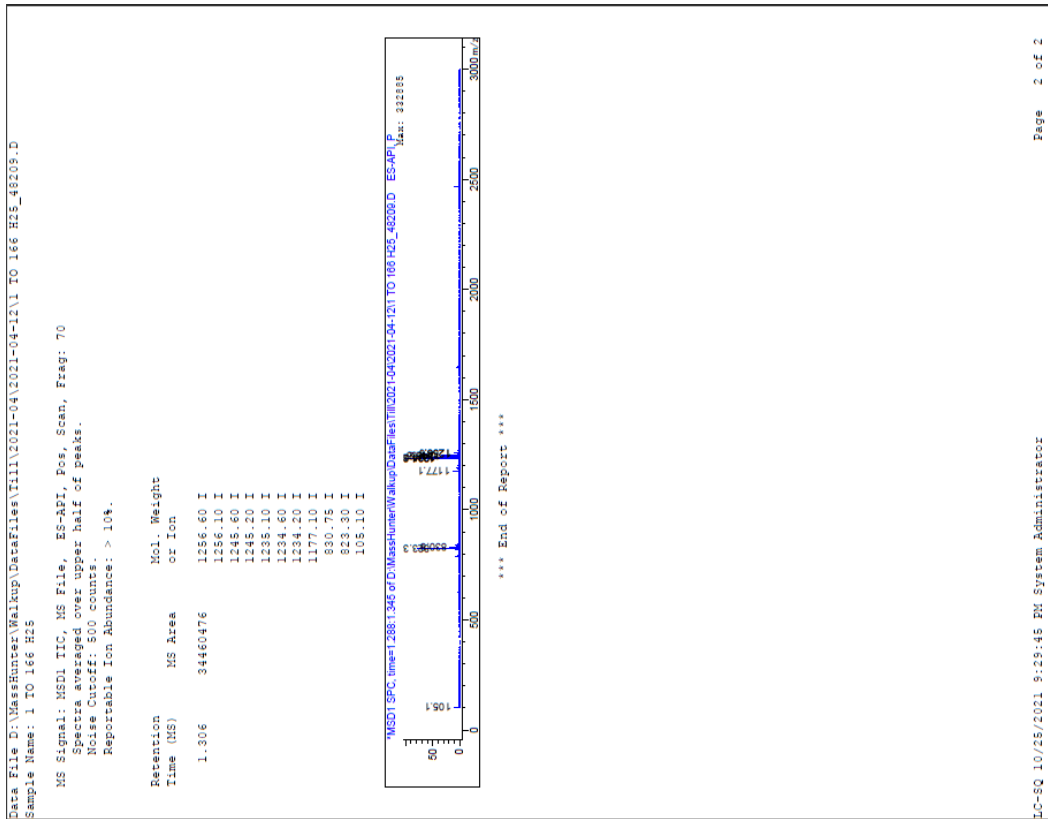

# Compound 26

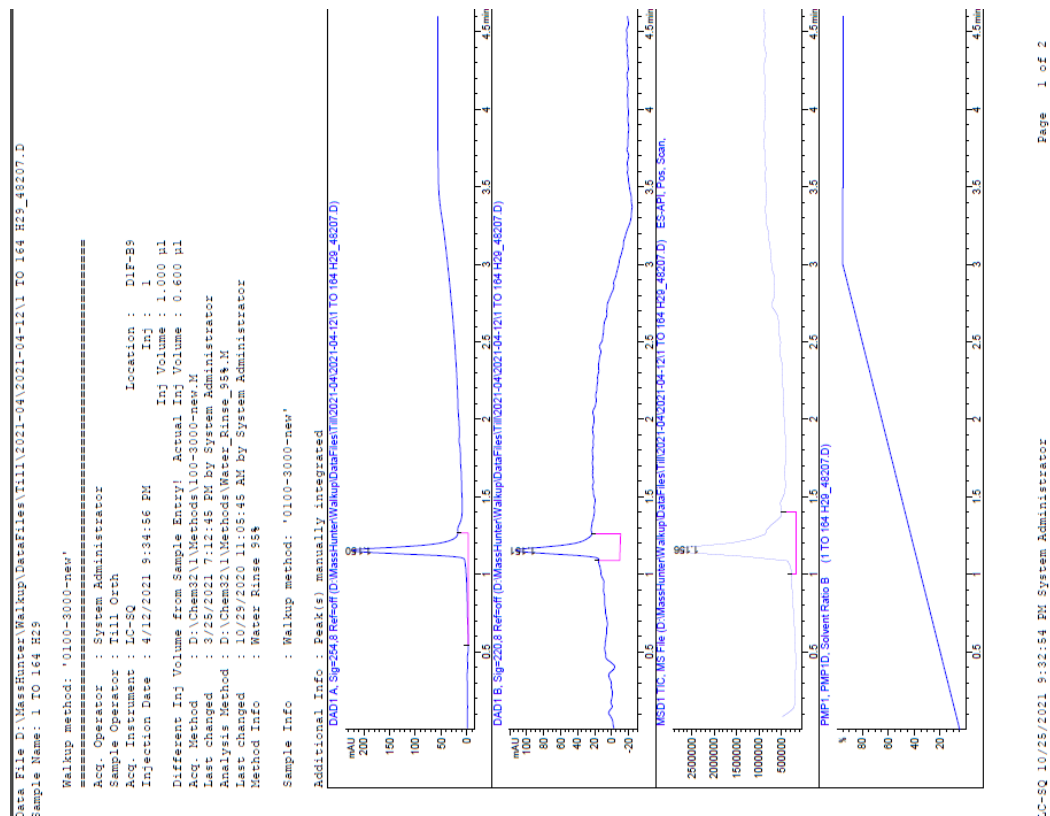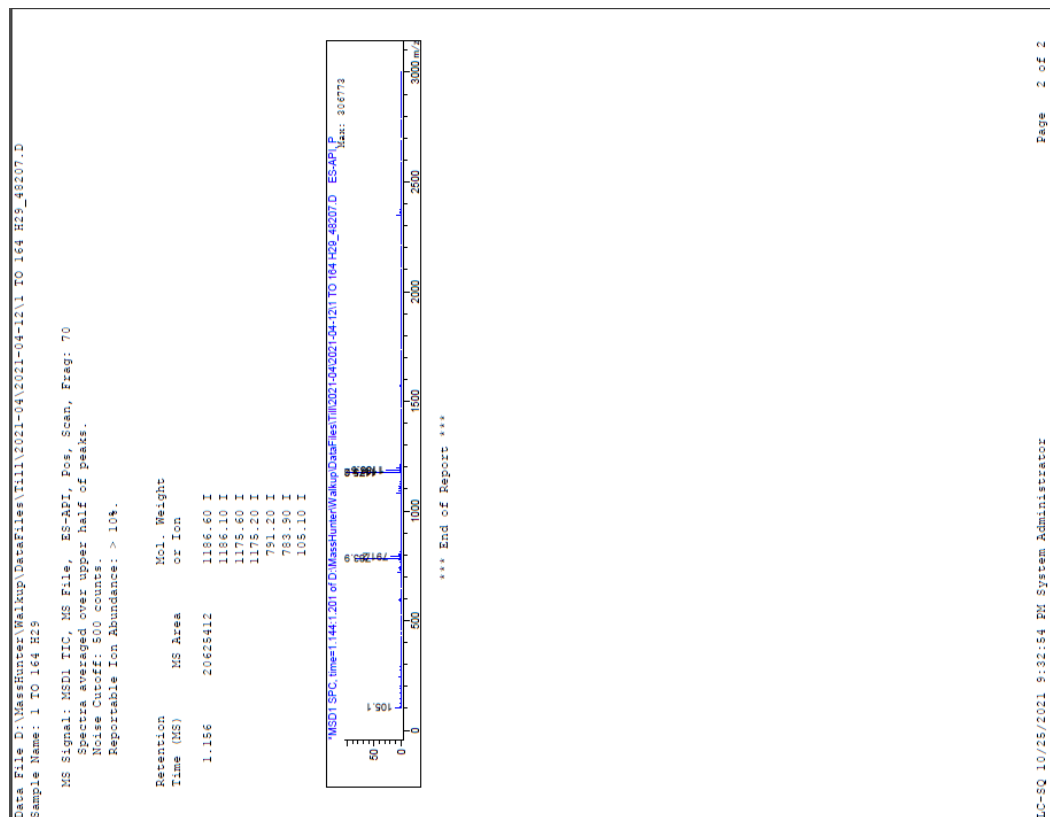

# Compound 27

Data File D:\MassHunter\Walkup\DataFiles\Till\2021-03\2021-03-31\1 TO 165 H33\_47769.D  
 Sample Name: 1 TO 165 H33

Walkup method: '0100-3000-new'  
 Acq. Operator : System Administrator  
 Sample Operator : Till Orth  
 Acq. Instrument : LC-SQ  
 Injection Date : 3/31/2021 7:44:42 PM  
 Location : DIF-D6  
 Inj : 1  
 Inj Volume : 1.000 µl  
 Different Inj Volume from Sample Entry! Actual Inj Volume : 3.000 µl  
 Acq. Method : D:\Chem321\Methods\100-3000-new.M  
 Last changed : 3/25/2021 7:12:45 PM by System Administrator  
 Analysis Method : D:\Chem321\Methods\Water\_Rinse\_95%.M  
 Last changed : 10/29/2020 11:05:45 AM by System Administrator  
 Method Info : Water Rinse 95%

Sample Info : Walkup method: '0100-3000-new'

Additional Info : Peak(s) manually integrated

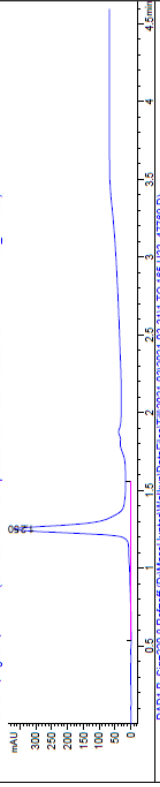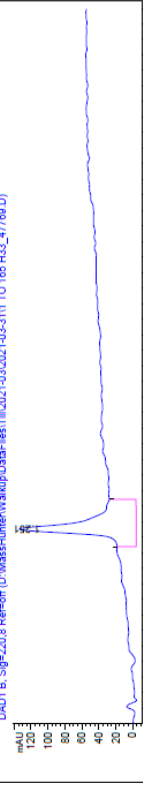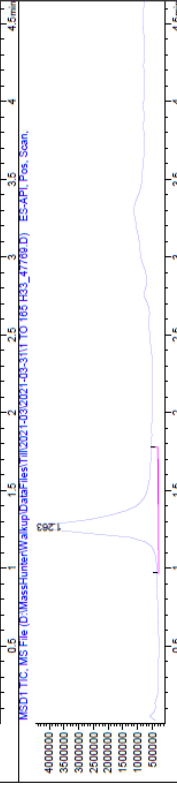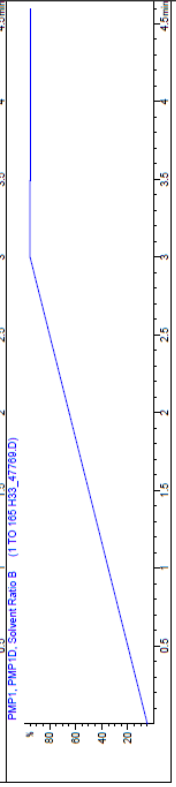

Data File D:\MassHunter\Walkup\DataFiles\Till\2021-03\2021-03-31\1 TO 165 H33\_47769.D  
 Sample Name: 1 TO 165 H33

MS Signal: MSD1 TIC, MS File, ES-AP1, Pos, Scan, Frag: 70  
 Spectra averaged over upper half of peaks.  
 Noise Cutoff: 500 counts.  
 Reportable Ion Abundance: > 10%.

| Retention Time (MS) | MS Area  | Mol. Weight or Ion |
|---------------------|----------|--------------------|
| 1.263               | 38051636 | 2437.40 I          |
|                     |          | 1230.60 I          |
|                     |          | 1230.10 I          |
|                     |          | 1229.60 I          |
|                     |          | 1219.85 I          |
|                     |          | 1219.10 I          |
|                     |          | 1218.70 I          |
|                     |          | 820.25 I           |
|                     |          | 813.00 I           |

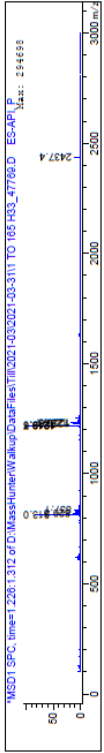

\*\*\* End of Report \*\*\*

# Compound 28

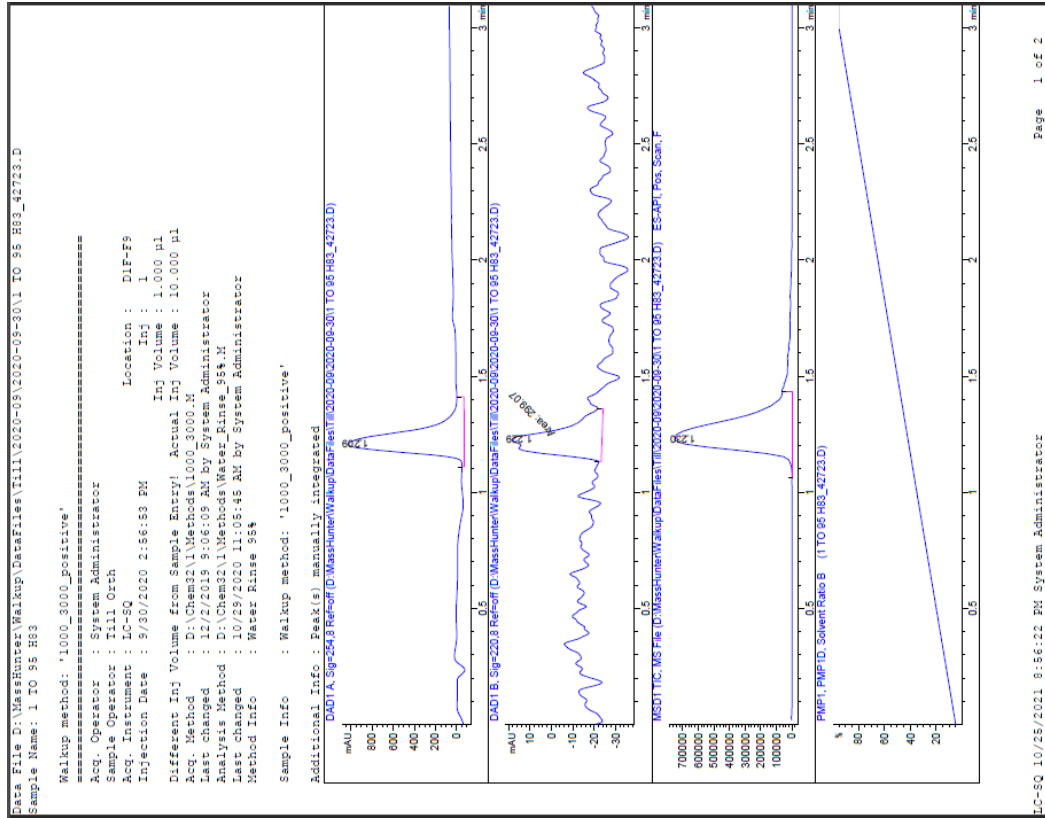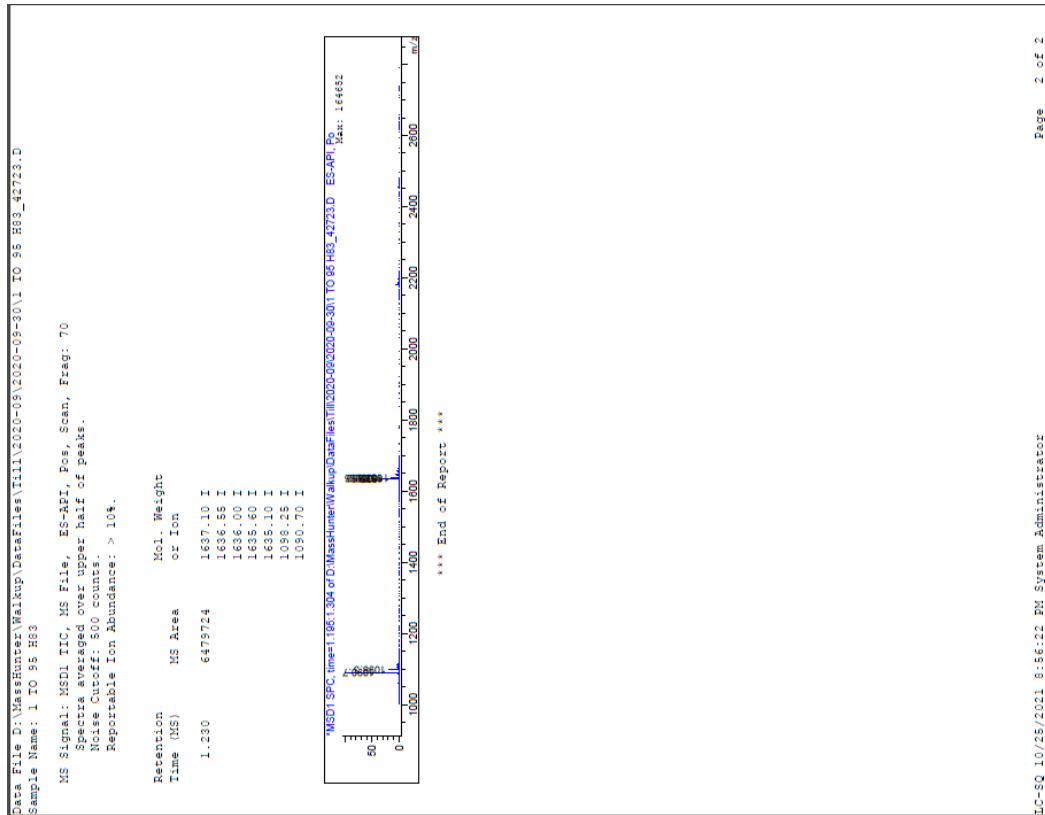

Compound 29

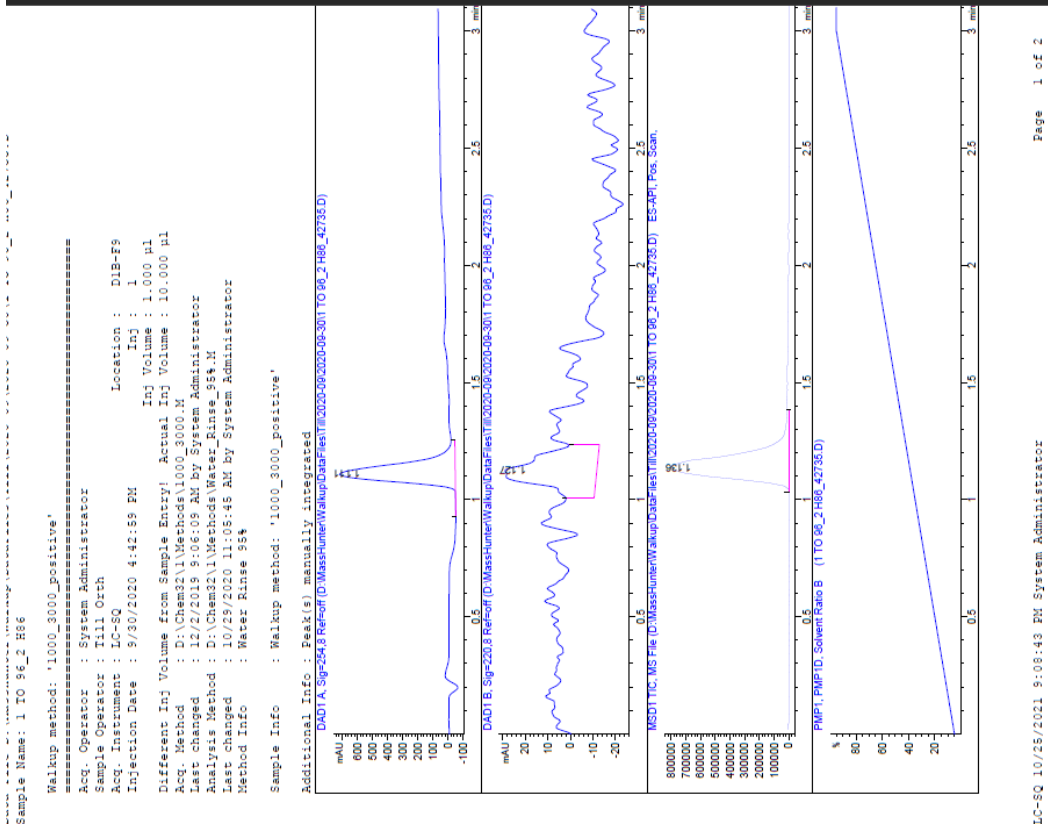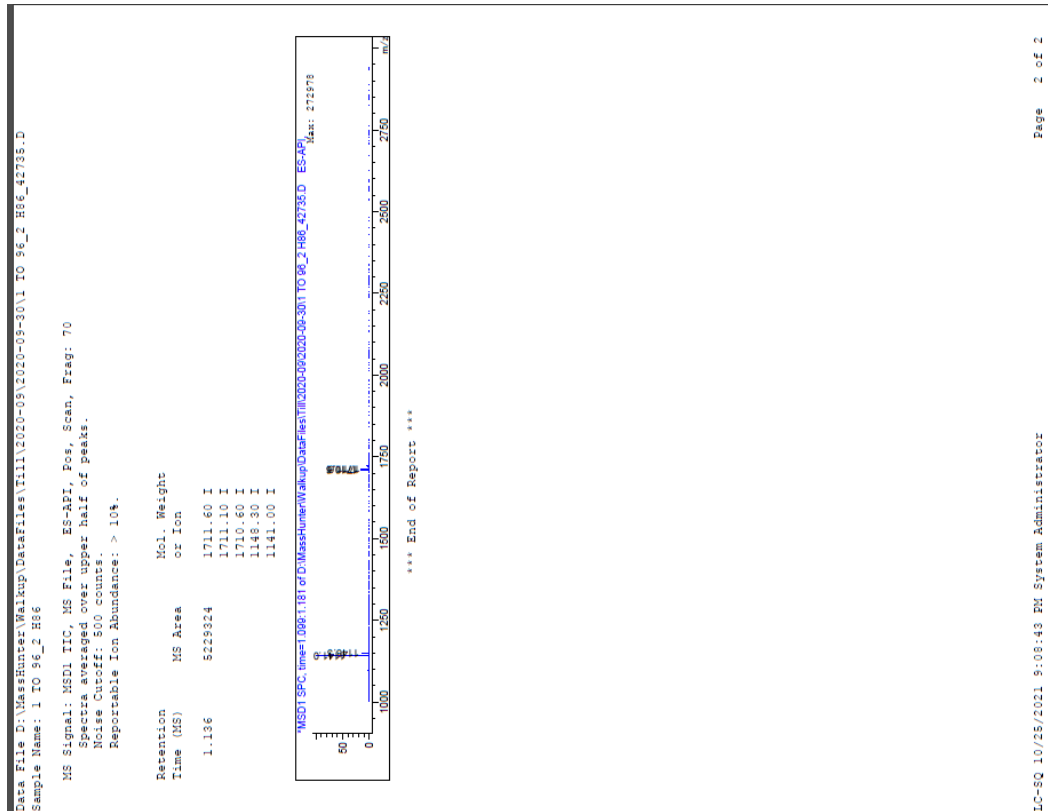

# Compound 30

Data File D:\MassHunter\Walkup\DataFiles\T111\2020-09\2020-09-03\1 TO 93 H66\_40617.D  
 Sample Name: 1 TO 93 H66

Walkup method: 'full\_range\_positive'  
 =====  
 Acq. Operator : System Administrator  
 Sample Operator : Tili Orth  
 Acq. Instrument : LC-SQ  
 Injection Date : 9/3/2020 4:54:18 PM  
 Location : D1B-E4  
 Inj : 1  
 Inj Volume : 1.000 µl  
 Different Inj Volume from Sample Entry! Actual Inj Volume : 6.000 µl  
 Acq. Method : D:\Chem2\1\Methods\full\_range.M  
 Last changed : 12/2/2018 9:06:51 AM By System Administrator  
 Analysis Method : D:\Chem2\1\Methods\Water\_Rinse\_98.M  
 Last changed : 10/29/2020 11:06:45 AM By System Administrator  
 Method Info : Water Rinse 98%

Sample Info : Walkup method: 'full\_range\_positive'

Additional Info : Peak(s) manually integrated  
 DAD1A\_Sig=254.8 Ref=off (D:\MassHunter\Walkup\DataFiles\T111\2020-09\2020-09-03\1 TO 93 H66\_40617.D)

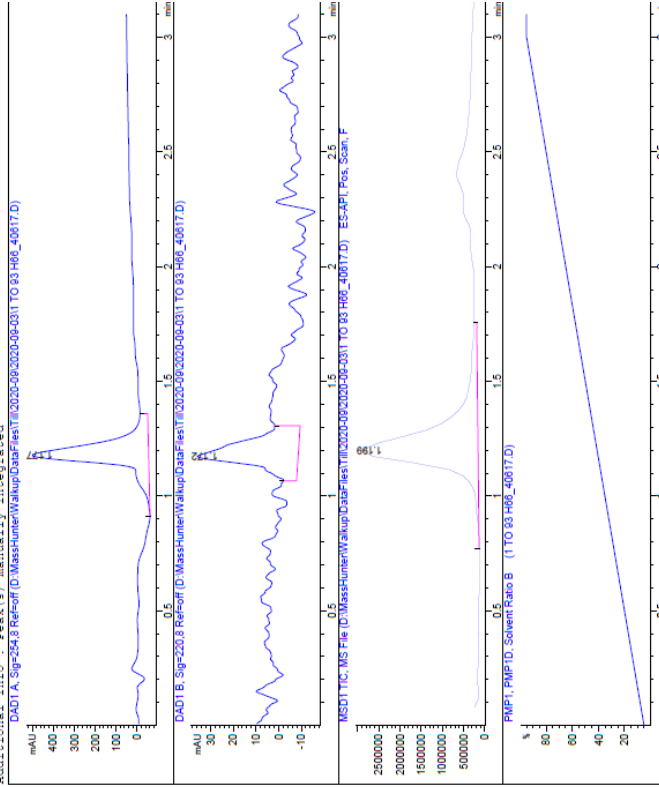

Data File D:\MassHunter\Walkup\DataFiles\T111\2020-09\2020-09-03\1 TO 93 H66\_40617.D  
 Sample Name: 1 TO 93 H66

MS Signal: MSD1 TIC, MS File, ES-API, Pos, Scan, Frag: 70  
 Spectra averaged over upper half of peaks.  
 Noise Cutoff: 500 counts.  
 Reportable Ion Abundance: > 10%.

| Retention Time (MS) | MS Area  | Mol. Weight | or Ion |
|---------------------|----------|-------------|--------|
| 1.139               | 30348488 | 1273.15     | I      |
|                     |          | 555.15      | I      |
|                     |          | 771.95      | I      |
|                     |          | 764.30      | I      |

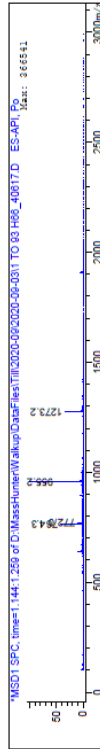

\*\*\* End of Report \*\*\*



# Compound 31

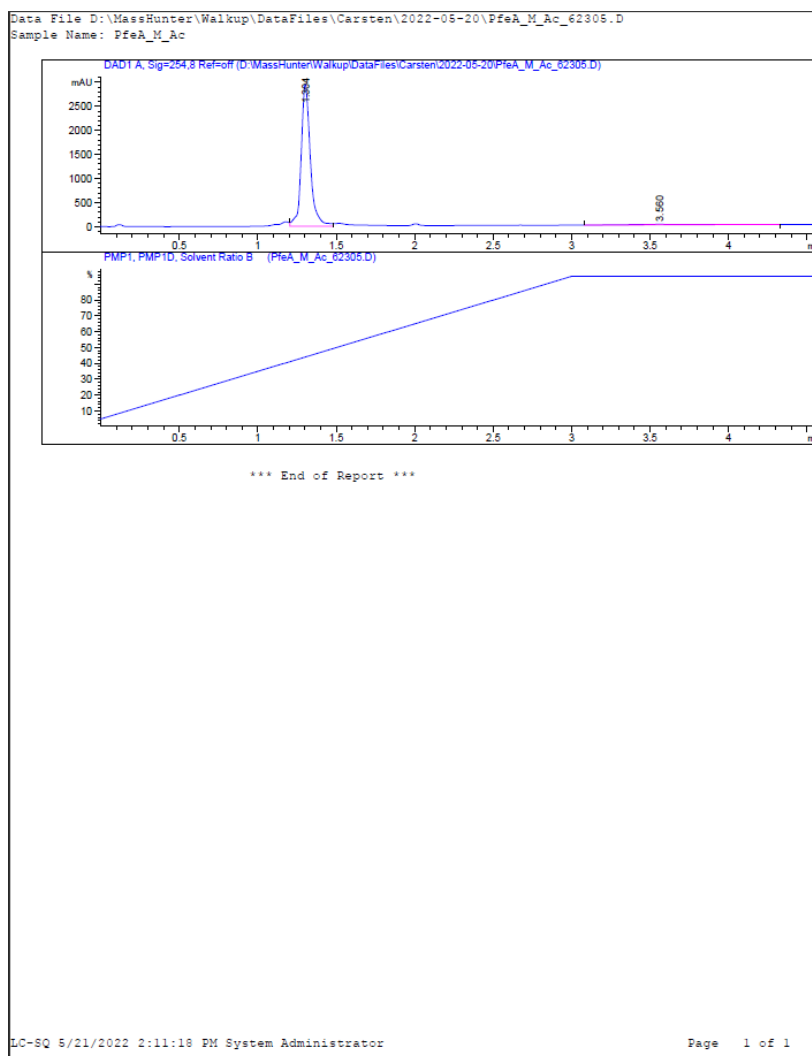

# Compound 32

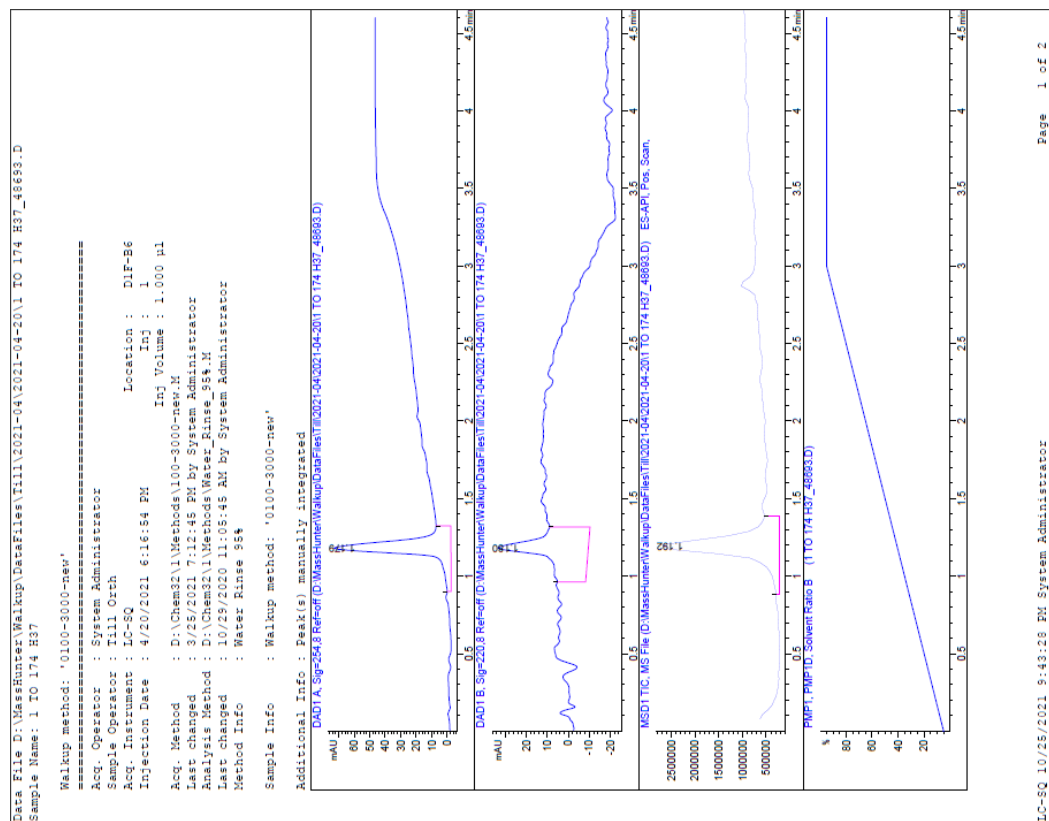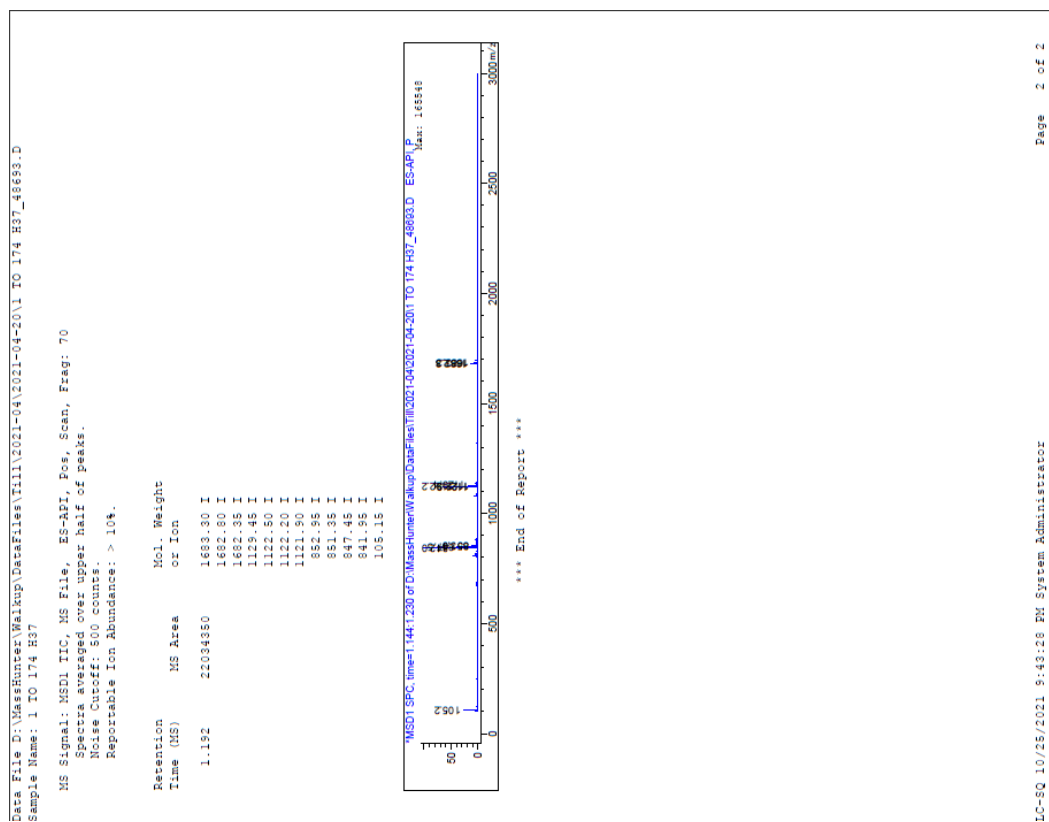

# Compound C33

Data File D:\MassHunter\Walkup\DataFiles\Till\2021-04\2021-04-22\1 TO 175 H2\_48803.D  
 Sample Name: 1 TO 175 H2

MS Signal: MSD1 TIC, MS File, ES-API, Pos, Scan, Frag: 70  
 Spectra averaged over upper half of peaks.  
 Noise Cutoff: 500 counts.  
 Reportable Ion Abundance: > 10%.

| Retention Time (MS) | MS Area  | Mol. Weight | or Ion |
|---------------------|----------|-------------|--------|
| 1.157               | 20598022 | 1151.70     | I      |
|                     |          | 1150.60     | I      |
|                     |          | 1150.10     | I      |
|                     |          | 1149.65     | I      |
|                     |          | 1122.10     | I      |
|                     |          | 1121.60     | I      |
|                     |          | 1115.56     | I      |
|                     |          | 1113.96     | I      |
|                     |          | 1105.56     | I      |
|                     |          | 1105.05     | I      |
|                     |          | 1104.65     | I      |
|                     |          | 1103.20     | I      |
|                     |          | 1086.70     | I      |
|                     |          | 1094.15     | I      |
|                     |          | 1093.65     | I      |
|                     |          | 1086.05     | I      |
|                     |          | 1075.15     | I      |
|                     |          | 1074.65     | I      |
|                     |          | 889.40      | I      |
|                     |          | 889.40      | I      |
|                     |          | 775.50      | I      |
|                     |          | 774.20      | I      |
|                     |          | 767.80      | I      |
|                     |          | 766.50      | I      |
|                     |          | 755.50      | I      |
|                     |          | 754.15      | I      |
|                     |          | 745.65      | I      |
|                     |          | 745.30      | I      |
|                     |          | 743.05      | I      |
|                     |          | 742.00      | I      |
|                     |          | 737.45      | I      |
|                     |          | 736.50      | I      |
|                     |          | 735.65      | I      |
|                     |          | 733.55      | I      |
|                     |          | 724.30      | I      |
|                     |          | 717.30      | I      |
|                     |          | 716.75      | I      |
|                     |          | 710.75      | I      |
|                     |          | 696.10      | I      |
|                     |          | 587.25      | I      |
|                     |          | 577.10      | I      |
|                     |          | 530.20      | I      |
|                     |          | 157.70      | I      |
|                     |          | 152.10      | I      |
|                     |          | 152.15      | I      |
|                     |          | 151.10      | I      |

Data File D:\MassHunter\Walkup\DataFiles\Till\2021-04\2021-04-22\1 TO 175 H2\_48803.D  
 Sample Name: 1 TO 175 H2

Walkup method: '0100-3000-new'  
 Acq. Operator : System Administrator  
 Sample Operator : Till Orth  
 Acq. Instrument : LC-SQ  
 Injection Date : 4/22/2021 8:23:36 PM  
 Location : DIP-22  
 Inj Volume : 1.000 uL  
 Inj : 1  
 Acq. Method : D:\Chem321\Methods\100-3000-new.M  
 Last changed : 3/25/2021 7:12:45 PM By System Administrator  
 Analysis Method : D:\Chem321\Methods\Water\_Rinse\_56.M  
 Last changed : 5/21/2022 2:42:22 PM By System Administrator  
 (modified after loading)  
 Method Info : Water Rinse 56%

Sample Info : Walkup method: '0100-3000-new'

Additional Info : Peak(s) manually integrated  
 MSD1 TIC, MS File (D:\MassHunter\Walkup\DataFiles\Till\2021-04\2021-04-22\1 TO 175 H2\_48803.D) ES-API Pos Scan

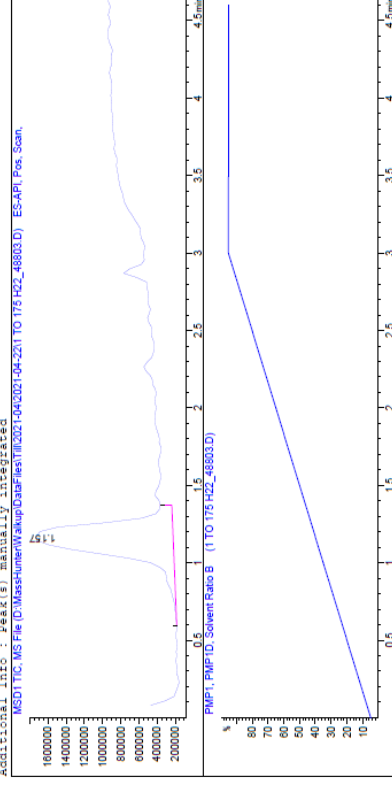

# Compound C34

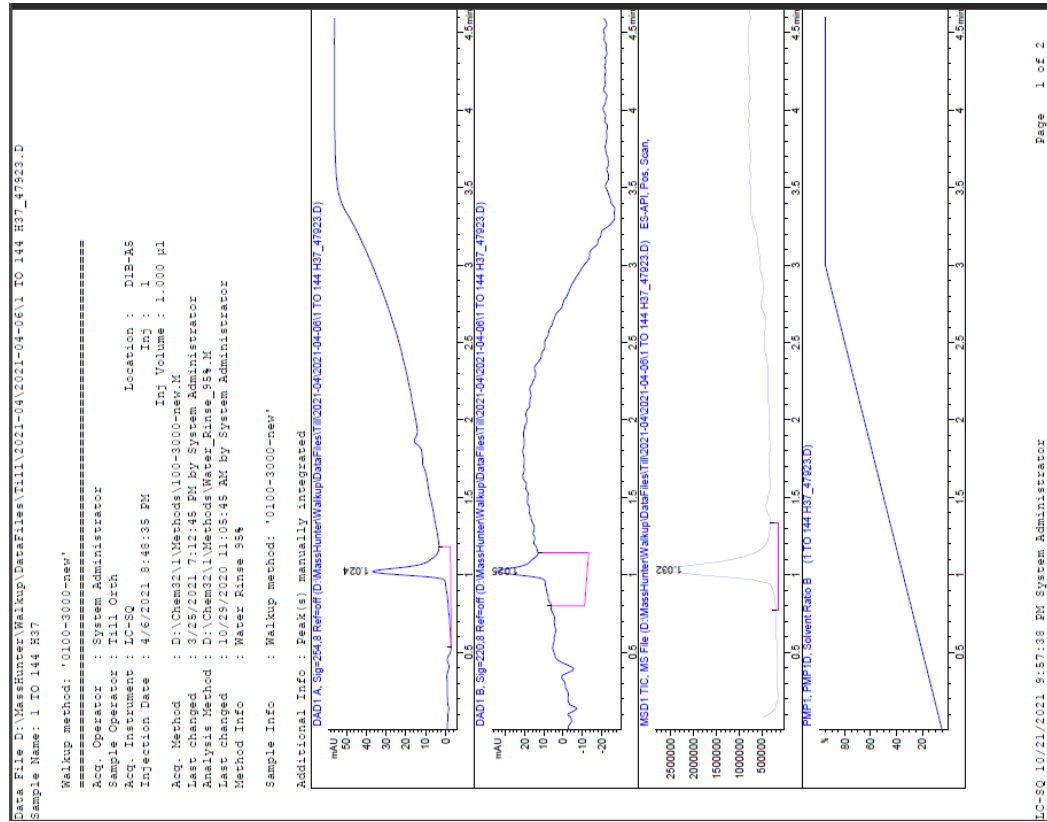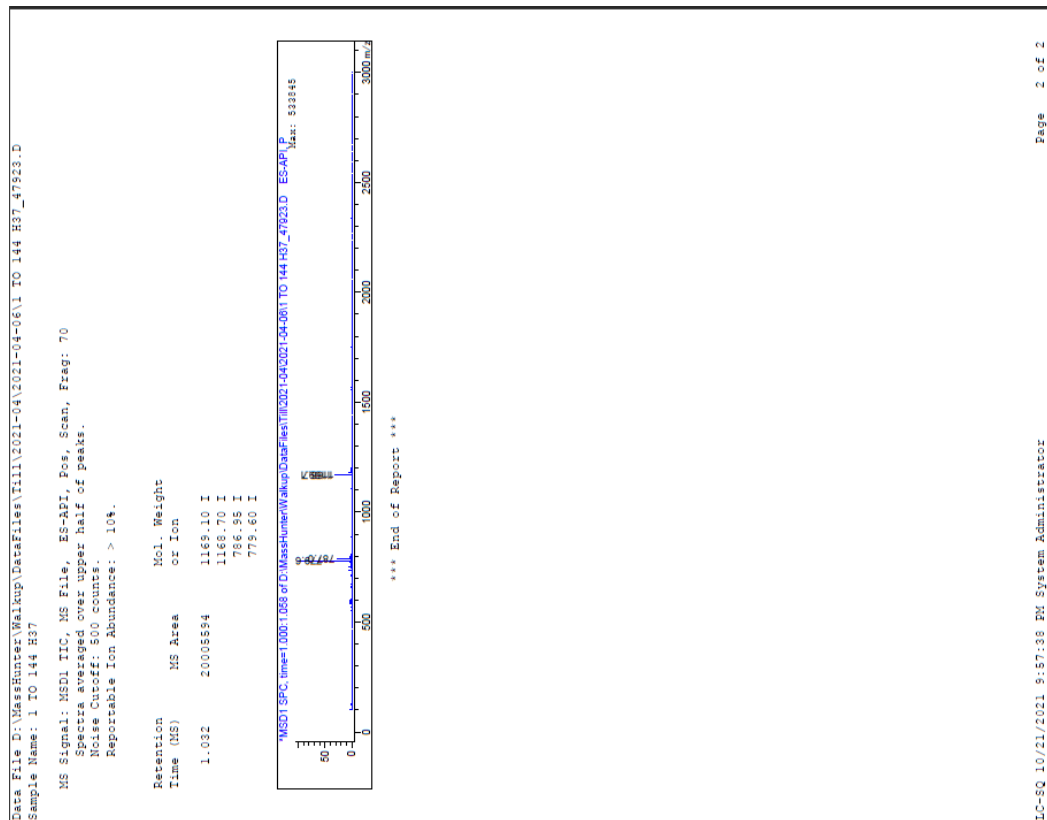

Compound N33L

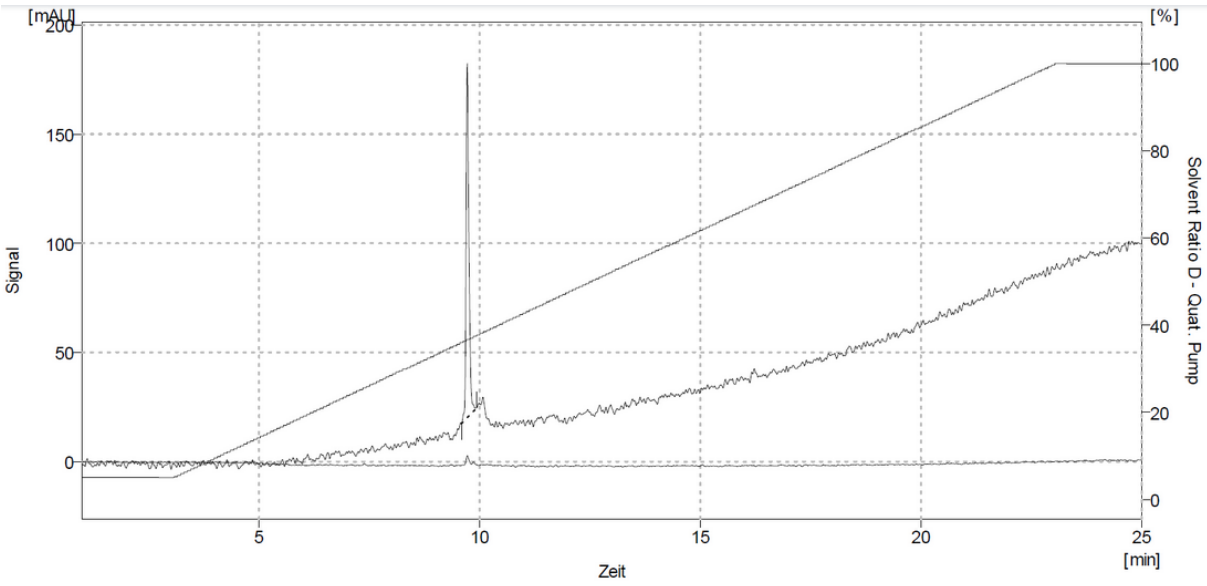

# Compound N34<sub>L</sub>

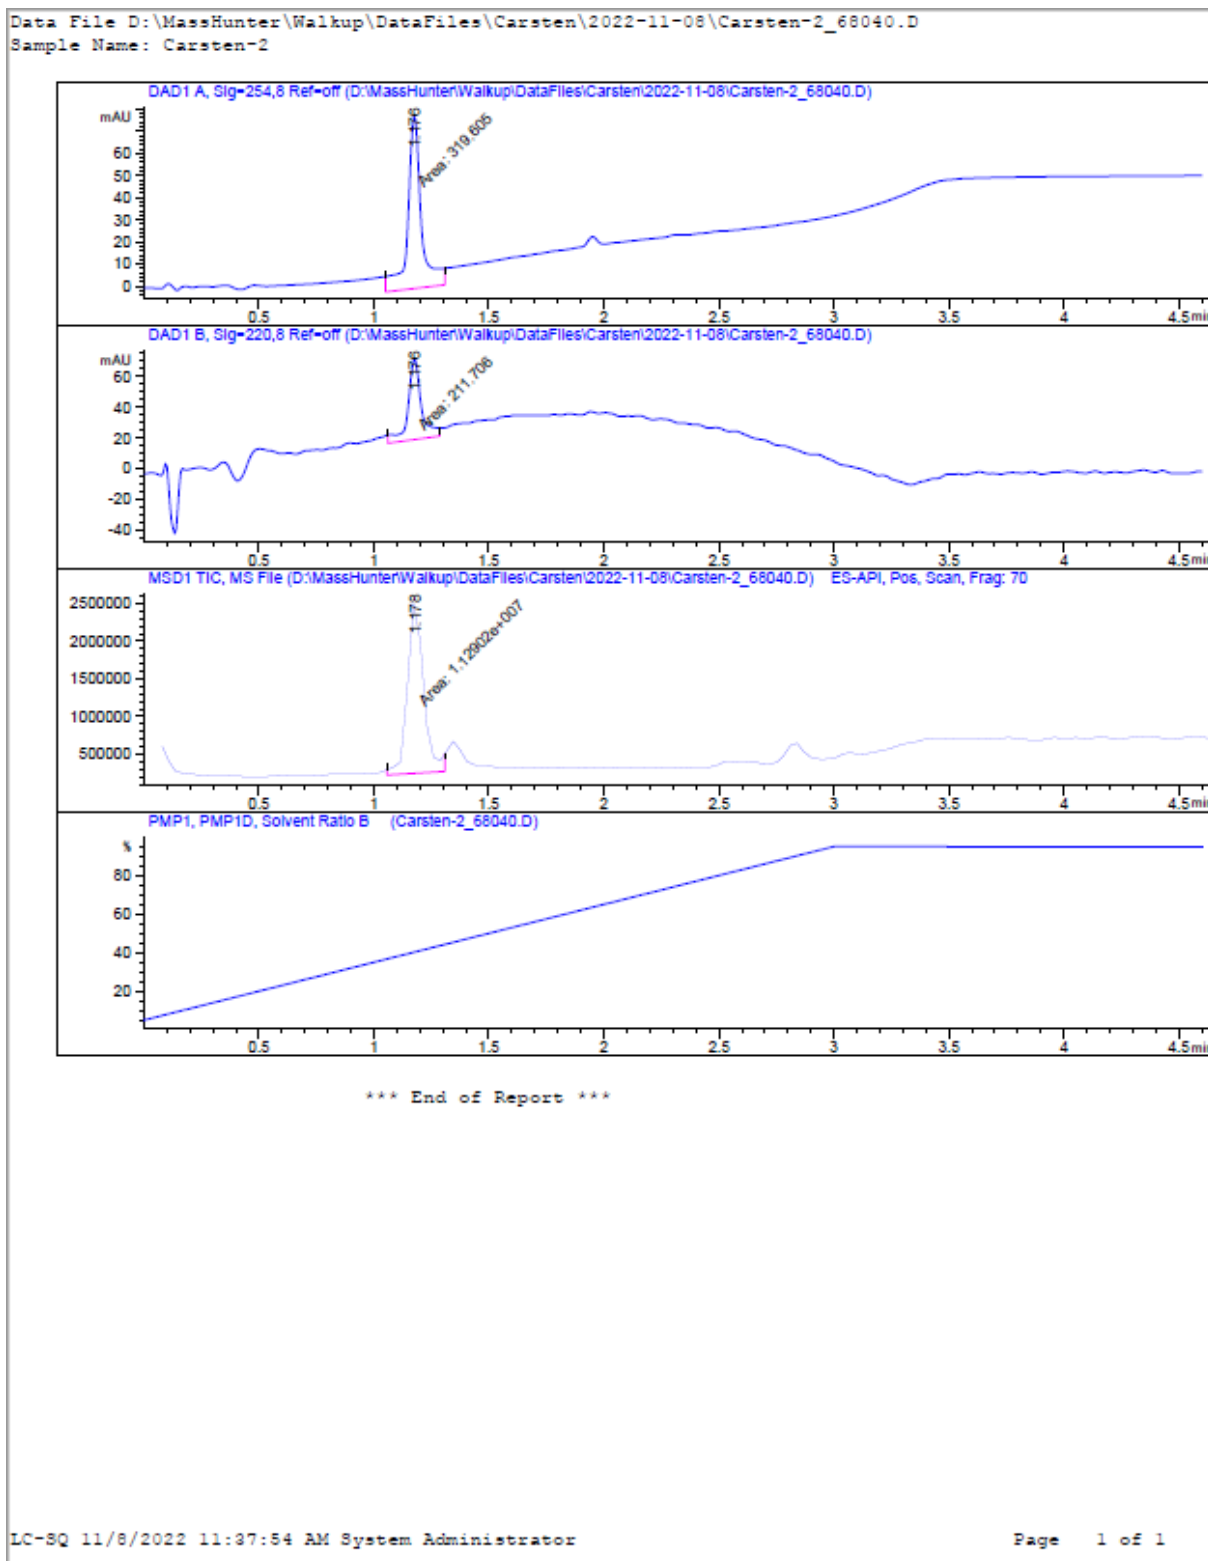

Compound N34b

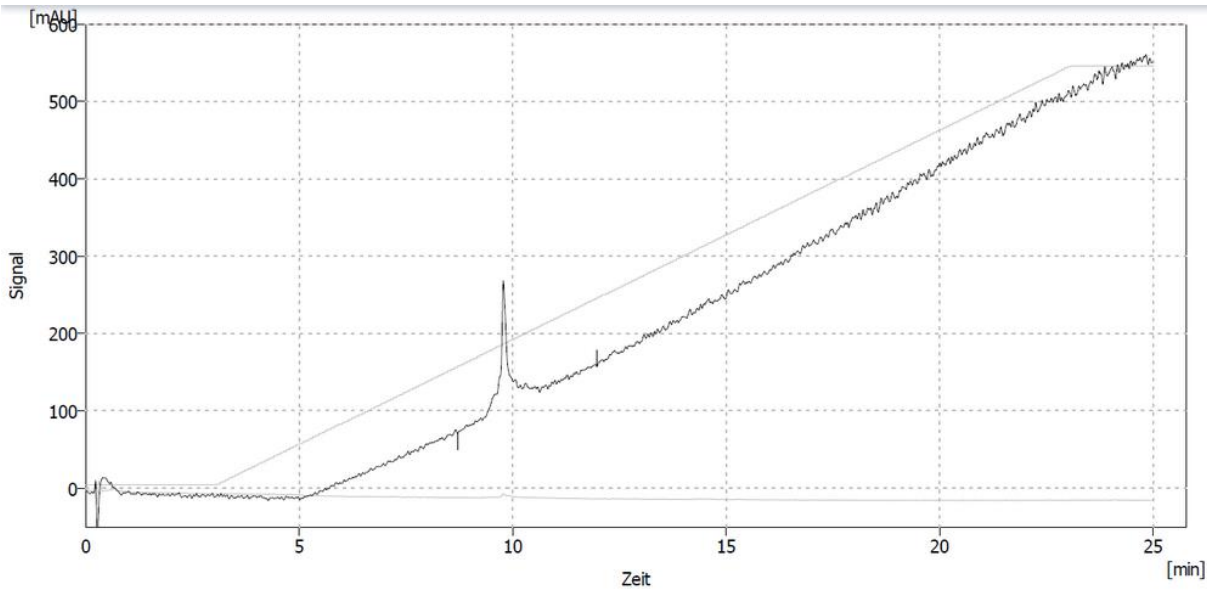

# Compound N34b

Data File D:\MassHunter\Walkup\DataFiles\Carsten\2022-11-28\c4\_68843.D  
Sample Name: c4

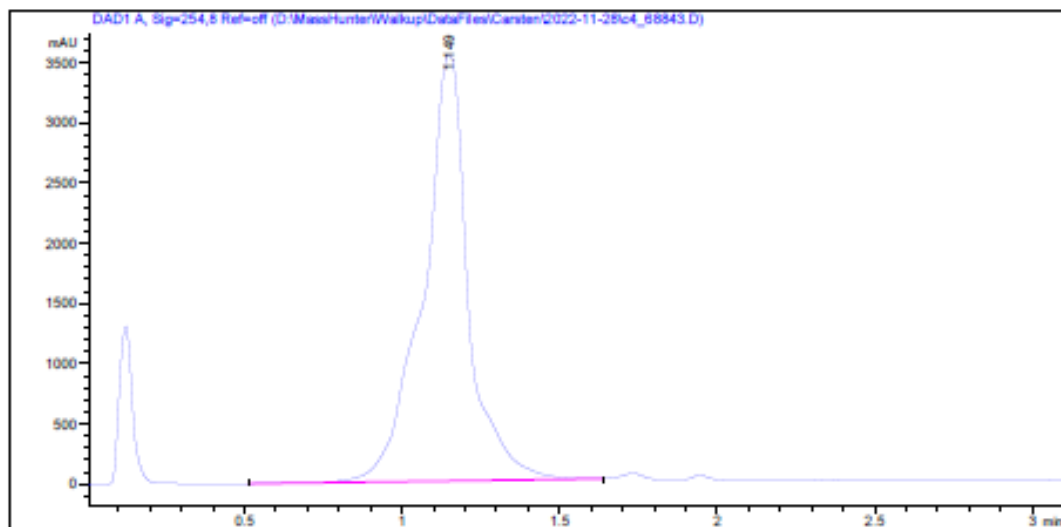

\*\*\* End of Report \*\*\*



## Supplementary References

1. Díaz-Mochón, J. J.; Bialy, L.; Bradley, M., Full Orthogonality between Dde and Fmoc: The direct Synthesis of PNA–peptide conjugates. *Org. Lett.* **2004**, *6* (7), 1127-1129.
2. Ferreira, K.; Hu, H.-Y.; Fetz, V.; Prochnow, H.; Rais, B.; Müller, P. P.; Brönstrup, M., Multivalent siderophore–DOTAM conjugates as theranostics for imaging and treatment of bacterial infections. *Angew. Chem. Int. Ed.* **2017**, *56* (28), 8272-8276.
3. Peukert, C.; Langer, L. N. B.; Wegener, S. M.; Tutov, A.; Bankstahl, J. P.; Karge, B.; Bengel, F. M.; Ross, T. L.; Brönstrup, M., Optimization of artificial siderophores as <sup>68</sup>Ga-complexed PET tracers for in vivo imaging of bacterial infections. *J. Med. Chem.* **2021**, *64* (16), 12359-12378.
4. Pinkert, L.; Lai, Y.-H.; Peukert, C.; Hotop, S.-K.; Karge, B.; Schulze, L. M.; Grunenberg, J.; Brönstrup, M., Antibiotic conjugates with an artificial MECAM-Based siderophore are potent agents against Gram-positive and Gram-negative bacterial pathogens. *J. Med. Chem.* **2021**, *64* (20), 15440-15460.
5. Svedhem, S.; Hollander, C.-Å.; Shi, J.; Konradsson, P.; Liedberg, B.; Svensson, S. C. T., Synthesis of a Series of Oligo(ethylene glycol)-Terminated Alkanethiol Amides Designed to Address Structure and Stability of Biosensing Interfaces. *J. Org. Chem.* **2001**, *66* (13), 4494-4503.
6. Pinkert, L. Synthese von Siderophor-Antibiotika-Konjugaten als neuartige antibakterielle Wirkstoffe. Gottfried Wilhelm Leibniz Universität Hannover, Dissertation, 2021.
7. Moynié, L.; Milenkovic, S.; Mislin, G. L. A.; Gasser, V.; Malloci, G.; Baco, E.; McCaughan, R. P.; Page, M. G. P.; Schalk, I. J.; Ceccarelli, M.; Naismith, J. H., The complex of ferric-enterobactin with its transporter from *Pseudomonas aeruginosa* suggests a two-site model. *Nat. Commun.* **2019**, *10* (1), 3673.
8. Brillet, K.; Journet, L.; Célia, H.; Paulus, L.; Stahl, A.; Pattus, F.; Cobessi, D., A  $\beta$  Strand Lock Exchange for Signal Transduction in TonB-Dependent Transducers on the Basis of a Common Structural Motif. *Structure* **2007**, *15* (11), 1383-1391.
9. Nikaido, H., Molecular basis of bacterial outer membrane permeability revisited. *Microbiol. Mol. Biol. Rev.* **2003**, *67* (4), 593-656.
10. Smith, A. D.; Modi, A. R.; Sun, S.; Dawson, J. H.; Wilks, A., Spectroscopic Determination of Distinct Heme Ligands in Outer-Membrane Receptors PhuR and HasR of *Pseudomonas aeruginosa*. *Biochemistry* **2015**, *54* (16), 2601-2612.
11. Cobessi, D.; Celia, H.; Folschweiller, N.; Schalk, I. J.; Abdallah, M. A.; Pattus, F., The crystal structure of the pyoverdine outer membrane receptor FpvA from *Pseudomonas aeruginosa* at 3.6Å resolution. *J. Mol. Biol.* **2005**, *347* (1), 121-134.
12. Zheng, T.; Bullock, J. L.; Nolan, E. M., Siderophore-mediated cargo delivery to the cytoplasm of *Escherichia coli* and *Pseudomonas aeruginosa*: Syntheses of monofunctionalized enterobactin scaffolds and evaluation of enterobactin–cargo conjugate uptake. *J. Am. Chem. Soc.* **2012**, *134* (44), 18388-18400.
13. Suits, M. D. L.; Pal, G. P.; Nakatsu, K.; Matte, A.; Cygler, M.; Jia, Z., Identification of an  $\alpha$ -helix in *Escherichia coli* O157:H7 heme oxygenase with tandem functional repeats. *Proc. Natl. Acad. Sci. U.S.A.* **2005**, *102* (47), 16955.
14. Ankenbauer, R. G.; Quan, H. N., FptA, the Fe(III)-pyochelin receptor of *Pseudomonas aeruginosa*: A phenolate siderophore receptor homologous to hydroxamate siderophore receptors. *J. Bacteriol.* **1994**, *176* (2), 307-319.
15. Schwyn, B.; Neilands, J. B., Universal chemical assay for the detection and determination of siderophores. *Anal. Biochem.* **1987**, *160*, 47 – 56.
